# Supplementary material for: Targeted remodeling of the human gut microbiome using Juemingzi (Senna seed extracts)
Source: Front Cell Infect Microbiol. 2024 Apr 4;14:1296619. doi: 10.3389/fcimb.2024.1296619 (PMC11024242; doi:10.3389/fcimb.2024.1296619)
Supplement: Supplementary File 1 — NCBI accessions and read counts for raw sequencing data. [file Table_1.xlsx]

## Sheet: Sheet1
SampleID	Donor	Treatment	Raw_reads(total # paired reads)	NCBI_BioSampleID
1	1	Inoculum	2033278	SAMN34376075
2	2	Inoculum	794746	SAMN34376076
3	3	Inoculum	1774408	SAMN34376077
4	4	Inoculum	2206024	SAMN34376078
5	5	Inoculum	1804864	SAMN34376079
6	6	Inoculum	1234320	SAMN34376080
7	1	NSC	2227016	SAMN34376081
19	2	NSC	4325658	SAMN34376093
31	3	NSC	3169480	SAMN34376105
43	4	NSC	3559434	SAMN34376117
55	5	NSC	2509528	SAMN34376129
67	6	NSC	3669574	SAMN34376141
10	1	SSE	2360634	SAMN34376084
22	2	SSE	1724242	SAMN34376096
34	3	SSE	1385436	SAMN34376108
46	4	SSE	15752764	SAMN34376120
58	5	SSE	6337472	SAMN34376132
70	6	SSE	4070754	SAMN34376144
