# Supplementary material for: Targeted remodeling of the human gut microbiome using Juemingzi (Senna seed extracts)
Source: Front Cell Infect Microbiol. 2024 Apr 4;14:1296619. doi: 10.3389/fcimb.2024.1296619 (PMC11024242; doi:10.3389/fcimb.2024.1296619)
Supplement: Supplementary File 2 — Cell counts, SCFA, gas, and pH measurements, and alpha diversity metrics for all samples. [file Table_2.xlsx]

## Sheet: Supplementary_File_2_ SSE_ferme
SampleID	Timepoint(ours)	Donor	donorAge	donorGender	TreatmentCode	TreatmentName	TreatmentConcentration(g/L)	pH	Gas_production(mbar)	Acetate(mM)	Propionate(mM)	Butyrate(mM)	Valerate(mM)	BCFA(mM)	total_SCFA(mM)	Cell_count(cells/mL)	ShannonDiversity	ObservedTaxa
sample_1	0	1	29	F	Blank	Inoculum	0	6.65	0	0.42	0.24	0.27	0.14	0.35	1.52	2850000000	3.59967	96
sample_2	0	2	25	F	Blank	Inoculum	0	6.66	0	0.43	0.24	0.22	0.14	0.21	1.34	1300000000	3.57774	73
sample_3	0	3	40	F	Blank	Inoculum	0	6.64	0	0.42	0.25	0.21	0	0	0.88	2090000000	3.98498	118
sample_4	0	4	38	M	Blank	Inoculum	0	6.65	0	0.39	0.23	0.2	0.14	0.09	1.15	1820000000	3.65134	109
sample_5	0	5	30	M	Blank	Inoculum	0	6.64	0	0.41	0.26	0.18	0	0.22	1.17	1190000000	3.53688	83
sample_6	0	6	31	M	Blank	Inoculum	0	6.64	0	0.65	0.25	0.29	0.15	0.09	1.52	456000000	3.49011	78
sample_7	48	1	29	F	NSC	No substrate control	0	6.52	112.65	15.29	4.49	2.26	0.87	1.73	24.74	5740000000	3.40704	97
sample_19	48	2	25	F	NSC	No substrate control	0	6.54	117.66	12.18	4.63	1.56	0.71	0.72	19.9	4230000000	3.24421	95
sample_31	48	3	40	F	NSC	No substrate control	0	6.52	118.16	13.47	4.42	1.89	0.86	0.93	21.69	4570000000	3.41034	90
sample_43	48	4	38	M	NSC	No substrate control	0	6.51	97.23	13.36	4.76	2.37	0.9	1.62	23.12	3860000000	3.48361	97
sample_55	48	5	30	M	NSC	No substrate control	0	6.5	146.74	13.47	5.15	2.91	0.75	1.1	23.48	3570000000	3.35415	69
sample_67	48	6	31	M	NSC	No substrate control	0	6.53	133.48	11.72	4.09	1.56	0.15	0.82	18.44	2230000000	2.97143	84
sample_10	48	1	29	F	Product 03	Senna seed extract (Juemingzi)	3	6.39	330.22	15.5	4.53	0.64	0.14	0.35	21.17	3500000000	2.355	86
sample_22	48	2	25	F	Product 03	Senna seed extract (Juemingzi)	3	6.42	344.28	16.08	3.8	0.59	0.16	0.36	21.08	2460000000	1.62539	50
sample_34	48	3	40	F	Product 03	Senna seed extract (Juemingzi)	3	6.36	324.87	18	4.74	0.73	0.15	0.36	23.99	2180000000	2.73357	72
sample_46	48	4	38	M	Product 03	Senna seed extract (Juemingzi)	3	6.39	302.9	16.25	5.15	1.87	0.46	0.49	24.32	2620000000	1.78647	51
sample_58	48	5	30	M	Product 03	Senna seed extract (Juemingzi)	3	6.39	317.74	15.19	4.44	1.45	0.15	0.38	21.61	3350000000	1.66264	90
sample_70	48	6	31	M	Product 03	Senna seed extract (Juemingzi)	3	6.38	223.8	13.91	4.72	0.29	0.14	0.22	19.38	1910000000	1.0295	28
