# Supplementary material for: Targeted remodeling of the human gut microbiome using Juemingzi (Senna seed extracts)
Source: Front Cell Infect Microbiol. 2024 Apr 4;14:1296619. doi: 10.3389/fcimb.2024.1296619 (PMC11024242; doi:10.3389/fcimb.2024.1296619)
Supplement: Supplementary File 3 — MetaPhlAn taxonomic profile and relative abundances. [file Table_3.xlsx]

## Sheet: Sheet1
taxon	sample_1	sample_2	sample_3	sample_4	sample_5	sample_6	sample_7	sample_10	sample_19	sample_22	sample_31	sample_34	sample_43	sample_46	sample_55	sample_58	sample_67	sample_70
UNCLASSIFIED	0	0	0	0	0	0	0	3.04408	0	28.8572	0	0	0	0	0	0	0	5.51953
k__Bacteria	100	100	100	100	100	100	100	96.9559	100	71.1428	99.934	100	99.9379	100	100	100	100	94.4805
k__Bacteria|p__Proteobacteria	0.34413	2.84008	0.88932	2.08305	2.2632	0.27602	13.9826	63.7355	7.73264	54.9592	16.2647	51.796	18.2415	63.9061	8.35784	70.2139	27.7664	70.6262
k__Bacteria|p__Firmicutes	76.437	73.3706	72.7376	59.7685	59.6115	66.9313	31.8366	25.3871	26.798	14.0327	22.5186	21.5065	34.5127	22.8238	28.6988	24.1148	19.6043	6.50634
k__Bacteria|p__Actinobacteria	7.46943	2.87854	8.0673	16.8365	5.78715	7.67354	23.8498	6.35378	28.0652	2.02774	26.601	23.3827	21.1248	10.0255	21.1897	4.73581	24.7586	17.348
k__Bacteria|p__Bacteroidetes	15.7494	20.9108	18.3058	19.1113	31.7007	25.1191	30.3207	1.47951	37.4041	0.123219	34.4369	3.31481	24.1989	2.20208	41.1048	0.60445	27.8196	0
k__Bacteria|p__Proteobacteria|c__Gammaproteobacteria	0	0	0	1.36562	0	0	13.6621	63.2097	5.63383	53.5236	14.4944	50.4989	17.3596	63.1472	7.95693	69.1869	25.5447	69.9942
k__Bacteria|p__Firmicutes|c__Clostridia	73.7397	72.1152	70.8249	58.7256	58.4188	65.4677	30.4447	22.2822	25.0949	11.0967	20.7019	17.3733	34.216	22.0982	26.0865	20.6668	12.6316	0.892359
k__Bacteria|p__Actinobacteria|c__Actinobacteria	5.58774	1.04552	6.27298	11.5992	4.92219	4.98218	21.1685	5.79259	22.2292	1.21188	24.023	22.2575	19.2722	9.75246	18.5549	4.20919	23.0302	15.9524
k__Bacteria|p__Firmicutes|c__Negativicutes	0.45543	0.90113	1.1584	0.82273	1.19276	0.27585	0.94069	2.50495	0.42666	1.44334	1.73928	3.98707	0.21764	0.72562	2.61232	3.04054	2.05981	5.45053
k__Bacteria|p__Bacteroidetes|c__Bacteroidia	15.7494	20.9108	18.3058	19.1013	31.7007	25.1191	30.3207	1.47951	37.4041	0.123219	34.4369	3.31481	24.1706	2.20208	41.1048	0.60445	27.8196	0
k__Bacteria|p__Actinobacteria|c__Coriobacteriia	1.88168	1.83303	1.79432	5.23725	0.86496	2.69136	2.68138	0.561191	5.836	0.815859	2.57794	1.12516	1.85258	0.27304	2.63476	0.5153	1.72839	1.39557
k__Bacteria|p__Proteobacteria|c__Deltaproteobacteria	0.06329	1.27693	0.09978	0.24998	0.65366	0	0.03099	0.5214	0.87869	1.43559	0.07265	0.46161	0.40446	0.72421	0.40092	1.01482	0.14239	0.362909
k__Bacteria|p__Firmicutes|c__Firmicutes_unclassified	1.09261	0	0.48913	0	0	0.14519	0.31818	0.401504	0	0	0.07749	0.14616	0	0	0	0	0	0
k__Bacteria|p__Firmicutes|c__CFGB1340	1.06604	0	0	0	0	0.67604	0.10986	0.198459	0	0	0	0	0	0	0	0	0	0
k__Bacteria|p__Proteobacteria|c__Alphaproteobacteria	0.28084	0	0	0.08247	1.60955	0	0.22145	0.00234633	0	0	0	0	0.0991	0	0	0.01216	0	0
k__Bacteria|p__Proteobacteria|c__Gammaproteobacteria|o__Enterobacterales	0	0	0	1.36562	0	0	13.6621	63.2097	5.63383	53.5236	14.4944	50.4989	17.3596	63.1472	7.95693	69.1869	25.5447	69.9942
k__Bacteria|p__Firmicutes|c__Clostridia|o__Clostridiales	72.6711	71.8573	66.068	56.2264	57.5046	65.325	30.1563	21.9621	23.7389	11.021	19.0801	16.189	33.1151	21.867	25.687	20.6171	11.502	0.892359
k__Bacteria|p__Actinobacteria|c__Actinobacteria|o__Bifidobacteriales	5.58774	1.04552	6.27298	11.5992	4.92219	4.98218	21.1685	5.79259	22.2292	1.21188	24.0126	22.2575	19.2722	9.75246	18.5549	4.20919	23.0302	15.9524
k__Bacteria|p__Bacteroidetes|c__Bacteroidia|o__Bacteroidales	15.7494	20.9108	18.3058	19.1013	31.7007	25.1191	30.3207	1.47951	37.4041	0.123219	34.4369	3.31481	24.1706	2.20208	41.1048	0.60445	27.8196	0
k__Bacteria|p__Firmicutes|c__Negativicutes|o__Veillonellales	0	0	0.65146	0.00892	0	0	0.80352	1.35078	0.33348	0	0.83747	2.66482	0.20104	0.72562	0	0.45464	2.05981	5.45053
k__Bacteria|p__Firmicutes|c__Negativicutes|o__Acidaminococcales	0.45543	0.90113	0.50694	0.77498	1.19276	0.27585	0.13717	1.15417	0.09318	1.44334	0.90181	1.32224	0.0166	0	2.61232	2.5859	0	0
k__Bacteria|p__Proteobacteria|c__Deltaproteobacteria|o__Desulfovibrionales	0.06329	1.27693	0.09978	0.24998	0.65366	0	0.03099	0.5214	0.87869	1.43559	0.07265	0.46161	0.40446	0.72421	0.40092	1.01482	0.14239	0.362909
k__Bacteria|p__Firmicutes|c__Firmicutes_unclassified|o__Firmicutes_unclassified	1.09261	0	0.48913	0	0	0.14519	0.31818	0.401504	0	0	0.07749	0.14616	0	0	0	0	0	0
k__Bacteria|p__Firmicutes|c__Clostridia|o__Clostridia_unclassified	1.06858	0.2579	4.75687	2.49917	0.91421	0.1427	0.28844	0.320139	1.35606	0.0756533	1.62172	1.18429	1.10081	0.23121	0.39953	0.04969	1.12963	0
k__Bacteria|p__Actinobacteria|c__Coriobacteriia|o__Eggerthellales	1.08108	0	0.64188	0.55412	0.44893	0.40172	0.55223	0.305557	0.14999	0	0.62694	0.17034	0.8617	0	1.35454	0.16427	0.01049	0.00311786
k__Bacteria|p__Firmicutes|c__CFGB1340|o__OFGB1340	1.06604	0	0	0	0	0.67604	0.10986	0.198459	0	0	0	0	0	0	0	0	0	0
k__Bacteria|p__Actinobacteria|c__Coriobacteriia|o__Coriobacteriales	0.63691	1.79944	0.77733	4.68312	0.41603	1.75934	2.10947	0.196491	5.63895	0.801744	1.88847	0.75952	0.99088	0.27304	1.28022	0.35103	1.69825	1.28495
k__Bacteria|p__Actinobacteria|c__Coriobacteriia|o__Coriobacteriia_unclassified	0.16369	0.03359	0.37511	0	0	0.5303	0.01969	0.0591431	0.04707	0.0141147	0.06253	0.1953	0	0	0	0	0.01964	0.1075
k__Bacteria|p__Proteobacteria|c__Alphaproteobacteria|o__Rhodobacterales	0	0	0	0	0	0	0.22145	0.00234633	0	0	0	0	0	0	0	0	0	0
k__Bacteria|p__Proteobacteria|c__Gammaproteobacteria|o__Enterobacterales|f__Enterobacteriaceae	0	0	0	1.36562	0	0	13.6621	63.2097	5.63383	53.5236	14.4944	50.4989	17.3596	63.1472	7.95693	69.1869	25.4241	69.5051
k__Bacteria|p__Firmicutes|c__Clostridia|o__Clostridiales|f__Ruminococcaceae	41.0823	26.875	36.8768	33.0048	24.0382	20.64	10.9179	12.6039	6.14514	3.31811	8.15515	9.14805	14.6925	13.4241	6.4556	8.64067	1.60431	0.422129
k__Bacteria|p__Firmicutes|c__Clostridia|o__Clostridiales|f__Lachnospiraceae	25.3494	37.5951	22.5345	19.5816	27.1379	41.999	9.86153	8.29511	6.83077	6.0457	5.9919	5.56737	10.7932	5.75503	11.0698	8.16597	8.34973	0.47022
k__Bacteria|p__Actinobacteria|c__Actinobacteria|o__Bifidobacteriales|f__Bifidobacteriaceae	5.58774	1.04552	6.27298	11.5992	4.92219	4.98218	21.1685	5.79259	22.2292	1.21188	24.0126	22.2575	19.2722	9.75246	18.5549	4.20919	23.0302	15.9524
k__Bacteria|p__Firmicutes|c__Negativicutes|o__Veillonellales|f__Veillonellaceae	0	0	0.65146	0.00892	0	0	0.80352	1.35078	0.33348	0	0.83747	2.66482	0.20104	0.72562	0	0.45464	2.05981	5.45053
k__Bacteria|p__Firmicutes|c__Negativicutes|o__Acidaminococcales|f__Acidaminococcaceae	0.45543	0.90113	0.50694	0.77498	1.19276	0.27585	0.13717	1.15417	0.09318	1.44334	0.90181	1.32224	0.0166	0	2.61232	2.5859	0	0
k__Bacteria|p__Firmicutes|c__Clostridia|o__Clostridiales|f__Clostridiaceae	4.34861	5.79743	2.54307	1.55894	3.4919	1.87872	3.67462	0.850371	7.5712	1.50481	2.4918	0.40555	3.37868	1.58756	3.40981	1.50688	0.7653	0
k__Bacteria|p__Bacteroidetes|c__Bacteroidia|o__Bacteroidales|f__Rikenellaceae	1.88388	0.1114	5.58129	6.11366	0.19358	0.33108	2.27207	0.665176	1.66095	0	4.32647	1.02785	4.63595	0.58236	1.39553	0.08008	1.26807	0
k__Bacteria|p__Bacteroidetes|c__Bacteroidia|o__Bacteroidales|f__Bacteroidales_unclassified	1.94984	4.76405	4.53123	2.25459	8.59731	1.19707	7.53397	0.6469	12.307	0.108073	3.25538	0.10529	5.7486	0.05447	3.62276	0.06863	6.93994	0
k__Bacteria|p__Proteobacteria|c__Deltaproteobacteria|o__Desulfovibrionales|f__Desulfovibrionaceae	0.06329	1.27693	0.09978	0.24998	0.65366	0	0.03099	0.5214	0.87869	1.43559	0.07265	0.46161	0.40446	0.72421	0.40092	1.01482	0.14239	0.362909
k__Bacteria|p__Firmicutes|c__Firmicutes_unclassified|o__Firmicutes_unclassified|f__Firmicutes_unclassified	1.09261	0	0.48913	0	0	0.14519	0.31818	0.401504	0	0	0.07749	0.14616	0	0	0	0	0	0
k__Bacteria|p__Firmicutes|c__Clostridia|o__Clostridia_unclassified|f__Clostridia_unclassified	1.06858	0.2579	4.75687	2.49917	0.91421	0.1427	0.28844	0.320139	1.35606	0.0756533	1.62172	1.18429	1.10081	0.23121	0.39953	0.04969	1.12963	0
k__Bacteria|p__Actinobacteria|c__Coriobacteriia|o__Eggerthellales|f__Eggerthellaceae	1.08108	0	0.64188	0.55412	0.44893	0.40172	0.55223	0.305557	0.14999	0	0.62694	0.17034	0.8617	0	1.35454	0.16427	0.01049	0.00311786
k__Bacteria|p__Firmicutes|c__CFGB1340|o__OFGB1340|f__FGB1340	1.06604	0	0	0	0	0.67604	0.10986	0.198459	0	0	0	0	0	0	0	0	0	0
k__Bacteria|p__Actinobacteria|c__Coriobacteriia|o__Coriobacteriales|f__Coriobacteriaceae	0.63691	1.79944	0.77733	4.43619	0.41603	1.70966	2.10947	0.196491	5.63895	0.801744	1.88847	0.75952	0.99088	0.27304	1.28022	0.33909	1.69825	1.28495
k__Bacteria|p__Firmicutes|c__Clostridia|o__Clostridiales|f__Oscillospiraceae	0.50376	0.3084	1.58917	1.99337	0.68961	0.08792	1.89653	0.139074	2.13469	0.144897	2.07976	0.38424	3.7297	0.92372	2.32522	0.98703	0.49292	0
k__Bacteria|p__Firmicutes|c__Clostridia|o__Clostridiales|f__Clostridiales_unclassified	1.38704	1.28144	2.38433	0.00583	0.98319	0.33224	1.87832	0.0730757	1.05705	0.00751268	0.36153	0.68382	0.12014	0.07123	0.44499	1.28287	0.05642	0
k__Bacteria|p__Bacteroidetes|c__Bacteroidia|o__Bacteroidales|f__Tannerellaceae	0.60825	0.08501	0.44064	0.62692	1.33227	0.2301	5.64298	0.0718928	4.16866	0.00496577	2.71058	0.0346	2.54583	0	6.07197	0.20905	4.31334	0
k__Bacteria|p__Bacteroidetes|c__Bacteroidia|o__Bacteroidales|f__Prevotellaceae	9.13544	15.1467	0	1.88195	14.1265	14.0476	2.52656	0.0626917	1.36001	0	0	0	0	0	2.60844	0	0	0
k__Bacteria|p__Actinobacteria|c__Coriobacteriia|o__Coriobacteriia_unclassified|f__Coriobacteriia_unclassified	0.16369	0.03359	0.37511	0	0	0.5303	0.01969	0.0591431	0.04707	0.0141147	0.06253	0.1953	0	0	0	0	0.01964	0.1075
k__Bacteria|p__Bacteroidetes|c__Bacteroidia|o__Bacteroidales|f__Bacteroidaceae	2.10707	0.80357	6.58717	7.85817	7.39452	9.31322	12.2632	0.032839	17.6779	0.0101877	23.8752	2.04483	10.9047	1.52125	27.4061	0.2467	15.0232	0
k__Bacteria|p__Proteobacteria|c__Alphaproteobacteria|o__Rhodobacterales|f__Rhodobacteraceae	0	0	0	0	0	0	0.22145	0.00234633	0	0	0	0	0	0	0	0	0	0
k__Bacteria|p__Firmicutes|c__Clostridia|o__Clostridiales|f__Eubacteriaceae	0	0	0.14019	0.08191	1.16383	0.2197	1.92743	0.000552649	0	0	0	0	0.40101	0.10539	1.98157	0.03367	0.21012	0
k__Bacteria|p__Proteobacteria|c__Gammaproteobacteria|o__Enterobacterales|f__Enterobacteriaceae|g__Escherichia	0	0	0	1.36562	0	0	13.6621	46.702	0	0	10.6109	31.4218	17.3596	62.8771	7.95693	69.1869	25.4241	69.5051
k__Bacteria|p__Proteobacteria|c__Gammaproteobacteria|o__Enterobacterales|f__Enterobacteriaceae|g__Klebsiella	0	0	0	0	0	0	0	8.94924	0	1.43097	0	0.86092	0	0.27016	0	0	0	0
k__Bacteria|p__Proteobacteria|c__Gammaproteobacteria|o__Enterobacterales|f__Enterobacteriaceae|g__Citrobacter	0	0	0	0	0	0	0	6.48169	5.40016	46.6835	3.88348	14.8189	0	0	0	0	0	0
k__Bacteria|p__Actinobacteria|c__Actinobacteria|o__Bifidobacteriales|f__Bifidobacteriaceae|g__Bifidobacterium	5.58774	1.04552	6.27298	11.5992	4.92219	4.98218	21.1685	5.79259	22.2292	1.21188	24.0126	22.2575	19.2722	9.75246	18.5549	4.20919	23.0302	15.9524
k__Bacteria|p__Firmicutes|c__Clostridia|o__Clostridiales|f__Ruminococcaceae|g__Ruminococcus	12.7372	7.73675	11.9395	4.01772	0.63985	2.35997	5.27734	5.37456	0.79947	0.944926	1.03283	1.25347	1.15067	0.10107	0	0.05291	0.03436	0.214669
k__Bacteria|p__Firmicutes|c__Clostridia|o__Clostridiales|f__Lachnospiraceae|g__Enterocloster	0	0	0	0	0	0	1.49812	2.82115	2.80349	3.43643	1.56173	3.81865	1.36597	2.22115	2.79743	3.96684	0.62888	0
k__Bacteria|p__Firmicutes|c__Clostridia|o__Clostridiales|f__Ruminococcaceae|g__Faecalibacterium	15.1096	12.7595	12.6429	15.746	14.3428	14.8377	0.63574	2.63131	0.16636	0.2882	0.71537	4.6345	2.21639	8.71772	0.4267	2.8554	0.65127	0.0278151
k__Bacteria|p__Firmicutes|c__Clostridia|o__Clostridiales|f__Ruminococcaceae|g__Gemmiger	6.29539	1.75079	5.21643	7.15948	3.30818	2.12322	2.48527	2.52202	0.33945	0.61101	1.9876	1.22443	4.37493	2.1092	3.70295	0.69201	0.18641	0.16262
k__Bacteria|p__Firmicutes|c__Clostridia|o__Clostridiales|f__Lachnospiraceae|g__Blautia	8.04523	8.21813	4.57234	6.26031	5.37082	4.494	0.94629	2.137	1.19881	1.42196	0.02518	0.16643	1.76221	0.60158	0.50684	0.3863	0.24241	0.113613
k__Bacteria|p__Firmicutes|c__Clostridia|o__Clostridiales|f__Lachnospiraceae|g__Roseburia	9.66527	8.02072	3.24574	3.48051	0.11236	16.3805	1.46006	2.00355	0.03406	0.128918	0	0	0.11872	0.10033	0	0	0.01629	0.105062
k__Bacteria|p__Firmicutes|c__Negativicutes|o__Veillonellales|f__Veillonellaceae|g__Veillonella	0	0	0.3214	0	0	0	0.80352	1.35078	0	0	0.83747	2.66482	0	0.29253	0	0.45047	2.05981	5.45053
k__Bacteria|p__Firmicutes|c__Clostridia|o__Clostridiales|f__Ruminococcaceae|g__Candidatus_Cibiobacter	1.96421	1.6508	2.85336	2.07859	1.28904	0.97446	0.83386	1.13893	0.64269	0.895091	0.12994	1.36758	0.90303	0.8034	0.47196	2.45986	0.10656	0.0170348
k__Bacteria|p__Firmicutes|c__Negativicutes|o__Acidaminococcales|f__Acidaminococcaceae|g__Phascolarctobacterium	0	0.90113	0.47707	0	1.19276	0	0.09966	1.09663	0.09318	1.44334	0.90181	1.32224	0	0	2.61232	2.5859	0	0
k__Bacteria|p__Proteobacteria|c__Gammaproteobacteria|o__Enterobacterales|f__Enterobacteriaceae|g__Raoultella	0	0	0	0	0	0	0	1.01447	0.23366	5.40118	0	3.39726	0	0	0	0	0	0
k__Bacteria|p__Firmicutes|c__Clostridia|o__Clostridiales|f__Clostridiaceae|g__Clostridium	3.62812	5.79743	1.56427	0.84891	1.1135	1.30964	1.74253	0.830932	5.35358	1.50481	0.48602	0.07907	1.30191	1.12754	0.45631	0.55807	0.3935	0
k__Bacteria|p__Bacteroidetes|c__Bacteroidia|o__Bacteroidales|f__Rikenellaceae|g__Alistipes	1.88388	0.1114	5.58129	5.44663	0.19358	0.33108	2.27207	0.665176	1.66095	0	4.32647	1.02785	4.50731	0.58236	1.39553	0.08008	1.26807	0
k__Bacteria|p__Bacteroidetes|c__Bacteroidia|o__Bacteroidales|f__Bacteroidales_unclassified|g__Phocaeicola	1.94984	4.76405	4.53123	2.25459	8.59731	1.19707	7.53397	0.6469	12.307	0.108073	3.25538	0.10529	5.7486	0.05447	3.62276	0.06863	6.93994	0
k__Bacteria|p__Firmicutes|c__Clostridia|o__Clostridiales|f__Ruminococcaceae|g__GGB9633	1.65549	2.20165	0.336	1.49205	0	0	0.22413	0.610376	1.45448	0.287097	0	0.16737	1.69543	1.05216	0	0	0	0
k__Bacteria|p__Firmicutes|c__Clostridia|o__Clostridiales|f__Lachnospiraceae|g__Lachnospiraceae_unclassified	3.21293	3.1674	6.36119	1.60182	6.74966	6.3252	0.32033	0.432811	0.3243	0.206058	0.2193	0.25044	0	0	0.2705	0.1172	0.88549	0.0931861
k__Bacteria|p__Firmicutes|c__Firmicutes_unclassified|o__Firmicutes_unclassified|f__Firmicutes_unclassified|g__Firmicutes_unclassified	1.09261	0	0.48913	0	0	0.14519	0.31818	0.401504	0	0	0.07749	0.14616	0	0	0	0	0	0
k__Bacteria|p__Proteobacteria|c__Deltaproteobacteria|o__Desulfovibrionales|f__Desulfovibrionaceae|g__Bilophila	0.06329	0.48603	0.09978	0.178	0.65366	0	0.03099	0.357651	0.66101	1.43559	0.07265	0.46161	0.40446	0.72421	0.40092	1.01482	0	0.243779
k__Bacteria|p__Firmicutes|c__Clostridia|o__Clostridiales|f__Lachnospiraceae|g__Lachnospira	1.36255	1.69033	1.79641	0.29343	0.67204	2.51189	0.10409	0.315582	0.06173	0.0677635	0	0	0	0	0	0.0317	0	0
k__Bacteria|p__Firmicutes|c__Clostridia|o__Clostridia_unclassified|f__Clostridia_unclassified|g__Clostridia_unclassified	0.80654	0.01348	2.57689	2.17645	0.91421	0.1427	0.11245	0.210074	0	0	0.204	0.12947	0.94713	0.11965	0.39953	0.04969	1.12963	0
k__Bacteria|p__Firmicutes|c__Clostridia|o__Clostridiales|f__Ruminococcaceae|g__Ruminococcaceae_unclassified	0.72702	0.29528	2.20698	0.85387	0	0	0.08869	0.200854	0.74647	0.203291	0.02634	0	0.07142	0.3785	0.06116	0.02929	0	0
k__Bacteria|p__Firmicutes|c__CFGB1340|o__OFGB1340|f__FGB1340|g__GGB3256	1.06604	0	0	0	0	0.67604	0.10986	0.198459	0	0	0	0	0	0	0	0	0	0
k__Bacteria|p__Actinobacteria|c__Coriobacteriia|o__Coriobacteriales|f__Coriobacteriaceae|g__Collinsella	0.63691	1.79944	0.77733	4.43619	0.17631	1.59094	2.10947	0.196491	5.34341	0.801744	1.88847	0.75952	0.99088	0.27304	0	0.22046	1.55674	1.28495
k__Bacteria|p__Firmicutes|c__Clostridia|o__Clostridiales|f__Lachnospiraceae|g__Dorea	0.74336	0.2485	1.992	1.4932	0.92258	0.60301	2.34791	0.196307	1.76845	0	3.47243	0.01607	3.21745	0.08385	0.8838	0.00092	1.96479	0
k__Bacteria|p__Firmicutes|c__Clostridia|o__Clostridiales|f__Lachnospiraceae|g__Anaerostipes	0.67625	0	0.34057	0	0.50147	0.80948	0.05273	0.166919	0	0	0	0	0.1143	0	0	0	0	0
k__Bacteria|p__Proteobacteria|c__Deltaproteobacteria|o__Desulfovibrionales|f__Desulfovibrionaceae|g__Desulfovibrio	0	0	0	0	0	0	0	0.163739	0	0	0	0	0	0	0	0	0.14239	0.11913
k__Bacteria|p__Actinobacteria|c__Coriobacteriia|o__Eggerthellales|f__Eggerthellaceae|g__Eggerthellaceae_unclassified	0.61466	0	0.28597	0.1401	0	0.40172	0.18751	0.154325	0.0096	0	0.02255	0.04156	0.00739	0	0	0.00221	0.01049	0.00311786
k__Bacteria|p__Firmicutes|c__Clostridia|o__Clostridiales|f__Lachnospiraceae|g__Mediterraneibacter	0.3476	0.38923	0.37968	0	2.59779	1.51056	0.26411	0.116202	0.35785	0.0444074	0	0.03365	0	0	1.40374	0.17553	0.57059	0.00857883
k__Bacteria|p__Firmicutes|c__Clostridia|o__Clostridia_unclassified|f__Clostridia_unclassified|g__GGB9758	0.26204	0.1303	2.17998	0.29675	0	0	0.06174	0.110055	0.08328	0.0756533	0.60381	1.05481	0.14714	0.11155	0	0	0	0
k__Bacteria|p__Actinobacteria|c__Coriobacteriia|o__Eggerthellales|f__Eggerthellaceae|g__Slackia	0.31502	0	0	0.31233	0	0	0.23964	0.0867949	0.14039	0	0	0	0.82379	0	0	0	0	0
k__Bacteria|p__Firmicutes|c__Clostridia|o__Clostridiales|f__Oscillospiraceae|g__Oscillibacter	0.44347	0.24644	1.58917	1.32794	0.63777	0.08792	0.32472	0.0778265	0.36738	0	0.98065	0.38424	2.13876	0.28778	1.18994	0.01497	0.38271	0
k__Bacteria|p__Firmicutes|c__Clostridia|o__Clostridiales|f__Ruminococcaceae|g__GGB9615	0.69322	0.16234	0.05197	0	0	0	0.03151	0.0761201	0.21494	0	0	0	0	0	0	0	0	0
k__Bacteria|p__Bacteroidetes|c__Bacteroidia|o__Bacteroidales|f__Tannerellaceae|g__Parabacteroides	0.60825	0	0.44064	0.62692	1.33227	0.2301	5.64298	0.0718928	4.16866	0.00496577	2.71058	0.0346	2.54583	0	6.07197	0.20905	4.31334	0
k__Bacteria|p__Actinobacteria|c__Coriobacteriia|o__Eggerthellales|f__Eggerthellaceae|g__Adlercreutzia	0.15141	0	0.35591	0.10169	0.0899	0	0.12508	0.0644369	0	0	0.43757	0.12878	0	0	0	0.04634	0	0
k__Bacteria|p__Firmicutes|c__Clostridia|o__Clostridiales|f__Lachnospiraceae|g__Faecalicatena	0.24904	0.08432	0.20964	0	0	0.11113	0	0.0643303	0.06481	0	0	0	0	0	0	0.06091	0.0225	0
k__Bacteria|p__Firmicutes|c__Clostridia|o__Clostridiales|f__Clostridiales_unclassified|g__Clostridiales_unclassified	1.26862	0.98137	2.38433	0.00583	0.88387	0.33224	0.74746	0.0637097	0.00496	0.00751268	0.31036	0.68382	0.03902	0.07123	0.14771	1.26193	0.05642	0
k__Bacteria|p__Bacteroidetes|c__Bacteroidia|o__Bacteroidales|f__Prevotellaceae|g__Prevotella	8.90295	1.34221	0	1.88195	5.54921	10.1329	0.91439	0.0626917	0	0	0	0	0	0	0.01141	0	0	0
k__Bacteria|p__Firmicutes|c__Clostridia|o__Clostridiales|f__Oscillospiraceae|g__Dysosmobacter	0.0603	0.06197	0	0.66542	0.05184	0	1.57181	0.0612374	1.76731	0.144897	1.09911	0	1.59093	0.63594	1.13528	0.97206	0.11021	0
k__Bacteria|p__Actinobacteria|c__Coriobacteriia|o__Coriobacteriia_unclassified|f__Coriobacteriia_unclassified|g__Coriobacteriia_unclassified	0.16369	0.03359	0.37511	0	0	0.5303	0.01969	0.0591431	0.04707	0.0141147	0.06253	0.1953	0	0	0	0	0.01964	0.1075
k__Bacteria|p__Firmicutes|c__Negativicutes|o__Acidaminococcales|f__Acidaminococcaceae|g__Acidaminococcaceae_unclassified	0.45543	0	0	0.77498	0	0.27585	0.03751	0.0575433	0	0	0	0	0.0166	0	0	0	0	0
k__Bacteria|p__Proteobacteria|c__Gammaproteobacteria|o__Enterobacterales|f__Enterobacteriaceae|g__Enterobacter	0	0	0	0	0	0	0	0.0511733	0	0	0	0	0	0	0	0	0	0
k__Bacteria|p__Firmicutes|c__Clostridia|o__Clostridiales|f__Ruminococcaceae|g__Agathobaculum	0.60055	0	0.08627	0.02332	0.82219	0.34463	0	0.0497093	0	0	0.07005	0	0	0	0	2.38753	0	0
k__Bacteria|p__Bacteroidetes|c__Bacteroidia|o__Bacteroidales|f__Bacteroidaceae|g__Bacteroides	2.10707	0.80357	6.58717	7.85817	6.11166	1.09479	12.2632	0.032839	17.6779	0.0101877	23.8752	2.04483	10.9047	1.52125	27.1045	0.2467	11.0833	0
k__Bacteria|p__Firmicutes|c__Clostridia|o__Clostridiales|f__Clostridiaceae|g__GGB3478	0.50375	0	0.29246	0	0	0	0	0.0194397	0	0	0	0	0	0	0	0	0	0
k__Bacteria|p__Firmicutes|c__Clostridia|o__Clostridiales|f__Lachnospiraceae|g__Anaerobutyricum	0.3736	0.37974	0.79425	0.5599	0.526	0.39785	0.08865	0.0176654	0	0	0	0	0.01276	0	0	0	0	0
k__Bacteria|p__Firmicutes|c__Clostridia|o__Clostridiales|f__Lachnospiraceae|g__Eisenbergiella	0	0	0	0	0	0	0.03192	0.0142622	0	0	0	1.15725	0.12245	2.23028	0	1.41255	0.32308	0
k__Bacteria|p__Proteobacteria|c__Gammaproteobacteria|o__Enterobacterales|f__Enterobacteriaceae|g__Kluyvera	0	0	0	0	0	0	0	0.0110821	0	0.00793242	0	0	0	0	0	0	0	0
k__Bacteria|p__Firmicutes|c__Clostridia|o__Clostridiales|f__Clostridiales_unclassified|g__Evtepia	0.11842	0.30006	0	0	0.09932	0	1.13085	0.00937564	1.05209	0	0	0	0	0	0.26861	0.01014	0	0
k__Bacteria|p__Firmicutes|c__Clostridia|o__Clostridiales|f__Lachnospiraceae|g__GGB3746	0.20809	0.06557	0	0	0	2.07003	0	0.00363585	0	0	0	0	0	0	0	0	0	0.00552711
k__Bacteria|p__Firmicutes|c__Clostridia|o__Clostridiales|f__Lachnospiraceae|g__Lacrimispora	0.27215	0.49488	0.18727	0.06979	0.72027	0.40382	1.11768	0.00312198	0.07747	0	0.50981	0	0.47981	0	0.88255	0.08714	3.53518	0
k__Bacteria|p__Firmicutes|c__Clostridia|o__Clostridiales|f__Lachnospiraceae|g__Coprococcus	0.18058	6.64095	2.05638	3.4096	0.61586	2.4859	0	0.00257903	0	0	0	0.01368	0.28003	0	0	0.05621	0.01918	0
k__Bacteria|p__Proteobacteria|c__Alphaproteobacteria|o__Rhodobacterales|f__Rhodobacteraceae|g__Rhodobacteraceae_unclassified	0	0	0	0	0	0	0.22145	0.00234633	0	0	0	0	0	0	0	0	0	0
k__Bacteria|p__Proteobacteria|c__CFGB2397|o__OFGB2397|f__FGB2397|g__GGB6561	0	0	0	0	0	0	0.06799	0.00210394	0	0	0	0	0	0	0	0	0	0
k__Bacteria|p__Firmicutes|c__Clostridia|o__Clostridiales|f__Eubacteriaceae|g__Intestinibacillus	0	0	0	0	0	0	0	0.000552649	0	0	0	0	0	0.10539	0	0	0.00135	0
k__Bacteria|p__Proteobacteria|c__Gammaproteobacteria|o__Enterobacterales|f__Enterobacteriaceae|g__Escherichia|s__Escherichia_coli	0	0	0	1.36562	0	0	13.6621	46.702	0	0	10.2834	29.6769	17.3596	62.8771	7.95693	69.1869	25.4241	69.5051
k__Bacteria|p__Proteobacteria|c__Gammaproteobacteria|o__Enterobacterales|f__Enterobacteriaceae|g__Klebsiella|s__Klebsiella_pneumoniae	0	0	0	0	0	0	0	8.52407	0	0	0	0.84976	0	0	0	0	0	0
k__Bacteria|p__Proteobacteria|c__Gammaproteobacteria|o__Enterobacterales|f__Enterobacteriaceae|g__Citrobacter|s__Citrobacter_freundii	0	0	0	0	0	0	0	6.48169	5.40016	46.6835	0	0.00527	0	0	0	0	0	0
k__Bacteria|p__Actinobacteria|c__Actinobacteria|o__Bifidobacteriales|f__Bifidobacteriaceae|g__Bifidobacterium|s__Bifidobacterium_adolescentis	4.82281	1.04552	1.30717	3.94353	2.7712	4.16908	18.2821	4.81417	21.6256	1.17352	9.07399	3.57382	7.833	3.62865	10.0781	1.68756	17.5526	14.2416
k__Bacteria|p__Firmicutes|c__Clostridia|o__Clostridiales|f__Ruminococcaceae|g__Ruminococcus|s__Ruminococcus_bromii	9.66737	0	0	1.20233	0	2.35997	4.80509	3.95045	0	0	0	0	1.15067	0.10107	0	0	0.03436	0.214669
k__Bacteria|p__Firmicutes|c__Clostridia|o__Clostridiales|f__Ruminococcaceae|g__Gemmiger|s__Gemmiger_formicilis	6.29539	1.75079	5.21643	7.00608	3.30818	2.12322	2.48527	2.52202	0.33945	0.61101	1.9876	1.22443	4.37493	2.1092	3.70295	0.69201	0.18641	0.16262
k__Bacteria|p__Firmicutes|c__Clostridia|o__Clostridiales|f__Ruminococcaceae|g__Faecalibacterium|s__Faecalibacterium_prausnitzii	13.5186	11.4247	11.986	15.2763	13.6131	13.8387	0.50263	2.40299	0.10421	0.187682	0.71537	4.53674	2.21639	8.14983	0.4267	2.73417	0.65127	0.0278151
k__Bacteria|p__Firmicutes|c__Clostridia|o__Clostridiales|f__Lachnospiraceae|g__Roseburia|s__Roseburia_faecis	9.1995	0.74731	1.85644	3.28796	0	10.9501	1.46006	2.00355	0.03406	0.128918	0	0	0.11872	0.10033	0	0	0.01629	0.0943482
k__Bacteria|p__Firmicutes|c__Clostridia|o__Clostridiales|f__Ruminococcaceae|g__Ruminococcus|s__Ruminococcus_bicirculans	3.06983	0	8.76404	0.37143	0	0	0.47225	1.42411	0	0	0.02387	0.45287	0	0	0	0	0	0
k__Bacteria|p__Firmicutes|c__Clostridia|o__Clostridiales|f__Lachnospiraceae|g__Enterocloster|s__Enterocloster_clostridioformis	0	0	0	0	0	0	0.42733	1.36574	0	0	0	0	0.41036	0.42792	0	0	0	0
k__Bacteria|p__Firmicutes|c__Clostridia|o__Clostridiales|f__Ruminococcaceae|g__Candidatus_Cibiobacter|s__Candidatus_Cibiobacter_qucibialis	1.96421	1.6508	2.85336	2.07859	1.28904	0.97446	0.83386	1.13893	0.64269	0.895091	0.12994	1.36758	0.90303	0.8034	0.47196	2.45986	0.10656	0.0170348
k__Bacteria|p__Firmicutes|c__Clostridia|o__Clostridiales|f__Lachnospiraceae|g__Enterocloster|s__Enterocloster_lavalensis	0	0	0	0	0	0	0.17059	1.10761	0	0	0.33468	1.41014	0	0.27514	0	0	0.62888	0
k__Bacteria|p__Firmicutes|c__Negativicutes|o__Acidaminococcales|f__Acidaminococcaceae|g__Phascolarctobacterium|s__Phascolarctobacterium_faecium	0	0	0.47707	0	1.19276	0	0.09966	1.09663	0	1.44334	0.90181	1.32224	0	0	2.61232	2.5859	0	0
k__Bacteria|p__Firmicutes|c__Clostridia|o__Clostridiales|f__Lachnospiraceae|g__Blautia|s__Blautia_obeum	2.7559	0.77447	1.14906	0	0.00451	0	0.31893	1.07196	0.06397	0.15677	0	0.09628	0	0	0	0	0	0
k__Bacteria|p__Proteobacteria|c__Gammaproteobacteria|o__Enterobacterales|f__Enterobacteriaceae|g__Raoultella|s__Raoultella_ornithinolytica	0	0	0	0	0	0	0	1.01447	0.23366	5.40118	0	3.39726	0	0	0	0	0	0
k__Bacteria|p__Actinobacteria|c__Actinobacteria|o__Bifidobacteriales|f__Bifidobacteriaceae|g__Bifidobacterium|s__Bifidobacterium_longum	0.76493	0	3.35584	4.73981	0.9107	0.47913	2.8864	0.978421	0.05254	0	9.42556	11.8993	7.7818	3.1744	4.76114	1.81447	2.60228	0.739385
k__Bacteria|p__Firmicutes|c__Negativicutes|o__Veillonellales|f__Veillonellaceae|g__Veillonella|s__Veillonella_parvula	0	0	0.3214	0	0	0	0	0.722554	0	0	0.83747	2.66482	0	0	0	0.45047	0.16493	2.08219
k__Bacteria|p__Firmicutes|c__Clostridia|o__Clostridiales|f__Clostridiaceae|g__Clostridium|s__Clostridium_sp_AF15_49	2.73771	0	0	0	0	0	0.32035	0.667377	0	0	0	0	0	0	0	0	0	0
k__Bacteria|p__Bacteroidetes|c__Bacteroidia|o__Bacteroidales|f__Rikenellaceae|g__Alistipes|s__Alistipes_putredinis	1.22639	0	3.76786	4.42603	0.16914	0.33108	0.77662	0.644796	0.04045	0	1.54056	0.69069	1.77643	0.58236	0.02512	0.01404	0.52866	0
k__Bacteria|p__Firmicutes|c__Negativicutes|o__Veillonellales|f__Veillonellaceae|g__Veillonella|s__Veillonella_atypica	0	0	0	0	0	0	0.80352	0.628226	0	0	0	0	0	0.29253	0	0	0.7168	0.961216
k__Bacteria|p__Firmicutes|c__Clostridia|o__Clostridiales|f__Ruminococcaceae|g__GGB9633|s__GGB9633_SGB15091	1.65549	0	0	1.49205	0	0	0.22413	0.610376	0	0	0	0	1.69543	1.05216	0	0	0	0
k__Bacteria|p__Firmicutes|c__Clostridia|o__Clostridiales|f__Lachnospiraceae|g__Blautia|s__Blautia_massiliensis	2.09137	0	0.11664	4.19136	0.65774	0.34755	0.36537	0.58924	0	0	0	0	1.53397	0.48711	0	0.11948	0	0
k__Bacteria|p__Firmicutes|c__Clostridia|o__Clostridiales|f__Lachnospiraceae|g__Blautia|s__Blautia_wexlerae	3.07456	4.67013	2.20231	1.99807	3.13845	1.33673	0.12668	0.469257	0.97571	0.78112	0.00924	0.07016	0.22824	0.11447	0	0.17501	0.23325	0.0206629
k__Bacteria|p__Bacteroidetes|c__Bacteroidia|o__Bacteroidales|f__Bacteroidales_unclassified|g__Phocaeicola|s__Phocaeicola_vulgatus	1.00774	4.41185	2.79486	2.03091	0.13755	0.86817	2.9704	0.430252	10.0048	0.108073	0.96523	0.06517	5.46243	0.05447	0.97085	0.06217	5.13642	0
k__Bacteria|p__Proteobacteria|c__Gammaproteobacteria|o__Enterobacterales|f__Enterobacteriaceae|g__Klebsiella|s__Klebsiella_michiganensis	0	0	0	0	0	0	0	0.425171	0	1.43097	0	0.01116	0	0.27016	0	0	0	0
k__Bacteria|p__Firmicutes|c__Firmicutes_unclassified|o__Firmicutes_unclassified|f__Firmicutes_unclassified|g__Firmicutes_unclassified|s__Firmicutes_bacterium_AF16_15	1.09261	0	0.48913	0	0	0.14519	0.31818	0.401504	0	0	0.07749	0.14616	0	0	0	0	0	0
k__Bacteria|p__Proteobacteria|c__Deltaproteobacteria|o__Desulfovibrionales|f__Desulfovibrionaceae|g__Bilophila|s__Bilophila_wadsworthia	0.06329	0.48603	0.09978	0.178	0.65366	0	0.03099	0.357651	0.66101	1.43559	0.07265	0.46161	0.40446	0.72421	0.40092	1.01482	0	0.243779
k__Bacteria|p__Firmicutes|c__Clostridia|o__Clostridiales|f__Lachnospiraceae|g__Lachnospira|s__Lachnospira_eligens	1.36255	0.55165	0.28297	0	0.67204	0	0.10409	0.315582	0.06173	0.0677635	0	0	0	0	0	0.0317	0	0
k__Bacteria|p__Firmicutes|c__Clostridia|o__Clostridiales|f__Lachnospiraceae|g__Lachnospiraceae_unclassified|s__Eubacterium_rectale	2.24064	0.60532	3.56619	0.66834	6.41506	5.81163	0	0.27201	0	0.0664189	0	0.17932	0	0	0	0.10675	0	0.0931861
k__Bacteria|p__Firmicutes|c__Clostridia|o__Clostridiales|f__Ruminococcaceae|g__Faecalibacterium|s__Faecalibacterium_SGB15346	1.59098	1.33482	0.65694	0.46962	0.72971	0.99896	0.13311	0.228321	0.06215	0.100511	0	0.09776	0	0.56789	0	0.12123	0	0
k__Bacteria|p__Firmicutes|c__Clostridia|o__Clostridiales|f__Lachnospiraceae|g__Enterocloster|s__Enterocloster_asparagiformis	0	0	0	0	0	0	0.08903	0.219935	0	0	0	0	0	0	0.18871	0.92316	0	0
k__Bacteria|p__Firmicutes|c__Clostridia|o__Clostridia_unclassified|f__Clostridia_unclassified|g__Clostridia_unclassified|s__Clostridia_bacterium	0.80654	0.01348	1.27723	1.5701	0.10349	0.1427	0.11245	0.210074	0	0	0.204	0.12947	0.94713	0.11965	0.27498	0.01483	1.12963	0
k__Bacteria|p__Firmicutes|c__CFGB1340|o__OFGB1340|f__FGB1340|g__GGB3256|s__GGB3256_SGB4303	1.06604	0	0	0	0	0.67604	0.10986	0.198459	0	0	0	0	0	0	0	0	0	0
k__Bacteria|p__Actinobacteria|c__Coriobacteriia|o__Coriobacteriales|f__Coriobacteriaceae|g__Collinsella|s__Collinsella_aerofaciens	0.63691	1.79944	0.77733	4.43619	0.17631	1.59094	2.10947	0.196491	5.34341	0.801744	1.88847	0.75952	0.93396	0.27304	0	0.22046	1.55674	1.28495
k__Bacteria|p__Firmicutes|c__Clostridia|o__Clostridiales|f__Lachnospiraceae|g__Dorea|s__Dorea_longicatena	0.72211	0	1.5546	1.27259	0.87079	0.57715	1.10098	0.196307	0	0	2.94954	0.01607	2.59459	0	0.74435	0.00092	0.82931	0
k__Bacteria|p__Firmicutes|c__Clostridia|o__Clostridiales|f__Lachnospiraceae|g__Anaerostipes|s__Anaerostipes_hadrus	0.67625	0	0.34057	0	0.50147	0.80948	0.05273	0.166919	0	0	0	0	0	0	0	0	0	0
k__Bacteria|p__Proteobacteria|c__Deltaproteobacteria|o__Desulfovibrionales|f__Desulfovibrionaceae|g__Desulfovibrio|s__Desulfovibrio_desulfuricans	0	0	0	0	0	0	0	0.163739	0	0	0	0	0	0	0	0	0	0
k__Bacteria|p__Firmicutes|c__Clostridia|o__Clostridiales|f__Lachnospiraceae|g__Lachnospiraceae_unclassified|s__Lachnospiraceae_bacterium	0.97228	0.39515	2.15873	0.86385	0.3346	0.51356	0.32033	0.160792	0.3243	0.139639	0.2193	0.07111	0	0	0.2705	0.01045	0.88549	0
k__Bacteria|p__Actinobacteria|c__Coriobacteriia|o__Eggerthellales|f__Eggerthellaceae|g__Eggerthellaceae_unclassified|s__Eggerthellaceae_bacterium	0.56667	0	0.28597	0	0	0.40172	0.18751	0.154325	0.0096	0	0.02255	0.04156	0	0	0	0.00221	0.01049	0.00311786
k__Bacteria|p__Firmicutes|c__Clostridia|o__Clostridiales|f__Lachnospiraceae|g__Enterocloster|s__Enterocloster_bolteae	0	0	0	0	0	0	0.17295	0.127846	1.60327	3.42201	0.34599	2.01401	0.3977	0.95169	0.91804	1.54654	0	0
k__Bacteria|p__Firmicutes|c__Clostridia|o__Clostridiales|f__Ruminococcaceae|g__Ruminococcaceae_unclassified|s__Ruminococcaceae_unclassified_SGB15234	0.31777	0	0	0.85387	0	0	0	0.121156	0	0	0	0	0.07058	0.3785	0	0	0	0
k__Bacteria|p__Firmicutes|c__Clostridia|o__Clostridiales|f__Clostridiaceae|g__Clostridium|s__Clostridium_phoceensis	0.07429	0	0.07627	0.10237	0.00624	0	0.58911	0.118655	0.17878	0.0291401	0.06582	0.07907	0.33988	0.15857	0	0.47321	0	0
k__Bacteria|p__Bacteroidetes|c__Bacteroidia|o__Bacteroidales|f__Bacteroidales_unclassified|g__Phocaeicola|s__Phocaeicola_dorei	0.38053	0.3522	1.55634	0	0.30766	0	3.24212	0.111829	1.81391	0	2.25484	0.04012	0	0	2.30313	0.00395	0	0
k__Bacteria|p__Firmicutes|c__Clostridia|o__Clostridia_unclassified|f__Clostridia_unclassified|g__GGB9758|s__GGB9758_SGB15368	0.26204	0.1303	2.17998	0.29675	0	0	0.06174	0.110055	0.08328	0.0756533	0.60381	1.05481	0.14714	0.11155	0	0	0	0
k__Bacteria|p__Bacteroidetes|c__Bacteroidia|o__Bacteroidales|f__Bacteroidales_unclassified|g__Phocaeicola|s__Phocaeicola_massiliensis	0.56157	0	0.18003	0.22369	0	0.31964	1.32146	0.104829	0.4882	0	0.03531	0	0.28617	0	0	0	1.6416	0
k__Bacteria|p__Actinobacteria|c__Coriobacteriia|o__Eggerthellales|f__Eggerthellaceae|g__Slackia|s__Slackia_isoflavoniconvertens	0.31502	0	0	0.31233	0	0	0.23964	0.0867949	0	0	0	0	0.82379	0	0	0	0	0
k__Bacteria|p__Firmicutes|c__Clostridia|o__Clostridiales|f__Ruminococcaceae|g__Ruminococcaceae_unclassified|s__Ruminococcaceae_unclassified_SGB15260	0.35362	0	0	0	0	0	0.06052	0.0796978	0	0	0	0	0	0	0.06116	0.00607	0	0
k__Bacteria|p__Firmicutes|c__Clostridia|o__Clostridiales|f__Oscillospiraceae|g__Oscillibacter|s__Oscillibacter_sp_ER4	0.44347	0.24644	1.58917	1.32794	0.63777	0.08792	0.32472	0.0778265	0.36738	0	0.96804	0.38424	2.13876	0.28778	1.18994	0.01497	0.38271	0
k__Bacteria|p__Firmicutes|c__Clostridia|o__Clostridiales|f__Ruminococcaceae|g__GGB9615|s__GGB9615_SGB15053	0.69322	0.16234	0.05197	0	0	0	0.03151	0.0761201	0.21494	0	0	0	0	0	0	0	0	0
k__Bacteria|p__Bacteroidetes|c__Bacteroidia|o__Bacteroidales|f__Tannerellaceae|g__Parabacteroides|s__Parabacteroides_distasonis	0.45076	0	0.31378	0.47667	1.03099	0.2301	2.22541	0.0718928	0.22559	0	1.82777	0	1.32516	0	3.08294	0.09308	3.88749	0
k__Bacteria|p__Firmicutes|c__Clostridia|o__Clostridiales|f__Lachnospiraceae|g__Mediterraneibacter|s__Ruminococcus_torques	0.16744	0.38923	0.37968	0	1.84484	0.96659	0.26411	0.0673262	0.35785	0.0444074	0	0.03365	0	0	1.40374	0.13487	0.56885	0
k__Bacteria|p__Actinobacteria|c__Coriobacteriia|o__Eggerthellales|f__Eggerthellaceae|g__Adlercreutzia|s__Adlercreutzia_equolifaciens	0.15141	0	0.35591	0.10169	0.0899	0	0.12508	0.0644369	0	0	0.43757	0.12878	0	0	0	0.04634	0	0
k__Bacteria|p__Firmicutes|c__Clostridia|o__Clostridiales|f__Lachnospiraceae|g__Faecalicatena|s__Faecalicatena_fissicatena	0.24904	0.08432	0.20964	0	0	0.11113	0	0.0643303	0.01493	0	0	0	0	0	0	0	0	0
k__Bacteria|p__Bacteroidetes|c__Bacteroidia|o__Bacteroidales|f__Prevotellaceae|g__Prevotella|s__Prevotella_lascolaii	1.18684	0	0	0	0	0	0.45497	0.0626917	0	0	0	0	0	0	0	0	0	0
k__Bacteria|p__Firmicutes|c__Clostridia|o__Clostridiales|f__Oscillospiraceae|g__Dysosmobacter|s__Dysosmobacter_welbionis	0.0603	0.06197	0	0.65264	0.05184	0	1.57181	0.0612374	1.56142	0.144897	1.04813	0	1.59093	0.63594	1.13528	0.96661	0.11021	0
k__Bacteria|p__Actinobacteria|c__Coriobacteriia|o__Coriobacteriia_unclassified|f__Coriobacteriia_unclassified|g__Coriobacteriia_unclassified|s__Coriobacteriia_unclassified_SGB14764	0.16369	0	0	0	0	0.5303	0.01969	0.0591431	0	0	0	0	0	0	0	0	0.01964	0.1075
k__Bacteria|p__Firmicutes|c__Negativicutes|o__Acidaminococcales|f__Acidaminococcaceae|g__Acidaminococcaceae_unclassified|s__Acidaminococcaceae_unclassified_SGB5785	0.45543	0	0	0.77498	0	0.27585	0.03751	0.0575433	0	0	0	0	0.0166	0	0	0	0	0
k__Bacteria|p__Firmicutes|c__Clostridia|o__Clostridiales|f__Clostridiales_unclassified|g__Clostridiales_unclassified|s__Clostridiales_bacterium_KLE1615	1.26862	0.98137	2.38433	0	0.74255	0.33224	0	0.0513769	0	0.00751268	0.07456	0.14461	0	0	0	0	0	0
k__Bacteria|p__Proteobacteria|c__Gammaproteobacteria|o__Enterobacterales|f__Enterobacteriaceae|g__Enterobacter|s__Enterobacter_mori	0	0	0	0	0	0	0	0.0511733	0	0	0	0	0	0	0	0	0	0
k__Bacteria|p__Firmicutes|c__Clostridia|o__Clostridiales|f__Ruminococcaceae|g__Agathobaculum|s__Agathobaculum_butyriciproducens	0.60055	0	0.08627	0.02332	0.82219	0.34463	0	0.0497093	0	0	0.07005	0	0	0	0	2.38753	0	0
k__Bacteria|p__Firmicutes|c__Clostridia|o__Clostridiales|f__Lachnospiraceae|g__Mediterraneibacter|s__Ruminococcus_lactaris	0.18017	0	0	0	0.75294	0.54396	0	0.0488755	0	0	0	0	0	0	0	0.04065	0	0.00857883
k__Bacteria|p__Firmicutes|c__Clostridia|o__Clostridiales|f__Clostridiaceae|g__Clostridium|s__Clostridium_sp_AF34_10BH	0.40555	5.24639	0.03461	0	0.34932	0	0	0.0449003	0	0	0	0	0	0	0	0	0	0
k__Bacteria|p__Bacteroidetes|c__Bacteroidia|o__Bacteroidales|f__Bacteroidaceae|g__Bacteroides|s__Bacteroides_uniformis	1.40182	0.80357	4.56487	7.2363	1.91837	1.09479	4.38921	0.0245395	8.66697	0	10.2247	1.53	7.75902	1.52125	9.87237	0.16649	2.73355	0
k__Bacteria|p__Firmicutes|c__Clostridia|o__Clostridiales|f__Clostridiaceae|g__GGB3478|s__GGB3478_SGB4643	0.50375	0	0.29246	0	0	0	0	0.0194397	0	0	0	0	0	0	0	0	0	0
k__Bacteria|p__Bacteroidetes|c__Bacteroidia|o__Bacteroidales|f__Rikenellaceae|g__Alistipes|s__Alistipes_communis	0.41471	0	0.1689	0.42217	0	0	0.32975	0.0191585	0	0	0.09113	0	0.24237	0	0	0	0.24061	0
k__Bacteria|p__Firmicutes|c__Clostridia|o__Clostridiales|f__Lachnospiraceae|g__Anaerobutyricum|s__Anaerobutyricum_hallii	0.3736	0.37974	0.79425	0.5599	0.526	0.39785	0.08865	0.0176654	0	0	0	0	0.01276	0	0	0	0	0
k__Bacteria|p__Firmicutes|c__Clostridia|o__Clostridiales|f__Lachnospiraceae|g__Eisenbergiella|s__Eisenbergiella_tayi	0	0	0	0	0	0	0	0.0142622	0	0	0	1.15725	0.12245	2.23028	0	1.41255	0.32308	0
k__Bacteria|p__Firmicutes|c__Clostridia|o__Clostridiales|f__Clostridiales_unclassified|g__Clostridiales_unclassified|s__Clostridiales_bacterium	0	0	0	0.00583	0	0	0.00253	0.0123231	0.00496	0	0.07866	0	0.03902	0.07123	0.14771	1.21498	0.01158	0
k__Bacteria|p__Proteobacteria|c__Gammaproteobacteria|o__Enterobacterales|f__Enterobacteriaceae|g__Kluyvera|s__Kluyvera_cryocrescens	0	0	0	0	0	0	0	0.0110821	0	0	0	0	0	0	0	0	0	0
k__Bacteria|p__Firmicutes|c__Clostridia|o__Clostridiales|f__Clostridiales_unclassified|g__Evtepia|s__Evtepia_gabavorous	0.11842	0.30006	0	0	0.09932	0	1.13085	0.00937564	1.05209	0	0	0	0	0	0.26861	0.01014	0	0
k__Bacteria|p__Bacteroidetes|c__Bacteroidia|o__Bacteroidales|f__Bacteroidaceae|g__Bacteroides|s__Bacteroides_stercoris	0.60704	0	0	0.49612	3.84024	0	1.87639	0.00830912	1.08346	0	0	0	0.92921	0	10.1383	0.02845	0	0
k__Bacteria|p__Firmicutes|c__Clostridia|o__Clostridiales|f__Lachnospiraceae|g__Blautia|s__Blautia_SGB4815	0.013	0.01938	0.14758	0.02522	0	0	0.13531	0.00652513	0.06399	0.0312246	0.01594	0	0	0	0	0	0	0
k__Bacteria|p__Firmicutes|c__Clostridia|o__Clostridiales|f__Lachnospiraceae|g__GGB3746|s__GGB3746_SGB5089	0.20809	0.06557	0	0	0	2.07003	0	0.00363585	0	0	0	0	0	0	0	0	0	0.00552711
k__Bacteria|p__Firmicutes|c__Clostridia|o__Clostridiales|f__Lachnospiraceae|g__Lacrimispora|s__Lacrimispora_amygdalina	0.24831	0.43129	0	0.06979	0.72027	0.40382	1.11768	0.00312198	0.07747	0	0.10109	0	0.47981	0	0.88255	0.08714	3.19026	0
k__Bacteria|p__Firmicutes|c__Clostridia|o__Clostridiales|f__Lachnospiraceae|g__Coprococcus|s__Coprococcus_comes	0.18058	0	0.36497	0.44764	0.61586	0.41849	0	0.00257903	0	0	0	0.01368	0.15122	0	0	0.05515	0	0
k__Bacteria|p__Proteobacteria|c__Alphaproteobacteria|o__Rhodobacterales|f__Rhodobacteraceae|g__Rhodobacteraceae_unclassified|s__Rhodobacteraceae_unclassified_SGB53807	0	0	0	0	0	0	0.22145	0.00234633	0	0	0	0	0	0	0	0	0	0
k__Bacteria|p__Proteobacteria|c__CFGB2397|o__OFGB2397|f__FGB2397|g__GGB6561|s__GGB6561_SGB9269	0	0	0	0	0	0	0.06799	0.00210394	0	0	0	0	0	0	0	0	0	0
k__Bacteria|p__Bacteroidetes|c__Bacteroidia|o__Bacteroidales|f__Rikenellaceae|g__Alistipes|s__Alistipes_shahii	0	0	0.61376	0.02029	0.02444	0	0.44226	0.00122164	1.45251	0	1.01899	0.15813	1.68279	0	1.00795	0.06604	0.13968	0
k__Bacteria|p__Firmicutes|c__Clostridia|o__Clostridiales|f__Eubacteriaceae|g__Intestinibacillus|s__Intestinibacillus_massiliensis	0	0	0	0	0	0	0	0.000552649	0	0	0	0	0	0.10539	0	0	0	0
k__Bacteria|p__Proteobacteria|c__Gammaproteobacteria|o__Enterobacterales|f__Enterobacteriaceae|g__Escherichia|s__Escherichia_coli|t__SGB10068	0	0	0	1.36562	0	0	13.6621	46.702	0	0	10.2834	29.6769	17.3596	62.8771	7.95693	69.1869	25.4241	69.5051
k__Bacteria|p__Proteobacteria|c__Gammaproteobacteria|o__Enterobacterales|f__Enterobacteriaceae|g__Klebsiella|s__Klebsiella_pneumoniae|t__SGB10115	0	0	0	0	0	0	0	8.52407	0	0	0	0.84976	0	0	0	0	0	0
k__Bacteria|p__Proteobacteria|c__Gammaproteobacteria|o__Enterobacterales|f__Enterobacteriaceae|g__Citrobacter|s__Citrobacter_freundii|t__SGB10083_group	0	0	0	0	0	0	0	6.48169	5.40016	46.6835	0	0.00527	0	0	0	0	0	0
k__Bacteria|p__Actinobacteria|c__Actinobacteria|o__Bifidobacteriales|f__Bifidobacteriaceae|g__Bifidobacterium|s__Bifidobacterium_adolescentis|t__SGB17244	4.82281	1.04552	1.30717	3.94353	2.7712	4.16908	18.2821	4.81417	21.6256	1.17352	9.07399	3.57382	7.833	3.62865	10.0781	1.68756	17.5526	14.2416
k__Bacteria|p__Firmicutes|c__Clostridia|o__Clostridiales|f__Ruminococcaceae|g__Ruminococcus|s__Ruminococcus_bromii|t__SGB4285_group	9.66737	0	0	1.20233	0	2.35997	4.80509	3.95045	0	0	0	0	1.15067	0.10107	0	0	0.03436	0.214669
k__Bacteria|p__Firmicutes|c__Clostridia|o__Clostridiales|f__Ruminococcaceae|g__Gemmiger|s__Gemmiger_formicilis|t__SGB15300	6.29539	1.75079	5.21643	7.00608	3.30818	2.12322	2.48527	2.52202	0.33945	0.61101	1.9876	1.22443	4.37493	2.1092	3.70295	0.69201	0.18641	0.16262
k__Bacteria|p__Firmicutes|c__Clostridia|o__Clostridiales|f__Lachnospiraceae|g__Roseburia|s__Roseburia_faecis|t__SGB4925	9.1995	0.74731	1.85644	3.28796	0	10.9501	1.46006	2.00355	0.03406	0.128918	0	0	0.11872	0.10033	0	0	0.01629	0.0943482
k__Bacteria|p__Firmicutes|c__Clostridia|o__Clostridiales|f__Ruminococcaceae|g__Faecalibacterium|s__Faecalibacterium_prausnitzii|t__SGB15342	0.92986	2.64184	4.65377	10.9112	0.10006	1.94311	0.11867	1.49026	0.01069	0.0365959	0.45498	2.57575	2.10326	7.70958	0	0.02363	0	0
k__Bacteria|p__Firmicutes|c__Clostridia|o__Clostridiales|f__Ruminococcaceae|g__Ruminococcus|s__Ruminococcus_bicirculans|t__SGB4262	3.06983	0	8.76404	0.37143	0	0	0.47225	1.42411	0	0	0.02387	0.45287	0	0	0	0	0	0
k__Bacteria|p__Firmicutes|c__Clostridia|o__Clostridiales|f__Lachnospiraceae|g__Enterocloster|s__Enterocloster_clostridioformis|t__SGB4760	0	0	0	0	0	0	0.42733	1.36574	0	0	0	0	0.41036	0.42792	0	0	0	0
k__Bacteria|p__Firmicutes|c__Clostridia|o__Clostridiales|f__Ruminococcaceae|g__Candidatus_Cibiobacter|s__Candidatus_Cibiobacter_qucibialis|t__SGB15286	1.96421	1.6508	2.85336	2.07859	1.28904	0.97446	0.83386	1.13893	0.64269	0.895091	0.12994	1.36758	0.90303	0.8034	0.47196	2.45986	0.10656	0.0170348
k__Bacteria|p__Firmicutes|c__Clostridia|o__Clostridiales|f__Lachnospiraceae|g__Enterocloster|s__Enterocloster_lavalensis|t__SGB4725	0	0	0	0	0	0	0.17059	1.10761	0	0	0.33468	1.41014	0	0.27514	0	0	0.62888	0
k__Bacteria|p__Firmicutes|c__Negativicutes|o__Acidaminococcales|f__Acidaminococcaceae|g__Phascolarctobacterium|s__Phascolarctobacterium_faecium|t__SGB5792	0	0	0.47707	0	1.19276	0	0.09966	1.09663	0	1.44334	0.90181	1.32224	0	0	2.61232	2.5859	0	0
k__Bacteria|p__Firmicutes|c__Clostridia|o__Clostridiales|f__Lachnospiraceae|g__Blautia|s__Blautia_obeum|t__SGB4811_group	2.72098	0.07621	1.14906	0	0.00451	0	0.31893	1.06867	0	0.0168751	0	0.09628	0	0	0	0	0	0
k__Bacteria|p__Proteobacteria|c__Gammaproteobacteria|o__Enterobacterales|f__Enterobacteriaceae|g__Raoultella|s__Raoultella_ornithinolytica|t__SGB10124	0	0	0	0	0	0	0	1.01447	0.23366	5.40118	0	3.39726	0	0	0	0	0	0
k__Bacteria|p__Actinobacteria|c__Actinobacteria|o__Bifidobacteriales|f__Bifidobacteriaceae|g__Bifidobacterium|s__Bifidobacterium_longum|t__SGB17248	0.76493	0	3.35584	4.73981	0.9107	0.47913	2.8864	0.978421	0.05254	0	9.42556	11.8993	7.7818	3.1744	4.76114	1.81447	2.60228	0.739385
k__Bacteria|p__Firmicutes|c__Clostridia|o__Clostridiales|f__Ruminococcaceae|g__Faecalibacterium|s__Faecalibacterium_prausnitzii|t__SGB15318_group	5.7971	1.54987	0.94098	1.00705	10.3151	0.43998	0.35858	0.766844	0.07002	0.146675	0	1.76009	0.01862	0.35744	0.4267	2.33387	0	0
k__Bacteria|p__Firmicutes|c__Negativicutes|o__Veillonellales|f__Veillonellaceae|g__Veillonella|s__Veillonella_parvula|t__SGB6939	0	0	0.3214	0	0	0	0	0.722554	0	0	0.83747	2.66482	0	0	0	0.45047	0.16493	2.08219
k__Bacteria|p__Firmicutes|c__Clostridia|o__Clostridiales|f__Clostridiaceae|g__Clostridium|s__Clostridium_sp_AF15_49|t__SGB5111	2.73771	0	0	0	0	0	0.32035	0.667377	0	0	0	0	0	0	0	0	0	0
k__Bacteria|p__Bacteroidetes|c__Bacteroidia|o__Bacteroidales|f__Rikenellaceae|g__Alistipes|s__Alistipes_putredinis|t__SGB2318	1.22639	0	3.76786	4.42603	0.16914	0.33108	0.77662	0.644796	0.04045	0	1.54056	0.69069	1.77643	0.58236	0.02512	0.01404	0.52866	0
k__Bacteria|p__Firmicutes|c__Negativicutes|o__Veillonellales|f__Veillonellaceae|g__Veillonella|s__Veillonella_atypica|t__SGB6936	0	0	0	0	0	0	0.80352	0.628226	0	0	0	0	0	0.29253	0	0	0.7168	0.961216
k__Bacteria|p__Firmicutes|c__Clostridia|o__Clostridiales|f__Ruminococcaceae|g__GGB9633|s__GGB9633_SGB15091|t__SGB15091	1.65549	0	0	1.49205	0	0	0.22413	0.610376	0	0	0	0	1.69543	1.05216	0	0	0	0
k__Bacteria|p__Firmicutes|c__Clostridia|o__Clostridiales|f__Lachnospiraceae|g__Blautia|s__Blautia_massiliensis|t__SGB4826_group	2.09137	0	0.11664	4.19136	0.65774	0.34755	0.36537	0.58924	0	0	0	0	1.53397	0.48711	0	0.11948	0	0
k__Bacteria|p__Firmicutes|c__Clostridia|o__Clostridiales|f__Lachnospiraceae|g__Blautia|s__Blautia_wexlerae|t__SGB4837_group	3.07456	4.67013	2.20231	1.99807	3.13845	1.33673	0.12668	0.469257	0.97571	0.78112	0.00924	0.07016	0.22824	0.11447	0	0.17501	0.23325	0.0206629
k__Bacteria|p__Bacteroidetes|c__Bacteroidia|o__Bacteroidales|f__Bacteroidales_unclassified|g__Phocaeicola|s__Phocaeicola_vulgatus|t__SGB1814	1.00774	4.41185	2.79486	2.03091	0.13755	0.86817	2.9704	0.430252	10.0048	0.108073	0.96523	0.06517	5.46243	0.05447	0.97085	0.06217	5.13642	0
k__Bacteria|p__Proteobacteria|c__Gammaproteobacteria|o__Enterobacterales|f__Enterobacteriaceae|g__Klebsiella|s__Klebsiella_michiganensis|t__SGB10119	0	0	0	0	0	0	0	0.425171	0	1.43097	0	0.01116	0	0.27016	0	0	0	0
k__Bacteria|p__Firmicutes|c__Firmicutes_unclassified|o__Firmicutes_unclassified|f__Firmicutes_unclassified|g__Firmicutes_unclassified|s__Firmicutes_bacterium_AF16_15|t__SGB4993	1.09261	0	0.48913	0	0	0.14519	0.31818	0.401504	0	0	0.07749	0.14616	0	0	0	0	0	0
k__Bacteria|p__Proteobacteria|c__Deltaproteobacteria|o__Desulfovibrionales|f__Desulfovibrionaceae|g__Bilophila|s__Bilophila_wadsworthia|t__SGB15452	0.06329	0.48603	0.09978	0.178	0.65366	0	0.03099	0.357651	0.66101	1.43559	0.07265	0.46161	0.40446	0.72421	0.40092	1.01482	0	0.243779
k__Bacteria|p__Firmicutes|c__Clostridia|o__Clostridiales|f__Lachnospiraceae|g__Lachnospira|s__Lachnospira_eligens|t__SGB5082_group	1.36255	0.55165	0.28297	0	0.67204	0	0.10409	0.315582	0.06173	0.0677635	0	0	0	0	0	0.0317	0	0
k__Bacteria|p__Firmicutes|c__Clostridia|o__Clostridiales|f__Lachnospiraceae|g__Lachnospiraceae_unclassified|s__Eubacterium_rectale|t__SGB4933_group	2.24064	0.60532	3.56619	0.66834	6.41506	5.81163	0	0.27201	0	0.0664189	0	0.17932	0	0	0	0.10675	0	0.0931861
k__Bacteria|p__Firmicutes|c__Clostridia|o__Clostridiales|f__Ruminococcaceae|g__Faecalibacterium|s__Faecalibacterium_SGB15346|t__SGB15346	1.59098	1.33482	0.65694	0.46962	0.72971	0.99896	0.13311	0.228321	0.06215	0.100511	0	0.09776	0	0.56789	0	0.12123	0	0
k__Bacteria|p__Firmicutes|c__Clostridia|o__Clostridiales|f__Lachnospiraceae|g__Enterocloster|s__Enterocloster_asparagiformis|t__SGB4724	0	0	0	0	0	0	0.08903	0.219935	0	0	0	0	0	0	0.18871	0.92316	0	0
k__Bacteria|p__Firmicutes|c__CFGB1340|o__OFGB1340|f__FGB1340|g__GGB3256|s__GGB3256_SGB4303|t__SGB4303	1.06604	0	0	0	0	0.67604	0.10986	0.198459	0	0	0	0	0	0	0	0	0	0
k__Bacteria|p__Actinobacteria|c__Coriobacteriia|o__Coriobacteriales|f__Coriobacteriaceae|g__Collinsella|s__Collinsella_aerofaciens|t__SGB14546_group	0.63691	1.79944	0.77733	4.43619	0.17631	1.59094	2.10947	0.196491	5.34341	0.801744	1.88847	0.75952	0.93396	0.27304	0	0.22046	1.55674	1.28495
k__Bacteria|p__Firmicutes|c__Clostridia|o__Clostridiales|f__Lachnospiraceae|g__Dorea|s__Dorea_longicatena|t__SGB4581	0.72211	0	1.5546	1.21789	0	0.40698	1.10098	0.196307	0	0	2.94954	0.01607	2.09859	0	0	0	0.00268	0
k__Bacteria|p__Firmicutes|c__Clostridia|o__Clostridiales|f__Lachnospiraceae|g__Anaerostipes|s__Anaerostipes_hadrus|t__SGB4540_group	0.67625	0	0.34057	0	0.50147	0.80948	0.05273	0.166919	0	0	0	0	0	0	0	0	0	0
k__Bacteria|p__Proteobacteria|c__Deltaproteobacteria|o__Desulfovibrionales|f__Desulfovibrionaceae|g__Desulfovibrio|s__Desulfovibrio_desulfuricans|t__SGB15463	0	0	0	0	0	0	0	0.163739	0	0	0	0	0	0	0	0	0	0
k__Bacteria|p__Actinobacteria|c__Coriobacteriia|o__Eggerthellales|f__Eggerthellaceae|g__Eggerthellaceae_unclassified|s__Eggerthellaceae_bacterium|t__SGB14328	0.56667	0	0	0	0	0	0.18751	0.154325	0	0	0	0	0	0	0	0	0	0
k__Bacteria|p__Firmicutes|c__Clostridia|o__Clostridia_unclassified|f__Clostridia_unclassified|g__Clostridia_unclassified|s__Clostridia_bacterium|t__SGB14861	0.62655	0.01348	0.70316	1.12606	0.10349	0.1427	0.01982	0.138579	0	0	0	0.08231	0.45051	0.04826	0	0.00967	0	0
k__Bacteria|p__Firmicutes|c__Clostridia|o__Clostridiales|f__Lachnospiraceae|g__Enterocloster|s__Enterocloster_bolteae|t__SGB4758_group	0	0	0	0	0	0	0.17295	0.127846	1.60327	3.42201	0.34599	2.01401	0.3977	0.95169	0.91804	1.54654	0	0
k__Bacteria|p__Firmicutes|c__Clostridia|o__Clostridiales|f__Ruminococcaceae|g__Ruminococcaceae_unclassified|s__Ruminococcaceae_unclassified_SGB15234|t__SGB15234	0.31777	0	0	0.85387	0	0	0	0.121156	0	0	0	0	0.07058	0.3785	0	0	0	0
k__Bacteria|p__Firmicutes|c__Clostridia|o__Clostridiales|f__Clostridiaceae|g__Clostridium|s__Clostridium_phoceensis|t__SGB15154	0.07429	0	0.07627	0.10237	0.00624	0	0.58911	0.118655	0.17878	0.0291401	0.06582	0.07907	0.33988	0.15857	0	0.47321	0	0
k__Bacteria|p__Bacteroidetes|c__Bacteroidia|o__Bacteroidales|f__Bacteroidales_unclassified|g__Phocaeicola|s__Phocaeicola_dorei|t__SGB1815	0.38053	0.3522	1.55634	0	0.30766	0	3.24212	0.111829	1.81391	0	2.25484	0.04012	0	0	2.30313	0.00395	0	0
k__Bacteria|p__Firmicutes|c__Clostridia|o__Clostridia_unclassified|f__Clostridia_unclassified|g__GGB9758|s__GGB9758_SGB15368|t__SGB15368	0.26204	0.1303	2.17998	0.29675	0	0	0.06174	0.110055	0.08328	0.0756533	0.60381	1.05481	0.14714	0.11155	0	0	0	0
k__Bacteria|p__Firmicutes|c__Clostridia|o__Clostridiales|f__Ruminococcaceae|g__Faecalibacterium|s__Faecalibacterium_prausnitzii|t__SGB15332_group	0.50351	0.61867	3.17181	3.30654	1.67824	5.15077	0	0.108125	0	0	0.01219	0.0127	0.09451	0.0828	0	0.3151	0.65127	0.0278151
k__Bacteria|p__Bacteroidetes|c__Bacteroidia|o__Bacteroidales|f__Bacteroidales_unclassified|g__Phocaeicola|s__Phocaeicola_massiliensis|t__SGB1812	0.56157	0	0.18003	0.22369	0	0.31964	1.32146	0.104829	0.4882	0	0.03531	0	0.28617	0	0	0	1.6416	0
k__Bacteria|p__Actinobacteria|c__Coriobacteriia|o__Eggerthellales|f__Eggerthellaceae|g__Slackia|s__Slackia_isoflavoniconvertens|t__SGB14773_group	0.31502	0	0	0.31233	0	0	0.23964	0.0867949	0	0	0	0	0.82379	0	0	0	0	0
k__Bacteria|p__Firmicutes|c__Clostridia|o__Clostridiales|f__Ruminococcaceae|g__Ruminococcaceae_unclassified|s__Ruminococcaceae_unclassified_SGB15260|t__SGB15260	0.35362	0	0	0	0	0	0.06052	0.0796978	0	0	0	0	0	0	0.06116	0.00607	0	0
k__Bacteria|p__Firmicutes|c__Clostridia|o__Clostridiales|f__Oscillospiraceae|g__Oscillibacter|s__Oscillibacter_sp_ER4|t__SGB15254	0.44347	0.24644	1.58917	1.32794	0.63777	0.08792	0.32472	0.0778265	0.36738	0	0.96804	0.38424	2.13876	0.28778	1.18994	0.01497	0.38271	0
k__Bacteria|p__Firmicutes|c__Clostridia|o__Clostridiales|f__Ruminococcaceae|g__GGB9615|s__GGB9615_SGB15053|t__SGB15053_group	0.69322	0.16234	0.05197	0	0	0	0.03151	0.0761201	0.21494	0	0	0	0	0	0	0	0	0
k__Bacteria|p__Bacteroidetes|c__Bacteroidia|o__Bacteroidales|f__Tannerellaceae|g__Parabacteroides|s__Parabacteroides_distasonis|t__SGB1934	0.45076	0	0.31378	0.47667	1.03099	0.2301	2.22541	0.0718928	0.22559	0	1.82777	0	1.32516	0	3.08294	0.09308	3.88749	0
k__Bacteria|p__Firmicutes|c__Clostridia|o__Clostridia_unclassified|f__Clostridia_unclassified|g__Clostridia_unclassified|s__Clostridia_bacterium|t__SGB15373	0.17999	0	0.08778	0	0	0	0	0.0714953	0	0	0	0.04717	0	0	0	0	0	0
k__Bacteria|p__Firmicutes|c__Clostridia|o__Clostridiales|f__Lachnospiraceae|g__Mediterraneibacter|s__Ruminococcus_torques|t__SGB4563_group	0.16744	0.38923	0.37968	0	1.84484	0.96659	0.11111	0.0673262	0.1592	0.0444074	0	0.03365	0	0	1.40374	0.13487	0.56885	0
k__Bacteria|p__Firmicutes|c__Clostridia|o__Clostridiales|f__Lachnospiraceae|g__Lachnospiraceae_unclassified|s__Lachnospiraceae_bacterium|t__SGB4767	0.25175	0.38027	0.18068	0.00899	0.07876	0.03216	0	0.067142	0	0.00166474	0	0	0	0	0	0	0	0
k__Bacteria|p__Actinobacteria|c__Coriobacteriia|o__Eggerthellales|f__Eggerthellaceae|g__Adlercreutzia|s__Adlercreutzia_equolifaciens|t__SGB14797_group	0.15141	0	0.35591	0.10169	0.0899	0	0.12508	0.0644369	0	0	0.43757	0.12878	0	0	0	0.04634	0	0
k__Bacteria|p__Firmicutes|c__Clostridia|o__Clostridiales|f__Lachnospiraceae|g__Faecalicatena|s__Faecalicatena_fissicatena|t__SGB4871_group	0.24904	0.08432	0.20964	0	0	0.11113	0	0.0643303	0.01493	0	0	0	0	0	0	0	0	0
k__Bacteria|p__Bacteroidetes|c__Bacteroidia|o__Bacteroidales|f__Prevotellaceae|g__Prevotella|s__Prevotella_lascolaii|t__SGB1585	1.18684	0	0	0	0	0	0.45497	0.0626917	0	0	0	0	0	0	0	0	0	0
k__Bacteria|p__Firmicutes|c__Clostridia|o__Clostridiales|f__Oscillospiraceae|g__Dysosmobacter|s__Dysosmobacter_welbionis|t__SGB15078	0.0603	0.06197	0	0.65264	0.05184	0	1.57181	0.0612374	1.56142	0.144897	1.04813	0	1.59093	0.63594	1.13528	0.96661	0.11021	0
k__Bacteria|p__Actinobacteria|c__Coriobacteriia|o__Coriobacteriia_unclassified|f__Coriobacteriia_unclassified|g__Coriobacteriia_unclassified|s__Coriobacteriia_unclassified_SGB14764|t__SGB14764	0.16369	0	0	0	0	0.5303	0.01969	0.0591431	0	0	0	0	0	0	0	0	0.01964	0.1075
k__Bacteria|p__Firmicutes|c__Negativicutes|o__Acidaminococcales|f__Acidaminococcaceae|g__Acidaminococcaceae_unclassified|s__Acidaminococcaceae_unclassified_SGB5785|t__SGB5785	0.45543	0	0	0.77498	0	0.27585	0.03751	0.0575433	0	0	0	0	0.0166	0	0	0	0	0
k__Bacteria|p__Firmicutes|c__Clostridia|o__Clostridiales|f__Clostridiales_unclassified|g__Clostridiales_unclassified|s__Clostridiales_bacterium_KLE1615|t__SGB5090_group	1.26862	0.98137	2.38433	0	0.74255	0.33224	0	0.0513769	0	0.00751268	0.07456	0.14461	0	0	0	0	0	0
k__Bacteria|p__Proteobacteria|c__Gammaproteobacteria|o__Enterobacterales|f__Enterobacteriaceae|g__Enterobacter|s__Enterobacter_mori|t__SGB10132	0	0	0	0	0	0	0	0.0511733	0	0	0	0	0	0	0	0	0	0
k__Bacteria|p__Firmicutes|c__Clostridia|o__Clostridiales|f__Lachnospiraceae|g__Lachnospiraceae_unclassified|s__Lachnospiraceae_bacterium|t__SGB4780	0.1954	0.01488	0.02863	0.25054	0.07509	0.13882	0	0.0510376	0	0	0	0	0	0	0	0	0	0
k__Bacteria|p__Firmicutes|c__Clostridia|o__Clostridiales|f__Ruminococcaceae|g__Agathobaculum|s__Agathobaculum_butyriciproducens|t__SGB14993_group	0.60055	0	0.08627	0.02332	0.82219	0.34463	0	0.0497093	0	0	0.07005	0	0	0	0	2.38753	0	0
k__Bacteria|p__Firmicutes|c__Clostridia|o__Clostridiales|f__Lachnospiraceae|g__Mediterraneibacter|s__Ruminococcus_lactaris|t__SGB4557	0.18017	0	0	0	0.75294	0.54396	0	0.0488755	0	0	0	0	0	0	0	0.04065	0	0.00857883
k__Bacteria|p__Firmicutes|c__Clostridia|o__Clostridiales|f__Clostridiaceae|g__Clostridium|s__Clostridium_sp_AF34_10BH|t__SGB4914	0.40555	5.24639	0.03461	0	0.34932	0	0	0.0449003	0	0	0	0	0	0	0	0	0	0
k__Bacteria|p__Firmicutes|c__Clostridia|o__Clostridiales|f__Lachnospiraceae|g__Lachnospiraceae_unclassified|s__Lachnospiraceae_bacterium|t__SGB4669	0.25375	0	0.30848	0	0.18076	0	0	0.0426121	0	0	0	0	0	0	0.2705	0.01045	0	0
k__Bacteria|p__Firmicutes|c__Clostridia|o__Clostridiales|f__Ruminococcaceae|g__Faecalibacterium|s__Faecalibacterium_prausnitzii|t__SGB15316_group	5.91834	1.25647	3.14046	0.04812	0	0.53138	0.02537	0.0377546	0.02349	0.00441797	0.2482	0.1882	0	0	0	0	0	0
k__Bacteria|p__Bacteroidetes|c__Bacteroidia|o__Bacteroidales|f__Bacteroidaceae|g__Bacteroides|s__Bacteroides_uniformis|t__SGB1836_group	1.40182	0.80357	4.56487	7.2363	1.91837	1.09479	4.38921	0.0245395	8.66697	0	10.2247	1.53	7.75902	1.52125	9.87237	0.16649	2.73355	0
k__Bacteria|p__Firmicutes|c__Clostridia|o__Clostridiales|f__Clostridiaceae|g__GGB3478|s__GGB3478_SGB4643|t__SGB4643	0.50375	0	0.29246	0	0	0	0	0.0194397	0	0	0	0	0	0	0	0	0	0
k__Bacteria|p__Bacteroidetes|c__Bacteroidia|o__Bacteroidales|f__Rikenellaceae|g__Alistipes|s__Alistipes_communis|t__SGB2290	0.41471	0	0.1689	0.42217	0	0	0.32975	0.0191585	0	0	0.09113	0	0.24237	0	0	0	0.24061	0
k__Bacteria|p__Firmicutes|c__Clostridia|o__Clostridiales|f__Lachnospiraceae|g__Anaerobutyricum|s__Anaerobutyricum_hallii|t__SGB4532	0.3736	0.37974	0.79425	0.5599	0.526	0.39785	0.08865	0.0176654	0	0	0	0	0.01276	0	0	0	0	0
k__Bacteria|p__Firmicutes|c__Clostridia|o__Clostridiales|f__Lachnospiraceae|g__Eisenbergiella|s__Eisenbergiella_tayi|t__SGB4988	0	0	0	0	0	0	0	0.0142622	0	0	0	1.15725	0.12245	2.23028	0	1.41255	0.32308	0
k__Bacteria|p__Firmicutes|c__Clostridia|o__Clostridiales|f__Clostridiales_unclassified|g__Clostridiales_unclassified|s__Clostridiales_bacterium|t__SGB15143	0	0	0	0.00583	0	0	0.00253	0.0123231	0.00496	0	0.07866	0	0.03902	0.07123	0.14771	1.21498	0.01158	0
k__Bacteria|p__Proteobacteria|c__Gammaproteobacteria|o__Enterobacterales|f__Enterobacteriaceae|g__Kluyvera|s__Kluyvera_cryocrescens|t__SGB23242	0	0	0	0	0	0	0	0.0110821	0	0	0	0	0	0	0	0	0	0
k__Bacteria|p__Firmicutes|c__Clostridia|o__Clostridiales|f__Clostridiales_unclassified|g__Evtepia|s__Evtepia_gabavorous|t__SGB15120	0.11842	0.30006	0	0	0.09932	0	1.13085	0.00937564	1.05209	0	0	0	0	0	0.26861	0.01014	0	0
k__Bacteria|p__Bacteroidetes|c__Bacteroidia|o__Bacteroidales|f__Bacteroidaceae|g__Bacteroides|s__Bacteroides_stercoris|t__SGB1830_group	0.60704	0	0	0.49612	3.84024	0	1.87639	0.00830912	1.08346	0	0	0	0.92921	0	10.1383	0.02845	0	0
k__Bacteria|p__Firmicutes|c__Clostridia|o__Clostridiales|f__Lachnospiraceae|g__Blautia|s__Blautia_SGB4815|t__SGB4815_group	0.013	0.01938	0.14758	0.02522	0	0	0.13531	0.00652513	0.06399	0.0312246	0.01594	0	0	0	0	0	0	0
k__Bacteria|p__Firmicutes|c__Clostridia|o__Clostridiales|f__Lachnospiraceae|g__GGB3746|s__GGB3746_SGB5089|t__SGB5089	0.20809	0.06557	0	0	0	2.07003	0	0.00363585	0	0	0	0	0	0	0	0	0	0.00552711
k__Bacteria|p__Firmicutes|c__Clostridia|o__Clostridiales|f__Lachnospiraceae|g__Blautia|s__Blautia_obeum|t__SGB4809	0.03492	0.69826	0	0	0	0	0	0.0033062	0.06397	0.139888	0	0	0	0	0	0	0	0
k__Bacteria|p__Firmicutes|c__Clostridia|o__Clostridiales|f__Lachnospiraceae|g__Lacrimispora|s__Lacrimispora_amygdalina|t__SGB4716	0.24831	0.43129	0	0.06979	0.72027	0.40382	1.11768	0.00312198	0.07747	0	0.10109	0	0.47981	0	0.88255	0.08714	3.19026	0
k__Bacteria|p__Firmicutes|c__Clostridia|o__Clostridiales|f__Lachnospiraceae|g__Coprococcus|s__Coprococcus_comes|t__SGB4577_group	0.18058	0	0.36497	0.44764	0.61586	0.41849	0	0.00257903	0	0	0	0.01368	0.15122	0	0	0.05515	0	0
k__Bacteria|p__Proteobacteria|c__Alphaproteobacteria|o__Rhodobacterales|f__Rhodobacteraceae|g__Rhodobacteraceae_unclassified|s__Rhodobacteraceae_unclassified_SGB53807|t__SGB53807	0	0	0	0	0	0	0.22145	0.00234633	0	0	0	0	0	0	0	0	0	0
k__Bacteria|p__Proteobacteria|c__CFGB2397|o__OFGB2397|f__FGB2397|g__GGB6561|s__GGB6561_SGB9269|t__SGB9269	0	0	0	0	0	0	0.06799	0.00210394	0	0	0	0	0	0	0	0	0	0
k__Bacteria|p__Bacteroidetes|c__Bacteroidia|o__Bacteroidales|f__Rikenellaceae|g__Alistipes|s__Alistipes_shahii|t__SGB2295	0	0	0.61376	0.02029	0.02444	0	0.44226	0.00122164	1.45251	0	1.01899	0.15813	1.68279	0	1.00795	0.06604	0.13968	0
k__Bacteria|p__Firmicutes|c__Clostridia|o__Clostridiales|f__Eubacteriaceae|g__Intestinibacillus|s__Intestinibacillus_massiliensis|t__SGB29304	0	0	0	0	0	0	0	0.000552649	0	0	0	0	0	0.10539	0	0	0	0
k__Bacteria|p__Lentisphaerae	0	0	0	0	0	0	0.01032	0	0	0	0	0	0	0	0	0	0	0
k__Bacteria|p__Verrucomicrobia	0	0	0	2.20064	0.1382	0	0	0	0	0	0.11278	0	1.86008	1.04244	0.14057	0.31738	0.0511	0
k__Bacteria|p__Firmicutes|c__Bacilli	0.08324	0.35432	0.26515	0.22023	0	0.30309	0	0	0.93895	0.64306	0	0	0.07906	0	0	0	4.73304	0.163451
k__Bacteria|p__Firmicutes|c__CFGB3053	0	0	0	0	0	0	0.02316	0	0.13116	0.84963	0	0	0	0	0	0.40751	0.17844	0
k__Bacteria|p__Lentisphaerae|c__Lentisphaeria	0	0	0	0	0	0	0.01032	0	0	0	0	0	0	0	0	0	0	0
k__Bacteria|p__Verrucomicrobia|c__Verrucomicrobiae	0	0	0	2.20064	0.1382	0	0	0	0	0	0.11278	0	1.86008	1.04244	0.14057	0.31738	0.0511	0
k__Bacteria|p__Actinobacteria|c__CFGB9370	0	0	0	0	0	0	0	0	0	0	0	0	0	0	0	0.01132	0	0
k__Bacteria|p__Firmicutes|c__Bacilli|o__Lactobacillales	0.08324	0.35432	0.26515	0	0	0.30309	0	0	0.93895	0.64306	0	0	0	0	0	0	4.73304	0.163451
k__Bacteria|p__Firmicutes|c__CFGB3053|o__OFGB3053	0	0	0	0	0	0	0.02316	0	0.13116	0.84963	0	0	0	0	0	0.40751	0.17844	0
k__Bacteria|p__Lentisphaerae|c__Lentisphaeria|o__Lentisphaeria_unclassified	0	0	0	0	0	0	0.01032	0	0	0	0	0	0	0	0	0	0	0
k__Bacteria|p__Verrucomicrobia|c__Verrucomicrobiae|o__Verrucomicrobiales	0	0	0	2.20064	0.1382	0	0	0	0	0	0.11278	0	1.86008	1.04244	0.14057	0.31738	0.0511	0
k__Bacteria|p__Actinobacteria|c__CFGB9370|o__OFGB9370	0	0	0	0	0	0	0	0	0	0	0	0	0	0	0	0.01132	0	0
k__Bacteria|p__Firmicutes|c__Bacilli|o__Lactobacillales|f__Streptococcaceae	0.08324	0.35432	0.26515	0	0	0.30309	0	0	0	0	0	0	0	0	0	0	0	0
k__Bacteria|p__Bacteroidetes|c__Bacteroidia|o__Bacteroidales|f__Barnesiellaceae	0	0	0.92825	0.24891	0	0	0.0799	0	0	0	0.26278	0.09993	0.30544	0.044	0	0	0	0
k__Bacteria|p__Firmicutes|c__CFGB3053|o__OFGB3053|f__FGB3053	0	0	0	0	0	0	0.02316	0	0.13116	0.84963	0	0	0	0	0	0.40751	0.17844	0
k__Bacteria|p__Bacteroidetes|c__Bacteroidia|o__Bacteroidales|f__Odoribacteraceae	0.06496	0	0.2372	0.11707	0.05656	0	0.00198	0	0.22961	0	0.00648	0.00231	0.03	0	0	0	0.27502	0
k__Bacteria|p__Lentisphaerae|c__Lentisphaeria|o__Lentisphaeria_unclassified|f__Lentisphaeria_unclassified	0	0	0	0	0	0	0.01032	0	0	0	0	0	0	0	0	0	0	0
k__Bacteria|p__Verrucomicrobia|c__Verrucomicrobiae|o__Verrucomicrobiales|f__Akkermansiaceae	0	0	0	2.20064	0.1382	0	0	0	0	0	0.11278	0	1.86008	1.04244	0.14057	0.31738	0.0511	0
k__Bacteria|p__Firmicutes|c__Bacilli|o__Lactobacillales|f__Enterococcaceae	0	0	0	0	0	0	0	0	0.92721	0.64306	0	0	0	0	0	0	4.73304	0.163451
k__Bacteria|p__Actinobacteria|c__CFGB9370|o__OFGB9370|f__FGB9370	0	0	0	0	0	0	0	0	0	0	0	0	0	0	0	0.01132	0	0
k__Bacteria|p__Firmicutes|c__Clostridia|o__Clostridiales|f__Clostridiaceae|g__Clostridiaceae_unclassified	0.21673	0	0.6183	0.71003	0.08831	0.41627	1.93209	0	2.21762	0	1.9368	0	1.74462	0	2.83627	0.0093	0.37181	0
k__Bacteria|p__Firmicutes|c__Clostridia|o__Clostridiales|f__Eubacteriaceae|g__Eubacterium	0	0	0.14019	0	1.16383	0.2197	1.92743	0	0	0	0	0	0	0	1.32489	0.03367	0.20877	0
k__Bacteria|p__Bacteroidetes|c__Bacteroidia|o__Bacteroidales|f__Prevotellaceae|g__Paraprevotella	0.23249	0	0	0	0	0	1.61217	0	0	0	0	0	0	0	0	0	0	0
k__Bacteria|p__Firmicutes|c__Clostridia|o__Clostridiales|f__Lachnospiraceae|g__Lachnoclostridium	0	0	0	0	0	0	0.78282	0	0	0	0	0	0.64381	0.03238	0.10649	0.40872	0	0
k__Bacteria|p__Firmicutes|c__Bacilli|o__Lactobacillales|f__Streptococcaceae|g__Streptococcus	0.08324	0.35432	0.26515	0	0	0.30309	0	0	0	0	0	0	0	0	0	0	0	0
k__Bacteria|p__Firmicutes|c__Clostridia|o__Clostridiales|f__Ruminococcaceae|g__Flavonifractor	0	0	0	0.05288	0	0	0.59541	0	0.09235	0	0.2635	0	1.48133	0	0.07457	0	0.07855	0
k__Bacteria|p__Firmicutes|c__Clostridia|o__Clostridiales|f__Ruminococcaceae|g__GGB9632	0	0	0.4024	0	0	0	0.28237	0	0	0	2.6707	0.32225	0.35015	0	0	0.04998	0.0505	0
k__Bacteria|p__Firmicutes|c__Clostridia|o__Clostridiales|f__Ruminococcaceae|g__Bittarella	0	0	0	0	0	0	0.29328	0	0	0	0.02053	0	0	0	0.05195	0	0.03962	0
k__Bacteria|p__Firmicutes|c__Clostridia|o__Clostridiales|f__Lachnospiraceae|g__Fusicatenibacter	0	6.42199	0.59899	2.32719	8.23474	3.75753	0	0	0.13982	0.740156	0.20346	0.11119	1.72506	0.48546	4.13072	1.43638	0.14133	0.144262
k__Bacteria|p__Bacteroidetes|c__Bacteroidia|o__Bacteroidales|f__Barnesiellaceae|g__Barnesiella	0	0	0.92825	0.24891	0	0	0.0799	0	0	0	0.26278	0.09993	0.30544	0.044	0	0	0	0
k__Bacteria|p__Firmicutes|c__CFGB3053|o__OFGB3053|f__FGB3053|g__GGB9581	0	0	0	0	0	0	0.02316	0	0.13116	0.84963	0	0	0	0	0	0.40751	0.17844	0
k__Bacteria|p__Firmicutes|c__Clostridia|o__Clostridiales|f__Ruminococcaceae|g__Anaerotruncus	0	0	0	0	0	0	0.07396	0	0	0	0.01491	0	0.14856	0	0.05276	0	0	0
k__Bacteria|p__Firmicutes|c__Clostridia|o__Clostridiales|f__Ruminococcaceae|g__GGB9619	0	0	0	0	0	0	0.02008	0	0.10117	0	0.2158	0	0.15927	0	0.01046	0.0038	0.36544	0
k__Bacteria|p__Firmicutes|c__Clostridia|o__Clostridia_unclassified|f__Clostridia_unclassified|g__GGB3005	0	0	0	0	0	0	0.11425	0	0	0	0	0	0	0	0	0	0	0
k__Bacteria|p__Bacteroidetes|c__Bacteroidia|o__Bacteroidales|f__Odoribacteraceae|g__Odoribacter	0.06496	0	0.2372	0.11707	0.05656	0	0.00198	0	0.22961	0	0.00648	0.00231	0.01639	0	0	0	0.27502	0
k__Bacteria|p__Firmicutes|c__Negativicutes|o__Veillonellales|f__Veillonellaceae|g__Dialister	0	0	0.33007	0.00892	0	0	0	0	0	0	0	0	0.20104	0.04022	0	0.00417	0	0
k__Bacteria|p__Actinobacteria|c__Coriobacteriia|o__Eggerthellales|f__Eggerthellaceae|g__Gordonibacter	0	0	0	0	0	0	0	0	0	0	0.01396	0	0	0	0.16151	0.02972	0	0
k__Bacteria|p__Bacteroidetes|c__Bacteroidia|o__Bacteroidales|f__Odoribacteraceae|g__Butyricimonas	0	0	0	0	0	0	0	0	0	0	0	0	0.01361	0	0	0	0	0
k__Bacteria|p__Lentisphaerae|c__Lentisphaeria|o__Lentisphaeria_unclassified|f__Lentisphaeria_unclassified|g__Lentisphaeria_unclassified	0	0	0	0	0	0	0.01032	0	0	0	0	0	0	0	0	0	0	0
k__Bacteria|p__Verrucomicrobia|c__Verrucomicrobiae|o__Verrucomicrobiales|f__Akkermansiaceae|g__Akkermansia	0	0	0	2.20064	0.1382	0	0	0	0	0	0.11278	0	1.86008	1.04244	0.14057	0.31738	0.0511	0
k__Bacteria|p__Firmicutes|c__Clostridia|o__Clostridiales|f__Clostridiales_unclassified|g__Intestinimonas	0	0	0	0	0	0	0	0	0	0	0.05117	0	0.08111	0	0.02867	0.01081	0	0
k__Bacteria|p__Firmicutes|c__Bacilli|o__Lactobacillales|f__Enterococcaceae|g__Enterococcus	0	0	0	0	0	0	0	0	0.92721	0.64306	0	0	0	0	0	0	4.73304	0.163451
k__Bacteria|p__Actinobacteria|c__Coriobacteriia|o__Eggerthellales|f__Eggerthellaceae|g__Eggerthella	0	0	0	0	0.35903	0	0	0	0	0	0.15285	0	0.03052	0	1.19302	0.086	0	0
k__Bacteria|p__Firmicutes|c__Clostridia|o__Clostridiales|f__Clostridiaceae|g__Hungatella	0	0	0	0	0	0	0	0	0	0	0.026	0.29035	0.33215	0.46002	0	0.77242	0	0
k__Bacteria|p__Firmicutes|c__Clostridia|o__Clostridiales|f__Ruminococcaceae|g__GGB9621	0	0	0	0	0	0	0	0	1.33087	0	0	0	0	0	0	0	0.06472	0
k__Bacteria|p__Firmicutes|c__Clostridia|o__Clostridiales|f__Ruminococcaceae|g__GGB3343	1.20917	0	0	0	3.16469	0	0.07623	0	0	0	0	0	0	0	0	0	0	0
k__Bacteria|p__Actinobacteria|c__CFGB9370|o__OFGB9370|f__FGB9370|g__GGB51959	0	0	0	0	0	0	0	0	0	0	0	0	0	0	0	0.01132	0	0
k__Bacteria|p__Bacteroidetes|c__Bacteroidia|o__Bacteroidales|f__Bacteroidaceae|g__Bacteroides|s__Bacteroides_thetaiotaomicron	0.09821	0	0	0	0	0	4.77189	0	0	0	2.41336	0	0.30522	0	0	0	2.88494	0
k__Bacteria|p__Bacteroidetes|c__Bacteroidia|o__Bacteroidales|f__Tannerellaceae|g__Parabacteroides|s__Parabacteroides_johnsonii	0.15748	0	0	0	0	0	3.41757	0	0	0	0	0	0.60994	0	0.05052	0	0	0
k__Bacteria|p__Firmicutes|c__Clostridia|o__Clostridiales|f__Clostridiaceae|g__Clostridiaceae_unclassified|s__Clostridiaceae_bacterium	0.21673	0	0.6183	0.68321	0.01354	0.40872	1.93209	0	2.21762	0	1.9368	0	1.74462	0	2.83627	0.0093	0	0
k__Bacteria|p__Firmicutes|c__Clostridia|o__Clostridiales|f__Eubacteriaceae|g__Eubacterium|s__Eubacterium_callanderi	0	0	0	0	0	0	1.92517	0	0	0	0	0	0	0	0	0	0	0
k__Bacteria|p__Bacteroidetes|c__Bacteroidia|o__Bacteroidales|f__Rikenellaceae|g__Alistipes|s__Alistipes_finegoldii	0.24277	0	0.72125	0.12663	0	0	0.60749	0	0.09673	0	1.12139	0.14407	0.27208	0	0	0	0	0
k__Bacteria|p__Bacteroidetes|c__Bacteroidia|o__Bacteroidales|f__Prevotellaceae|g__Paraprevotella|s__Paraprevotella_clara	0.23249	0	0	0	0	0	1.61217	0	0	0	0	0	0	0	0	0	0	0
k__Bacteria|p__Firmicutes|c__Clostridia|o__Clostridiales|f__Lachnospiraceae|g__Enterocloster|s__Enterocloster_aldensis	0	0	0	0	0	0	0	0	0	0	0	0.0642	0.04825	0.52867	0.13527	0.61336	0	0
k__Bacteria|p__Bacteroidetes|c__Bacteroidia|o__Bacteroidales|f__Bacteroidaceae|g__Bacteroides|s__Bacteroides_ovatus	0	0	0.72489	0	0	0	1.2257	0	1.72587	0	3.74406	0.25002	0.49258	0	1.0294	0.01139	2.0853	0
k__Bacteria|p__Firmicutes|c__Clostridia|o__Clostridiales|f__Clostridiales_unclassified|g__Clostridiales_unclassified|s__Clostridiales_bacterium_Choco116	0	0	0	0	0	0	0.74493	0	0	0	0	0	0	0	0	0	0	0
k__Bacteria|p__Firmicutes|c__Clostridia|o__Clostridiales|f__Clostridiaceae|g__Clostridium|s__Clostridium_fessum	0.03002	0.4781	0.09613	0.19238	0	0.04651	0.61081	0	5.1748	1.47567	0	0	0.94616	0.96897	0	0	0.21673	0
k__Bacteria|p__Firmicutes|c__Clostridia|o__Clostridiales|f__Lachnospiraceae|g__Dorea|s__Dorea_formicigenerans	0	0	0.38061	0.08646	0.05179	0.02587	0.87152	0	0.28575	0	0.4568	0	0.52175	0	0.13945	0	1.05465	0
k__Bacteria|p__Firmicutes|c__Clostridia|o__Clostridiales|f__Lachnospiraceae|g__Enterocloster|s__Enterocloster_citroniae	0	0	0	0	0	0	0.63823	0	1.20023	0.0144135	0.88105	0.33031	0.50966	0.03774	1.55541	0.88378	0	0
k__Bacteria|p__Firmicutes|c__Clostridia|o__Clostridiales|f__Lachnospiraceae|g__Lachnoclostridium|s__Clostridium_symbiosum	0	0	0	0	0	0	0.78282	0	0	0	0	0	0.64381	0.03238	0.10649	0.40872	0	0
k__Bacteria|p__Bacteroidetes|c__Bacteroidia|o__Bacteroidales|f__Prevotellaceae|g__Prevotella|s__Prevotella_marseillensis	7.71611	0	0	0	5.54921	10.1329	0.45942	0	0	0	0	0	0	0	0.01141	0	0	0
k__Bacteria|p__Firmicutes|c__Clostridia|o__Clostridiales|f__Lachnospiraceae|g__Blautia|s__Blautia_glucerasea	0.02902	0.6094	0	0	0.05809	0	0	0	0	0.0773109	0	0	0	0	0	0.00032	0	0
k__Bacteria|p__Firmicutes|c__Clostridia|o__Clostridiales|f__Ruminococcaceae|g__Flavonifractor|s__Flavonifractor_plautii	0	0	0	0.05288	0	0	0.59541	0	0.09235	0	0.2635	0	1.48133	0	0.07457	0	0.07855	0
k__Bacteria|p__Firmicutes|c__Clostridia|o__Clostridiales|f__Ruminococcaceae|g__GGB9632|s__GGB9632_SGB15089	0	0	0.4024	0	0	0	0.28237	0	0	0	2.6707	0.32225	0.35015	0	0	0.04998	0.0505	0
k__Bacteria|p__Firmicutes|c__Clostridia|o__Clostridiales|f__Ruminococcaceae|g__Bittarella|s__Bittarella_massiliensis	0	0	0	0	0	0	0.29328	0	0	0	0.02053	0	0	0	0.05195	0	0.03962	0
k__Bacteria|p__Firmicutes|c__Clostridia|o__Clostridiales|f__Clostridiaceae|g__Clostridium|s__Clostridium_sp_AF20_17LB	0.02999	0	0	0	0	0	0.1657	0	0	0	0.4202	0	0	0	0	0	0	0
k__Bacteria|p__Firmicutes|c__Bacilli|o__Lactobacillales|f__Streptococcaceae|g__Streptococcus|s__Streptococcus_salivarius	0	0	0.14292	0	0	0	0	0	0	0	0	0	0	0	0	0	0	0
k__Bacteria|p__Firmicutes|c__Clostridia|o__Clostridiales|f__Lachnospiraceae|g__Fusicatenibacter|s__Fusicatenibacter_saccharivorans	0	6.42199	0.59899	2.32719	8.23474	3.75753	0	0	0.13982	0.740156	0.20346	0.11119	1.72506	0.48546	4.13072	1.43638	0.14133	0.144262
k__Bacteria|p__Bacteroidetes|c__Bacteroidia|o__Bacteroidales|f__Barnesiellaceae|g__Barnesiella|s__Barnesiella_intestinihominis	0	0	0.92825	0.24891	0	0	0.0799	0	0	0	0.26278	0.09993	0.30544	0.044	0	0	0	0
k__Bacteria|p__Bacteroidetes|c__Bacteroidia|o__Bacteroidales|f__Rikenellaceae|g__Alistipes|s__Alistipes_onderdonkii	0	0	0.11645	0.2203	0	0	0.11595	0	0	0	0.50004	0.01485	0.44608	0	0.25866	0	0.35912	0
k__Bacteria|p__Firmicutes|c__Clostridia|o__Clostridiales|f__Clostridiaceae|g__Clostridium|s__Clostridium_sp_AM22_11AC	0	0	0	0.22745	0.62101	0	0.05656	0	0	0	0	0	0	0	0.15757	0.08486	0.08218	0
k__Bacteria|p__Firmicutes|c__Clostridia|o__Clostridiales|f__Oscillospiraceae|g__Dysosmobacter|s__Dysosmobacter_sp_NSJ_60	0	0	0	0.01278	0	0	0	0	0.2059	0	0.05098	0	0	0	0	0.00546	0	0
k__Bacteria|p__Firmicutes|c__CFGB3053|o__OFGB3053|f__FGB3053|g__GGB9581|s__GGB9581_SGB14999	0	0	0	0	0	0	0.02316	0	0.13116	0.84963	0	0	0	0	0	0.40751	0	0
k__Bacteria|p__Bacteroidetes|c__Bacteroidia|o__Bacteroidales|f__Rikenellaceae|g__Alistipes|s__Alistipes_sp_AF17_16	0	0	0	0	0	0	0	0	0	0	0	0	0	0	0.1038	0	0	0
k__Bacteria|p__Firmicutes|c__Clostridia|o__Clostridiales|f__Ruminococcaceae|g__Anaerotruncus|s__Anaerotruncus_massiliensis	0	0	0	0	0	0	0.07396	0	0	0	0	0	0.12485	0	0.05276	0	0	0
k__Bacteria|p__Firmicutes|c__Clostridia|o__Clostridiales|f__Ruminococcaceae|g__GGB9619|s__GGB9619_SGB15067	0	0	0	0	0	0	0.02008	0	0.10117	0	0.2158	0	0.15927	0	0.01046	0.0038	0.36544	0
k__Bacteria|p__Firmicutes|c__Clostridia|o__Clostridiales|f__Lachnospiraceae|g__Mediterraneibacter|s__Mediterraneibacter_butyricigenes	0	0	0	0	0	0	0	0	0	0	0	0	0	0	0	0	0.00174	0
k__Bacteria|p__Firmicutes|c__Clostridia|o__Clostridia_unclassified|f__Clostridia_unclassified|g__GGB3005|s__GGB3005_SGB3996	0	0	0	0	0	0	0.11425	0	0	0	0	0	0	0	0	0	0	0
k__Bacteria|p__Firmicutes|c__Clostridia|o__Clostridiales|f__Lachnospiraceae|g__Blautia|s__Blautia_stercoris	0.03262	0	0	0	0	0	0	0	0	0	0	0	0	0	0	0	0	0
k__Bacteria|p__Actinobacteria|c__Coriobacteriia|o__Eggerthellales|f__Eggerthellaceae|g__Eggerthellaceae_unclassified|s__Eggerthellaceae_unclassified_SGB14341	0.04799	0	0	0.1401	0	0	0	0	0	0	0	0	0.00739	0	0	0	0	0
k__Bacteria|p__Firmicutes|c__Clostridia|o__Clostridiales|f__Lachnospiraceae|g__Eisenbergiella|s__Eisenbergiella_massiliensis	0	0	0	0	0	0	0.03192	0	0	0	0	0	0	0	0	0	0	0
k__Bacteria|p__Firmicutes|c__Clostridia|o__Clostridiales|f__Lachnospiraceae|g__Dorea|s__Dorea_sp_AF36_15AT	0.02125	0	0.05678	0.02793	0	0	0.37541	0	0	0	0.06609	0	0	0.08385	0	0	0.08083	0
k__Bacteria|p__Bacteroidetes|c__Bacteroidia|o__Bacteroidales|f__Odoribacteraceae|g__Odoribacter|s__Odoribacter_splanchnicus	0.06496	0	0.2372	0.11707	0.05656	0	0.00198	0	0.22961	0	0.00648	0.00231	0.01639	0	0	0	0.27502	0
k__Bacteria|p__Bacteroidetes|c__Bacteroidia|o__Bacteroidales|f__Bacteroidaceae|g__Bacteroides|s__Bacteroides_xylanisolvens	0	0	0	0	0	0	0	0	0	0	0	0	0	0	0	0	0.02831	0
k__Bacteria|p__Firmicutes|c__Negativicutes|o__Veillonellales|f__Veillonellaceae|g__Dialister|s__Dialister_pneumosintes	0	0	0	0	0	0	0	0	0	0	0	0	0	0	0	0.00417	0	0
k__Bacteria|p__Lentisphaerae|c__Lentisphaeria|o__Lentisphaeria_unclassified|f__Lentisphaeria_unclassified|g__Lentisphaeria_unclassified|s__Lentisphaeria_unclassified_SGB9198	0	0	0	0	0	0	0.01032	0	0	0	0	0	0	0	0	0	0	0
k__Bacteria|p__Firmicutes|c__Clostridia|o__Clostridiales|f__Ruminococcaceae|g__Ruminococcaceae_unclassified|s__Clostridium_methylpentosum	0	0	0	0	0	0	0.02816	0	0	0	0	0	0.00084	0	0	0	0	0
k__Bacteria|p__Firmicutes|c__Clostridia|o__Clostridiales|f__Lachnospiraceae|g__Blautia|s__Blautia_faecis	0	0.38795	0.25932	0	0.0164	0.04444	0	0	0.04062	0.0589489	0	0	0	0	0	0	0	0
k__Bacteria|p__Firmicutes|c__Bacilli|o__Lactobacillales|f__Enterococcaceae|g__Enterococcus|s__Enterococcus_faecium	0	0	0	0	0	0	0	0	0	0	0	0	0	0	0	0	0.88021	0.151282
k__Bacteria|p__Firmicutes|c__Clostridia|o__Clostridiales|f__Lachnospiraceae|g__Blautia|s__Blautia_SGB4805	0.03213	0	0	0	0	0	0	0	0	0	0	0	0	0	0	0	0	0
k__Bacteria|p__Firmicutes|c__Clostridia|o__Clostridiales|f__Lachnospiraceae|g__Faecalicatena|s__Faecalicatena_contorta	0	0	0	0	0	0	0	0	0.04988	0	0	0	0	0	0	0.06091	0.0225	0
k__Bacteria|p__Firmicutes|c__Clostridia|o__Clostridiales|f__Clostridiales_unclassified|g__Intestinimonas|s__Intestinimonas_butyriciproducens	0	0	0	0	0	0	0	0	0	0	0	0	0	0	0.02867	0.01081	0	0
k__Bacteria|p__Actinobacteria|c__Coriobacteriia|o__Eggerthellales|f__Eggerthellaceae|g__Eggerthella|s__Eggerthella_lenta	0	0	0	0	0.35903	0	0	0	0	0	0.15285	0	0.03052	0	1.19302	0.086	0	0
k__Bacteria|p__Firmicutes|c__Clostridia|o__Clostridiales|f__Clostridiaceae|g__Hungatella|s__Hungatella_hathewayi	0	0	0	0	0	0	0	0	0	0	0.026	0.29035	0.33215	0.46002	0	0.77242	0	0
k__Bacteria|p__Firmicutes|c__Clostridia|o__Clostridiales|f__Ruminococcaceae|g__GGB9621|s__GGB9621_SGB15073	0	0	0	0	0	0	0	0	1.33087	0	0	0	0	0	0	0	0.06472	0
k__Bacteria|p__Actinobacteria|c__Coriobacteriia|o__Coriobacteriales|f__Coriobacteriaceae|g__Collinsella|s__Collinsella_SGB14754	0	0	0	0	0	0	0	0	0	0	0	0	0.05692	0	0	0	0	0
k__Bacteria|p__Firmicutes|c__Clostridia|o__Clostridiales|f__Ruminococcaceae|g__GGB3343|s__GGB3343_SGB4423	1.20917	0	0	0	3.16469	0	0.07623	0	0	0	0	0	0	0	0	0	0	0
k__Bacteria|p__Firmicutes|c__Clostridia|o__Clostridiales|f__Lachnospiraceae|g__Lacrimispora|s__Lacrimispora_saccharolytica	0	0	0	0	0	0	0	0	0	0	0.40872	0	0	0	0	0	0.34492	0
k__Bacteria|p__Firmicutes|c__Clostridia|o__Clostridiales|f__Lachnospiraceae|g__Lacrimispora|s__Lacrimispora_celerecrescens	0.02383	0.06358	0.18727	0	0	0	0	0	0	0	0	0	0	0	0	0	0	0
k__Bacteria|p__Actinobacteria|c__CFGB9370|o__OFGB9370|f__FGB9370|g__GGB51959|s__GGB51959_SGB72479	0	0	0	0	0	0	0	0	0	0	0	0	0	0	0	0.01132	0	0
k__Bacteria|p__Bacteroidetes|c__Bacteroidia|o__Bacteroidales|f__Bacteroidaceae|g__Bacteroides|s__Bacteroides_thetaiotaomicron|t__SGB1861	0.09821	0	0	0	0	0	4.77189	0	0	0	2.41336	0	0.30522	0	0	0	2.88494	0
k__Bacteria|p__Bacteroidetes|c__Bacteroidia|o__Bacteroidales|f__Tannerellaceae|g__Parabacteroides|s__Parabacteroides_johnsonii|t__SGB1948	0.15748	0	0	0	0	0	3.41757	0	0	0	0	0	0.60994	0	0.05052	0	0	0
k__Bacteria|p__Firmicutes|c__Clostridia|o__Clostridiales|f__Clostridiaceae|g__Clostridiaceae_unclassified|s__Clostridiaceae_bacterium|t__SGB4269	0.21673	0	0.6183	0.6357	0	0.40872	1.93209	0	2.09022	0	1.9368	0	1.42156	0	2.83627	0	0	0
k__Bacteria|p__Firmicutes|c__Clostridia|o__Clostridiales|f__Eubacteriaceae|g__Eubacterium|s__Eubacterium_callanderi|t__SGB4080	0	0	0	0	0	0	1.92517	0	0	0	0	0	0	0	0	0	0	0
k__Bacteria|p__Bacteroidetes|c__Bacteroidia|o__Bacteroidales|f__Rikenellaceae|g__Alistipes|s__Alistipes_finegoldii|t__SGB2301	0.24277	0	0.72125	0.12663	0	0	0.60749	0	0.09673	0	1.12139	0.14407	0.27208	0	0	0	0	0
k__Bacteria|p__Bacteroidetes|c__Bacteroidia|o__Bacteroidales|f__Prevotellaceae|g__Paraprevotella|s__Paraprevotella_clara|t__SGB1798	0.23249	0	0	0	0	0	1.61217	0	0	0	0	0	0	0	0	0	0	0
k__Bacteria|p__Firmicutes|c__Clostridia|o__Clostridiales|f__Lachnospiraceae|g__Enterocloster|s__Enterocloster_aldensis|t__SGB4762	0	0	0	0	0	0	0	0	0	0	0	0.0642	0.04825	0.52867	0.13527	0.61336	0	0
k__Bacteria|p__Bacteroidetes|c__Bacteroidia|o__Bacteroidales|f__Bacteroidaceae|g__Bacteroides|s__Bacteroides_ovatus|t__SGB1871	0	0	0.72489	0	0	0	1.2257	0	1.72587	0	3.74406	0.25002	0.49258	0	1.0294	0.01139	2.0853	0
k__Bacteria|p__Firmicutes|c__Clostridia|o__Clostridiales|f__Clostridiales_unclassified|g__Clostridiales_unclassified|s__Clostridiales_bacterium_Choco116|t__SGB15149	0	0	0	0	0	0	0.74493	0	0	0	0	0	0	0	0	0	0	0
k__Bacteria|p__Firmicutes|c__Clostridia|o__Clostridiales|f__Clostridiaceae|g__Clostridium|s__Clostridium_fessum|t__SGB4705	0.03002	0.4781	0.09613	0.19238	0	0.04651	0.61081	0	5.1748	1.47567	0	0	0.94616	0.96897	0	0	0.21673	0
k__Bacteria|p__Firmicutes|c__Clostridia|o__Clostridiales|f__Lachnospiraceae|g__Dorea|s__Dorea_formicigenerans|t__SGB4575	0	0	0.38061	0.08646	0.05179	0.02587	0.87152	0	0.28575	0	0.4568	0	0.52175	0	0.13945	0	1.05465	0
k__Bacteria|p__Firmicutes|c__Clostridia|o__Clostridiales|f__Lachnospiraceae|g__Enterocloster|s__Enterocloster_citroniae|t__SGB4761	0	0	0	0	0	0	0.63823	0	1.20023	0.0144135	0.88105	0.33031	0.50966	0.03774	1.55541	0.88378	0	0
k__Bacteria|p__Firmicutes|c__Clostridia|o__Clostridiales|f__Lachnospiraceae|g__Lachnoclostridium|s__Clostridium_symbiosum|t__SGB4699	0	0	0	0	0	0	0.78282	0	0	0	0	0	0.64381	0.03238	0.10649	0.40872	0	0
k__Bacteria|p__Bacteroidetes|c__Bacteroidia|o__Bacteroidales|f__Prevotellaceae|g__Prevotella|s__Prevotella_marseillensis|t__SGB1588	7.71611	0	0	0	5.54921	10.1329	0.45942	0	0	0	0	0	0	0	0.01141	0	0	0
k__Bacteria|p__Firmicutes|c__Clostridia|o__Clostridiales|f__Lachnospiraceae|g__Blautia|s__Blautia_glucerasea|t__SGB4816	0.02902	0.6094	0	0	0.05809	0	0	0	0	0.0773109	0	0	0	0	0	0.00032	0	0
k__Bacteria|p__Firmicutes|c__Clostridia|o__Clostridiales|f__Ruminococcaceae|g__Flavonifractor|s__Flavonifractor_plautii|t__SGB15132	0	0	0	0.05288	0	0	0.59541	0	0.09235	0	0.2635	0	1.48133	0	0.07457	0	0.07855	0
k__Bacteria|p__Firmicutes|c__Clostridia|o__Clostridiales|f__Ruminococcaceae|g__GGB9632|s__GGB9632_SGB15089|t__SGB15089	0	0	0.4024	0	0	0	0.28237	0	0	0	2.6707	0.32225	0.35015	0	0	0.04998	0.0505	0
k__Bacteria|p__Firmicutes|c__Clostridia|o__Clostridiales|f__Ruminococcaceae|g__Bittarella|s__Bittarella_massiliensis|t__SGB7263	0	0	0	0	0	0	0.29328	0	0	0	0.02053	0	0	0	0.05195	0	0.03962	0
k__Bacteria|p__Firmicutes|c__Clostridia|o__Clostridiales|f__Lachnospiraceae|g__Lachnospiraceae_unclassified|s__Lachnospiraceae_bacterium|t__SGB4782	0.04726	0	0	0.01653	0	0	0	0	0	0	0	0	0	0	0	0	0	0
k__Bacteria|p__Firmicutes|c__Clostridia|o__Clostridiales|f__Lachnospiraceae|g__Lachnospiraceae_unclassified|s__Lachnospiraceae_bacterium|t__SGB4706	0	0	0.01921	0	0	0.03633	0.20307	0	0.25706	0.137982	0.15281	0	0	0	0	0	0.78647	0
k__Bacteria|p__Firmicutes|c__Clostridia|o__Clostridiales|f__Clostridiaceae|g__Clostridium|s__Clostridium_sp_AF20_17LB|t__SGB4714	0.02999	0	0	0	0	0	0.1657	0	0	0	0.4202	0	0	0	0	0	0	0
k__Bacteria|p__Firmicutes|c__Clostridia|o__Clostridia_unclassified|f__Clostridia_unclassified|g__Clostridia_unclassified|s__Clostridia_bacterium|t__SGB3957	0	0	0.12658	0.06146	0	0	0	0	0	0	0.14489	0	0.15616	0	0	0	0.78898	0
k__Bacteria|p__Firmicutes|c__Bacilli|o__Lactobacillales|f__Streptococcaceae|g__Streptococcus|s__Streptococcus_salivarius|t__SGB8007_group	0	0	0.14292	0	0	0	0	0	0	0	0	0	0	0	0	0	0	0
k__Bacteria|p__Firmicutes|c__Clostridia|o__Clostridiales|f__Lachnospiraceae|g__Fusicatenibacter|s__Fusicatenibacter_saccharivorans|t__SGB4874	0	6.42199	0.59899	2.32719	8.23474	3.75753	0	0	0.13982	0.740156	0.20346	0.11119	1.72506	0.48546	4.13072	1.43638	0.14133	0.144262
k__Bacteria|p__Bacteroidetes|c__Bacteroidia|o__Bacteroidales|f__Barnesiellaceae|g__Barnesiella|s__Barnesiella_intestinihominis|t__SGB1965	0	0	0.92825	0.24891	0	0	0.0799	0	0	0	0.26278	0.09993	0.30544	0.044	0	0	0	0
k__Bacteria|p__Bacteroidetes|c__Bacteroidia|o__Bacteroidales|f__Rikenellaceae|g__Alistipes|s__Alistipes_onderdonkii|t__SGB2303	0	0	0.11645	0.2203	0	0	0.11595	0	0	0	0.50004	0.01485	0.44608	0	0.25866	0	0.35912	0
k__Bacteria|p__Firmicutes|c__Clostridia|o__Clostridiales|f__Clostridiaceae|g__Clostridium|s__Clostridium_sp_AM22_11AC|t__SGB4749	0	0	0	0.22745	0.62101	0	0.05656	0	0	0	0	0	0	0	0.15757	0.08486	0.08218	0
k__Bacteria|p__Firmicutes|c__Clostridia|o__Clostridiales|f__Oscillospiraceae|g__Dysosmobacter|s__Dysosmobacter_sp_NSJ_60|t__SGB15124	0	0	0	0.01278	0	0	0	0	0.2059	0	0.05098	0	0	0	0	0.00546	0	0
k__Bacteria|p__Firmicutes|c__CFGB3053|o__OFGB3053|f__FGB3053|g__GGB9581|s__GGB9581_SGB14999|t__SGB14999	0	0	0	0	0	0	0.02316	0	0.13116	0.84963	0	0	0	0	0	0.40751	0	0
k__Bacteria|p__Bacteroidetes|c__Bacteroidia|o__Bacteroidales|f__Rikenellaceae|g__Alistipes|s__Alistipes_sp_AF17_16|t__SGB2326	0	0	0	0	0	0	0	0	0	0	0	0	0	0	0.1038	0	0	0
k__Bacteria|p__Firmicutes|c__Clostridia|o__Clostridiales|f__Ruminococcaceae|g__Anaerotruncus|s__Anaerotruncus_massiliensis|t__SGB14965	0	0	0	0	0	0	0.07396	0	0	0	0	0	0.12485	0	0.05276	0	0	0
k__Bacteria|p__Firmicutes|c__Clostridia|o__Clostridiales|f__Ruminococcaceae|g__GGB9619|s__GGB9619_SGB15067|t__SGB15067	0	0	0	0	0	0	0.02008	0	0.10117	0	0.2158	0	0.15927	0	0.01046	0.0038	0.36544	0
k__Bacteria|p__Firmicutes|c__Clostridia|o__Clostridiales|f__Lachnospiraceae|g__Mediterraneibacter|s__Mediterraneibacter_butyricigenes|t__SGB25493	0	0	0	0	0	0	0	0	0	0	0	0	0	0	0	0	0.00174	0
k__Bacteria|p__Firmicutes|c__Clostridia|o__Clostridiales|f__Lachnospiraceae|g__Lachnospiraceae_unclassified|s__Lachnospiraceae_bacterium|t__SGB4718	0	0	0	0	0	0	0.11727	0	0.06724	0	0	0	0	0	0	0	0	0
k__Bacteria|p__Firmicutes|c__Clostridia|o__Clostridia_unclassified|f__Clostridia_unclassified|g__Clostridia_unclassified|s__Clostridia_bacterium|t__SGB3969	0	0	0	0	0	0	0.0214	0	0	0	0	0	0	0	0	0	0	0
k__Bacteria|p__Firmicutes|c__Clostridia|o__Clostridia_unclassified|f__Clostridia_unclassified|g__GGB3005|s__GGB3005_SGB3996|t__SGB3996	0	0	0	0	0	0	0.11425	0	0	0	0	0	0	0	0	0	0	0
k__Bacteria|p__Firmicutes|c__Clostridia|o__Clostridiales|f__Lachnospiraceae|g__Lachnospiraceae_unclassified|s__Lachnospiraceae_bacterium|t__SGB4781	0.00506	0	0	0	0	0	0	0	0	0	0	0	0	0	0	0	0	0
k__Bacteria|p__Firmicutes|c__Clostridia|o__Clostridiales|f__Lachnospiraceae|g__Blautia|s__Blautia_stercoris|t__SGB4788_group	0.03262	0	0	0	0	0	0	0	0	0	0	0	0	0	0	0	0	0
k__Bacteria|p__Actinobacteria|c__Coriobacteriia|o__Eggerthellales|f__Eggerthellaceae|g__Eggerthellaceae_unclassified|s__Eggerthellaceae_unclassified_SGB14341|t__SGB14341	0.04799	0	0	0.1401	0	0	0	0	0	0	0	0	0.00739	0	0	0	0	0
k__Bacteria|p__Firmicutes|c__Clostridia|o__Clostridiales|f__Lachnospiraceae|g__Eisenbergiella|s__Eisenbergiella_massiliensis|t__SGB4987	0	0	0	0	0	0	0.03192	0	0	0	0	0	0	0	0	0	0	0
k__Bacteria|p__Firmicutes|c__Clostridia|o__Clostridiales|f__Lachnospiraceae|g__Dorea|s__Dorea_sp_AF36_15AT|t__SGB4552_group	0.02125	0	0.05678	0.02793	0	0	0.37541	0	0	0	0.06609	0	0	0.08385	0	0	0.08083	0
k__Bacteria|p__Bacteroidetes|c__Bacteroidia|o__Bacteroidales|f__Odoribacteraceae|g__Odoribacter|s__Odoribacter_splanchnicus|t__SGB1790	0.06496	0	0.2372	0.11707	0.05656	0	0.00198	0	0.22961	0	0.00648	0.00231	0.01639	0	0	0	0.27502	0
k__Bacteria|p__Firmicutes|c__Clostridia|o__Clostridia_unclassified|f__Clostridia_unclassified|g__Clostridia_unclassified|s__Clostridia_bacterium|t__SGB5180	0	0	0	0	0	0	0	0	0	0	0.05674	0	0	0	0	0	0	0
k__Bacteria|p__Bacteroidetes|c__Bacteroidia|o__Bacteroidales|f__Bacteroidaceae|g__Bacteroides|s__Bacteroides_xylanisolvens|t__SGB1867	0	0	0	0	0	0	0	0	0	0	0	0	0	0	0	0	0.02831	0
k__Bacteria|p__Firmicutes|c__Negativicutes|o__Veillonellales|f__Veillonellaceae|g__Dialister|s__Dialister_pneumosintes|t__SGB5842	0	0	0	0	0	0	0	0	0	0	0	0	0	0	0	0.00417	0	0
k__Bacteria|p__Firmicutes|c__Clostridia|o__Clostridiales|f__Lachnospiraceae|g__Mediterraneibacter|s__Ruminococcus_torques|t__SGB4608	0	0	0	0	0	0	0.153	0	0.19865	0	0	0	0	0	0	0	0	0
k__Bacteria|p__Firmicutes|c__Clostridia|o__Clostridia_unclassified|f__Clostridia_unclassified|g__Clostridia_unclassified|s__Clostridia_bacterium|t__SGB3988	0	0	0	0	0	0	0.07123	0	0	0	0.00236	0	0	0	0	0	0	0
k__Bacteria|p__Lentisphaerae|c__Lentisphaeria|o__Lentisphaeria_unclassified|f__Lentisphaeria_unclassified|g__Lentisphaeria_unclassified|s__Lentisphaeria_unclassified_SGB9198|t__SGB9198	0	0	0	0	0	0	0.01032	0	0	0	0	0	0	0	0	0	0	0
k__Bacteria|p__Firmicutes|c__Clostridia|o__Clostridiales|f__Ruminococcaceae|g__Ruminococcaceae_unclassified|s__Clostridium_methylpentosum|t__SGB14962	0	0	0	0	0	0	0.02816	0	0	0	0	0	0.00084	0	0	0	0	0
k__Bacteria|p__Firmicutes|c__Clostridia|o__Clostridiales|f__Lachnospiraceae|g__Blautia|s__Blautia_faecis|t__SGB4820	0	0.38795	0.25932	0	0.0164	0.04444	0	0	0.04062	0.0589489	0	0	0	0	0	0	0	0
k__Bacteria|p__Firmicutes|c__Bacilli|o__Lactobacillales|f__Enterococcaceae|g__Enterococcus|s__Enterococcus_faecium|t__SGB7967	0	0	0	0	0	0	0	0	0	0	0	0	0	0	0	0	0.88021	0.151282
k__Bacteria|p__Firmicutes|c__Clostridia|o__Clostridiales|f__Lachnospiraceae|g__Blautia|s__Blautia_SGB4805|t__SGB4805	0.03213	0	0	0	0	0	0	0	0	0	0	0	0	0	0	0	0	0
k__Bacteria|p__Firmicutes|c__Clostridia|o__Clostridiales|f__Lachnospiraceae|g__Faecalicatena|s__Faecalicatena_contorta|t__SGB4613	0	0	0	0	0	0	0	0	0.04988	0	0	0	0	0	0	0.06091	0.0225	0
k__Bacteria|p__Firmicutes|c__Clostridia|o__Clostridiales|f__Clostridiales_unclassified|g__Intestinimonas|s__Intestinimonas_butyriciproducens|t__SGB15126	0	0	0	0	0	0	0	0	0	0	0	0	0	0	0.02867	0.01081	0	0
k__Bacteria|p__Actinobacteria|c__Coriobacteriia|o__Eggerthellales|f__Eggerthellaceae|g__Eggerthella|s__Eggerthella_lenta|t__SGB14809	0	0	0	0	0.35903	0	0	0	0	0	0.15285	0	0.03052	0	1.19302	0.086	0	0
k__Bacteria|p__Firmicutes|c__Clostridia|o__Clostridiales|f__Ruminococcaceae|g__GGB9621|s__GGB9621_SGB15073|t__SGB15073	0	0	0	0	0	0	0	0	1.33087	0	0	0	0	0	0	0	0.06472	0
k__Bacteria|p__Firmicutes|c__Clostridia|o__Clostridiales|f__Clostridiaceae|g__Hungatella|s__Hungatella_hathewayi|t__SGB4741	0	0	0	0	0	0	0	0	0	0	0	0	0.19936	0.4561	0	0.31931	0	0
k__Bacteria|p__Actinobacteria|c__Coriobacteriia|o__Coriobacteriales|f__Coriobacteriaceae|g__Collinsella|s__Collinsella_SGB14754|t__SGB14754	0	0	0	0	0	0	0	0	0	0	0	0	0.05692	0	0	0	0	0
k__Bacteria|p__Firmicutes|c__Clostridia|o__Clostridiales|f__Ruminococcaceae|g__GGB3343|s__GGB3343_SGB4423|t__SGB4423	1.20917	0	0	0	3.16469	0	0.07623	0	0	0	0	0	0	0	0	0	0	0
k__Bacteria|p__Firmicutes|c__Clostridia|o__Clostridiales|f__Lachnospiraceae|g__Lacrimispora|s__Lacrimispora_saccharolytica|t__SGB4701	0	0	0	0	0	0	0	0	0	0	0.40872	0	0	0	0	0	0.34492	0
k__Bacteria|p__Firmicutes|c__Clostridia|o__Clostridiales|f__Lachnospiraceae|g__Lacrimispora|s__Lacrimispora_celerecrescens|t__SGB4868	0.02383	0.06358	0.18727	0	0	0	0	0	0	0	0	0	0	0	0	0	0	0
k__Bacteria|p__Actinobacteria|c__CFGB9370|o__OFGB9370|f__FGB9370|g__GGB51959|s__GGB51959_SGB72479|t__SGB72479	0	0	0	0	0	0	0	0	0	0	0	0	0	0	0	0.01132	0	0
k__Bacteria|p__Firmicutes|c__Clostridia|o__Clostridiales|f__Clostridiaceae|g__Hungatella|s__Hungatella_hathewayi|t__SGB4742	0	0	0	0	0	0	0	0	0	0	0.026	0.1969	0.13278	0.00392	0	0.45311	0	0
k__Bacteria|p__Firmicutes|c__Bacilli|o__Bacilli_unclassified	0	0	0	0.22023	0	0	0	0	0	0	0	0	0.07906	0	0	0	0	0
k__Bacteria|p__Firmicutes|c__Bacilli|o__Bacilli_unclassified|f__Bacilli_unclassified	0	0	0	0.22023	0	0	0	0	0	0	0	0	0.07906	0	0	0	0	0
k__Bacteria|p__Firmicutes|c__Clostridia|o__Clostridiales|f__Lachnospiraceae|g__Anaerotignum	0	0	0	0	0.0656	0	0.84684	0	0	0	0	0	0.95057	0	0.08771	0.02557	0	0
k__Bacteria|p__Firmicutes|c__Clostridia|o__Clostridiales|f__Eubacteriaceae|g__Eubacteriaceae_unclassified	0	0	0	0.08191	0	0	0	0	0	0	0	0	0.40101	0	0.65668	0	0	0
k__Bacteria|p__Firmicutes|c__Clostridia|o__Clostridiales|f__Ruminococcaceae|g__Ruthenibacterium	0	0	0.10751	0	0	0	0	0	0.03903	0	0.18746	0	0.07055	0	0	0.02193	0.01878	0
k__Bacteria|p__Firmicutes|c__Bacilli|o__Bacilli_unclassified|f__Bacilli_unclassified|g__GGB4651	0	0	0	0.22023	0	0	0	0	0	0	0	0	0.07906	0	0	0	0	0
k__Bacteria|p__Firmicutes|c__Clostridia|o__Clostridia_unclassified|f__Clostridia_unclassified|g__Candidatus_Alloruminococcus	0	0	0	0	0	0	0	0	0	0	0	0	0.00653	0	0	0	0	0
k__Bacteria|p__Firmicutes|c__Clostridia|o__Clostridiales|f__Lachnospiraceae|g__Anaerotignum|s__Anaerotignum_faecicola	0	0	0	0	0.0656	0	0.84684	0	0	0	0	0	0.0341	0	0.08771	0.02557	0	0
k__Bacteria|p__Firmicutes|c__Clostridia|o__Clostridiales|f__Lachnospiraceae|g__Blautia|s__Blautia_sp_MSK_21_1	0.01664	0	0.02263	0	0	0.12166	0	0	0	0	0	0	0	0	0	0	0	0
k__Bacteria|p__Firmicutes|c__Clostridia|o__Clostridiales|f__Eubacteriaceae|g__Eubacterium|s__Eubacterium_ramulus	0	0	0.12021	0	0.63277	0.2197	0.00226	0	0	0	0	0	0	0	1.30751	0	0.20877	0
k__Bacteria|p__Firmicutes|c__Clostridia|o__Clostridiales|f__Eubacteriaceae|g__Eubacteriaceae_unclassified|s__Eubacteriaceae_bacterium	0	0	0	0.08191	0	0	0	0	0	0	0	0	0.40101	0	0.65668	0	0	0
k__Bacteria|p__Firmicutes|c__Clostridia|o__Clostridiales|f__Ruminococcaceae|g__Ruthenibacterium|s__Ruthenibacterium_lactatiformans	0	0	0.10751	0	0	0	0	0	0.03903	0	0.18746	0	0.07055	0	0	0.02193	0.01878	0
k__Bacteria|p__Firmicutes|c__Bacilli|o__Bacilli_unclassified|f__Bacilli_unclassified|g__GGB4651|s__GGB4651_SGB6438	0	0	0	0.22023	0	0	0	0	0	0	0	0	0.07906	0	0	0	0	0
k__Bacteria|p__Firmicutes|c__Clostridia|o__Clostridiales|f__Ruminococcaceae|g__Anaerotruncus|s__Anaerotruncus_rubiinfantis	0	0	0	0	0	0	0	0	0	0	0.01491	0	0.0237	0	0	0	0	0
k__Bacteria|p__Firmicutes|c__Clostridia|o__Clostridia_unclassified|f__Clostridia_unclassified|g__Candidatus_Alloruminococcus|s__Candidatus_Alloruminococcus_vanvlietii	0	0	0	0	0	0	0	0	0	0	0	0	0.00653	0	0	0	0	0
k__Bacteria|p__Firmicutes|c__Clostridia|o__Clostridiales|f__Lachnospiraceae|g__Anaerotignum|s__Anaerotignum_faecicola|t__SGB5190	0	0	0	0	0.0656	0	0.84684	0	0	0	0	0	0.0341	0	0.08771	0.02557	0	0
k__Bacteria|p__Firmicutes|c__Clostridia|o__Clostridiales|f__Lachnospiraceae|g__Blautia|s__Blautia_sp_MSK_21_1|t__SGB4829	0.01664	0	0.02263	0	0	0.12166	0	0	0	0	0	0	0	0	0	0	0	0
k__Bacteria|p__Firmicutes|c__Clostridia|o__Clostridiales|f__Eubacteriaceae|g__Eubacterium|s__Eubacterium_ramulus|t__SGB4959	0	0	0.12021	0	0.63277	0.2197	0.00226	0	0	0	0	0	0	0	1.30751	0	0.20877	0
k__Bacteria|p__Firmicutes|c__Clostridia|o__Clostridiales|f__Eubacteriaceae|g__Eubacteriaceae_unclassified|s__Eubacteriaceae_bacterium|t__SGB3958	0	0	0	0.08191	0	0	0	0	0	0	0	0	0.40101	0	0.50704	0	0	0
k__Bacteria|p__Firmicutes|c__Clostridia|o__Clostridiales|f__Lachnospiraceae|g__Lachnospiraceae_unclassified|s__Lachnospiraceae_bacterium|t__SGB4953	0.11352	0	0.06302	0	0	0	0	0	0	0	0	0	0	0	0	0	0	0
k__Bacteria|p__Firmicutes|c__Clostridia|o__Clostridiales|f__Ruminococcaceae|g__Ruthenibacterium|s__Ruthenibacterium_lactatiformans|t__SGB15271	0	0	0.10751	0	0	0	0	0	0.03903	0	0.18746	0	0.07055	0	0	0.02193	0.01878	0
k__Bacteria|p__Firmicutes|c__Bacilli|o__Bacilli_unclassified|f__Bacilli_unclassified|g__GGB4651|s__GGB4651_SGB6438|t__SGB6438	0	0	0	0.22023	0	0	0	0	0	0	0	0	0.07906	0	0	0	0	0
k__Bacteria|p__Firmicutes|c__Clostridia|o__Clostridiales|f__Ruminococcaceae|g__Anaerotruncus|s__Anaerotruncus_rubiinfantis|t__SGB25416	0	0	0	0	0	0	0	0	0	0	0.01491	0	0.0237	0	0	0	0	0
k__Bacteria|p__Firmicutes|c__Clostridia|o__Clostridia_unclassified|f__Clostridia_unclassified|g__Candidatus_Alloruminococcus|s__Candidatus_Alloruminococcus_vanvlietii|t__SGB63325	0	0	0	0	0	0	0	0	0	0	0	0	0.00653	0	0	0	0	0
k__Bacteria|p__Firmicutes|c__Bacilli|o__Lactobacillales|f__Enterococcaceae|g__Enterococcus|s__Enterococcus_casseliflavus	0	0	0	0	0	0	0	0	0	0	0	0	0	0	0	0	3.85283	0.0121691
k__Bacteria|p__Firmicutes|c__Clostridia|o__Clostridiales|f__Clostridiaceae|g__Clostridium|s__Clostridium_sp_AF36_4	0.35056	0.07293	0.91046	0	0	0	0	0	0	0	0	0	0	0	0	0	0	0
k__Bacteria|p__Firmicutes|c__Clostridia|o__Clostridiales|f__Ruminococcaceae|g__Ruminococcaceae_unclassified|s__Ruminococcaceae_unclassified_SGB4191	0.05563	0	0.22764	0	0	0	0	0	0	0	0	0	0	0	0	0	0	0
k__Bacteria|p__Firmicutes|c__Bacilli|o__Lactobacillales|f__Streptococcaceae|g__Streptococcus|s__Streptococcus_parasanguinis	0	0	0.12223	0	0	0	0	0	0	0	0	0	0	0	0	0	0	0
k__Bacteria|p__Firmicutes|c__Bacilli|o__Lactobacillales|f__Enterococcaceae|g__Enterococcus|s__Enterococcus_casseliflavus|t__SGB7952	0	0	0	0	0	0	0	0	0	0	0	0	0	0	0	0	3.85283	0.0121691
k__Bacteria|p__Firmicutes|c__Clostridia|o__Clostridiales|f__Clostridiaceae|g__Clostridium|s__Clostridium_sp_AF36_4|t__SGB4644	0.35056	0.07293	0.91046	0	0	0	0	0	0	0	0	0	0	0	0	0	0	0
k__Bacteria|p__Firmicutes|c__Clostridia|o__Clostridiales|f__Ruminococcaceae|g__Ruminococcaceae_unclassified|s__Ruminococcaceae_unclassified_SGB4191|t__SGB4191	0.05563	0	0.22764	0	0	0	0	0	0	0	0	0	0	0	0	0	0	0
k__Bacteria|p__Firmicutes|c__Bacilli|o__Lactobacillales|f__Streptococcaceae|g__Streptococcus|s__Streptococcus_parasanguinis|t__SGB8071	0	0	0.12223	0	0	0	0	0	0	0	0	0	0	0	0	0	0	0
k__Bacteria|p__Proteobacteria|c__Betaproteobacteria	0	1.56315	0.78954	0.38498	0	0.27602	0	0	1.22012	0	1.69768	0.83544	0.37826	0.03473	0	0	2.0794	0.269052
k__Bacteria|p__Firmicutes|c__CFGB11737	0	0	0	0	0	0	0	0	0.20636	0	0	0	0	0	0	0	0	0
k__Bacteria|p__Proteobacteria|c__Betaproteobacteria|o__Burkholderiales	0	1.56315	0.78954	0.38498	0	0.27602	0	0	1.22012	0	1.69768	0.83544	0.37826	0.03473	0	0	2.0794	0.269052
k__Bacteria|p__Firmicutes|c__CFGB11737|o__OFGB11737	0	0	0	0	0	0	0	0	0.20636	0	0	0	0	0	0	0	0	0
k__Bacteria|p__Proteobacteria|c__Betaproteobacteria|o__Burkholderiales|f__Sutterellaceae	0	1.56315	0.78954	0.38498	0	0.27602	0	0	1.22012	0	1.69768	0.83544	0.37826	0.03473	0	0	2.0794	0.269052
k__Bacteria|p__Firmicutes|c__CFGB11737|o__OFGB11737|f__FGB11737	0	0	0	0	0	0	0	0	0.20636	0	0	0	0	0	0	0	0	0
k__Bacteria|p__Firmicutes|c__Bacilli|o__Lactobacillales|f__Lactobacillaceae	0	0	0	0	0	0	0	0	0.01175	0	0	0	0	0	0	0	0	0
k__Bacteria|p__Bacteroidetes|c__Bacteroidia|o__Bacteroidales|f__Prevotellaceae|g__GGB1270	0	10.7253	0	0	8.57725	0	0	0	1.29363	0	0	0	0	0	2.59703	0	0	0
k__Bacteria|p__Proteobacteria|c__Betaproteobacteria|o__Burkholderiales|f__Sutterellaceae|g__Sutterella	0	1.56315	0.78954	0.38498	0	0.23018	0	0	1.22012	0	1.69768	0.83544	0.37826	0	0	0	1.95129	0
k__Bacteria|p__Firmicutes|c__Clostridia|o__Clostridia_unclassified|f__Clostridia_unclassified|g__GGB3817	0	0	0	0	0	0	0	0	1.04498	0	0	0	0	0	0	0	0	0
k__Bacteria|p__Firmicutes|c__Negativicutes|o__Veillonellales|f__Veillonellaceae|g__Allisonella	0	0	0	0	0	0	0	0	0.33348	0	0	0	0	0	0	0	0	0
k__Bacteria|p__Actinobacteria|c__Coriobacteriia|o__Coriobacteriales|f__Coriobacteriaceae|g__Senegalimassilia	0	0	0	0	0.23973	0.11873	0	0	0.29554	0	0	0	0	0	1.28022	0.11863	0.14151	0
k__Bacteria|p__Firmicutes|c__Clostridia|o__Clostridia_unclassified|f__Clostridia_unclassified|g__GGB2980	0	0	0	0	0	0	0	0	0.2278	0	0.81391	0	0	0	0	0	0	0
k__Bacteria|p__Proteobacteria|c__Deltaproteobacteria|o__Desulfovibrionales|f__Desulfovibrionaceae|g__Desulfovibrionaceae_unclassified	0	0.79089	0	0	0	0	0	0	0.21768	0	0	0	0	0	0	0	0	0
k__Bacteria|p__Firmicutes|c__CFGB11737|o__OFGB11737|f__FGB11737|g__GGB34228	0	0	0	0	0	0	0	0	0.20636	0	0	0	0	0	0	0	0	0
k__Bacteria|p__Firmicutes|c__Clostridia|o__Clostridiales|f__Ruminococcaceae|g__GGB9634	0	0.31783	0	0	0.41417	0	0	0	0.09624	0.0502126	0	0	0	0	1.60308	0.03455	0	0
k__Bacteria|p__Firmicutes|c__Clostridia|o__Clostridiales|f__Ruminococcaceae|g__GGB9730	0	0	0	0	0	0	0	0	0.07684	0.038282	0	0	0	0	0	0.00787	0	0
k__Bacteria|p__Bacteroidetes|c__Bacteroidia|o__Bacteroidales|f__Prevotellaceae|g__GGB1247	0	1.14422	0	0	0	0	0	0	0.06638	0	0	0	0	0	0	0	0	0
k__Bacteria|p__Firmicutes|c__Clostridia|o__Clostridiales|f__Ruminococcaceae|g__Angelakisella	0	0	0	0	0	0	0	0	0.04478	0	0	0	0	0	0	0	0	0
k__Bacteria|p__Firmicutes|c__Bacilli|o__Lactobacillales|f__Lactobacillaceae|g__Lacticaseibacillus	0	0	0	0	0	0	0	0	0.01175	0	0	0	0	0	0	0	0	0
k__Bacteria|p__Bacteroidetes|c__Bacteroidia|o__Bacteroidales|f__Tannerellaceae|g__Parabacteroides|s__Parabacteroides_merdae	0	0	0.12686	0.15025	0.30128	0	0	0	3.94307	0.00496577	0.88281	0.0346	0.61073	0	2.93851	0.11598	0	0
k__Bacteria|p__Bacteroidetes|c__Bacteroidia|o__Bacteroidales|f__Bacteroidaceae|g__Bacteroides|s__Bacteroides_caccae	0	0	0.68897	0	0	0	0	0	2.60898	0.0101877	1.03717	0.26481	0.1923	0	0	0	1.15467	0
k__Bacteria|p__Bacteroidetes|c__Bacteroidia|o__Bacteroidales|f__Bacteroidaceae|g__Bacteroides|s__Bacteroides_faecis	0	0	0	0	0.34687	0	0	0	1.97661	0	0	0	0	0	4.76548	0.02389	0	0
k__Bacteria|p__Firmicutes|c__Clostridia|o__Clostridiales|f__Lachnospiraceae|g__Dorea|s__Dorea_sp_AF24_7LB	0	0.2485	0	0.10622	0	0	0	0	1.4827	0	0	0	0.10111	0	0	0	0	0
k__Bacteria|p__Firmicutes|c__Clostridia|o__Clostridiales|f__Ruminococcaceae|g__GGB9633|s__GGB9633_SGB15090	0	2.20165	0.336	0	0	0	0	0	1.45448	0.287097	0	0.16737	0	0	0	0	0	0
k__Bacteria|p__Bacteroidetes|c__Bacteroidia|o__Bacteroidales|f__Prevotellaceae|g__GGB1270|s__GGB1270_SGB1705	0	10.7253	0	0	8.57725	0	0	0	1.29363	0	0	0	0	0	2.59703	0	0	0
k__Bacteria|p__Proteobacteria|c__Betaproteobacteria|o__Burkholderiales|f__Sutterellaceae|g__Sutterella|s__Sutterella_wadsworthensis	0	1.56315	0.78954	0.38498	0	0	0	0	1.22012	0	1.69768	0.83544	0.37826	0	0	0	0	0
k__Bacteria|p__Firmicutes|c__Clostridia|o__Clostridia_unclassified|f__Clostridia_unclassified|g__GGB3817|s__GGB3817_SGB5182	0	0	0	0	0	0	0	0	1.04498	0	0	0	0	0	0	0	0	0
k__Bacteria|p__Firmicutes|c__Bacilli|o__Lactobacillales|f__Enterococcaceae|g__Enterococcus|s__Enterococcus_faecalis	0	0	0	0	0	0	0	0	0.88633	0	0	0	0	0	0	0	0	0
k__Bacteria|p__Firmicutes|c__Clostridia|o__Clostridiales|f__Ruminococcaceae|g__Ruminococcus|s__Ruminococcus_sp_NSJ_71	0	2.0825	3.17545	0	0	0	0	0	0.79947	0.688912	1.00896	0.80061	0	0	0	0	0	0
k__Bacteria|p__Bacteroidetes|c__Bacteroidia|o__Bacteroidales|f__Bacteroidaceae|g__Bacteroides|s__Bacteroides_fragilis	0	0	0	0	0	0	0	0	0.74662	0	0	0	0	0	0	0	0	0
k__Bacteria|p__Firmicutes|c__Clostridia|o__Clostridiales|f__Ruminococcaceae|g__Ruminococcaceae_unclassified|s__Ruminococcaceae_bacterium	0	0.2387	0.01533	0	0	0	0	0	0.74647	0.147209	0.02634	0	0	0	0	0	0	0
k__Bacteria|p__Bacteroidetes|c__Bacteroidia|o__Bacteroidales|f__Bacteroidaceae|g__Bacteroides|s__Bacteroides_clarus	0	0	0	0	0	0	0	0	0.70031	0	0	0	0	0	0	0	0	0
k__Bacteria|p__Actinobacteria|c__Actinobacteria|o__Bifidobacteriales|f__Bifidobacteriaceae|g__Bifidobacterium|s__Bifidobacterium_catenulatum	0	0	0.34945	0	0	0	0	0	0.55101	0.0383602	1.93421	1.6765	0	0	0	0	0	0
k__Bacteria|p__Firmicutes|c__Negativicutes|o__Veillonellales|f__Veillonellaceae|g__Allisonella|s__Allisonella_histaminiformans	0	0	0	0	0	0	0	0	0.33348	0	0	0	0	0	0	0	0	0
k__Bacteria|p__Actinobacteria|c__Coriobacteriia|o__Coriobacteriales|f__Coriobacteriaceae|g__Senegalimassilia|s__Senegalimassilia_anaerobia	0	0	0	0	0.23973	0.11873	0	0	0.29554	0	0	0	0	0	1.28022	0.11863	0.14151	0
k__Bacteria|p__Firmicutes|c__Clostridia|o__Clostridia_unclassified|f__Clostridia_unclassified|g__GGB2980|s__GGB2980_SGB3962	0	0	0	0	0	0	0	0	0.2278	0	0.81391	0	0	0	0	0	0	0
k__Bacteria|p__Proteobacteria|c__Deltaproteobacteria|o__Desulfovibrionales|f__Desulfovibrionaceae|g__Desulfovibrionaceae_unclassified|s__Desulfovibrionaceae_bacterium	0	0.79089	0	0	0	0	0	0	0.21768	0	0	0	0	0	0	0	0	0
k__Bacteria|p__Firmicutes|c__CFGB11737|o__OFGB11737|f__FGB11737|g__GGB34228|s__GGB34228_SGB72916	0	0	0	0	0	0	0	0	0.20636	0	0	0	0	0	0	0	0	0
k__Bacteria|p__Actinobacteria|c__Coriobacteriia|o__Eggerthellales|f__Eggerthellaceae|g__Slackia|s__Slackia_piriformis	0	0	0	0	0	0	0	0	0.14039	0	0	0	0	0	0	0	0	0
k__Bacteria|p__Bacteroidetes|c__Bacteroidia|o__Bacteroidales|f__Bacteroidaceae|g__Bacteroides|s__Bacteroides_salyersiae	0	0	0	0	0	0	0	0	0.13858	0	0	0	0	0	0.20206	0.00202	0	0
k__Bacteria|p__Firmicutes|c__Clostridia|o__Clostridiales|f__Ruminococcaceae|g__GGB9634|s__GGB9634_SGB15093	0	0.31783	0	0	0.41417	0	0	0	0.09624	0.0502126	0	0	0	0	1.60308	0.03455	0	0
k__Bacteria|p__Firmicutes|c__Negativicutes|o__Acidaminococcales|f__Acidaminococcaceae|g__Phascolarctobacterium|s__Phascolarctobacterium_succinatutens	0	0.90113	0	0	0	0	0	0	0.09318	0	0	0	0	0	0	0	0	0
k__Bacteria|p__Firmicutes|c__Clostridia|o__Clostridiales|f__Ruminococcaceae|g__GGB9730|s__GGB9730_SGB15291	0	0	0	0	0	0	0	0	0.07684	0.038282	0	0	0	0	0	0.00787	0	0
k__Bacteria|p__Bacteroidetes|c__Bacteroidia|o__Bacteroidales|f__Prevotellaceae|g__GGB1247|s__GGB1247_SGB1668	0	1.14422	0	0	0	0	0	0	0.06638	0	0	0	0	0	0	0	0	0
k__Bacteria|p__Bacteroidetes|c__Bacteroidia|o__Bacteroidales|f__Rikenellaceae|g__Alistipes|s__Alistipes_indistinctus	0	0.1114	0	0.00158	0	0	0	0	0.05427	0	0	0	0	0	0	0	0	0
k__Bacteria|p__Actinobacteria|c__Coriobacteriia|o__Coriobacteriia_unclassified|f__Coriobacteriia_unclassified|g__Coriobacteriia_unclassified|s__Coriobacteriia_bacterium	0	0.03359	0.37511	0	0	0	0	0	0.04707	0.0141147	0.06253	0.1953	0	0	0	0	0	0
k__Bacteria|p__Firmicutes|c__Clostridia|o__Clostridiales|f__Ruminococcaceae|g__Angelakisella|s__Angelakisella_massiliensis	0	0	0	0	0	0	0	0	0.04478	0	0	0	0	0	0	0	0	0
k__Bacteria|p__Firmicutes|c__Clostridia|o__Clostridiales|f__Lachnospiraceae|g__Blautia|s__Blautia_sp_MSK_20_85	0	1.45715	0.67479	0	0	2.64362	0	0	0.0446	0.286265	0	0	0	0	0	0	0.00916	0.0929499
k__Bacteria|p__Firmicutes|c__Bacilli|o__Lactobacillales|f__Enterococcaceae|g__Enterococcus|s__Enterococcus_avium	0	0	0	0	0	0	0	0	0.04088	0.64306	0	0	0	0	0	0	0	0
k__Bacteria|p__Bacteroidetes|c__Bacteroidia|o__Bacteroidales|f__Bacteroidaceae|g__Bacteroides|s__Bacteroides_finegoldii	0	0	0	0	0	0	0	0	0.03054	0	0	0	0	0	0.44065	0.01445	0.21294	0
k__Bacteria|p__Bacteroidetes|c__Bacteroidia|o__Bacteroidales|f__Rikenellaceae|g__Alistipes|s__Alistipes_dispar	0	0	0	0.04114	0	0	0	0	0.01699	0	0	0	0	0	0	0	0	0
k__Bacteria|p__Firmicutes|c__Bacilli|o__Lactobacillales|f__Lactobacillaceae|g__Lacticaseibacillus|s__Lacticaseibacillus_paracasei	0	0	0	0	0	0	0	0	0.01175	0	0	0	0	0	0	0	0	0
k__Bacteria|p__Firmicutes|c__Clostridia|o__Clostridiales|f__Lachnospiraceae|g__Blautia|s__Blautia_SGB4831	0	0.29965	0	0	0.00851	0	0	0	0.00992	0.0303353	0	0	0	0	0	0	0	0
k__Bacteria|p__Bacteroidetes|c__Bacteroidia|o__Bacteroidales|f__Tannerellaceae|g__Parabacteroides|s__Parabacteroides_merdae|t__SGB1949	0	0	0.12686	0.15025	0.30128	0	0	0	3.94307	0.00496577	0.88281	0.0346	0.61073	0	2.93851	0.11598	0	0
k__Bacteria|p__Bacteroidetes|c__Bacteroidia|o__Bacteroidales|f__Bacteroidaceae|g__Bacteroides|s__Bacteroides_caccae|t__SGB1877	0	0	0.68897	0	0	0	0	0	2.60898	0.0101877	1.03717	0.26481	0.1923	0	0	0	1.15467	0
k__Bacteria|p__Bacteroidetes|c__Bacteroidia|o__Bacteroidales|f__Bacteroidaceae|g__Bacteroides|s__Bacteroides_faecis|t__SGB1860	0	0	0	0	0.34687	0	0	0	1.97661	0	0	0	0	0	4.76548	0.02389	0	0
k__Bacteria|p__Firmicutes|c__Clostridia|o__Clostridiales|f__Lachnospiraceae|g__Dorea|s__Dorea_sp_AF24_7LB|t__SGB4571	0	0.2485	0	0.10622	0	0	0	0	1.4827	0	0	0	0.10111	0	0	0	0	0
k__Bacteria|p__Firmicutes|c__Clostridia|o__Clostridiales|f__Ruminococcaceae|g__GGB9633|s__GGB9633_SGB15090|t__SGB15090	0	2.20165	0.336	0	0	0	0	0	1.45448	0.287097	0	0.16737	0	0	0	0	0	0
k__Bacteria|p__Bacteroidetes|c__Bacteroidia|o__Bacteroidales|f__Prevotellaceae|g__GGB1270|s__GGB1270_SGB1705|t__SGB1705	0	10.7253	0	0	8.57725	0	0	0	1.29363	0	0	0	0	0	2.59703	0	0	0
k__Bacteria|p__Firmicutes|c__Clostridia|o__Clostridia_unclassified|f__Clostridia_unclassified|g__GGB3817|s__GGB3817_SGB5182|t__SGB5182	0	0	0	0	0	0	0	0	1.04498	0	0	0	0	0	0	0	0	0
k__Bacteria|p__Proteobacteria|c__Betaproteobacteria|o__Burkholderiales|f__Sutterellaceae|g__Sutterella|s__Sutterella_wadsworthensis|t__SGB9283	0	0	0.18595	0	0	0	0	0	0.90118	0	1.69768	0.83544	0	0	0	0	0	0
k__Bacteria|p__Firmicutes|c__Bacilli|o__Lactobacillales|f__Enterococcaceae|g__Enterococcus|s__Enterococcus_faecalis|t__SGB7962	0	0	0	0	0	0	0	0	0.88633	0	0	0	0	0	0	0	0	0
k__Bacteria|p__Firmicutes|c__Clostridia|o__Clostridiales|f__Ruminococcaceae|g__Ruminococcus|s__Ruminococcus_sp_NSJ_71|t__SGB4290	0	2.0825	3.17545	0	0	0	0	0	0.79947	0.688912	1.00896	0.80061	0	0	0	0	0	0
k__Bacteria|p__Bacteroidetes|c__Bacteroidia|o__Bacteroidales|f__Bacteroidaceae|g__Bacteroides|s__Bacteroides_fragilis|t__SGB1855_group	0	0	0	0	0	0	0	0	0.74662	0	0	0	0	0	0	0	0	0
k__Bacteria|p__Bacteroidetes|c__Bacteroidia|o__Bacteroidales|f__Bacteroidaceae|g__Bacteroides|s__Bacteroides_clarus|t__SGB1832	0	0	0	0	0	0	0	0	0.70031	0	0	0	0	0	0	0	0	0
k__Bacteria|p__Actinobacteria|c__Actinobacteria|o__Bifidobacteriales|f__Bifidobacteriaceae|g__Bifidobacterium|s__Bifidobacterium_catenulatum|t__SGB17241	0	0	0.34945	0	0	0	0	0	0.55101	0.0383602	1.93421	1.6765	0	0	0	0	0	0
k__Bacteria|p__Firmicutes|c__Negativicutes|o__Veillonellales|f__Veillonellaceae|g__Allisonella|s__Allisonella_histaminiformans|t__SGB5843	0	0	0	0	0	0	0	0	0.33348	0	0	0	0	0	0	0	0	0
k__Bacteria|p__Proteobacteria|c__Betaproteobacteria|o__Burkholderiales|f__Sutterellaceae|g__Sutterella|s__Sutterella_wadsworthensis|t__SGB9286	0	1.56315	0.6036	0.38498	0	0	0	0	0.31895	0	0	0	0.37826	0	0	0	0	0
k__Bacteria|p__Firmicutes|c__Clostridia|o__Clostridiales|f__Ruminococcaceae|g__Ruminococcaceae_unclassified|s__Ruminococcaceae_bacterium|t__SGB15356	0	0.2387	0	0	0	0	0	0	0.30591	0.147209	0	0	0	0	0	0	0	0
k__Bacteria|p__Actinobacteria|c__Coriobacteriia|o__Coriobacteriales|f__Coriobacteriaceae|g__Senegalimassilia|s__Senegalimassilia_anaerobia|t__SGB14824_group	0	0	0	0	0.23973	0.11873	0	0	0.29554	0	0	0	0	0	1.28022	0.11863	0.14151	0
k__Bacteria|p__Firmicutes|c__Clostridia|o__Clostridiales|f__Ruminococcaceae|g__Ruminococcaceae_unclassified|s__Ruminococcaceae_bacterium|t__SGB14869	0	0	0	0	0	0	0	0	0.25639	0	0.02634	0	0	0	0	0	0	0
k__Bacteria|p__Firmicutes|c__Clostridia|o__Clostridia_unclassified|f__Clostridia_unclassified|g__GGB2980|s__GGB2980_SGB3962|t__SGB3962	0	0	0	0	0	0	0	0	0.2278	0	0.81391	0	0	0	0	0	0	0
k__Bacteria|p__Firmicutes|c__CFGB11737|o__OFGB11737|f__FGB11737|g__GGB34228|s__GGB34228_SGB72916|t__SGB72916	0	0	0	0	0	0	0	0	0.20636	0	0	0	0	0	0	0	0	0
k__Bacteria|p__Firmicutes|c__Clostridia|o__Clostridiales|f__Ruminococcaceae|g__Ruminococcaceae_unclassified|s__Ruminococcaceae_bacterium|t__SGB15249	0	0	0.01533	0	0	0	0	0	0.18418	0	0	0	0	0	0	0	0	0
k__Bacteria|p__Proteobacteria|c__Deltaproteobacteria|o__Desulfovibrionales|f__Desulfovibrionaceae|g__Desulfovibrionaceae_unclassified|s__Desulfovibrionaceae_bacterium|t__SGB15447	0	0.77864	0	0	0	0	0	0	0.14864	0	0	0	0	0	0	0	0	0
k__Bacteria|p__Actinobacteria|c__Coriobacteriia|o__Eggerthellales|f__Eggerthellaceae|g__Slackia|s__Slackia_piriformis|t__SGB14779	0	0	0	0	0	0	0	0	0.14039	0	0	0	0	0	0	0	0	0
k__Bacteria|p__Bacteroidetes|c__Bacteroidia|o__Bacteroidales|f__Bacteroidaceae|g__Bacteroides|s__Bacteroides_salyersiae|t__SGB1857	0	0	0	0	0	0	0	0	0.13858	0	0	0	0	0	0.20206	0.00202	0	0
k__Bacteria|p__Firmicutes|c__Clostridia|o__Clostridiales|f__Clostridiaceae|g__Clostridiaceae_unclassified|s__Clostridiaceae_bacterium|t__SGB4721	0	0	0	0.04751	0	0	0	0	0.1274	0	0	0	0.32306	0	0	0.0093	0	0
k__Bacteria|p__Firmicutes|c__Clostridia|o__Clostridiales|f__Ruminococcaceae|g__GGB9634|s__GGB9634_SGB15093|t__SGB15093	0	0.31783	0	0	0.41417	0	0	0	0.09624	0.0502126	0	0	0	0	1.60308	0.03455	0	0
k__Bacteria|p__Firmicutes|c__Negativicutes|o__Acidaminococcales|f__Acidaminococcaceae|g__Phascolarctobacterium|s__Phascolarctobacterium_succinatutens|t__SGB5765_group	0	0.90113	0	0	0	0	0	0	0.09318	0	0	0	0	0	0	0	0	0
k__Bacteria|p__Firmicutes|c__Clostridia|o__Clostridiales|f__Ruminococcaceae|g__GGB9730|s__GGB9730_SGB15291|t__SGB15291	0	0	0	0	0	0	0	0	0.07684	0.038282	0	0	0	0	0	0.00787	0	0
k__Bacteria|p__Proteobacteria|c__Deltaproteobacteria|o__Desulfovibrionales|f__Desulfovibrionaceae|g__Desulfovibrionaceae_unclassified|s__Desulfovibrionaceae_bacterium|t__SGB15460	0	0.01225	0	0	0	0	0	0	0.06904	0	0	0	0	0	0	0	0	0
k__Bacteria|p__Bacteroidetes|c__Bacteroidia|o__Bacteroidales|f__Prevotellaceae|g__GGB1247|s__GGB1247_SGB1668|t__SGB1668	0	1.14422	0	0	0	0	0	0	0.06638	0	0	0	0	0	0	0	0	0
k__Bacteria|p__Bacteroidetes|c__Bacteroidia|o__Bacteroidales|f__Rikenellaceae|g__Alistipes|s__Alistipes_indistinctus|t__SGB2325	0	0.1114	0	0.00158	0	0	0	0	0.05427	0	0	0	0	0	0	0	0	0
k__Bacteria|p__Actinobacteria|c__Coriobacteriia|o__Coriobacteriia_unclassified|f__Coriobacteriia_unclassified|g__Coriobacteriia_unclassified|s__Coriobacteriia_bacterium|t__SGB14770	0	0.03359	0.37511	0	0	0	0	0	0.04707	0.0141147	0.06253	0.1953	0	0	0	0	0	0
k__Bacteria|p__Firmicutes|c__Clostridia|o__Clostridiales|f__Ruminococcaceae|g__Angelakisella|s__Angelakisella_massiliensis|t__SGB29321	0	0	0	0	0	0	0	0	0.04478	0	0	0	0	0	0	0	0	0
k__Bacteria|p__Firmicutes|c__Clostridia|o__Clostridiales|f__Lachnospiraceae|g__Blautia|s__Blautia_sp_MSK_20_85|t__SGB4828_group	0	1.45715	0.67479	0	0	2.64362	0	0	0.0446	0.286265	0	0	0	0	0	0	0.00916	0.0929499
k__Bacteria|p__Firmicutes|c__Bacilli|o__Lactobacillales|f__Enterococcaceae|g__Enterococcus|s__Enterococcus_avium|t__SGB7931	0	0	0	0	0	0	0	0	0.04088	0.64306	0	0	0	0	0	0	0	0
k__Bacteria|p__Bacteroidetes|c__Bacteroidia|o__Bacteroidales|f__Bacteroidaceae|g__Bacteroides|s__Bacteroides_finegoldii|t__SGB1862	0	0	0	0	0	0	0	0	0.03054	0	0	0	0	0	0.44065	0.01445	0.21294	0
k__Bacteria|p__Bacteroidetes|c__Bacteroidia|o__Bacteroidales|f__Rikenellaceae|g__Alistipes|s__Alistipes_dispar|t__SGB2311	0	0	0	0.04114	0	0	0	0	0.01699	0	0	0	0	0	0	0	0	0
k__Bacteria|p__Firmicutes|c__Bacilli|o__Lactobacillales|f__Lactobacillaceae|g__Lacticaseibacillus|s__Lacticaseibacillus_paracasei|t__SGB7142	0	0	0	0	0	0	0	0	0.01175	0	0	0	0	0	0	0	0	0
k__Bacteria|p__Firmicutes|c__Clostridia|o__Clostridiales|f__Lachnospiraceae|g__Blautia|s__Blautia_SGB4831|t__SGB4831_group	0	0.29965	0	0	0.00851	0	0	0	0.00992	0.0303353	0	0	0	0	0	0	0	0
k__Bacteria|p__Actinobacteria|c__Coriobacteriia|o__Eggerthellales|f__Eggerthellaceae|g__Eggerthellaceae_unclassified|s__Eggerthellaceae_bacterium|t__SGB14325	0	0	0	0	0	0	0	0	0.0096	0	0	0	0	0	0	0	0	0
k__Bacteria|p__Proteobacteria|c__Alphaproteobacteria|o__Alphaproteobacteria_unclassified	0.28084	0	0	0	1.60955	0	0	0	0	0	0	0	0	0	0	0.01216	0	0
k__Bacteria|p__Proteobacteria|c__Alphaproteobacteria|o__Alphaproteobacteria_unclassified|f__Alphaproteobacteria_unclassified	0.28084	0	0	0	1.60955	0	0	0	0	0	0	0	0	0	0	0.01216	0	0
k__Bacteria|p__Proteobacteria|c__Alphaproteobacteria|o__Alphaproteobacteria_unclassified|f__Alphaproteobacteria_unclassified|g__GGB6612	0.28084	0	0	0	1.60123	0	0	0	0	0	0	0	0	0	0	0.01216	0	0
k__Bacteria|p__Firmicutes|c__Clostridia|o__Clostridiales|f__Ruminococcaceae|g__GGB9699	0.09047	0	0.18092	0	0	0	0	0	0	0	0	0	0	0	0	0	0	0
k__Bacteria|p__Firmicutes|c__Clostridia|o__Clostridiales|f__Lachnospiraceae|g__GGB3614	0.01272	0	0	0	0	0	0	0	0	0	0	0	0	0	0	0	0	0
k__Bacteria|p__Proteobacteria|c__Alphaproteobacteria|o__Alphaproteobacteria_unclassified|f__Alphaproteobacteria_unclassified|g__GGB6612|s__GGB6612_SGB9346	0.28084	0	0	0	1.60123	0	0	0	0	0	0	0	0	0	0	0.01216	0	0
k__Bacteria|p__Firmicutes|c__Clostridia|o__Clostridiales|f__Lachnospiraceae|g__Roseburia|s__Roseburia_sp_AF02_12	0.2705	3.8194	0	0	0	0	0	0	0	0	0	0	0	0	0	0	0	0
k__Bacteria|p__Firmicutes|c__Clostridia|o__Clostridiales|f__Lachnospiraceae|g__Roseburia|s__Roseburia_hominis	0.16415	0.03164	0.07426	0.09741	0.11236	0	0	0	0	0	0	0	0	0	0	0	0	0
k__Bacteria|p__Firmicutes|c__Clostridia|o__Clostridiales|f__Ruminococcaceae|g__GGB9699|s__GGB9699_SGB15216	0.09047	0	0.18092	0	0	0	0	0	0	0	0	0	0	0	0	0	0	0
k__Bacteria|p__Firmicutes|c__Bacilli|o__Lactobacillales|f__Streptococcaceae|g__Streptococcus|s__Streptococcus_thermophilus	0.08324	0.35432	0	0	0	0.30309	0	0	0	0	0	0	0	0	0	0	0	0
k__Bacteria|p__Firmicutes|c__Clostridia|o__Clostridiales|f__Lachnospiraceae|g__Roseburia|s__Roseburia_inulinivorans	0.03112	1.20496	0.1073	0	0	1.74071	0	0	0	0	0	0	0	0	0	0	0	0.0107141
k__Bacteria|p__Firmicutes|c__Clostridia|o__Clostridiales|f__Lachnospiraceae|g__GGB3614|s__GGB3614_SGB4886	0.01272	0	0	0	0	0	0	0	0	0	0	0	0	0	0	0	0	0
k__Bacteria|p__Firmicutes|c__Clostridia|o__Clostridiales|f__Ruminococcaceae|g__Faecalibacterium|s__Faecalibacterium_prausnitzii|t__SGB15317	0.36983	5.35783	0.07896	0.0034	1.51969	1.30709	0	0	0	0	0	0	0	0	0	0.06156	0	0
k__Bacteria|p__Proteobacteria|c__Alphaproteobacteria|o__Alphaproteobacteria_unclassified|f__Alphaproteobacteria_unclassified|g__GGB6612|s__GGB6612_SGB9346|t__SGB9346	0.28084	0	0	0	1.60123	0	0	0	0	0	0	0	0	0	0	0.01216	0	0
k__Bacteria|p__Firmicutes|c__Clostridia|o__Clostridiales|f__Lachnospiraceae|g__Roseburia|s__Roseburia_sp_AF02_12|t__SGB4938	0.2705	3.8194	0	0	0	0	0	0	0	0	0	0	0	0	0	0	0	0
k__Bacteria|p__Firmicutes|c__Clostridia|o__Clostridiales|f__Lachnospiraceae|g__Roseburia|s__Roseburia_hominis|t__SGB4936	0.16415	0.03164	0.07426	0.09741	0.11236	0	0	0	0	0	0	0	0	0	0	0	0	0
k__Bacteria|p__Firmicutes|c__Clostridia|o__Clostridiales|f__Lachnospiraceae|g__Lachnospiraceae_unclassified|s__Lachnospiraceae_bacterium|t__SGB4964	0.10555	0	0	0.16218	0	0	0	0	0	0	0	0	0	0	0	0	0	0
k__Bacteria|p__Firmicutes|c__Clostridia|o__Clostridiales|f__Ruminococcaceae|g__GGB9699|s__GGB9699_SGB15216|t__SGB15216	0.09047	0	0.18092	0	0	0	0	0	0	0	0	0	0	0	0	0	0	0
k__Bacteria|p__Firmicutes|c__Bacilli|o__Lactobacillales|f__Streptococcaceae|g__Streptococcus|s__Streptococcus_thermophilus|t__SGB8002	0.08324	0.35432	0	0	0	0.30309	0	0	0	0	0	0	0	0	0	0	0	0
k__Bacteria|p__Firmicutes|c__Clostridia|o__Clostridiales|f__Lachnospiraceae|g__Roseburia|s__Roseburia_inulinivorans|t__SGB4940	0.03112	1.20496	0.1073	0	0	1.74071	0	0	0	0	0	0	0	0	0	0	0	0.0107141
k__Bacteria|p__Firmicutes|c__Clostridia|o__Clostridiales|f__Lachnospiraceae|g__GGB3614|s__GGB3614_SGB4886|t__SGB4886	0.01272	0	0	0	0	0	0	0	0	0	0	0	0	0	0	0	0	0
k__Bacteria|p__Firmicutes|c__Clostridia|o__Clostridia_unclassified|f__Clostridia_unclassified|g__GGB3293	0	0.11412	0	0	0	0	0	0	0	0	0	0	0	0	0	0	0	0
k__Bacteria|p__Firmicutes|c__Clostridia|o__Clostridia_unclassified|f__Clostridia_unclassified|g__GGB3293|s__GGB3293_SGB4348	0	0.11412	0	0	0	0	0	0	0	0	0	0	0	0	0	0	0	0
k__Bacteria|p__Firmicutes|c__Clostridia|o__Clostridia_unclassified|f__Clostridia_unclassified|g__GGB3293|s__GGB3293_SGB4348|t__SGB4348	0	0.11412	0	0	0	0	0	0	0	0	0	0	0	0	0	0	0	0
k__Bacteria|p__Firmicutes|c__Clostridia|o__Clostridiales|f__Clostridiaceae|g__Clostridiaceae_unclassified|s__Clostridiaceae_unclassified_SGB4769	0	0	0	0	0	0	0	0	0	0	0	0	0	0	0	0	0.09833	0
k__Bacteria|p__Firmicutes|c__Clostridia|o__Clostridiales|f__Ruminococcaceae|g__Gemmiger|s__Gemmiger_SGB15299	0	0	0	0.15339	0	0	0	0	0	0	0	0	0	0	0	0	0	0
k__Bacteria|p__Firmicutes|c__Clostridia|o__Clostridiales|f__Clostridiaceae|g__Clostridiaceae_unclassified|s__Clostridiaceae_unclassified_SGB4769|t__SGB4769	0	0	0	0	0	0	0	0	0	0	0	0	0	0	0	0	0.09833	0
k__Bacteria|p__Firmicutes|c__Clostridia|o__Clostridiales|f__Ruminococcaceae|g__Gemmiger|s__Gemmiger_SGB15299|t__SGB15299	0	0	0	0.15339	0	0	0	0	0	0	0	0	0	0	0	0	0	0
k__Bacteria|p__Firmicutes|c__Clostridia|o__Clostridiales|f__Ruminococcaceae|g__Ruminococcus|s__Ruminococcus_callidus	0	5.65425	0	2.44397	0	0	0	0	0	0.256015	0	0	0	0	0	0	0	0
k__Bacteria|p__Firmicutes|c__Clostridia|o__Clostridiales|f__Ruminococcaceae|g__Ruminococcaceae_unclassified|s__Eubacterium_siraeum	0	0.05659	0.03178	0	0	0	0	0	0	0.0560819	0	0	0	0	0	0.02321	0	0
k__Bacteria|p__Proteobacteria|c__Gammaproteobacteria|o__Enterobacterales|f__Enterobacteriaceae|g__Kluyvera|s__Kluyvera_sichuanensis	0	0	0	0	0	0	0	0	0	0.00793242	0	0	0	0	0	0	0	0
k__Bacteria|p__Firmicutes|c__Clostridia|o__Clostridiales|f__Ruminococcaceae|g__Ruminococcus|s__Ruminococcus_callidus|t__SGB4422	0	5.65425	0	2.44397	0	0	0	0	0	0.256015	0	0	0	0	0	0	0	0
k__Bacteria|p__Firmicutes|c__Clostridia|o__Clostridiales|f__Ruminococcaceae|g__Ruminococcaceae_unclassified|s__Eubacterium_siraeum|t__SGB4198_group	0	0.05659	0.03178	0	0	0	0	0	0	0.0560819	0	0	0	0	0	0.02321	0	0
k__Bacteria|p__Proteobacteria|c__Gammaproteobacteria|o__Enterobacterales|f__Enterobacteriaceae|g__Kluyvera|s__Kluyvera_sichuanensis|t__SGB81752	0	0	0	0	0	0	0	0	0	0.00793242	0	0	0	0	0	0	0	0
k__Bacteria|p__Firmicutes|c__Clostridia|o__Clostridia_unclassified|f__Clostridia_unclassified|g__Candidatus_Avimicrobium	0	0	0	0.01188	0	0	0	0	0	0	0	0	0	0	0	0	0	0
k__Bacteria|p__Bacteroidetes|c__Bacteroidia|o__Bacteroidales|f__Prevotellaceae|g__GGB1266	0	1.93502	0	0	0	0	0	0	0	0	0	0	0	0	0	0	0	0
k__Bacteria|p__Firmicutes|c__Clostridia|o__Clostridiales|f__Lachnospiraceae|g__GGB3733	0	1.7733	0	0	0	0	0	0	0	0	0	0	0	0	0	0	0	0
k__Bacteria|p__Firmicutes|c__Clostridia|o__Clostridia_unclassified|f__Clostridia_unclassified|g__Candidatus_Avimicrobium|s__Candidatus_Avimicrobium_caecorum	0	0	0	0.01188	0	0	0	0	0	0	0	0	0	0	0	0	0	0
k__Bacteria|p__Bacteroidetes|c__Bacteroidia|o__Bacteroidales|f__Prevotellaceae|g__GGB1266|s__GGB1266_SGB1699	0	1.93502	0	0	0	0	0	0	0	0	0	0	0	0	0	0	0	0
k__Bacteria|p__Firmicutes|c__Clostridia|o__Clostridiales|f__Lachnospiraceae|g__GGB3733|s__GGB3733_SGB5066	0	1.7733	0	0	0	0	0	0	0	0	0	0	0	0	0	0	0	0
k__Bacteria|p__Firmicutes|c__Clostridia|o__Clostridia_unclassified|f__Clostridia_unclassified|g__Candidatus_Avimicrobium|s__Candidatus_Avimicrobium_caecorum|t__SGB15350	0	0	0	0.01188	0	0	0	0	0	0	0	0	0	0	0	0	0	0
k__Bacteria|p__Bacteroidetes|c__Bacteroidia|o__Bacteroidales|f__Prevotellaceae|g__GGB1266|s__GGB1266_SGB1699|t__SGB1699	0	1.93502	0	0	0	0	0	0	0	0	0	0	0	0	0	0	0	0
k__Bacteria|p__Firmicutes|c__Clostridia|o__Clostridiales|f__Clostridiaceae|g__Clostridiaceae_unclassified|s__Clostridiaceae_bacterium|t__SGB4770	0	0	0	0	0.01354	0	0	0	0	0	0	0	0	0	0	0	0	0
k__Bacteria|p__Firmicutes|c__Clostridia|o__Clostridiales|f__Lachnospiraceae|g__GGB3733|s__GGB3733_SGB5066|t__SGB5066	0	1.7733	0	0	0	0	0	0	0	0	0	0	0	0	0	0	0	0
k__Bacteria|p__Firmicutes|c__Clostridia|o__Clostridiales|f__Ruminococcaceae|g__Pseudoflavonifractor	0	0	0	0	0	0	0	0	0	0	0	0	0	0	0	0.00273	0	0
k__Bacteria|p__Firmicutes|c__Clostridia|o__Clostridiales|f__Ruminococcaceae|g__GGB9635	0	0	0.54135	0	0	0	0	0	0	0	0.01364	0.14008	0	0	0	0	0	0
k__Bacteria|p__Firmicutes|c__Clostridia|o__Clostridiales|f__Clostridiaceae|g__Clostridium|s__Clostridium_sp_AM33_3	0	0	0	0	0.13692	0	0	0	0	0	0	0	0	0	0	0	0.09458	0
k__Bacteria|p__Firmicutes|c__Clostridia|o__Clostridiales|f__Ruminococcaceae|g__GGB9635|s__GGB9635_SGB15106	0	0	0.54135	0	0	0	0	0	0	0	0.01364	0.14008	0	0	0	0	0	0
k__Bacteria|p__Firmicutes|c__Clostridia|o__Clostridiales|f__Clostridiaceae|g__Clostridium|s__Clostridium_sp_AM33_3|t__SGB4711	0	0	0	0	0.13692	0	0	0	0	0	0	0	0	0	0	0	0.09458	0
k__Bacteria|p__Firmicutes|c__Clostridia|o__Clostridiales|f__Ruminococcaceae|g__GGB9635|s__GGB9635_SGB15106|t__SGB15106	0	0	0.54135	0	0	0	0	0	0	0	0.01364	0.14008	0	0	0	0	0	0
k__Bacteria|p__Proteobacteria|c__Gammaproteobacteria|o__Enterobacterales|f__Hafniaceae	0	0	0	0	0	0	0	0	0	0	0	0	0	0	0	0	0.12055	0.489144
k__Bacteria|p__Proteobacteria|c__Gammaproteobacteria|o__Enterobacterales|f__Hafniaceae|g__Hafnia	0	0	0	0	0	0	0	0	0	0	0	0	0	0	0	0	0.12055	0.489144
k__Bacteria|p__Bacteroidetes|c__Bacteroidia|o__Bacteroidales|f__Tannerellaceae|g__GGB1407	0	0.08501	0	0	0	0	0	0	0	0	0	0	0	0	0	0	0	0
k__Bacteria|p__Firmicutes|c__Clostridia|o__Clostridiales|f__Lachnospiraceae|g__Lachnospiraceae_unclassified|s__Lachnospiraceae_bacterium_WCA3_601_WT_6H	0	2.16693	0.63627	0.06964	0	0	0	0	0	0	0	0	0	0	0	0	0	0
k__Bacteria|p__Firmicutes|c__Clostridia|o__Clostridiales|f__Lachnospiraceae|g__Roseburia|s__Roseburia_sp_AM59_24XD	0	1.86342	0	0	0	0	0	0	0	0	0	0	0	0	0	0	0	0
k__Bacteria|p__Firmicutes|c__Clostridia|o__Clostridiales|f__Lachnospiraceae|g__Coprococcus|s__Coprococcus_eutactus	0	6.64095	1.48923	2.96196	0	1.66341	0	0	0	0	0	0	0.12881	0	0	0	0	0
k__Bacteria|p__Bacteroidetes|c__Bacteroidia|o__Bacteroidales|f__Tannerellaceae|g__GGB1407|s__GGB1407_SGB1931	0	0.08501	0	0	0	0	0	0	0	0	0	0	0	0	0	0	0	0
k__Bacteria|p__Firmicutes|c__Clostridia|o__Clostridiales|f__Lachnospiraceae|g__Lachnospiraceae_unclassified|s__Lachnospiraceae_bacterium_WCA3_601_WT_6H|t__SGB4910	0	2.16693	0.63627	0.06964	0	0	0	0	0	0	0	0	0	0	0	0	0	0
k__Bacteria|p__Firmicutes|c__Clostridia|o__Clostridiales|f__Lachnospiraceae|g__Roseburia|s__Roseburia_sp_AM59_24XD|t__SGB4654	0	1.86342	0	0	0	0	0	0	0	0	0	0	0	0	0	0	0	0
k__Bacteria|p__Firmicutes|c__Clostridia|o__Clostridiales|f__Lachnospiraceae|g__Coprococcus|s__Coprococcus_eutactus|t__SGB5117	0	6.64095	1.48923	0	0	1.66341	0	0	0	0	0	0	0	0	0	0	0	0
k__Bacteria|p__Bacteroidetes|c__Bacteroidia|o__Bacteroidales|f__Tannerellaceae|g__GGB1407|s__GGB1407_SGB1931|t__SGB1931	0	0.08501	0	0	0	0	0	0	0	0	0	0	0	0	0	0	0	0
k__Bacteria|p__Firmicutes|c__Clostridia|o__Clostridiales|f__Clostridiaceae|g__Clostridiaceae_unclassified|s__Clostridiaceae_bacterium_OM08_6BH	0	0	0	0.02682	0.07477	0.00755	0	0	0	0	0	0	0	0	0	0	0.27348	0
k__Bacteria|p__Firmicutes|c__Clostridia|o__Clostridiales|f__Clostridiaceae|g__Clostridiaceae_unclassified|s__Clostridiaceae_bacterium_OM08_6BH|t__SGB4768	0	0	0	0.02682	0.07477	0.00755	0	0	0	0	0	0	0	0	0	0	0.27348	0
k__Bacteria|p__Firmicutes|c__Clostridia|o__Clostridiales|f__Lachnospiraceae|g__Lachnospiraceae_unclassified|s__Lachnospiraceae_bacterium|t__SGB48424	0	0	0	0	0	0	0	0	0	0	0.05405	0	0	0	0	0	0	0
k__Bacteria|p__Firmicutes|c__Clostridia|o__Clostridia_unclassified|f__Clostridia_unclassified|g__Clostridia_unclassified|s__Clostridia_bacterium|t__SGB53497	0	0	0	0	0	0	0	0	0	0	0	0	0	0	0	0.00516	0	0
k__Bacteria|p__Bacteroidetes|c__Bacteroidia|o__Bacteroidales|f__Prevotellaceae|g__Prevotella|s__Prevotella_copri_clade_A	0	1.34221	0	1.88195	0	0	0	0	0	0	0	0	0	0	0	0	0	0
k__Bacteria|p__Firmicutes|c__Clostridia|o__Clostridiales|f__Lachnospiraceae|g__Lachnospira|s__Lachnospira_SGB5076	0	1.13867	1.45914	0	0	2.51189	0	0	0	0	0	0	0	0	0	0	0	0
k__Bacteria|p__Firmicutes|c__Clostridia|o__Clostridiales|f__Lachnospiraceae|g__Roseburia|s__Roseburia_intestinalis	0	0.35399	1.20774	0.09514	0	3.6897	0	0	0	0	0	0	0	0	0	0	0	0
k__Bacteria|p__Bacteroidetes|c__Bacteroidia|o__Bacteroidales|f__Prevotellaceae|g__Prevotella|s__Prevotella_copri_clade_A|t__SGB1626	0	1.34221	0	1.88195	0	0	0	0	0	0	0	0	0	0	0	0	0	0
k__Bacteria|p__Firmicutes|c__Clostridia|o__Clostridiales|f__Lachnospiraceae|g__Lachnospira|s__Lachnospira_SGB5076|t__SGB5076	0	1.13867	1.45914	0	0	2.51189	0	0	0	0	0	0	0	0	0	0	0	0
k__Bacteria|p__Firmicutes|c__Clostridia|o__Clostridiales|f__Lachnospiraceae|g__Roseburia|s__Roseburia_intestinalis|t__SGB4951	0	0.35399	1.20774	0.09514	0	3.6897	0	0	0	0	0	0	0	0	0	0	0	0
k__Archaea	0	0	0	0	0	0	0	0	0	0	0.066	0	0.06214	0	0	0	0	0
k__Archaea|p__Euryarchaeota	0	0	0	0	0	0	0	0	0	0	0.066	0	0.06214	0	0	0	0	0
k__Archaea|p__Euryarchaeota|c__Methanobacteria	0	0	0	0	0	0	0	0	0	0	0.066	0	0.06214	0	0	0	0	0
k__Archaea|p__Euryarchaeota|c__Methanobacteria|o__Methanobacteriales	0	0	0	0	0	0	0	0	0	0	0.066	0	0.06214	0	0	0	0	0
k__Bacteria|p__Actinobacteria|c__Actinobacteria|o__Actinomycetales	0	0	0	0	0	0	0	0	0	0	0.01039	0	0	0	0	0	0	0
k__Archaea|p__Euryarchaeota|c__Methanobacteria|o__Methanobacteriales|f__Methanobacteriaceae	0	0	0	0	0	0	0	0	0	0	0.066	0	0.06214	0	0	0	0	0
k__Bacteria|p__Actinobacteria|c__Actinobacteria|o__Actinomycetales|f__Actinomycetaceae	0	0	0	0	0	0	0	0	0	0	0.01039	0	0	0	0	0	0	0
k__Bacteria|p__Firmicutes|c__Clostridia|o__Clostridiales|f__Ruminococcaceae|g__GGB9644	0	0	0.28821	0.41895	0	0	0	0	0	0	0.80646	0.03112	1.20986	0.26201	0	0	0	0
k__Archaea|p__Euryarchaeota|c__Methanobacteria|o__Methanobacteriales|f__Methanobacteriaceae|g__Methanobrevibacter	0	0	0	0	0	0	0	0	0	0	0.066	0	0.06214	0	0	0	0	0
k__Bacteria|p__Firmicutes|c__Clostridia|o__Clostridiales|f__Clostridiaceae|g__Butyricicoccus	0	0	0.06805	0	2.29009	0.1528	0	0	0	0	0.04298	0.03613	0	0	0.11723	0.1671	0	0
k__Bacteria|p__Actinobacteria|c__Actinobacteria|o__Actinomycetales|f__Actinomycetaceae|g__Schaalia	0	0	0	0	0	0	0	0	0	0	0.01039	0	0	0	0	0	0	0
k__Bacteria|p__Bacteroidetes|c__Bacteroidia|o__Bacteroidales|f__Bacteroidaceae|g__Bacteroides|s__Bacteroides_cellulosilyticus	0	0	0.60845	0.12575	0.00618	0	0	0	0	0	6.43118	0	1.22643	0	0.65626	0	1.94219	0
k__Bacteria|p__Proteobacteria|c__Gammaproteobacteria|o__Enterobacterales|f__Enterobacteriaceae|g__Citrobacter|s__Citrobacter_murliniae	0	0	0	0	0	0	0	0	0	0	3.88348	14.8137	0	0	0	0	0	0
k__Bacteria|p__Actinobacteria|c__Actinobacteria|o__Bifidobacteriales|f__Bifidobacteriaceae|g__Bifidobacterium|s__Bifidobacterium_bifidum	0	0	1.03426	2.90019	0	0	0	0	0	0	2.98423	4.97651	2.72771	2.90499	0	0	0	0
k__Bacteria|p__Firmicutes|c__Clostridia|o__Clostridiales|f__Ruminococcaceae|g__GGB9644|s__GGB9644_SGB15121	0	0	0.28821	0.41895	0	0	0	0	0	0	0.80646	0.03112	1.20986	0.26201	0	0	0	0
k__Bacteria|p__Actinobacteria|c__Actinobacteria|o__Bifidobacteriales|f__Bifidobacteriaceae|g__Bifidobacterium|s__Bifidobacterium_pseudocatenulatum	0	0	0.22625	0.01571	1.24029	0.33397	0	0	0	0	0.59464	0.13139	0.9297	0.04443	3.71564	0.70716	2.87532	0.971363
k__Bacteria|p__Proteobacteria|c__Gammaproteobacteria|o__Enterobacterales|f__Enterobacteriaceae|g__Escherichia|s__Escherichia_marmotae	0	0	0	0	0	0	0	0	0	0	0.32748	1.74494	0	0	0	0	0	0
k__Bacteria|p__Firmicutes|c__Clostridia|o__Clostridiales|f__Clostridiales_unclassified|g__Clostridiales_unclassified|s__Clostridiales_bacterium_1_7_47FAA	0	0	0	0	0	0	0	0	0	0	0.15713	0.26258	0	0	0	0	0	0
k__Bacteria|p__Verrucomicrobia|c__Verrucomicrobiae|o__Verrucomicrobiales|f__Akkermansiaceae|g__Akkermansia|s__Akkermansia_sp_KLE1605	0	0	0	0	0	0	0	0	0	0	0.11278	0	0	0	0	0	0	0
k__Archaea|p__Euryarchaeota|c__Methanobacteria|o__Methanobacteriales|f__Methanobacteriaceae|g__Methanobrevibacter|s__Methanobrevibacter_smithii	0	0	0	0	0	0	0	0	0	0	0.066	0	0.06214	0	0	0	0	0
k__Bacteria|p__Bacteroidetes|c__Bacteroidia|o__Bacteroidales|f__Rikenellaceae|g__Alistipes|s__Alistipes_ihumii	0	0	0.19308	0.06425	0	0	0	0	0	0	0.05437	0.02011	0.05717	0	0	0	0	0
k__Bacteria|p__Firmicutes|c__Clostridia|o__Clostridiales|f__Clostridiales_unclassified|g__Intestinimonas|s__Intestinimonas_massiliensis	0	0	0	0	0	0	0	0	0	0	0.05117	0	0.08111	0	0	0	0	0
k__Bacteria|p__Firmicutes|c__Clostridia|o__Clostridiales|f__Clostridiaceae|g__Butyricicoccus|s__Butyricicoccus_sp_AM29_23AC	0	0	0.06805	0	2.29009	0.1528	0	0	0	0	0.04298	0.03613	0	0	0.11723	0.1671	0	0
k__Bacteria|p__Bacteroidetes|c__Bacteroidia|o__Bacteroidales|f__Bacteroidaceae|g__Bacteroides|s__Bacteroides_nordii	0	0	0	0	0	0	0	0	0	0	0.02476	0	0	0	0	0	0.04144	0
k__Bacteria|p__Actinobacteria|c__Coriobacteriia|o__Eggerthellales|f__Eggerthellaceae|g__Gordonibacter|s__Gordonibacter_pamelaeae	0	0	0	0	0	0	0	0	0	0	0.01396	0	0	0	0.16151	0.02972	0	0
k__Bacteria|p__Firmicutes|c__Clostridia|o__Clostridiales|f__Oscillospiraceae|g__Oscillibacter|s__Oscillibacter_sp_NSJ_62	0	0	0	0	0	0	0	0	0	0	0.01261	0	0	0	0	0	0	0
k__Bacteria|p__Actinobacteria|c__Actinobacteria|o__Actinomycetales|f__Actinomycetaceae|g__Schaalia|s__Schaalia_turicensis	0	0	0	0	0	0	0	0	0	0	0.01039	0	0	0	0	0	0	0
k__Bacteria|p__Bacteroidetes|c__Bacteroidia|o__Bacteroidales|f__Bacteroidaceae|g__Bacteroides|s__Bacteroides_cellulosilyticus|t__SGB1844	0	0	0.60845	0.12575	0.00618	0	0	0	0	0	6.43118	0	1.22643	0	0.65626	0	1.94219	0
k__Bacteria|p__Proteobacteria|c__Gammaproteobacteria|o__Enterobacterales|f__Enterobacteriaceae|g__Citrobacter|s__Citrobacter_murliniae|t__SGB10087	0	0	0	0	0	0	0	0	0	0	3.88348	14.8137	0	0	0	0	0	0
k__Bacteria|p__Actinobacteria|c__Actinobacteria|o__Bifidobacteriales|f__Bifidobacteriaceae|g__Bifidobacterium|s__Bifidobacterium_bifidum|t__SGB17256	0	0	1.03426	2.90019	0	0	0	0	0	0	2.98423	4.97651	2.72771	2.90499	0	0	0	0
k__Bacteria|p__Firmicutes|c__Clostridia|o__Clostridiales|f__Ruminococcaceae|g__GGB9644|s__GGB9644_SGB15121|t__SGB15121	0	0	0.28821	0.41895	0	0	0	0	0	0	0.80646	0.03112	1.20986	0.26201	0	0	0	0
k__Bacteria|p__Actinobacteria|c__Actinobacteria|o__Bifidobacteriales|f__Bifidobacteriaceae|g__Bifidobacterium|s__Bifidobacterium_pseudocatenulatum|t__SGB17237	0	0	0.22625	0.01571	1.24029	0.33397	0	0	0	0	0.59464	0.13139	0.9297	0.04443	3.71564	0.70716	2.87532	0.971363
k__Bacteria|p__Proteobacteria|c__Gammaproteobacteria|o__Enterobacterales|f__Enterobacteriaceae|g__Escherichia|s__Escherichia_marmotae|t__SGB10064	0	0	0	0	0	0	0	0	0	0	0.32748	1.74494	0	0	0	0	0	0
k__Bacteria|p__Firmicutes|c__Clostridia|o__Clostridiales|f__Clostridiales_unclassified|g__Clostridiales_unclassified|s__Clostridiales_bacterium_1_7_47FAA|t__SGB4763	0	0	0	0	0	0	0	0	0	0	0.15713	0.26258	0	0	0	0	0	0
k__Bacteria|p__Verrucomicrobia|c__Verrucomicrobiae|o__Verrucomicrobiales|f__Akkermansiaceae|g__Akkermansia|s__Akkermansia_sp_KLE1605|t__SGB9224	0	0	0	0	0	0	0	0	0	0	0.11278	0	0	0	0	0	0	0
k__Archaea|p__Euryarchaeota|c__Methanobacteria|o__Methanobacteriales|f__Methanobacteriaceae|g__Methanobrevibacter|s__Methanobrevibacter_smithii|t__SGB714_group	0	0	0	0	0	0	0	0	0	0	0.066	0	0.06214	0	0	0	0	0
k__Bacteria|p__Bacteroidetes|c__Bacteroidia|o__Bacteroidales|f__Rikenellaceae|g__Alistipes|s__Alistipes_ihumii|t__SGB2328	0	0	0.19308	0.06425	0	0	0	0	0	0	0.05437	0.02011	0.05717	0	0	0	0	0
k__Bacteria|p__Firmicutes|c__Clostridia|o__Clostridiales|f__Clostridiales_unclassified|g__Intestinimonas|s__Intestinimonas_massiliensis|t__SGB15127	0	0	0	0	0	0	0	0	0	0	0.05117	0	0.08111	0	0	0	0	0
k__Bacteria|p__Firmicutes|c__Clostridia|o__Clostridiales|f__Clostridiaceae|g__Butyricicoccus|s__Butyricicoccus_sp_AM29_23AC|t__SGB14991	0	0	0.06805	0	2.29009	0.1528	0	0	0	0	0.04298	0.03613	0	0	0.11723	0.1671	0	0
k__Bacteria|p__Bacteroidetes|c__Bacteroidia|o__Bacteroidales|f__Bacteroidaceae|g__Bacteroides|s__Bacteroides_nordii|t__SGB1858	0	0	0	0	0	0	0	0	0	0	0.02476	0	0	0	0	0	0.04144	0
k__Bacteria|p__Actinobacteria|c__Coriobacteriia|o__Eggerthellales|f__Eggerthellaceae|g__Eggerthellaceae_unclassified|s__Eggerthellaceae_bacterium|t__SGB14334	0	0	0.28597	0	0	0.40172	0	0	0	0	0.02255	0.04156	0	0	0	0.00221	0.01049	0.00311786
k__Bacteria|p__Actinobacteria|c__Coriobacteriia|o__Eggerthellales|f__Eggerthellaceae|g__Gordonibacter|s__Gordonibacter_pamelaeae|t__SGB14807	0	0	0	0	0	0	0	0	0	0	0.01396	0	0	0	0.16151	0.02972	0	0
k__Bacteria|p__Firmicutes|c__Clostridia|o__Clostridiales|f__Oscillospiraceae|g__Oscillibacter|s__Oscillibacter_sp_NSJ_62|t__SGB79833	0	0	0	0	0	0	0	0	0	0	0.01261	0	0	0	0	0	0	0
k__Bacteria|p__Firmicutes|c__Clostridia|o__Clostridiales|f__Lachnospiraceae|g__Lachnospiraceae_unclassified|s__Lachnospiraceae_bacterium|t__SGB5062	0	0	1.55869	0	0	0	0	0	0	0	0.01244	0.07111	0	0	0	0	0	0
k__Bacteria|p__Actinobacteria|c__Actinobacteria|o__Actinomycetales|f__Actinomycetaceae|g__Schaalia|s__Schaalia_turicensis|t__SGB17195	0	0	0	0	0	0	0	0	0	0	0.01039	0	0	0	0	0	0	0
k__Bacteria|p__Firmicutes|c__Clostridia|o__Clostridiales|f__Clostridiales_unclassified|g__Clostridiales_unclassified|s__Clostridiales_unclassified_SGB15145	0	0	0	0	0.14132	0	0	0	0	0	0	0.27663	0	0	0	0.04695	0	0
k__Bacteria|p__Firmicutes|c__Clostridia|o__Clostridiales|f__Clostridiales_unclassified|g__Clostridiales_unclassified|s__Clostridiales_unclassified_SGB15145|t__SGB15145	0	0	0	0	0.14132	0	0	0	0	0	0	0.27663	0	0	0	0.04695	0	0
k__Bacteria|p__Firmicutes|c__Clostridia|o__Clostridiales|f__Lachnospiraceae|g__GGB3571	0	0	0	0	0.04868	0	0	0	0	0	0	0	0	0	0	0	0	0
k__Bacteria|p__Firmicutes|c__Clostridia|o__Clostridiales|f__Lachnospiraceae|g__GGB3571|s__GGB3571_SGB4778	0	0	0	0	0.04868	0	0	0	0	0	0	0	0	0	0	0	0	0
k__Bacteria|p__Firmicutes|c__Clostridia|o__Clostridiales|f__Lachnospiraceae|g__GGB3571|s__GGB3571_SGB4778|t__SGB4778	0	0	0	0	0.04868	0	0	0	0	0	0	0	0	0	0	0	0	0
k__Bacteria|p__Firmicutes|c__Clostridia|o__Clostridiales|f__Clostridiaceae|g__Hungatella|s__Hungatella_hathewayi|t__SGB4739	0	0	0	0	0	0	0	0	0	0	0	0.09346	0	0	0	0	0	0
k__Bacteria|p__Firmicutes|c__Clostridia|o__Clostridiales|f__Ruminococcaceae|g__GGB9627	0	0	0.02302	0	0	0	0	0	0	0	0	0.00725	0	0	0	0	0	0
k__Bacteria|p__Firmicutes|c__Clostridia|o__Clostridiales|f__Ruminococcaceae|g__GGB9627|s__GGB9627_SGB15081	0	0	0.02302	0	0	0	0	0	0	0	0	0.00725	0	0	0	0	0	0
k__Bacteria|p__Firmicutes|c__Clostridia|o__Clostridiales|f__Ruminococcaceae|g__GGB9627|s__GGB9627_SGB15081|t__SGB15081	0	0	0.02302	0	0	0	0	0	0	0	0	0.00725	0	0	0	0	0	0
k__Bacteria|p__Firmicutes|c__Clostridia|o__Clostridiales|f__Clostridiaceae|g__Clostridium|s__Clostridium_sp_AF27_2AA	0	0	0.05316	0	0	0.06782	0	0	0	0	0	0	0	0	0	0	0	0
k__Bacteria|p__Firmicutes|c__Clostridia|o__Clostridiales|f__Clostridiaceae|g__Clostridium|s__Clostridium_sp_AF27_2AA|t__SGB4712	0	0	0.05316	0	0	0.06782	0	0	0	0	0	0	0	0	0	0	0	0
k__Bacteria|p__Firmicutes|c__Clostridia|o__Clostridia_unclassified|f__Clostridia_unclassified|g__Clostridia_unclassified|s__Clostridia_unclassified_SGB4317	0	0	0.27855	0	0	0	0	0	0	0	0	0	0	0	0	0	0	0
k__Bacteria|p__Firmicutes|c__Clostridia|o__Clostridiales|f__Lachnospiraceae|g__Coprococcus|s__Coprococcus_catus	0	0	0.20219	0	0	0.40401	0	0	0	0	0	0	0	0	0	0.00106	0.01918	0
k__Bacteria|p__Firmicutes|c__Clostridia|o__Clostridia_unclassified|f__Clostridia_unclassified|g__Clostridia_unclassified|s__Clostridia_unclassified_SGB4317|t__SGB4317	0	0	0.27855	0	0	0	0	0	0	0	0	0	0	0	0	0	0	0
k__Bacteria|p__Firmicutes|c__Clostridia|o__Clostridiales|f__Lachnospiraceae|g__Coprococcus|s__Coprococcus_catus|t__SGB4670	0	0	0.20219	0	0	0.40401	0	0	0	0	0	0	0	0	0	0.00106	0.01918	0
k__Bacteria|p__Firmicutes|c__Clostridia|o__Clostridia_unclassified|f__Clostridia_unclassified|g__Clostridia_unclassified|s__Clostridia_unclassified_SGB4447	0	0	1.02111	0	0.81072	0	0	0	0	0	0	0	0	0	0.12455	0.03487	0	0
k__Bacteria|p__Firmicutes|c__Clostridia|o__Clostridia_unclassified|f__Clostridia_unclassified|g__Clostridia_unclassified|s__Clostridia_bacterium|t__SGB13982	0	0	0.07018	0	0	0	0	0	0	0	0	0	0	0	0	0	0	0
k__Bacteria|p__Firmicutes|c__Clostridia|o__Clostridia_unclassified|f__Clostridia_unclassified|g__Clostridia_unclassified|s__Clostridia_unclassified_SGB4447|t__SGB4447	0	0	1.02111	0	0.81072	0	0	0	0	0	0	0	0	0	0.12455	0.03487	0	0
k__Bacteria|p__Firmicutes|c__Tissierellia	0	0	0	0	0	0	0	0	0	0	0	0	0	0	0	0	0.00135	0
k__Bacteria|p__Firmicutes|c__Tissierellia|o__Tissierellales	0	0	0	0	0	0	0	0	0	0	0	0	0	0	0	0	0.00135	0
k__Bacteria|p__Firmicutes|c__Tissierellia|o__Tissierellales|f__Peptoniphilaceae	0	0	0	0	0	0	0	0	0	0	0	0	0	0	0	0	0.00135	0
k__Bacteria|p__Proteobacteria|c__Betaproteobacteria|o__Burkholderiales|f__Sutterellaceae|g__Parasutterella	0	0	0	0	0	0.04584	0	0	0	0	0	0	0	0.03473	0	0	0.1281	0.269052
k__Bacteria|p__Firmicutes|c__Tissierellia|o__Tissierellales|f__Peptoniphilaceae|g__Peptoniphilus	0	0	0	0	0	0	0	0	0	0	0	0	0	0	0	0	0.00135	0
k__Bacteria|p__Proteobacteria|c__Betaproteobacteria|o__Burkholderiales|f__Sutterellaceae|g__Parasutterella|s__Parasutterella_excrementihominis	0	0	0	0	0	0.04584	0	0	0	0	0	0	0	0	0	0	0.1281	0.269052
k__Bacteria|p__Firmicutes|c__Clostridia|o__Clostridiales|f__Eubacteriaceae|g__Intestinibacillus|s__Intestinibacillus_sp_Marseille_P6563	0	0	0	0	0	0	0	0	0	0	0	0	0	0	0	0	0.00135	0
k__Bacteria|p__Proteobacteria|c__Betaproteobacteria|o__Burkholderiales|f__Sutterellaceae|g__Parasutterella|s__Parasutterella_excrementihominis|t__SGB9262	0	0	0	0	0	0.04584	0	0	0	0	0	0	0	0	0	0	0.1281	0.269052
k__Bacteria|p__Firmicutes|c__Clostridia|o__Clostridiales|f__Eubacteriaceae|g__Intestinibacillus|s__Intestinibacillus_sp_Marseille_P6563|t__SGB29313	0	0	0	0	0	0	0	0	0	0	0	0	0	0	0	0	0.00135	0
k__Bacteria|p__Firmicutes|c__Negativicutes|o__Acidaminococcales|f__Acidaminococcaceae|g__Acidaminococcus	0	0	0.02987	0	0	0	0	0	0	0	0	0	0	0	0	0	0	0
k__Bacteria|p__Firmicutes|c__Clostridia|o__Clostridiales|f__Ruminococcaceae|g__Ruminococcaceae_unclassified|s__Ruminococcaceae_unclassified_SGB4425	0	0	1.90103	0	0	0	0	0	0	0	0	0	0	0	0	0	0	0
k__Bacteria|p__Firmicutes|c__Clostridia|o__Clostridiales|f__Clostridiaceae|g__Clostridium|s__Clostridium_sp_AM49_4BH	0	0	0.37502	0.32671	0	0.38298	0	0	0	0	0	0	0	0	0	0	0	0
k__Bacteria|p__Firmicutes|c__Negativicutes|o__Veillonellales|f__Veillonellaceae|g__Dialister|s__Dialister_invisus	0	0	0.33007	0.00892	0	0	0	0	0	0	0	0	0.20104	0.04022	0	0	0	0
k__Bacteria|p__Firmicutes|c__Clostridia|o__Clostridiales|f__Lachnospiraceae|g__Lachnospira|s__Lachnospira_sp_NSJ_43	0	0	0.05429	0	0	0	0	0	0	0	0	0	0	0	0	0	0	0
k__Bacteria|p__Firmicutes|c__Clostridia|o__Clostridiales|f__Ruminococcaceae|g__Ruminococcaceae_unclassified|s__Ruminococcaceae_unclassified_SGB15265	0	0	0.03119	0	0	0	0	0	0	0	0	0	0	0	0	0	0	0
k__Bacteria|p__Firmicutes|c__Negativicutes|o__Acidaminococcales|f__Acidaminococcaceae|g__Acidaminococcus|s__Acidaminococcus_intestini	0	0	0.02987	0	0	0	0	0	0	0	0	0	0	0	0	0	0	0
k__Bacteria|p__Firmicutes|c__Clostridia|o__Clostridiales|f__Eubacteriaceae|g__Eubacterium|s__Eubacterium_ventriosum	0	0	0.01998	0	0	0	0	0	0	0	0	0	0	0	0	0	0	0
k__Bacteria|p__Firmicutes|c__Clostridia|o__Clostridiales|f__Clostridiaceae|g__Clostridium|s__Clostridium_sp_AF34_13	0	0	0.01862	0	0	0.81232	0	0	0	0	0	0	0	0	0	0	0	0
k__Bacteria|p__Firmicutes|c__Clostridia|o__Clostridiales|f__Ruminococcaceae|g__Ruminococcaceae_unclassified|s__Ruminococcaceae_unclassified_SGB4425|t__SGB4425_group	0	0	1.90103	0	0	0	0	0	0	0	0	0	0	0	0	0	0	0
k__Bacteria|p__Firmicutes|c__Clostridia|o__Clostridiales|f__Clostridiaceae|g__Clostridium|s__Clostridium_sp_AM49_4BH|t__SGB4652	0	0	0.37502	0.32671	0	0.38298	0	0	0	0	0	0	0	0	0	0	0	0
k__Bacteria|p__Firmicutes|c__Negativicutes|o__Veillonellales|f__Veillonellaceae|g__Dialister|s__Dialister_invisus|t__SGB5825_group	0	0	0.33007	0.00892	0	0	0	0	0	0	0	0	0.20104	0.04022	0	0	0	0
k__Bacteria|p__Firmicutes|c__Clostridia|o__Clostridia_unclassified|f__Clostridia_unclassified|g__Clostridia_unclassified|s__Clostridia_bacterium|t__SGB4335	0	0	0.27022	0	0	0	0	0	0	0	0	0	0	0	0	0	0	0
k__Bacteria|p__Firmicutes|c__Clostridia|o__Clostridiales|f__Lachnospiraceae|g__Lachnospira|s__Lachnospira_sp_NSJ_43|t__SGB5087	0	0	0.05429	0	0	0	0	0	0	0	0	0	0	0	0	0	0	0
k__Bacteria|p__Firmicutes|c__Clostridia|o__Clostridiales|f__Ruminococcaceae|g__Ruminococcaceae_unclassified|s__Ruminococcaceae_unclassified_SGB15265|t__SGB15265_group	0	0	0.03119	0	0	0	0	0	0	0	0	0	0	0	0	0	0	0
k__Bacteria|p__Firmicutes|c__Negativicutes|o__Acidaminococcales|f__Acidaminococcaceae|g__Acidaminococcus|s__Acidaminococcus_intestini|t__SGB5736	0	0	0.02987	0	0	0	0	0	0	0	0	0	0	0	0	0	0	0
k__Bacteria|p__Firmicutes|c__Clostridia|o__Clostridiales|f__Eubacteriaceae|g__Eubacterium|s__Eubacterium_ventriosum|t__SGB5045	0	0	0.01998	0	0	0	0	0	0	0	0	0	0	0	0	0	0	0
k__Bacteria|p__Firmicutes|c__Clostridia|o__Clostridiales|f__Clostridiaceae|g__Clostridium|s__Clostridium_sp_AF34_13|t__SGB4659	0	0	0.01862	0	0	0.81232	0	0	0	0	0	0	0	0	0	0	0	0
k__Bacteria|p__Firmicutes|c__Clostridia|o__Clostridia_unclassified|f__Clostridia_unclassified|g__Clostridia_unclassified|s__Clostridia_bacterium|t__SGB6328	0	0	0.0148	0	0	0	0	0	0	0	0	0	0	0	0	0	0	0
k__Bacteria|p__Firmicutes|c__Clostridia|o__Clostridia_unclassified|f__Clostridia_unclassified|g__Clostridia_unclassified|s__Clostridia_bacterium|t__SGB14182	0	0	0.00451	0	0	0	0	0	0	0	0	0	0	0	0	0	0	0
k__Bacteria|p__Bacteroidetes|c__Flavobacteriia	0	0	0	0.01002	0	0	0	0	0	0	0	0	0.0283	0	0	0	0	0
k__Bacteria|p__Proteobacteria|c__Alphaproteobacteria|o__Rhizobiales	0	0	0	0.08247	0	0	0	0	0	0	0	0	0.0991	0	0	0	0	0
k__Bacteria|p__Bacteroidetes|c__Flavobacteriia|o__Flavobacteriales	0	0	0	0.01002	0	0	0	0	0	0	0	0	0.0283	0	0	0	0	0
k__Bacteria|p__Proteobacteria|c__Alphaproteobacteria|o__Rhizobiales|f__Phyllobacteriaceae	0	0	0	0.08247	0	0	0	0	0	0	0	0	0.0991	0	0	0	0	0
k__Bacteria|p__Bacteroidetes|c__Flavobacteriia|o__Flavobacteriales|f__Flavobacteriales_unclassified	0	0	0	0.01002	0	0	0	0	0	0	0	0	0.0283	0	0	0	0	0
k__Bacteria|p__Firmicutes|c__Clostridia|o__Clostridiales|f__Ruminococcaceae|g__GGB9623	0	0	0	0.95705	0	0	0	0	0	0	0	0	0.7323	0	0	0	0	0
k__Bacteria|p__Bacteroidetes|c__Bacteroidia|o__Bacteroidales|f__Rikenellaceae|g__GGB1689	0	0	0	0.66703	0	0	0	0	0	0	0	0	0.12864	0	0	0	0	0
k__Bacteria|p__Firmicutes|c__Clostridia|o__Clostridiales|f__Ruminococcaceae|g__GGB9694	0	0	0	0	0	0	0	0	0	0	0	0	0.12859	0	0	0	0	0
k__Bacteria|p__Proteobacteria|c__Alphaproteobacteria|o__Rhizobiales|f__Phyllobacteriaceae|g__GGB38171	0	0	0	0.08247	0	0	0	0	0	0	0	0	0.0991	0	0	0	0	0
k__Bacteria|p__Bacteroidetes|c__Flavobacteriia|o__Flavobacteriales|f__Flavobacteriales_unclassified|g__GGB1662	0	0	0	0.01002	0	0	0	0	0	0	0	0	0.0283	0	0	0	0	0
k__Bacteria|p__Verrucomicrobia|c__Verrucomicrobiae|o__Verrucomicrobiales|f__Akkermansiaceae|g__Akkermansia|s__Akkermansia_muciniphila	0	0	0	2.20064	0.1382	0	0	0	0	0	0	0	1.86008	1.04244	0.14057	0.31738	0.0511	0
k__Bacteria|p__Firmicutes|c__Clostridia|o__Clostridiales|f__Lachnospiraceae|g__Anaerotignum|s__Anaerotignum_lactatifermentans	0	0	0	0	0	0	0	0	0	0	0	0	0.91648	0	0	0	0	0
k__Bacteria|p__Firmicutes|c__Clostridia|o__Clostridiales|f__Ruminococcaceae|g__GGB9623|s__GGB9623_SGB15076	0	0	0	0.95705	0	0	0	0	0	0	0	0	0.7323	0	0	0	0	0
k__Bacteria|p__Bacteroidetes|c__Bacteroidia|o__Bacteroidales|f__Rikenellaceae|g__GGB1689|s__GGB1689_SGB2321	0	0	0	0.66703	0	0	0	0	0	0	0	0	0.12864	0	0	0	0	0
k__Bacteria|p__Firmicutes|c__Clostridia|o__Clostridiales|f__Ruminococcaceae|g__GGB9694|s__GGB9694_SGB15203	0	0	0	0	0	0	0	0	0	0	0	0	0.12859	0	0	0	0	0
k__Bacteria|p__Firmicutes|c__Clostridia|o__Clostridiales|f__Lachnospiraceae|g__Anaerostipes|s__Anaerostipes_caccae	0	0	0	0	0	0	0	0	0	0	0	0	0.1143	0	0	0	0	0
k__Bacteria|p__Proteobacteria|c__Alphaproteobacteria|o__Rhizobiales|f__Phyllobacteriaceae|g__GGB38171|s__GGB38171_SGB72433	0	0	0	0.08247	0	0	0	0	0	0	0	0	0.0991	0	0	0	0	0
k__Bacteria|p__Bacteroidetes|c__Bacteroidia|o__Bacteroidales|f__Rikenellaceae|g__Alistipes|s__Alistipes_inops	0	0	0	0.12425	0	0	0	0	0	0	0	0	0.03039	0	0	0	0	0
k__Bacteria|p__Bacteroidetes|c__Flavobacteriia|o__Flavobacteriales|f__Flavobacteriales_unclassified|g__GGB1662|s__GGB1662_SGB2276	0	0	0	0.01002	0	0	0	0	0	0	0	0	0.0283	0	0	0	0	0
k__Bacteria|p__Firmicutes|c__Clostridia|o__Clostridiales|f__Clostridiaceae|g__Clostridium|s__Clostridium_sp_SN20	0	0	0	0	0	0	0	0	0	0	0	0	0.01588	0	0.29875	0	0	0
k__Bacteria|p__Bacteroidetes|c__Bacteroidia|o__Bacteroidales|f__Odoribacteraceae|g__Butyricimonas|s__Butyricimonas_virosa	0	0	0	0	0	0	0	0	0	0	0	0	0.01361	0	0	0	0	0
k__Bacteria|p__Verrucomicrobia|c__Verrucomicrobiae|o__Verrucomicrobiales|f__Akkermansiaceae|g__Akkermansia|s__Akkermansia_muciniphila|t__SGB9226	0	0	0	2.20064	0.1382	0	0	0	0	0	0	0	1.86008	1.04244	0.14057	0.31738	0.0511	0
k__Bacteria|p__Firmicutes|c__Clostridia|o__Clostridiales|f__Lachnospiraceae|g__Anaerotignum|s__Anaerotignum_lactatifermentans|t__SGB5193	0	0	0	0	0	0	0	0	0	0	0	0	0.91648	0	0	0	0	0
k__Bacteria|p__Firmicutes|c__Clostridia|o__Clostridiales|f__Ruminococcaceae|g__GGB9623|s__GGB9623_SGB15076|t__SGB15076	0	0	0	0.95705	0	0	0	0	0	0	0	0	0.7323	0	0	0	0	0
k__Bacteria|p__Firmicutes|c__Clostridia|o__Clostridiales|f__Lachnospiraceae|g__Dorea|s__Dorea_longicatena|t__SGB4582_group	0	0	0	0.0547	0.87079	0.17016	0	0	0	0	0	0	0.496	0	0.74435	0.00092	0.82663	0
k__Bacteria|p__Firmicutes|c__Clostridia|o__Clostridia_unclassified|f__Clostridia_unclassified|g__Clostridia_unclassified|s__Clostridia_bacterium|t__SGB15390	0	0	0	0.28755	0	0	0	0	0	0	0	0	0.34047	0.05533	0	0	0	0
k__Bacteria|p__Firmicutes|c__Clostridia|o__Clostridiales|f__Lachnospiraceae|g__Coprococcus|s__Coprococcus_eutactus|t__SGB5121	0	0	0	2.96196	0	0	0	0	0	0	0	0	0.12881	0	0	0	0	0
k__Bacteria|p__Bacteroidetes|c__Bacteroidia|o__Bacteroidales|f__Rikenellaceae|g__GGB1689|s__GGB1689_SGB2321|t__SGB2321	0	0	0	0.66703	0	0	0	0	0	0	0	0	0.12864	0	0	0	0	0
k__Bacteria|p__Firmicutes|c__Clostridia|o__Clostridiales|f__Ruminococcaceae|g__GGB9694|s__GGB9694_SGB15203|t__SGB15203	0	0	0	0	0	0	0	0	0	0	0	0	0.12859	0	0	0	0	0
k__Bacteria|p__Firmicutes|c__Clostridia|o__Clostridiales|f__Lachnospiraceae|g__Anaerostipes|s__Anaerostipes_caccae|t__SGB4529	0	0	0	0	0	0	0	0	0	0	0	0	0.1143	0	0	0	0	0
k__Bacteria|p__Proteobacteria|c__Alphaproteobacteria|o__Rhizobiales|f__Phyllobacteriaceae|g__GGB38171|s__GGB38171_SGB72433|t__SGB72433_group	0	0	0	0.08247	0	0	0	0	0	0	0	0	0.0991	0	0	0	0	0
k__Bacteria|p__Bacteroidetes|c__Bacteroidia|o__Bacteroidales|f__Rikenellaceae|g__Alistipes|s__Alistipes_inops|t__SGB2286	0	0	0	0.12425	0	0	0	0	0	0	0	0	0.03039	0	0	0	0	0
k__Bacteria|p__Bacteroidetes|c__Flavobacteriia|o__Flavobacteriales|f__Flavobacteriales_unclassified|g__GGB1662|s__GGB1662_SGB2276|t__SGB2276	0	0	0	0.01002	0	0	0	0	0	0	0	0	0.0283	0	0	0	0	0
k__Bacteria|p__Firmicutes|c__Clostridia|o__Clostridiales|f__Clostridiaceae|g__Clostridium|s__Clostridium_sp_SN20|t__SGB29328	0	0	0	0	0	0	0	0	0	0	0	0	0.01588	0	0.29875	0	0	0
k__Bacteria|p__Bacteroidetes|c__Bacteroidia|o__Bacteroidales|f__Odoribacteraceae|g__Butyricimonas|s__Butyricimonas_virosa|t__SGB1784	0	0	0	0	0	0	0	0	0	0	0	0	0.01361	0	0	0	0	0
k__Bacteria|p__Firmicutes|c__Clostridia|o__Clostridia_unclassified|f__Clostridia_unclassified|g__Clostridia_unclassified|s__Clostridia_unclassified_SGB4367	0	0	0	0.60635	0	0	0	0	0	0	0	0	0	0	0	0	0	0
k__Bacteria|p__Firmicutes|c__Clostridia|o__Clostridia_unclassified|f__Clostridia_unclassified|g__Clostridia_unclassified|s__Clostridia_unclassified_SGB4367|t__SGB4367	0	0	0	0.60635	0	0	0	0	0	0	0	0	0	0	0	0	0	0
k__Bacteria|p__Firmicutes|c__Clostridia|o__Clostridia_unclassified|f__Clostridia_unclassified|g__Clostridia_unclassified|s__Clostridia_bacterium|t__SGB14937	0	0	0	0.06874	0	0	0	0	0	0	0	0	0	0.01606	0	0	0	0
k__Bacteria|p__Firmicutes|c__Negativicutes|o__Selenomonadales	0	0	0	0.03883	0	0	0	0	0	0	0	0	0	0	0	0	0	0
k__Bacteria|p__Firmicutes|c__Negativicutes|o__Selenomonadales|f__Selenomonadaceae	0	0	0	0.03883	0	0	0	0	0	0	0	0	0	0	0	0	0	0
k__Bacteria|p__Firmicutes|c__Negativicutes|o__Selenomonadales|f__Selenomonadaceae|g__Megamonas	0	0	0	0.03883	0	0	0	0	0	0	0	0	0	0	0	0	0	0
k__Bacteria|p__Firmicutes|c__Negativicutes|o__Selenomonadales|f__Selenomonadaceae|g__Megamonas|s__Megamonas_funiformis	0	0	0	0.03883	0	0	0	0	0	0	0	0	0	0	0	0	0	0
k__Bacteria|p__Firmicutes|c__Negativicutes|o__Selenomonadales|f__Selenomonadaceae|g__Megamonas|s__Megamonas_funiformis|t__SGB6962_group	0	0	0	0.03883	0	0	0	0	0	0	0	0	0	0	0	0	0	0
k__Bacteria|p__Firmicutes|c__Negativicutes|o__Veillonellales|f__Veillonellaceae|g__Megasphaera	0	0	0	0	0	0	0	0	0	0	0	0	0	0.39287	0	0	0	0
k__Bacteria|p__Firmicutes|c__Negativicutes|o__Veillonellales|f__Veillonellaceae|g__Megasphaera|s__Megasphaera_massiliensis	0	0	0	0	0	0	0	0	0	0	0	0	0	0.39287	0	0	0	0
k__Bacteria|p__Proteobacteria|c__Betaproteobacteria|o__Burkholderiales|f__Sutterellaceae|g__Parasutterella|s__Parasutterella_SGB9260	0	0	0	0	0	0	0	0	0	0	0	0	0	0.03473	0	0	0	0
k__Bacteria|p__Firmicutes|c__Negativicutes|o__Veillonellales|f__Veillonellaceae|g__Megasphaera|s__Megasphaera_massiliensis|t__SGB5857_group	0	0	0	0	0	0	0	0	0	0	0	0	0	0.39287	0	0	0	0
k__Bacteria|p__Proteobacteria|c__Betaproteobacteria|o__Burkholderiales|f__Sutterellaceae|g__Parasutterella|s__Parasutterella_SGB9260|t__SGB9260	0	0	0	0	0	0	0	0	0	0	0	0	0	0.03473	0	0	0	0
k__Bacteria|p__Firmicutes|c__Clostridia|o__Clostridiales|f__Lachnospiraceae|g__GGB3677	0	0	0	0.08583	0	0	0	0	0	0	0	0	0	0	0	0	0	0
k__Bacteria|p__Firmicutes|c__Clostridia|o__Clostridiales|f__Lachnospiraceae|g__GGB3677|s__GGB3677_SGB4990	0	0	0	0.08583	0	0	0	0	0	0	0	0	0	0	0	0	0	0
k__Bacteria|p__Firmicutes|c__Clostridia|o__Clostridiales|f__Lachnospiraceae|g__Blautia|s__Blautia_hydrogenotrophica	0	0	0	0.04565	0	0	0	0	0	0	0	0	0	0	0	0	0	0
k__Bacteria|p__Firmicutes|c__Clostridia|o__Clostridiales|f__Lachnospiraceae|g__Lachnospira|s__Lachnospira_pectinoschiza	0	0	0	0.29343	0	0	0	0	0	0	0	0	0	0	0	0	0	0
k__Bacteria|p__Firmicutes|c__Clostridia|o__Clostridiales|f__Lachnospiraceae|g__Lachnospiraceae_unclassified|s__Lachnospiraceae_bacterium|t__SGB4832	0	0	0	0.09651	0	0.05781	0	0	0	0	0	0	0	0	0	0	0	0
k__Bacteria|p__Firmicutes|c__Clostridia|o__Clostridiales|f__Lachnospiraceae|g__GGB3677|s__GGB3677_SGB4990|t__SGB4990	0	0	0	0.08583	0	0	0	0	0	0	0	0	0	0	0	0	0	0
k__Bacteria|p__Firmicutes|c__Clostridia|o__Clostridia_unclassified|f__Clostridia_unclassified|g__Clostridia_unclassified|s__Clostridia_bacterium|t__SGB15370	0	0	0	0.02629	0	0	0	0	0	0	0	0	0	0	0	0	0	0
k__Bacteria|p__Firmicutes|c__Clostridia|o__Clostridiales|f__Lachnospiraceae|g__Blautia|s__Blautia_hydrogenotrophica|t__SGB4677	0	0	0	0.04565	0	0	0	0	0	0	0	0	0	0	0	0	0	0
k__Bacteria|p__Firmicutes|c__Clostridia|o__Clostridiales|f__Lachnospiraceae|g__Lachnospira|s__Lachnospira_pectinoschiza|t__SGB5075_group	0	0	0	0.29343	0	0	0	0	0	0	0	0	0	0	0	0	0	0
k__Bacteria|p__Actinobacteria|c__Coriobacteriia|o__Coriobacteriales|f__Atopobiaceae	0	0	0	0.24693	0	0.04968	0	0	0	0	0	0	0	0	0	0.01193	0	0
k__Bacteria|p__Actinobacteria|c__Coriobacteriia|o__Coriobacteriales|f__Atopobiaceae|g__Olsenella	0	0	0	0.24693	0	0.04968	0	0	0	0	0	0	0	0	0	0.01193	0	0
k__Bacteria|p__Firmicutes|c__Clostridia|o__Clostridiales|f__Ruminococcaceae|g__GGB9707	0	0	0	0.20494	0	0	0	0	0	0	0	0	0	0	0	0	0	0
k__Bacteria|p__Proteobacteria|c__Deltaproteobacteria|o__Desulfovibrionales|f__Desulfovibrionaceae|g__GGB28319	0	0	0	0.07198	0	0	0	0	0	0	0	0	0	0	0	0	0	0
k__Bacteria|p__Firmicutes|c__Clostridia|o__Clostridia_unclassified|f__Clostridia_unclassified|g__Candidatus_Pseudobutyricicoccus	0	0	0	0.0141	0	0	0	0	0	0	0	0	0	0	0	0	0	0
k__Bacteria|p__Actinobacteria|c__Coriobacteriia|o__Coriobacteriales|f__Atopobiaceae|g__Olsenella|s__Olsenella_sp_GAM18	0	0	0	0.24693	0	0.04968	0	0	0	0	0	0	0	0	0	0.01193	0	0
k__Bacteria|p__Firmicutes|c__Clostridia|o__Clostridiales|f__Ruminococcaceae|g__GGB9707|s__GGB9707_SGB15229	0	0	0	0.20494	0	0	0	0	0	0	0	0	0	0	0	0	0	0
k__Bacteria|p__Proteobacteria|c__Deltaproteobacteria|o__Desulfovibrionales|f__Desulfovibrionaceae|g__GGB28319|s__GGB28319_SGB40892	0	0	0	0.07198	0	0	0	0	0	0	0	0	0	0	0	0	0	0
k__Bacteria|p__Firmicutes|c__Clostridia|o__Clostridia_unclassified|f__Clostridia_unclassified|g__Candidatus_Pseudobutyricicoccus|s__Candidatus_Pseudobutyricicoccus_lothianensis	0	0	0	0.0141	0	0	0	0	0	0	0	0	0	0	0	0	0	0
k__Bacteria|p__Actinobacteria|c__Coriobacteriia|o__Coriobacteriales|f__Atopobiaceae|g__Olsenella|s__Olsenella_sp_GAM18|t__SGB14370_group	0	0	0	0.24693	0	0.04968	0	0	0	0	0	0	0	0	0	0.01193	0	0
k__Bacteria|p__Firmicutes|c__Clostridia|o__Clostridiales|f__Lachnospiraceae|g__Lachnospiraceae_unclassified|s__Lachnospiraceae_bacterium|t__SGB4648	0	0	0	0.23941	0	0	0	0	0	0	0	0	0	0	0	0	0	0
k__Bacteria|p__Firmicutes|c__Clostridia|o__Clostridiales|f__Ruminococcaceae|g__GGB9707|s__GGB9707_SGB15229|t__SGB15229	0	0	0	0.20494	0	0	0	0	0	0	0	0	0	0	0	0	0	0
k__Bacteria|p__Firmicutes|c__Clostridia|o__Clostridiales|f__Lachnospiraceae|g__Lachnospiraceae_unclassified|s__Lachnospiraceae_bacterium|t__SGB5060	0	0	0	0.08372	0	0	0	0	0	0	0	0	0	0	0	0	0	0
k__Bacteria|p__Proteobacteria|c__Deltaproteobacteria|o__Desulfovibrionales|f__Desulfovibrionaceae|g__GGB28319|s__GGB28319_SGB40892|t__SGB40892	0	0	0	0.07198	0	0	0	0	0	0	0	0	0	0	0	0	0	0
k__Bacteria|p__Firmicutes|c__Clostridia|o__Clostridia_unclassified|f__Clostridia_unclassified|g__Candidatus_Pseudobutyricicoccus|s__Candidatus_Pseudobutyricicoccus_lothianensis|t__SGB14975	0	0	0	0.0141	0	0	0	0	0	0	0	0	0	0	0	0	0	0
k__Bacteria|p__Firmicutes|c__Clostridia|o__Clostridiales|f__Lachnospiraceae|g__Lachnospiraceae_unclassified|s__Lachnospiraceae_bacterium|t__SGB4671	0	0	0	0.00597	0	0	0	0	0	0	0	0	0	0	0	0	0	0
k__Bacteria|p__Firmicutes|c__Clostridia|o__Clostridiales|f__Ruminococcaceae|g__Pseudoflavonifractor|s__Pseudoflavonifractor_capillosus	0	0	0	0	0	0	0	0	0	0	0	0	0	0	0	0.00273	0	0
k__Bacteria|p__Firmicutes|c__Clostridia|o__Clostridiales|f__Ruminococcaceae|g__Pseudoflavonifractor|s__Pseudoflavonifractor_capillosus|t__SGB15140	0	0	0	0	0	0	0	0	0	0	0	0	0	0	0	0.00273	0	0
k__Bacteria|p__Planctomycetes	0	0	0	0	0.49922	0	0	0	0	0	0	0	0	0	0.50832	0.01366	0	0
k__Bacteria|p__Planctomycetes|c__Planctomycetia	0	0	0	0	0.49922	0	0	0	0	0	0	0	0	0	0.50832	0.01366	0	0
k__Bacteria|p__Planctomycetes|c__Planctomycetia|o__Pirellulales	0	0	0	0	0.49922	0	0	0	0	0	0	0	0	0	0.50832	0.01366	0	0
k__Bacteria|p__Planctomycetes|c__Planctomycetia|o__Pirellulales|f__Pirellulaceae	0	0	0	0	0.49922	0	0	0	0	0	0	0	0	0	0.50832	0.01366	0	0
k__Bacteria|p__Planctomycetes|c__Planctomycetia|o__Pirellulales|f__Pirellulaceae|g__GGB6566	0	0	0	0	0.49922	0	0	0	0	0	0	0	0	0	0.50832	0.01366	0	0
k__Bacteria|p__Bacteroidetes|c__Bacteroidia|o__Bacteroidales|f__Bacteroidaceae|g__GGB1387	0	0	0	0	1.28286	0	0	0	0	0	0	0	0	0	0.30155	0	0	0
k__Bacteria|p__Planctomycetes|c__Planctomycetia|o__Pirellulales|f__Pirellulaceae|g__GGB6566|s__GGB6566_SGB9275	0	0	0	0	0.49922	0	0	0	0	0	0	0	0	0	0.50832	0.01366	0	0
k__Bacteria|p__Firmicutes|c__Clostridia|o__Clostridiales|f__Lachnospiraceae|g__Blautia|s__Blautia_hominis	0	0	0	0	0	0	0	0	0	0	0	0	0	0	0.50684	0	0	0
k__Bacteria|p__Bacteroidetes|c__Bacteroidia|o__Bacteroidales|f__Bacteroidaceae|g__GGB1387|s__GGB1387_SGB1895	0	0	0	0	1.28286	0	0	0	0	0	0	0	0	0	0.30155	0	0	0
k__Bacteria|p__Bacteroidetes|c__Bacteroidia|o__Bacteroidales|f__Bacteroidales_unclassified|g__Phocaeicola|s__Phocaeicola_coprophilus	0	0	0	0	1.12468	0	0	0	0	0	0	0	0	0	0.22357	0.00251	0	0
k__Bacteria|p__Bacteroidetes|c__Bacteroidia|o__Bacteroidales|f__Bacteroidales_unclassified|g__Phocaeicola|s__Phocaeicola_coprocola	0	0	0	0	0.96845	0	0	0	0	0	0	0	0	0	0.12522	0	0	0
k__Bacteria|p__Firmicutes|c__Clostridia|o__Clostridiales|f__Eubacteriaceae|g__Eubacterium|s__Eubacterium_sp_AM28_29	0	0	0	0	0.51462	0	0	0	0	0	0	0	0	0	0.01738	0.03367	0	0
k__Bacteria|p__Planctomycetes|c__Planctomycetia|o__Pirellulales|f__Pirellulaceae|g__GGB6566|s__GGB6566_SGB9275|t__SGB9275	0	0	0	0	0.49922	0	0	0	0	0	0	0	0	0	0.50832	0.01366	0	0
k__Bacteria|p__Firmicutes|c__Clostridia|o__Clostridiales|f__Lachnospiraceae|g__Blautia|s__Blautia_hominis|t__SGB29381	0	0	0	0	0	0	0	0	0	0	0	0	0	0	0.50684	0	0	0
k__Bacteria|p__Bacteroidetes|c__Bacteroidia|o__Bacteroidales|f__Bacteroidaceae|g__GGB1387|s__GGB1387_SGB1895|t__SGB1895	0	0	0	0	1.28286	0	0	0	0	0	0	0	0	0	0.30155	0	0	0
k__Bacteria|p__Firmicutes|c__Clostridia|o__Clostridia_unclassified|f__Clostridia_unclassified|g__Clostridia_unclassified|s__Clostridia_bacterium|t__SGB14857	0	0	0	0	0	0	0	0	0	0	0	0	0	0	0.27498	0	0	0
k__Bacteria|p__Bacteroidetes|c__Bacteroidia|o__Bacteroidales|f__Bacteroidales_unclassified|g__Phocaeicola|s__Phocaeicola_coprophilus|t__SGB1888	0	0	0	0	1.12468	0	0	0	0	0	0	0	0	0	0.22357	0.00251	0	0
k__Bacteria|p__Firmicutes|c__Clostridia|o__Clostridiales|f__Eubacteriaceae|g__Eubacteriaceae_unclassified|s__Eubacteriaceae_bacterium|t__SGB3972	0	0	0	0	0	0	0	0	0	0	0	0	0	0	0.14963	0	0	0
k__Bacteria|p__Bacteroidetes|c__Bacteroidia|o__Bacteroidales|f__Bacteroidales_unclassified|g__Phocaeicola|s__Phocaeicola_coprocola|t__SGB1891_group	0	0	0	0	0.96845	0	0	0	0	0	0	0	0	0	0.12522	0	0	0
k__Bacteria|p__Firmicutes|c__Clostridia|o__Clostridiales|f__Eubacteriaceae|g__Eubacterium|s__Eubacterium_sp_AM28_29|t__SGB6796_group	0	0	0	0	0.51462	0	0	0	0	0	0	0	0	0	0.01738	0.03367	0	0
k__Bacteria|p__Bacteroidetes|c__Bacteroidia|o__Bacteroidales|f__Bacteroidales_unclassified|g__Phocaeicola|s__Phocaeicola_plebeius	0	0	0	0	6.05898	0.00926	0	0	0	0	0	0	0	0	0	0	0.16193	0
k__Bacteria|p__Bacteroidetes|c__Bacteroidia|o__Bacteroidales|f__Bacteroidales_unclassified|g__Phocaeicola|s__Phocaeicola_plebeius|t__SGB1903_group	0	0	0	0	6.05898	0.00926	0	0	0	0	0	0	0	0	0	0	0.16193	0
k__Bacteria|p__Firmicutes|c__Clostridia|o__Clostridiales|f__Ruminococcaceae|g__GGB9667	0	0	0	0	0.05723	0	0	0	0	0	0	0	0	0	0	0.04281	0	0
k__Bacteria|p__Firmicutes|c__Clostridia|o__Clostridiales|f__Lachnospiraceae|g__Blautia|s__Blautia_schinkii	0	0	0	0	1.48712	0	0	0	0	0	0	0	0	0	0	0.09149	0	0
k__Bacteria|p__Firmicutes|c__Clostridia|o__Clostridiales|f__Ruminococcaceae|g__GGB9667|s__GGB9667_SGB15164	0	0	0	0	0.05723	0	0	0	0	0	0	0	0	0	0	0.04281	0	0
k__Bacteria|p__Firmicutes|c__Clostridia|o__Clostridiales|f__Lachnospiraceae|g__Blautia|s__Blautia_schinkii|t__SGB4825	0	0	0	0	1.48712	0	0	0	0	0	0	0	0	0	0	0.09149	0	0
k__Bacteria|p__Firmicutes|c__Clostridia|o__Clostridiales|f__Ruminococcaceae|g__GGB9667|s__GGB9667_SGB15164|t__SGB15164	0	0	0	0	0.05723	0	0	0	0	0	0	0	0	0	0	0.04281	0	0
k__Bacteria|p__Firmicutes|c__Clostridia|o__Clostridiales|f__Ruminococcaceae|g__Ruminococcus|s__Ruminococcus_sp_AF41_9	0	0	0	0	0.63985	0	0	0	0	0	0	0	0	0	0	0.05291	0	0
k__Bacteria|p__Firmicutes|c__Clostridia|o__Clostridiales|f__Ruminococcaceae|g__Ruminococcus|s__Ruminococcus_sp_AF41_9|t__SGB25497	0	0	0	0	0.63985	0	0	0	0	0	0	0	0	0	0	0.05291	0	0
k__Bacteria|p__Firmicutes|c__Clostridia|o__Clostridiales|f__Lachnospiraceae|g__GGB3570	0	0	0	0	0	0.13809	0	0	0	0	0	0	0	0	0	0	0	0
k__Bacteria|p__Firmicutes|c__Clostridia|o__Clostridiales|f__Lachnospiraceae|g__GGB3570|s__GGB3570_SGB4777	0	0	0	0	0	0.13809	0	0	0	0	0	0	0	0	0	0	0	0
k__Bacteria|p__Firmicutes|c__Clostridia|o__Clostridiales|f__Lachnospiraceae|g__GGB3570|s__GGB3570_SGB4777|t__SGB4777	0	0	0	0	0	0.13809	0	0	0	0	0	0	0	0	0	0	0	0
k__Bacteria|p__Proteobacteria|c__Alphaproteobacteria|o__Alphaproteobacteria_unclassified|f__Alphaproteobacteria_unclassified|g__GGB6613	0	0	0	0	0.00832	0	0	0	0	0	0	0	0	0	0	0	0	0
k__Bacteria|p__Firmicutes|c__Clostridia|o__Clostridiales|f__Eubacteriaceae|g__Eubacterium|s__Eubacterium_sp_AF34_35BH	0	0	0	0	0.01644	0	0	0	0	0	0	0	0	0	0	0	0	0
k__Bacteria|p__Proteobacteria|c__Alphaproteobacteria|o__Alphaproteobacteria_unclassified|f__Alphaproteobacteria_unclassified|g__GGB6613|s__GGB6613_SGB9347	0	0	0	0	0.00832	0	0	0	0	0	0	0	0	0	0	0	0	0
k__Bacteria|p__Firmicutes|c__Clostridia|o__Clostridiales|f__Eubacteriaceae|g__Eubacterium|s__Eubacterium_sp_AF34_35BH|t__SGB5051	0	0	0	0	0.01644	0	0	0	0	0	0	0	0	0	0	0	0	0
k__Bacteria|p__Proteobacteria|c__Alphaproteobacteria|o__Alphaproteobacteria_unclassified|f__Alphaproteobacteria_unclassified|g__GGB6613|s__GGB6613_SGB9347|t__SGB9347	0	0	0	0	0.00832	0	0	0	0	0	0	0	0	0	0	0	0	0
k__Bacteria|p__Bacteroidetes|c__Bacteroidia|o__Bacteroidales|f__Bacteroidaceae|g__Bacteroidaceae_unclassified	0	0	0	0	0	7.49468	0	0	0	0	0	0	0	0	0	0	3.71943	0
k__Bacteria|p__Bacteroidetes|c__Bacteroidia|o__Bacteroidales|f__Bacteroidaceae|g__Bacteroidaceae_unclassified|s__Bacteroidaceae_bacterium	0	0	0	0	0	7.49468	0	0	0	0	0	0	0	0	0	0	3.71943	0
k__Bacteria|p__Proteobacteria|c__Betaproteobacteria|o__Burkholderiales|f__Sutterellaceae|g__Sutterella|s__Sutterella_parvirubra	0	0	0	0	0	0.23018	0	0	0	0	0	0	0	0	0	0	1.95129	0
k__Bacteria|p__Firmicutes|c__Negativicutes|o__Veillonellales|f__Veillonellaceae|g__Veillonella|s__Veillonella_dispar	0	0	0	0	0	0	0	0	0	0	0	0	0	0	0	0	1.11819	2.40713
k__Bacteria|p__Bacteroidetes|c__Bacteroidia|o__Bacteroidales|f__Bacteroidaceae|g__Bacteroidaceae_unclassified|s__Bacteroidaceae_bacterium|t__SGB1910	0	0	0	0	0	7.49468	0	0	0	0	0	0	0	0	0	0	3.71943	0
k__Bacteria|p__Proteobacteria|c__Betaproteobacteria|o__Burkholderiales|f__Sutterellaceae|g__Sutterella|s__Sutterella_parvirubra|t__SGB9292	0	0	0	0	0	0.23018	0	0	0	0	0	0	0	0	0	0	1.95129	0
k__Bacteria|p__Firmicutes|c__Negativicutes|o__Veillonellales|f__Veillonellaceae|g__Veillonella|s__Veillonella_dispar|t__SGB6952	0	0	0	0	0	0	0	0	0	0	0	0	0	0	0	0	1.11819	2.40713
k__Bacteria|p__Firmicutes|c__Clostridia|o__Clostridiales|f__Peptococcaceae	0	0	0	0	0	0.16737	0	0	0	0	0	0	0	0	0	0	0.0232	0
k__Bacteria|p__Bacteroidetes|c__Bacteroidia|o__Bacteroidales|f__Bacteroidaceae|g__GGB1379	0	0	0	0	0	0.72375	0	0	0	0	0	0	0	0	0	0	0.22042	0
k__Bacteria|p__Firmicutes|c__Clostridia|o__Clostridiales|f__Peptococcaceae|g__Peptococcaceae_unclassified	0	0	0	0	0	0.16737	0	0	0	0	0	0	0	0	0	0	0.0232	0
k__Bacteria|p__Firmicutes|c__Clostridia|o__Clostridiales|f__Ruminococcaceae|g__GGB58485	0	0	0	0	0	0	0	0	0	0	0	0	0	0	0	0	0.00809	0
k__Bacteria|p__Bacteroidetes|c__Bacteroidia|o__Bacteroidales|f__Tannerellaceae|g__Parabacteroides|s__Parabacteroides_acidifaciens	0	0	0	0	0	0	0	0	0	0	0	0	0	0	0	0	0.42585	0
k__Bacteria|p__Bacteroidetes|c__Bacteroidia|o__Bacteroidales|f__Bacteroidaceae|g__GGB1379|s__GGB1379_SGB1880	0	0	0	0	0	0.72375	0	0	0	0	0	0	0	0	0	0	0.22042	0
k__Bacteria|p__Firmicutes|c__CFGB3053|o__OFGB3053|f__FGB3053|g__GGB9581|s__GGB9581_SGB79823	0	0	0	0	0	0	0	0	0	0	0	0	0	0	0	0	0.17844	0
k__Bacteria|p__Proteobacteria|c__Deltaproteobacteria|o__Desulfovibrionales|f__Desulfovibrionaceae|g__Desulfovibrio|s__Desulfovibrio_piger	0	0	0	0	0	0	0	0	0	0	0	0	0	0	0	0	0.14239	0.11913
k__Bacteria|p__Proteobacteria|c__Gammaproteobacteria|o__Enterobacterales|f__Hafniaceae|g__Hafnia|s__Hafnia_alvei	0	0	0	0	0	0	0	0	0	0	0	0	0	0	0	0	0.12055	0.489144
k__Bacteria|p__Firmicutes|c__Negativicutes|o__Veillonellales|f__Veillonellaceae|g__Veillonella|s__Veillonella_rogosae	0	0	0	0	0	0	0	0	0	0	0	0	0	0	0	0	0.05988	0
k__Bacteria|p__Firmicutes|c__Clostridia|o__Clostridiales|f__Clostridiales_unclassified|g__Clostridiales_unclassified|s__Clostridiales_unclassified_SGB15150	0	0	0	0	0	0	0	0	0	0	0	0	0	0	0	0	0.04484	0
k__Bacteria|p__Firmicutes|c__Clostridia|o__Clostridiales|f__Peptococcaceae|g__Peptococcaceae_unclassified|s__Peptococcaceae_bacterium	0	0	0	0	0	0.16737	0	0	0	0	0	0	0	0	0	0	0.0232	0
k__Bacteria|p__Firmicutes|c__Clostridia|o__Clostridiales|f__Ruminococcaceae|g__GGB58485|s__GGB58485_SGB80143	0	0	0	0	0	0	0	0	0	0	0	0	0	0	0	0	0.00809	0
k__Bacteria|p__Firmicutes|c__Tissierellia|o__Tissierellales|f__Peptoniphilaceae|g__Peptoniphilus|s__Peptoniphilus_senegalensis	0	0	0	0	0	0	0	0	0	0	0	0	0	0	0	0	0.00135	0
k__Bacteria|p__Bacteroidetes|c__Bacteroidia|o__Bacteroidales|f__Tannerellaceae|g__Parabacteroides|s__Parabacteroides_acidifaciens|t__SGB1943	0	0	0	0	0	0	0	0	0	0	0	0	0	0	0	0	0.42585	0
k__Bacteria|p__Firmicutes|c__Clostridia|o__Clostridia_unclassified|f__Clostridia_unclassified|g__Clostridia_unclassified|s__Clostridia_bacterium|t__SGB14848	0	0	0	0	0	0	0	0	0	0	0	0	0	0	0	0	0.34066	0
k__Bacteria|p__Bacteroidetes|c__Bacteroidia|o__Bacteroidales|f__Bacteroidaceae|g__GGB1379|s__GGB1379_SGB1880|t__SGB1880	0	0	0	0	0	0.72375	0	0	0	0	0	0	0	0	0	0	0.22042	0
k__Bacteria|p__Firmicutes|c__CFGB3053|o__OFGB3053|f__FGB3053|g__GGB9581|s__GGB9581_SGB79823|t__SGB79823	0	0	0	0	0	0	0	0	0	0	0	0	0	0	0	0	0.17844	0
k__Bacteria|p__Proteobacteria|c__Deltaproteobacteria|o__Desulfovibrionales|f__Desulfovibrionaceae|g__Desulfovibrio|s__Desulfovibrio_piger|t__SGB15467_group	0	0	0	0	0	0	0	0	0	0	0	0	0	0	0	0	0.14239	0.11913
k__Bacteria|p__Proteobacteria|c__Gammaproteobacteria|o__Enterobacterales|f__Hafniaceae|g__Hafnia|s__Hafnia_alvei|t__SGB10209_group	0	0	0	0	0	0	0	0	0	0	0	0	0	0	0	0	0.12055	0.489144
k__Bacteria|p__Firmicutes|c__Clostridia|o__Clostridiales|f__Lachnospiraceae|g__Lachnospiraceae_unclassified|s__Lachnospiraceae_bacterium|t__SGB4750	0	0	0	0	0	0.24844	0	0	0	0	0	0	0	0	0	0	0.09901	0
k__Bacteria|p__Firmicutes|c__Negativicutes|o__Veillonellales|f__Veillonellaceae|g__Veillonella|s__Veillonella_rogosae|t__SGB6956	0	0	0	0	0	0	0	0	0	0	0	0	0	0	0	0	0.05988	0
k__Bacteria|p__Firmicutes|c__Clostridia|o__Clostridiales|f__Clostridiales_unclassified|g__Clostridiales_unclassified|s__Clostridiales_unclassified_SGB15150|t__SGB15150	0	0	0	0	0	0	0	0	0	0	0	0	0	0	0	0	0.04484	0
k__Bacteria|p__Firmicutes|c__Clostridia|o__Clostridiales|f__Peptococcaceae|g__Peptococcaceae_unclassified|s__Peptococcaceae_bacterium|t__SGB4053	0	0	0	0	0	0.16737	0	0	0	0	0	0	0	0	0	0	0.0232	0
k__Bacteria|p__Firmicutes|c__Clostridia|o__Clostridiales|f__Ruminococcaceae|g__GGB58485|s__GGB58485_SGB80143|t__SGB80143	0	0	0	0	0	0	0	0	0	0	0	0	0	0	0	0	0.00809	0
k__Bacteria|p__Firmicutes|c__Tissierellia|o__Tissierellales|f__Peptoniphilaceae|g__Peptoniphilus|s__Peptoniphilus_senegalensis|t__SGB6698	0	0	0	0	0	0	0	0	0	0	0	0	0	0	0	0	0.00135	0
k__Bacteria|p__Firmicutes|c__CFGB1424	0	0	0	0	0	0.0635	0	0	0	0	0	0	0	0	0	0	0	0
k__Bacteria|p__Firmicutes|c__CFGB1424|o__OFGB1424	0	0	0	0	0	0.0635	0	0	0	0	0	0	0	0	0	0	0	0
k__Bacteria|p__Firmicutes|c__CFGB1424|o__OFGB1424|f__FGB1424	0	0	0	0	0	0.0635	0	0	0	0	0	0	0	0	0	0	0	0
k__Bacteria|p__Bacteroidetes|c__Bacteroidia|o__Bacteroidales|f__Prevotellaceae|g__GGB1264	0	0	0	0	0	3.91473	0	0	0	0	0	0	0	0	0	0	0	0
k__Bacteria|p__Firmicutes|c__CFGB1424|o__OFGB1424|f__FGB1424|g__GGB3490	0	0	0	0	0	0.0635	0	0	0	0	0	0	0	0	0	0	0	0
k__Bacteria|p__Bacteroidetes|c__Bacteroidia|o__Bacteroidales|f__Prevotellaceae|g__GGB1264|s__GGB1264_SGB1697	0	0	0	0	0	3.91473	0	0	0	0	0	0	0	0	0	0	0	0
k__Bacteria|p__Firmicutes|c__CFGB1424|o__OFGB1424|f__FGB1424|g__GGB3490|s__GGB3490_SGB4664	0	0	0	0	0	0.0635	0	0	0	0	0	0	0	0	0	0	0	0
k__Bacteria|p__Firmicutes|c__Clostridia|o__Clostridiales|f__Ruminococcaceae|g__Faecalibacterium|s__Faecalibacterium_prausnitzii|t__SGB15322	0	0	0	0	0	4.46642	0	0	0	0	0	0	0	0	0	0	0	0
k__Bacteria|p__Bacteroidetes|c__Bacteroidia|o__Bacteroidales|f__Prevotellaceae|g__GGB1264|s__GGB1264_SGB1697|t__SGB1697	0	0	0	0	0	3.91473	0	0	0	0	0	0	0	0	0	0	0	0
k__Bacteria|p__Firmicutes|c__CFGB1424|o__OFGB1424|f__FGB1424|g__GGB3490|s__GGB3490_SGB4664|t__SGB4664	0	0	0	0	0	0.0635	0	0	0	0	0	0	0	0	0	0	0	0
