# Supplementary material for: Targeted remodeling of the human gut microbiome using Juemingzi (Senna seed extracts)
Source: Front Cell Infect Microbiol. 2024 Apr 4;14:1296619. doi: 10.3389/fcimb.2024.1296619 (PMC11024242; doi:10.3389/fcimb.2024.1296619)
Supplement: Supplementary File 4 — Excel file with MaAsLin2 results for MetaCyc pathways (sheet 1) and KEGG orthologs (KOs) (sheet 2). [file Table_4.xlsx]

## Sheet: KO_SSE_vs_NSC
KEGG Ortholog (KO)	coef	stderr	N	N.not.0	pval	qval
K07025..putative.hydrolase.of.the.HAD.superfamily	-4.19146	0.239855	12	7	7.99422e-09	2.96905e-05
K00174..2.oxoglutarate.2.oxoacid.ferredoxin.oxidoreductase.subunit.alpha..EC.1.2.7.3.1.2.7.11.	-7.16736	0.480703	12	8	3.70397e-08	3.43913e-05
K04516..chorismate.mutase..EC.5.4.99.5.	-6.49983	0.417521	12	8	2.44543e-08	3.43913e-05
K06973..NO_NAME	-8.21987	0.547233	12	8	3.45008e-08	3.43913e-05
K13789..geranylgeranyl.diphosphate.synthase..type.II..EC.2.5.1.1.2.5.1.10.2.5.1.29.	-4.81342	0.340544	12	7	6.18089e-08	4.59117e-05
K08974..putative.membrane.protein	-5.59882	0.133726	12	7	1.46639e-07	9.07695e-05
K00210..prephenate.dehydrogenase..EC.1.3.1.12.	-5.10749	0.414997	12	7	2.30233e-07	9.50097e-05
K07079..NO_NAME	-6.26901	0.501523	12	8	1.98834e-07	9.50097e-05
K10206..LL.diaminopimelate.aminotransferase..EC.2.6.1.83.	-5.39816	0.438377	12	9	2.29057e-07	9.50097e-05
K00179..indolepyruvate.ferredoxin.oxidoreductase..alpha.subunit	-4.50785	0.398924	12	7	5.13039e-07	0.000190543
K07456..DNA.mismatch.repair.protein.MutS2	-4.50296	0.406555	12	7	6.18376e-07	0.000208786
K03308..neurotransmitter.Na..symporter..NSS.family	-5.17031	0.486854	12	8	9.1355e-07	0.000282744
K00721..dolichol.phosphate.mannosyltransferase..EC.2.4.1.83.	-4.58122	0.177637	12	8	1.63717e-06	0.000433647
K01926..AT.rich.DNA.binding.protein	-5.35796	0.536945	12	8	1.62108e-06	0.000433647
K12267..peptide.methionine.sulfoxide.reductase.msrA.msrB..EC.1.8.4.11	-4.58227	0.463104	12	7	1.7514e-06	0.000433647
K18707..NO_NAME	-7.83472	0.318198	12	7	2.06078e-06	0.000478358
K18332..NO_NAME	-6.82404	0.288567	12	7	2.51793e-06	0.000519533
K19271..NO_NAME	-4.01061	0.420575	12	10	2.45259e-06	0.000519533
K04041..fructose.1.6.bisphosphatase.III..EC.3.1.3.11.	-7.29985	0.319914	12	7	3.00536e-06	0.000587468
K00812..aspartate.aminotransferase..EC.2.6.1.1.	-4.15075	0.449654	12	7	3.29305e-06	0.000611519
K21572..susD; starch-binding outer membrane protein, SusD/RagB family	-8.34497	0.376254	12	9	3.46078e-06	0.000612064
K14652..3.4.dihydroxy.2.butanone.4.phosphate.synthase...GTP.cyclohydrolase.II..EC.4.1.99.12.3.5.4.25.	-4.32664	0.479251	12	10	4.02428e-06	0.000679372
K03605..hydrogenase.1.maturation.protease	1.52771	0.175252	12	12	5.50873e-06	0.00088954
K03332..fructan.beta.fructosidase..EC.3.2.1.80.	-3.75808	0.436646	12	7	6.17291e-06	0.000955257
K01572..oxaloacetate.decarboxylase..beta.subunit..EC.4.1.1.3.	-6.30068	0.32501	12	8	6.73829e-06	0.000965624
K08678..UDP.glucuronate.decarboxylase..EC.4.1.1.35.	-5.33759	0.275509	12	7	6.75988e-06	0.000965624
K07164..NO_NAME	-6.12283	0.322446	12	8	7.43349e-06	0.00102252
K01206..alpha.L.fucosidase..EC.3.2.1.51.	-4.79698	0.270427	12	7	1.04481e-05	0.00138587
K00929..butyrate.kinase..EC.2.7.2.7.	-6.65561	0.397977	12	7	1.39688e-05	0.00172933
K01192..beta.mannosidase..EC.3.2.1.25.	-3.33418	0.424201	12	7	1.37408e-05	0.00172933
K07588..LAO.AO.transport.system.kinase	-3.43727	0.44064	12	9	1.46778e-05	0.0017585
K16363..UDP.3.O..3.hydroxymyristoyl..N.acetylglucosamine.deacetylase...3.hydroxyacyl..acyl.carrier.protein..dehydratase..EC.3.5.1.108.4.2.1.59.	-5.66086	0.361828	12	8	1.93899e-05	0.00218225
K21470..NO_NAME	1.31859	0.0840718	12	11	1.91546e-05	0.00218225
K11209..GST.like.protein	1.6235	0.215771	12	12	2.00639e-05	0.00219168
K00568..2.polyprenyl.6.hydroxyphenyl.methylase...3.demethylubiquinone.9.3.methyltransferase..EC.2.1.1.222.2.1.1.64.	1.56508	0.21199	12	12	2.36185e-05	0.00237079
K09457..7.cyano.7.deazaguanine.reductase..EC.1.7.1.13.	-3.88275	0.257678	12	10	2.3319e-05	0.00237079
K18785..NO_NAME	-6.6381	0.441247	12	8	2.35045e-05	0.00237079
K13641..NO_NAME	1.673	0.228644	12	12	2.5499e-05	0.00249219
K07000..NO_NAME	1.96732	0.136229	12	12	2.8722e-05	0.00273522
K04651..hydrogenase.nickel.incorporation.protein.HypA	1.72185	0.243919	12	12	3.46061e-05	0.00321318
K03683..ribonuclease.T	1.55571	0.22106	12	12	3.55157e-05	0.0032172
K10038..glutamine.transport.system.ATP.binding.protein..EC.3.6.3...	1.89548	0.138734	12	12	3.76721e-05	0.00333129
K21574..susB; glucan 1,4-alpha-glucosidase	-5.62074	0.413391	12	8	3.8574e-05	0.00333172
K06006..periplasmic.protein.CpxP	1.29494	0.186494	12	12	3.97782e-05	0.00335764
K09915..hypothetical.protein	1.53261	0.223334	12	12	4.39117e-05	0.00362418
K01163..hypothetical.protein	-4.29967	0.329914	12	8	4.74372e-05	0.00367046
K01468..imidazolonepropionase..EC.3.5.2.7.	-3.56126	0.522088	12	8	4.61871e-05	0.00367046
K06281..hydrogenase.large.subunit..EC.1.12.99.6.	1.80062	0.137695	12	12	4.66608e-05	0.00367046
K01646..citrate.lyase.subunit.gamma..acyl.carrier.protein.	1.48609	0.114833	12	12	4.90921e-05	0.00372098
K00625..phosphate.acetyltransferase..EC.2.3.1.8.	-2.93473	0.436868	12	9	5.24823e-05	0.00389839
K08485..phosphocarrier.protein.NPr	1.2755	0.19147	12	12	5.62701e-05	0.00409778
K00101..L.lactate.dehydrogenase..cytochrome...EC.1.1.2.3.	1.91619	0.157763	12	10	6.68496e-05	0.00423085
K00350..Na..transporting.NADH.ubiquinone.oxidoreductase.subunit.E	-3.02162	0.243905	12	9	6.07237e-05	0.00423085
K03816..xanthine.phosphoribosyltransferase..EC.2.4.2.22.	-3.26844	0.501019	12	11	6.69242e-05	0.00423085
K06202..CyaY.protein	1.75222	0.264949	12	12	5.97674e-05	0.00423085
K07052..NO_NAME	-4.5298	0.374653	12	8	6.83497e-05	0.00423085
K07407..alpha.galactosidase..EC.3.2.1.22.	-4.85658	0.396414	12	8	6.41036e-05	0.00423085
K08961..chondroitin.sulfate.ABC.endolyase	-1.73716	0.178485	12	6	6.75108e-05	0.00423085
K09939..hypothetical.protein	-5.3654	0.435736	12	8	6.2546e-05	0.00423085
K11391..ribosomal.RNA.large.subunit.methyltransferase.G	1.69385	0.138377	12	9	6.43717e-05	0.00423085
K00176..2.oxoglutarate.ferredoxin.oxidoreductase.subunit.delta..EC.1.2.7.3.	-5.24425	0.437253	12	8	7.10785e-05	0.00425783
K02123..V.A.type.H..Na..transporting.ATPase.subunit.I	-5.18948	0.432405	12	9	7.08539e-05	0.00425783
K12373..hexosaminidase..EC.3.2.1.52.	-6.60119	1.02705	12	9	7.56362e-05	0.00445893
K03699..putative.hemolysin	-3.68228	0.312705	12	7	7.76972e-05	0.00450887
K02004..NO_NAME	-2.37152	0.204737	12	12	8.41562e-05	0.00480856
K00030..isocitrate.dehydrogenase..NAD....EC.1.1.1.41.	-2.01519	0.17772	12	7	9.33002e-05	0.00481273
K02387..flagellar.basal.body.rod.protein.FlgB	1.51837	0.241632	12	12	9.09724e-05	0.00481273
K03304..tellurite.resistance.dicarboxylate.transporter..TDT.family	1.74862	0.278925	12	12	9.27191e-05	0.00481273
K03430..2.aminoethylphosphonate.pyruvate.transaminase..EC.2.6.1.37.	-3.72307	0.323039	12	7	8.9084e-05	0.00481273
K05970..sialate.O.acetylesterase	-4.26723	0.676241	12	11	8.79141e-05	0.00481273
K06155..Gnt.I.system.high.affinity.gluconate.transporter	1.59346	0.140392	12	12	9.28635e-05	0.00481273
K07192..flotillin	-4.72088	0.413641	12	7	9.04129e-05	0.00481273
K04032..ethanolamine.utilization.cobalamin.adenosyltransferase..EC.2.5.1.17.	1.93332	0.171706	12	12	9.65374e-05	0.00486151
K15987..K....stimulated.pyrophosphate.energized.sodium.pump..EC.3.6.1.1.	-4.3777	0.389073	12	11	9.68636e-05	0.00486151
K01484..succinylarginine.dihydrolase..EC.3.5.3.23.	1.50266	0.134843	12	11	0.000101482	0.00490194
K01938..formate..tetrahydrofolate.ligase..EC.6.3.4.3.	-2.98225	0.481421	12	12	0.000102163	0.00490194
K04720..threonine.phosphate.decarboxylase..EC.4.1.1.81.	-4.92662	0.443693	12	9	0.000103264	0.00490194
K15539..NO_NAME	1.89668	0.171158	12	11	0.000104269	0.00490194
K16704..NO_NAME	1.54702	0.138301	12	11	9.96446e-05	0.00490194
K13821..RHH.type.transcriptional.regulator..proline.utilization.regulon.repressor...proline.dehydrogenase...delta.1.pyrroline.5.carboxylate.dehydrogenase..EC.1.5.5.2.1.2.1.88.	1.73023	0.156937	12	12	0.000106874	0.00496162
K07638..two.component.system..OmpR.family..osmolarity.sensor.histidine.kinase.EnvZ..EC.2.7.13.3.	1.53732	0.140858	12	12	0.000112228	0.00514588
K06189..magnesium.and.cobalt.transporter	1.63473	0.150641	12	12	0.000115363	0.00516528
K13043..NO_NAME	-6.27642	0.578447	12	9	0.000115433	0.00516528
K03340..diaminopimelate.dehydrogenase..EC.1.4.1.16.	-5.63265	0.525613	12	8	0.000122569	0.00529328
K04486..histidinol.phosphatase..PHP.family...EC.3.1.3.15.	-5.51176	0.513147	12	8	0.000121214	0.00529328
K06911..NO_NAME	1.274	0.209873	12	12	0.000120325	0.00529328
K03569..rod.shape.determining.protein.MreB.and.related.proteins	1.69719	0.159123	12	12	0.000125386	0.00534868
K05787..DNA.binding.protein.HU.alpha	1.74852	0.289913	12	12	0.000126732	0.00534868
K03579..ATP.dependent.helicase.HrpB	1.84938	0.175717	12	11	0.000133699	0.00557929
K13638..NO_NAME	1.38272	0.231747	12	12	0.000138156	0.00570126
K00867..type.I.pantothenate.kinase..EC.2.7.1.33.	1.30236	0.125379	12	12	0.000142421	0.00573585
K03586..cell.division.protein.FtsL	1.90715	0.32111	12	12	0.000143294	0.00573585
K06726..D.ribose.pyranase..EC.5.4.99.62.	1.58619	0.267506	12	12	0.000145172	0.00573585
K18697..phosphatidylglycerophosphatase.C..EC.3.1.3.27.	1.35716	0.130996	12	11	0.000144223	0.00573585
K01935..dethiobiotin.synthetase..EC.6.3.3.3.	1.24853	0.121919	12	12	0.000152506	0.00590007
K02064..thiamine.transport.system.substrate.binding.protein	1.93931	0.189208	12	10	0.000151869	0.00590007
K02549..O.succinylbenzoate.synthase..EC.4.2.1.113.	1.28185	0.125802	12	12	0.000156225	0.00598166
K22306..NO_NAME	-2.99851	0.512838	12	12	0.000162292	0.00615053
K11076..putrescine.transport.system.ATP.binding.protein	1.81623	0.180319	12	10	0.000165139	0.00619521
K02467..GutQ.protein	1.53285	0.153373	12	11	0.00017142	0.0062417
K09159..hypothetical.protein	1.68013	0.289228	12	12	0.000170853	0.0062417
K18988..NO_NAME	1.68145	0.168118	12	12	0.000170813	0.0062417
K09018..pyrimidine.oxygenase..EC.1.14.99.46.	2.45777	0.423923	12	8	0.000173507	0.00625636
K11926..sigma.factor.binding.protein.Crl	1.92461	0.332386	12	12	0.00017526	0.00625879
K21575..susA; neopullulanase	-3.33458	0.33678	12	7	0.000179267	0.00634093
K01147..exoribonuclease.II	1.93103	0.198297	12	12	0.000194123	0.00634605
K01489..cytidine.deaminase..EC.3.5.4.5.	1.79962	0.31302	12	12	0.000185361	0.00634605
K01637..isocitrate.lyase..EC.4.1.3.1.	1.57282	0.161488	12	12	0.000193988	0.00634605
K02742..SprT.protein	1.31323	0.133563	12	10	0.000185382	0.00634605
K02954..small.subunit.ribosomal.protein.S14	-0.512885	0.0895375	12	12	0.00019079	0.00634605
K03647..protein.involved.in.ribonucleotide.reduction	1.81366	0.186718	12	12	0.000196499	0.00634605
K04065..hyperosmotically.inducible.periplasmic.protein	1.77415	0.182319	12	12	0.000194796	0.00634605
K05775..maltose.operon.periplasmic.protein	1.76386	0.180643	12	12	0.000191638	0.00634605
K16322..NO_NAME	1.58409	0.276517	12	12	0.000190638	0.00634605
K20490..lantibiotic.transport.system.ATP.binding.protein	-4.07134	0.708203	12	8	0.000185465	0.00634605
K06146..LacI.family.transcriptional.regulator..gluconate.utilization.system	1.1512	0.118752	12	10	0.000198366	0.00635113
K03632..chromosome.partition.protein.MukB	1.96757	0.205411	12	10	0.000210063	0.00666816
K05989..alpha.L.rhamnosidase	-5.18116	0.544687	12	7	0.000217173	0.00683544
K03305..proton.dependent.oligopeptide.transporter..POT.family	1.44496	0.152993	12	12	0.000224693	0.00701267
K11074..putrescine.transport.system.permease.protein	1.75889	0.186793	12	10	0.000227935	0.00705459
K00175..2.oxoglutarate.2.oxoacid.ferredoxin.oxidoreductase.subunit.beta..EC.1.2.7.3.1.2.7.11.	-5.73936	0.612278	12	10	0.000232906	0.00709011
K02046..sulfate.transport.system.permease.protein	1.88525	0.201806	12	12	0.000236719	0.00709011
K02379..FdhD.protein	1.56876	0.167886	12	11	0.000236442	0.00709011
K07261..penicillin.insensitive.murein.endopeptidase	1.36829	0.146214	12	11	0.000234771	0.00709011
K15829..NO_NAME	1.79596	0.193204	12	12	0.000242382	0.00720166
K21071..NO_NAME	-4.16104	0.449054	12	10	0.000246072	0.00725327
K00363..nitrite.reductase..NADH..small.subunit..EC.1.7.1.15.	2.00762	0.218449	12	10	0.000255907	0.00748377
K00389..putative.membrane.protein	1.702	0.311023	12	12	0.000272191	0.00789779
K07405..alpha.amylase..EC.3.2.1.1.	-1.88996	0.249905	12	6	0.000277798	0.00793647
K10763..DnaA.homolog.protein	1.43447	0.158574	12	12	0.000275901	0.00793647
K01372..bleomycin.hydrolase	-4.44594	0.81866	12	10	0.000288588	0.0081198
K09955..hypothetical.protein	-5.03622	0.561354	12	9	0.00028696	0.0081198
K06073..vitamin.B12.transport.system.permease.protein	2.01865	0.226599	12	11	0.000296736	0.00816354
K08990..putative.membrane.protein	1.83886	0.206205	12	12	0.000295296	0.00816354
K23003..NO_NAME	-2.59922	0.347812	12	6	0.000296201	0.00816354
K06223..DNA.adenine.methylase..EC.2.1.1.72.	2.76976	0.512873	12	12	0.000301216	0.0081696
K09922..hypothetical.protein	-2.72419	0.365668	12	6	0.000301356	0.0081696
K00632..acetyl.CoA.acyltransferase..EC.2.3.1.16.	1.66483	0.190309	12	11	0.00032344	0.00846892
K01533..Cu2..exporting.ATPase	-4.28985	0.490167	12	10	0.000322778	0.00846892
K01817..phosphoribosylanthranilate.isomerase..EC.5.3.1.24.	-3.39682	0.388163	12	10	0.000322918	0.00846892
K02906..large.subunit.ribosomal.protein.L3	-0.770887	0.0881418	12	12	0.000323798	0.00846892
K10109..maltose.maltodextrin.transport.system.permease.protein	2.08743	0.238444	12	12	0.000322331	0.00846892
K09160..hypothetical.protein	1.76767	0.330764	12	12	0.000326286	0.00847431
K15736..NO_NAME	1.87388	0.215183	12	12	0.00033049	0.00852389
K03182..4.hydroxy.3.polyprenylbenzoate.decarboxylase..EC.4.1.1.98.	2.3752	0.27355	12	10	0.000335096	0.00858307
K00346..Na..transporting.NADH.ubiquinone.oxidoreductase.subunit.A	-5.07684	0.957414	12	10	0.000346225	0.00873959
K03554..recombination.associated.protein.RdgC	1.56101	0.294395	12	12	0.000346338	0.00873959
K04092..chorismate.mutase..EC.5.4.99.5.	-3.29092	0.621547	12	10	0.000350174	0.00873959
K21471..NO_NAME	-2.37733	0.449075	12	11	0.000350619	0.00873959
K03748..SanA.protein	2.06571	0.242989	12	12	0.000370306	0.00893063
K03796..Bax.protein	1.55479	0.182887	12	12	0.000370287	0.00893063
K09895..hypothetical.protein	1.74652	0.20466	12	12	0.000363703	0.00893063
K10037..glutamine.transport.system.permease.protein	2.13814	0.251427	12	12	0.000369744	0.00893063
K12369..dipeptide.transport.system.permease.protein	1.80823	0.2117	12	12	0.000362155	0.00893063
K07014..NO_NAME	1.31003	0.154656	12	11	0.000376682	0.00896793
K16925..NO_NAME	-2.72962	0.520471	12	12	0.000376345	0.00896793
K01950..NAD..synthase..glutamine.hydrolysing...EC.6.3.5.1.	-3.06386	0.364059	12	11	0.000388387	0.009
K03667..ATP.dependent.HslUV.protease.ATP.binding.subunit.HslU	1.57291	0.186521	12	10	0.000384702	0.009
K06183..ribosomal.small.subunit.pseudouridine.synthase.A	1.61508	0.191936	12	12	0.000388637	0.009
K07240..chromate.transporter	-3.97275	0.761015	12	11	0.000389689	0.009
K07722..CopG.family.transcriptional.regulator..nickel.responsive.regulator	1.75186	0.208362	12	12	0.000390145	0.009
K02118..V.A.type.H..Na..transporting.ATPase.subunit.B	-3.90069	0.465018	12	12	0.000394446	0.00904303
K01630..2.dehydro.3.deoxyglucarate.aldolase..EC.4.1.2.20.	2.05824	0.245978	12	11	0.000399063	0.00909098
K04079..molecular.chaperone.HtpG	-2.08641	0.295194	12	6	0.000401433	0.00909098
K01061..carboxymethylenebutenolidase..EC.3.1.1.45.	1.90029	0.228369	12	10	0.000409666	0.00911077
K03525..type.III.pantothenate.kinase..EC.2.7.1.33.	-2.39187	0.46053	12	12	0.000404945	0.00911077
K18890..ATP.binding.cassette..subfamily.B..multidrug.efflux.pump	1.51107	0.181441	12	12	0.000408039	0.00911077
K06147..ATP.binding.cassette..subfamily.B..bacterial	-2.21356	0.266529	12	12	0.000413404	0.00913918
K03597..sigma.E.factor.negative.regulatory.protein.RseA	1.64671	0.199942	12	12	0.000430007	0.00928514
K03782..catalase.peroxidase..EC.1.11.1.21.	1.67185	0.202913	12	12	0.000429196	0.00928514
K04091..alkanesulfonate.monooxygenase..EC.1.14.14.5.	1.80429	0.218662	12	11	0.000426197	0.00928514
K06080..RcsF.protein	1.67199	0.20271	12	12	0.000427011	0.00928514
K13639..NO_NAME	1.89149	0.368394	12	12	0.000441339	0.00947476
K03556..LuxR.family.transcriptional.regulator..maltose.regulon.positive	1.97157	0.2414	12	11	0.000447288	0.00954729
K07784..MFS.transporter..OPA.family..hexose.phosphate.transport.protein.UhpT	2.33584	0.286369	12	10	0.000449993	0.00955014
K09791..hypothetical.protein	2.11547	0.413739	12	11	0.000455274	0.00960731
K02224..cobyrinic.acid.a.c.diamide.synthase..EC.6.3.5.9.6.3.5.11.	-2.72381	0.395612	12	6	0.000463351	0.0096679
K16013..ATP.binding.cassette..subfamily.C..bacterial.CydD	1.60066	0.197366	12	11	0.000462283	0.0096679
K06164..alpha.D.ribose.1.methylphosphonate.5.triphosphate.synthase.subunit.PhnI..EC.2.7.8.37.	2.20565	0.272829	12	11	0.000469232	0.00973591
K00124..formate.dehydrogenase.iron.sulfur.subunit	1.68485	0.209561	12	12	0.000481548	0.00984305
K03615..electron.transport.complex.protein.RnfC	-1.51453	0.188824	12	12	0.000486921	0.00984305
K03635..molybdopterin.synthase.catalytic.subunit..EC.2.8.1.12.	1.53541	0.302781	12	12	0.000484094	0.00984305
K05340..glucose.uptake.protein	-1.68699	0.247374	12	6	0.000487647	0.00984305
K09933..hypothetical.protein	1.85456	0.230472	12	11	0.000479611	0.00984305
K00349..Na..transporting.NADH.ubiquinone.oxidoreductase.subunit.D	-2.91721	0.364565	12	9	0.000492358	0.00987853
K06878..NO_NAME	1.39445	0.174443	12	11	0.000494725	0.00987853
K00974..tRNA.nucleotidyltransferase..CCA.adding.enzyme...EC.2.7.7.72.3.1.3...3.1.4...	1.51503	0.18983	12	12	0.000498437	0.00989943
K13787..geranylgeranyl.diphosphate.synthase..type.I..EC.2.5.1.1.2.5.1.10.2.5.1.29.	-2.64964	0.525516	12	11	0.000505158	0.00997956
K02297..cytochrome.o.ubiquinol.oxidase.subunit.II..EC.1.10.3.10.	1.88628	0.237668	12	12	0.00051163	0.0100539
K03296..hydrophobic.amphiphilic.exporter.1..mainly.G..bacteria...HAE1.family	-6.18149	1.231	12	10	0.00052058	0.0101557
K18682..ribonucrease.Y..EC.3.1.....	-5.18877	0.656659	12	11	0.000522278	0.0101557
K07552..MFS.transporter..DHA1.family..bicyclomycin.chloramphenicol	1.90715	0.242029	12	12	0.00052912	0.0102304
K07640..two.component.system..OmpR.family..sensor.histidine.kinase.CpxA..EC.2.7.13.3.	1.55881	0.198022	12	11	0.000531627	0.0102304
K00362..nitrite.reductase..NADH..large.subunit..EC.1.7.1.15.	2.08508	0.266427	12	12	0.000546335	0.0102999
K02972..small.subunit.ribosomal.protein.S22	2.07512	0.310003	12	6	0.000539252	0.0102999
K03088..RNA.polymerase.sigma.70.factor..ECF.subfamily	-1.94129	0.247846	12	12	0.0005442	0.0102999
K03643..LPS.assembly.lipoprotein	1.22328	0.155994	12	12	0.000541218	0.0102999
K06001..tryptophan.synthase.beta.chain..EC.4.2.1.20.	-5.80082	0.745531	12	9	0.000561357	0.0105297
K04653..hydrogenase.expression.formation.protein.HypC	1.29639	0.261356	12	12	0.000569845	0.0106352
K00879..L.fuculokinase..EC.2.7.1.51.	1.61032	0.208408	12	11	0.000579915	0.0106765
K00926..carbamate.kinase..EC.2.7.2.2.	1.41961	0.184486	12	12	0.000591196	0.0106765
K01251..adenosylhomocysteinase..EC.3.3.1.1.	-3.45461	0.448219	12	10	0.000586755	0.0106765
K03437..RNA.methyltransferase..TrmH.family	-3.26127	0.425544	12	8	0.000602501	0.0106765
K07301..NO_NAME	1.13954	0.148617	12	11	0.000601087	0.0106765
K07568..S.adenosylmethionine.tRNA.ribosyltransferase.isomerase	-1.30301	0.263886	12	12	0.000589099	0.0106765
K09181..hypothetical.protein	1.51784	0.196438	12	12	0.000579907	0.0106765
K09901..hypothetical.protein	1.84986	0.375802	12	12	0.000602682	0.0106765
K11203..PTS.system..fructose.specific.IIC.like.component	1.81993	0.237571	12	11	0.000603677	0.0106765
K11748..glutathione.regulated.potassium.efflux.system.ancillary.protein.KefG	1.47716	0.191403	12	12	0.00058318	0.0106765
K12961..NO_NAME	1.41872	0.287782	12	12	0.00059608	0.0106765
K05589..cell.division.protein.FtsB	2.33605	0.305879	12	10	0.000612349	0.0107785
K10110..maltose.maltodextrin.transport.system.permease.protein	1.65208	0.216555	12	12	0.000615444	0.0107819
K00285..D.amino.acid.dehydrogenase..EC.1.4.5.1.	1.63719	0.214973	12	12	0.000620405	0.0108178
K01146..NO_NAME	1.47084	0.193395	12	12	0.000624367	0.010836
K00067..dTDP.4.dehydrorhamnose.reductase..EC.1.1.1.133.	-3.71294	0.763371	12	9	0.0006576	0.0110015
K00164..2.oxoglutarate.dehydrogenase.E1.component..EC.1.2.4.2.	1.95817	0.258762	12	12	0.000639067	0.0110015
K00620..glutamate.N.acetyltransferase...amino.acid.N.acetyltransferase..EC.2.3.1.35.2.3.1.1.	-2.41538	0.496057	12	12	0.000652434	0.0110015
K01190..beta.galactosidase..EC.3.2.1.23.	-4.40722	0.585866	12	11	0.000657009	0.0110015
K01278..dipeptidyl.peptidase.4..EC.3.4.14.5.	-4.56828	0.604964	12	9	0.000645448	0.0110015
K03567..glycine.cleavage.system.transcriptional.repressor	1.54372	0.204751	12	12	0.000650172	0.0110015
K07136..NO_NAME	1.87309	0.247792	12	12	0.000642357	0.0110015
K07708..two.component.system..NtrC.family..nitrogen.regulation.sensor.histidine.kinase.GlnL..EC.2.7.13.3.	2.34646	0.311096	12	11	0.000648941	0.0110015
K03640..peptidoglycan.associated.lipoprotein	1.67278	0.224258	12	10	0.00068337	0.0113813
K00348..Na..transporting.NADH.ubiquinone.oxidoreductase.subunit.C	-2.9207	0.392791	12	7	0.000693419	0.011462
K03388..heterodisulfide.reductase.subunit.A..EC.1.8.98.1.	-2.43458	0.327539	12	7	0.000694646	0.011462
K14054..NO_NAME	2.12532	0.286182	12	11	0.00069747	0.011462
K02055..putative.spermidine.putrescine.transport.system.substrate.binding.protein	1.12531	0.233427	12	12	0.000701339	0.0114748
K01661..naphthoate.synthase..EC.4.1.3.36.	1.41144	0.191373	12	12	0.000720178	0.0117313
K06199..CrcB.protein	0.784955	0.106617	12	12	0.000726074	0.0117757
K05539..tRNA.dihydrouridine.synthase.A	1.80308	0.245349	12	12	0.000732212	0.0118236
K21571..susE_F; starch-binding outer membrane protein SusE/F	-1.91783	0.30368	12	6	0.000736111	0.0118351
K13283..NO_NAME	1.74967	0.238754	12	12	0.000741858	0.0118761
K00573..protein.L.isoaspartate.D.aspartate..O.methyltransferase	1.97963	0.273664	12	12	0.000787815	0.0122801
K01186..sialidase.1..EC.3.2.1.18.	-5.49339	1.15623	12	9	0.000778914	0.0122801
K01271..X.Pro.dipeptidase	2.39382	0.331289	12	11	0.000791866	0.0122801
K01720..2.methylcitrate.dehydratase..EC.4.2.1.79.	2.25575	0.312604	12	12	0.000796832	0.0122801
K01996..branched.chain.amino.acid.transport.system.ATP.binding.protein	1.17169	0.162521	12	12	0.00080016	0.0122801
K02481..two.component.system..NtrC.family..response.regulator	-1.90897	0.306124	12	6	0.000787115	0.0122801
K02560..lauroyl.Kdo2.lipid.IVA.myristoyltransferase..EC.2.3.1.243.	1.75591	0.241689	12	12	0.000772186	0.0122801
K02988..small.subunit.ribosomal.protein.S5	-1.10119	0.152182	12	12	0.000786693	0.0122801
K03477..DeoR.family.transcriptional.regulator..ulaG.and.ulaABCDEF.operon	1.73225	0.36482	12	12	0.000782327	0.0122801
K07666..two.component.system..OmpR.family..response.regulator.QseB	1.64639	0.22824	12	12	0.000798154	0.0122801
K04654..hydrogenase.expression.formation.protein.HypD	1.65639	0.230221	12	12	0.000807755	0.0123457
K00145..N.acetyl.gamma.glutamyl.phosphate.reductase..EC.1.2.1.38.	-1.58833	0.222155	12	12	0.00083158	0.0124121
K00819..ornithine..oxo.acid.transaminase..EC.2.6.1.13.	-2.40018	0.387867	12	6	0.000819454	0.0124121
K00963..UTP..glucose.1.phosphate.uridylyltransferase..EC.2.7.7.9.	1.83426	0.256591	12	12	0.000832151	0.0124121
K04765..nucleoside.triphosphate.diphosphatase..EC.3.6.1.9.	2.32292	0.324746	12	12	0.000829764	0.0124121
K06140..regulator.of.nucleoside.diphosphate.kinase	1.89218	0.40164	12	12	0.000827489	0.0124121
K22104..NO_NAME	1.7401	0.243009	12	12	0.000825693	0.0124121
K15634..probable.phosphoglycerate.mutase..EC.5.4.2.12.	1.82538	0.256232	12	12	0.000845527	0.0125612
K03780..L....tartrate.dehydratase.beta.subunit..EC.4.2.1.32.	1.91813	0.269857	12	12	0.000854344	0.0126183
K13527..proteasome.associated.ATPase	-2.23821	0.477366	12	11	0.000856171	0.0126183
K11103..aerobic.C4.dicarboxylate.transport.protein	1.91666	0.270053	12	11	0.000860232	0.0126281
K02041..phosphonate.transport.system.ATP.binding.protein..EC.3.6.3.28.	1.57368	0.222567	12	12	0.000875359	0.0127477
K02051..sulfonate.nitrate.taurine.transport.system.substrate.binding.protein	-4.84249	0.684589	12	7	0.000885545	0.0127477
K02317..DNA.replication.protein.DnaT	1.57282	0.222255	12	12	0.000871898	0.0127477
K07727..putative.transcriptional.regulator	-2.98677	0.423297	12	11	0.000883732	0.0127477
K10012..undecaprenyl.phosphate.4.deoxy.4.formamido.L.arabinose.transferase..EC.2.4.2.53.	1.977	0.279924	12	10	0.000879915	0.0127477
K06894..NO_NAME	2.01807	0.28643	12	11	0.000889742	0.0127587
K03820..apolipoprotein.N.acyltransferase	1.68917	0.240617	12	11	0.000904692	0.0129144
K17810..NO_NAME	-2.48502	0.534372	12	11	0.000907556	0.0129144
K02005..HlyD.family.secretion.protein	-6.21357	0.888967	12	9	0.00092301	0.0130782
K03414..chemotaxis.protein.CheZ	1.5845	0.226857	12	12	0.000926109	0.0130782
K00347..Na..transporting.NADH.ubiquinone.oxidoreductase.subunit.B	-4.14923	0.596039	12	9	0.000940405	0.0132264
K02567..periplasmic.nitrate.reductase.NapA..EC.1.7.99.4.	1.52599	0.219377	12	12	0.000943723	0.0132264
K03776..aerotaxis.receptor	1.26266	0.181721	12	11	0.000948502	0.0132434
K01607..4.carboxymuconolactone.decarboxylase..EC.4.1.1.44.	-1.95334	0.28158	12	12	0.000955625	0.0132446
K03641..TolB.protein	2.18378	0.315316	12	11	0.000962851	0.0132446
K07648..two.component.system..OmpR.family..aerobic.respiration.control.sensor.histidine.kinase.ArcB..EC.2.7.13.3.	1.53786	0.221833	12	12	0.000958514	0.0132446
K08305..membrane.bound.lytic.murein.transglycosylase.B	1.87602	0.270692	12	12	0.000959831	0.0132446
K01919..glutamate..cysteine.ligase..EC.6.3.2.2.	1.41179	0.204562	12	10	0.000978455	0.013248
K01962..acetyl.CoA.carboxylase.carboxyl.transferase.subunit.alpha..EC.6.4.1.2.	1.58911	0.231175	12	12	0.000996507	0.013248
K02040..phosphate.transport.system.substrate.binding.protein	-2.09452	0.457474	12	12	0.00101304	0.013248
K02063..thiamine.transport.system.permease.protein	1.93076	0.280427	12	12	0.000989211	0.013248
K02363..2.3.dihydroxybenzoate.AMP.ligase..EC.6.3.2.14.2.7.7.58.	1.82299	0.265423	12	12	0.00100038	0.013248
K02526..2.keto.3.deoxygluconate.permease	1.72254	0.250302	12	12	0.00099136	0.013248
K02769..PTS.system..fructose.specific.IIB.component..EC.2.7.1.202.	1.6653	0.243017	12	12	0.00101091	0.013248
K02770..PTS.system..fructose.specific.IIC.component	1.6653	0.243017	12	12	0.00101091	0.013248
K03271..D.sedoheptulose.7.phosphate.isomerase..EC.5.3.1.28.	1.01704	0.148311	12	12	0.00100763	0.013248
K03599..stringent.starvation.protein.A	2.11155	0.306151	12	11	0.000981323	0.013248
K05814..sn.glycerol.3.phosphate.transport.system.permease.protein	1.38949	0.20102	12	12	0.000971528	0.013248
K06214..curli.production.assembly.transport.component.CsgG	1.55234	0.225491	12	11	0.000989759	0.013248
K09474..acid.phosphatase..class.A...EC.3.1.3.2.	-5.27651	1.14756	12	6	0.000983105	0.013248
K19157..NO_NAME	-1.78349	0.25978	12	12	0.0010023	0.013248
K00766..anthranilate.phosphoribosyltransferase..EC.2.4.2.18.	-2.54008	0.555513	12	12	0.00102235	0.0132763
K02030..polar.amino.acid.transport.system.substrate.binding.protein	-2.17206	0.31765	12	12	0.00102091	0.0132763
K00042..2.hydroxy.3.oxopropionate.reductase..EC.1.1.1.60.	2.03604	0.299018	12	11	0.00104085	0.013312
K01007..pyruvate..water.dikinase..EC.2.7.9.2.	2.06769	0.303369	12	12	0.0010362	0.013312
K08591..glycerol.3.phosphate.acyltransferase.PlsY..EC.2.3.1.15.	1.6131	0.35374	12	12	0.00104197	0.013312
K13926..NO_NAME	1.80396	0.265139	12	12	0.00104454	0.013312
K15831..NO_NAME	1.65534	0.242484	12	11	0.0010287	0.013312
K15923..alpha.L.fucosidase.2..EC.3.2.1.51.	-1.66735	0.282278	12	6	0.00104661	0.013312
K04088..membrane.protease.subunit.HflK	1.42713	0.210081	12	12	0.00105202	0.0133352
K01676..fumarate.hydratase..class.I..EC.4.2.1.2.	1.75971	0.259448	12	12	0.00105965	0.0133501
K02768..PTS.system..fructose.specific.IIA.component..EC.2.7.1.202.	1.80926	0.398136	12	12	0.00106758	0.0133501
K07283..putative.salt.induced.outer.membrane.protein	2.12199	0.313309	12	10	0.00106661	0.0133501
K08309..soluble.lytic.murein.transglycosylase	1.50965	0.222723	12	12	0.00106281	0.0133501
K02195..heme.exporter.protein.C	1.49482	0.221354	12	12	0.00108097	0.0134272
K02494..outer.membrane.lipoprotein.LolB	1.64915	0.244201	12	11	0.00108084	0.0134272
K01790..dTDP.4.dehydrorhamnose.3.5.epimerase..EC.5.1.3.13.	-5.01606	0.745045	12	8	0.00109612	0.0134801
K02558..UDP.N.acetylmuramate..L.alanyl.gamma.D.glutamyl.meso.diaminopimelate	1.34379	0.199361	12	12	0.00109026	0.0134801
K11745..glutathione.regulated.potassium.efflux.system.ancillary.protein.KefC	2.40554	0.357093	12	12	0.00109324	0.0134801
K17828..dihydroorotate.dehydrogenase..NAD...catalytic.subunit..EC.1.3.1.14.	-3.90005	0.580209	12	12	0.00110417	0.0135343
K03603..GntR.family.transcriptional.regulator..negative.regulator.for.fad	1.70722	0.254294	12	12	0.00111037	0.0135468
K07659..two.component.system..OmpR.family..phosphate.regulon.response.regulator.OmpR	1.98292	0.295695	12	11	0.00111613	0.0135468
K19230..cationic.peptide.transport.system.ATP.binding.protein	1.63258	0.243436	12	12	0.0011158	0.0135468
K01698..porphobilinogen.synthase..EC.4.2.1.24.	1.70086	0.256277	12	10	0.00117024	0.0138241
K01749..hydroxymethylbilane.synthase..EC.2.5.1.61.	1.48401	0.223161	12	11	0.00115972	0.0138241
K02081..DeoR.family.transcriptional.regulator..aga.operon.transcriptional	1.13216	0.17067	12	12	0.00117281	0.0138241
K02355..elongation.factor.EF.G	-1.52593	0.229745	12	12	0.00116621	0.0138241
K02439..thiosulfate.sulfurtransferase..EC.2.8.1.1.	1.9184	0.427058	12	11	0.00115712	0.0138241
K02564..glucosamine.6.phosphate.deaminase..EC.3.5.99.6.	-1.65977	0.250317	12	12	0.0011752	0.0138241
K03560..biopolymer.transport.protein.TolR	1.7653	0.264517	12	12	0.00115476	0.0138241
K08323..mannonate.dehydratase..EC.4.2.1.8.	1.77524	0.266607	12	12	0.00115284	0.0138241
K09951..CRISPR.associated.protein.Cas2	-5.75814	0.868575	12	8	0.0011762	0.0138241
K13256..NO_NAME	1.58355	0.238709	12	12	0.00117267	0.0138241
K01933..phosphoribosylformylglycinamidine.cyclo.ligase..EC.6.3.3.1.	0.839162	0.187493	12	12	0.00118691	0.0138622
K05596..LysR.family.transcriptional.regulator..chromosome.initiation	2.15334	0.325427	12	12	0.00118633	0.0138622
K00322..NAD.P..transhydrogenase..EC.1.6.1.1.	1.92868	0.292325	12	11	0.00120217	0.0139092
K01658..anthranilate.synthase.component.II..EC.4.1.3.27.	-5.4697	1.22385	12	6	0.00119879	0.0139092
K06195..ApaG.protein	1.51887	0.229999	12	10	0.00119713	0.0139092
K01057..6.phosphogluconolactonase..EC.3.1.1.31.	-3.23196	0.490633	12	10	0.00121084	0.0139661
K06858..vitamin.B12.transport.system.substrate.binding.protein	1.20333	0.183222	12	11	0.00122751	0.0141144
K07037..NO_NAME	-1.80304	0.315211	12	6	0.00123786	0.0141896
K01628..L.fuculose.phosphate.aldolase..EC.4.1.2.17.	2.23442	0.341755	12	11	0.00125292	0.0142329
K01697..cystathionine.beta.synthase..EC.4.2.1.22.	-2.54061	0.572374	12	12	0.00125697	0.0142329
K03320..ammonium.transporter..Amt.family	1.42093	0.2171	12	12	0.0012469	0.0142329
K08137..MFS.transporter..SP.family..galactose.H..symporter	2.12917	0.325881	12	12	0.00125686	0.0142329
K07490..ferrous.iron.transport.protein.C	1.77715	0.40075	12	12	0.00126514	0.0142819
K04652..hydrogenase.nickel.incorporation.protein.HypB	1.4871	0.228258	12	12	0.00127323	0.0143296
K05816..sn.glycerol.3.phosphate.transport.system.ATP.binding.protein..EC.3.6.3.20.	1.4235	0.219543	12	12	0.00130121	0.0144708
K10111..multiple.sugar.transport.system.ATP.binding.protein..EC.3.6.3...	1.5615	0.240833	12	12	0.00130135	0.0144708
K11940..heat.shock.protein.HspQ	1.77368	0.273523	12	12	0.00130061	0.0144708
K21573..susC; TonB-dependent starch-binding outer membrane protein SusC	-3.23301	0.731758	12	7	0.00129786	0.0144708
K00380..sulfite.reductase..NADPH..flavoprotein.alpha.component..EC.1.8.1.2.	1.99853	0.309727	12	12	0.00133017	0.014747
K16926..NO_NAME	-2.30621	0.52445	12	12	0.00134051	0.0148175
K03840..flavodoxin.II	1.90541	0.296317	12	12	0.0013512	0.0148913
K06186..small.protein.A	1.81415	0.413628	12	11	0.00136468	0.0149953
K12661..L.rhamnonate.dehydratase..EC.4.2.1.90.	1.31179	0.205519	12	10	0.00139736	0.0153091
K02402..flagellar.transcriptional.activator.FlhC	1.6837	0.263961	12	12	0.00140157	0.0153101
K01802..peptidylprolyl.isomerase	-2.61077	0.600505	12	12	0.00144895	0.0155541
K03092..RNA.polymerase.sigma.54.factor	-2.35191	0.42358	12	6	0.00144217	0.0155541
K05516..curved.DNA.binding.protein	1.55254	0.244829	12	12	0.00143924	0.0155541
K08162..MFS.transporter..DHA1.family..multidrug.resistance.protein	2.33446	0.368687	12	12	0.00144903	0.0155541
K09889..hypothetical.protein	1.80894	0.284926	12	12	0.00143161	0.0155541
K12975..KDO.II.ethanolaminephosphotransferase..EC.2.7.8.42.	1.66235	0.262074	12	12	0.00143747	0.0155541
K04072..acetaldehyde.dehydrogenase...alcohol.dehydrogenase..EC.1.2.1.10.1.1.1.1.	1.05102	0.166237	12	12	0.00145882	0.0155691
K15833..NO_NAME	1.49462	0.236305	12	12	0.00145614	0.0155691
K03735..ethanolamine.ammonia.lyase.large.subunit..EC.4.3.1.7.	1.7363	0.27491	12	12	0.00146566	0.0155973
K02575..MFS.transporter..NNP.family..nitrate.nitrite.transporter	1.81698	0.288107	12	12	0.00147541	0.015632
K03071..preprotein.translocase.subunit.SecB	1.91187	0.30324	12	12	0.00147734	0.015632
K18889..ATP.binding.cassette..subfamily.B..multidrug.efflux.pump	1.42876	0.226952	12	12	0.00148731	0.0156484
K19229..cationic.peptide.transport.system.ATP.binding.protein	1.60777	0.255286	12	12	0.00148466	0.0156484
K00575..chemotaxis.protein.methyltransferase.CheR..EC.2.1.1.80.	1.38979	0.221309	12	12	0.00150402	0.0156559
K02255..ferritin.like.protein.2	1.03565	0.164911	12	11	0.00150383	0.0156559
K07271..lipopolysaccharide.cholinephosphotransferase	-2.76695	0.440214	12	8	0.00149797	0.0156559
K09690..lipopolysaccharide.transport.system.permease.protein	-3.82919	0.885675	12	6	0.00150489	0.0156559
K05245..L.carnitine.gamma.butyrobetaine.antiporter	1.57318	0.251295	12	12	0.00152536	0.0158105
K08484..phosphotransferase.system..enzyme.I..PtsP..EC.2.7.3.9.	1.90406	0.304276	12	11	0.00152826	0.0158105
K01493..dCMP.deaminase..EC.3.5.4.12.	-3.40049	0.544413	12	11	0.001541	0.015898
K00840..succinylornithine.aminotransferase..EC.2.6.1.81.	1.63077	0.262165	12	12	0.00156998	0.0161074
K10006..glutamate.transport.system.permease.protein	-2.28302	0.531173	12	12	0.0015662	0.0161074
K02598..nitrite.transporter.NirC	1.71639	0.276311	12	12	0.00157981	0.0161226
K15585..nickel.transport.system.permease.protein	1.37375	0.221162	12	11	0.00158013	0.0161226
K02408..flagellar.hook.basal.body.complex.protein.FliE	2.04827	0.3301	12	11	0.00158762	0.0161545
K03670..periplasmic.glucans.biosynthesis.protein	2.45788	0.397697	12	11	0.00161642	0.0161906
K03809..NAD.P.H.dehydrogenase..quinone...EC.1.6.5.2.	1.4019	0.226913	12	12	0.00161893	0.0161906
K04771..serine.protease.Do..EC.3.4.21.107.	1.91906	0.310738	12	11	0.00162168	0.0161906
K07285..outer.membrane.lipoprotein	1.88724	0.305422	12	12	0.00161779	0.0161906
K10036..glutamine.transport.system.substrate.binding.protein	1.95916	0.316996	12	12	0.00161628	0.0161906
K10537..L.arabinose.transport.system.substrate.binding.protein	2.25124	0.363559	12	11	0.00160242	0.0161906
K18220..NO_NAME	-2.1569	0.348866	12	12	0.00161369	0.0161906
K01845..glutamate.1.semialdehyde.2.1.aminomutase..EC.5.4.3.8.	2.67121	0.432896	12	9	0.0016279	0.0162092
K01825..3.hydroxyacyl.CoA.dehydrogenase...enoyl.CoA.hydratase...3.hydroxybutyryl.CoA.epimerase...enoyl.CoA.isomerase..EC.1.1.1.35.4.2.1.17.5.1.2.3.5.3.3.8.	1.52996	0.248111	12	12	0.00163283	0.0162148
K05776..molybdate.transport.system.ATP.binding.protein	1.76791	0.287135	12	12	0.00164399	0.0162821
K09999..arginine.transport.system.permease.protein	1.5786	0.257039	12	12	0.00166286	0.0164251
K03311..branched.chain.amino.acid.cation.transporter..LIVCS.family	1.3047	0.213205	12	11	0.00168994	0.0166484
K01582..lysine.decarboxylase..EC.4.1.1.18.	1.59504	0.260895	12	11	0.00169706	0.0166743
K21695..NO_NAME	2.33989	0.551353	12	10	0.00170586	0.0167165
K11732..phenylalanine.specific.permease	1.46683	0.240343	12	12	0.00171043	0.0167172
K22041..NO_NAME	2.09672	0.343995	12	11	0.00172037	0.0167702
K03326..C4.dicarboxylate.transporter..DcuC.family	1.75758	0.288541	12	11	0.00172534	0.0167746
K00163..pyruvate.dehydrogenase.E1.component..EC.1.2.4.1.	1.79524	0.295281	12	12	0.00174004	0.0167846
K02302..uroporphyrin.III.C.methyltransferase...precorrin.2.dehydrogenase...sirohydrochlorin.ferrochelatase..EC.2.1.1.107.1.3.1.76.4.99.1.4.	1.98845	0.326898	12	12	0.00173618	0.0167846
K02393..flagellar.L.ring.protein.precursor.FlgH	1.88992	0.311851	12	12	0.00176521	0.0167846
K02495..oxygen.independent.coproporphyrinogen.III.oxidase..EC.1.3.99.22.	1.61594	0.266855	12	12	0.00177156	0.0167846
K02498..HemY.protein	1.30115	0.214389	12	11	0.00175379	0.0167846
K03487..LacI.family.transcriptional.regulator..asc.operon.repressor	1.12534	0.185839	12	11	0.00177156	0.0167846
K05540..tRNA.dihydrouridine.synthase.B	1.52499	0.25178	12	12	0.00176979	0.0167846
K07221..outer.membrane.porin	-1.68542	0.31542	12	6	0.00175534	0.0167846
K09021..aminoacrylate.peracid.reductase	1.8224	0.299749	12	11	0.00174007	0.0167846
K09161..hypothetical.protein	1.62165	0.266887	12	12	0.0017447	0.0167846
K00799..glutathione.S.transferase..EC.2.5.1.18.	1.28143	0.211859	12	11	0.00178074	0.0168286
K07404..6.phosphogluconolactonase..EC.3.1.1.31.	1.81006	0.299514	12	12	0.00178762	0.0168509
K03417..methylisocitrate.lyase..EC.4.1.3.30.	1.94721	0.322675	12	11	0.00179923	0.0169173
K07336..PKHD.type.hydroxylase	1.347	0.223469	12	11	0.00180852	0.0169617
K00884..N.acetylglucosamine.kinase..EC.2.7.1.59.	2.04001	0.338898	12	11	0.00181947	0.0169847
K01207..beta.N.acetylhexosaminidase..EC.3.2.1.52.	1.58693	0.264093	12	12	0.00183383	0.0169847
K08227..MFS.transporter..LPLT.family..lysophospholipid.transporter	2.25934	0.375737	12	12	0.00182822	0.0169847
K11736..proline.specific.permease.ProY	1.54833	0.257605	12	9	0.00183176	0.0169847
K16066..3.hydroxy.acid.dehydrogenase...malonic.semialdehyde.reductase..EC.1.1.1.381.1.1.1...	1.50503	0.250276	12	12	0.00182768	0.0169847
K07503..hypothetical.protein	-2.34644	0.559695	12	11	0.00185102	0.0171012
K01858..myo.inositol.1.phosphate.synthase..EC.5.5.1.4.	-2.52047	0.60255	12	11	0.00187873	0.0172731
K10000..arginine.transport.system.ATP.binding.protein..EC.3.6.3...	2.08647	0.349161	12	11	0.00188003	0.0172731
K15827..NO_NAME	1.73568	0.415098	12	12	0.00188358	0.0172731
K05798..LysR.family.transcriptional.regulator..transcriptional.activator.for	2.21097	0.37038	12	11	0.00188877	0.0172781
K01880..glycyl.tRNA.synthetase..EC.6.1.1.14.	-2.09364	0.501149	12	12	0.00189472	0.0172899
K00835..valine..pyruvate.aminotransferase..EC.2.6.1.66.	1.77629	0.299225	12	12	0.00193638	0.0172939
K01183..chitinase..EC.3.2.1.14.	-1.83684	0.350297	12	6	0.00193076	0.0172939
K01895..acetyl.CoA.synthetase..EC.6.2.1.1.	2.26308	0.381306	12	10	0.00193816	0.0172939
K02431..L.fucose.mutarotase	2.24933	0.377621	12	12	0.00190707	0.0172939
K02994..small.subunit.ribosomal.protein.S8	-0.865984	0.145528	12	12	0.00191559	0.0172939
K03186..flavin.prenyltransferase..EC.2.5.1.129.	1.11276	0.267356	12	12	0.00194231	0.0172939
K04568..lysyl.tRNA.synthetase..class.II	1.5912	0.267433	12	12	0.00191668	0.0172939
K07751..PepB.aminopeptidase..EC.3.4.11.23.	1.38025	0.231986	12	12	0.00191691	0.0172939
K08194..MFS.transporter..ACS.family..D.galactonate.transporter	2.66934	0.64155	12	10	0.00194637	0.0172939
K08312..ADP.ribose.diphosphatase..EC.3.6.1...	1.98077	0.333478	12	12	0.00193138	0.0172939
K12957..NO_NAME	1.76925	0.29817	12	12	0.00194012	0.0172939
K11183..phosphocarrier.protein.FPr	1.93795	0.32727	12	12	0.00195794	0.0173551
K00090..gluconate.2.dehydrogenase..EC.1.1.1.215.	1.73339	0.293905	12	12	0.00199341	0.0173791
K01200..pullulanase	-2.54482	0.43074	12	12	0.00197806	0.0173791
K02426..cysteine.desulfuration.protein.SufE	1.4274	0.241642	12	12	0.00197944	0.0173791
K07287..lipoprotein.34	1.71168	0.289434	12	12	0.00196931	0.0173791
K09920..hypothetical.protein	1.87807	0.318387	12	12	0.00199204	0.0173791
K10013..lysine.arginine.ornithine.transport.system.substrate.binding.protein	2.25962	0.382869	12	10	0.00198737	0.0173791
K12372..dipeptide.transport.system.ATP.binding.protein	2.32874	0.39424	12	10	0.00197973	0.0173791
K04062..osmotically.inducible.lipoprotein.OsmB	1.595	0.385024	12	11	0.0020035	0.0174262
K05881..PTS.hybrid.protein	1.73805	0.295293	12	11	0.00201153	0.0174306
K06176..tRNA.pseudouridine.synthase.D	1.30259	0.221355	12	11	0.00201339	0.0174306
K06978..NO_NAME	-1.8326	0.35276	12	6	0.00202494	0.0174898
K00656..formate.C.acetyltransferase..EC.2.3.1.54.	0.731971	0.125124	12	12	0.00206702	0.0175044
K02438..glycogen.operon.protein..EC.3.2.1...	2.54246	0.43445	12	11	0.00206365	0.0175044
K05770..benzodiazapine.receptor	-2.4258	0.467509	12	6	0.00203671	0.0175044
K06215..pyridoxal.5..phosphate.synthase.pdxS.subunit..EC.4.3.3.6.	-2.11951	0.513646	12	11	0.00205599	0.0175044
K06445..acyl.CoA.dehydrogenase..EC.1.3.99...	2.18956	0.374367	12	12	0.00206904	0.0175044
K07400..Fe.S.biogenesis.protein.NfuA	1.74653	0.298218	12	12	0.0020567	0.0175044
K12299..MFS.transporter..ACS.family..probable.galactarate.transporter	2.44713	0.417743	12	12	0.00205449	0.0175044
K14058..NO_NAME	1.97416	0.336748	12	10	0.00204755	0.0175044
K19803..NO_NAME	1.21947	0.20849	12	10	0.00206848	0.0175044
K00340..NADH.quinone.oxidoreductase.subunit.K..EC.1.6.5.3.	1.45263	0.352579	12	12	0.00207708	0.0175143
K01070..S.formylglutathione.hydrolase..EC.3.1.2.12.	2.01726	0.34551	12	12	0.00208517	0.0175143
K11107..ferredoxin	1.47643	0.358671	12	12	0.00208907	0.0175143
K13747..carboxynorspermidine.decarboxylase..EC.4.1.1.96.	-2.86569	0.695713	12	9	0.00208018	0.0175143
K03745..SlyX.protein	1.92029	0.331943	12	11	0.00217226	0.0176538
K03775..FKBP.type.peptidyl.prolyl.cis.trans.isomerase.SlyD	1.58562	0.272797	12	11	0.00212706	0.0176538
K06910..NO_NAME	0.630889	0.10849	12	12	0.00212263	0.0176538
K07009..NO_NAME	-2.14877	0.524617	12	11	0.00215874	0.0176538
K07112..NO_NAME	1.43514	0.247216	12	12	0.00213888	0.0176538
K07788..multidrug.efflux.pump	3.24377	0.558935	12	11	0.00214169	0.0176538
K08172..MFS.transporter..MHS.family..shikimate.and.dehydroshikimate	1.92337	0.332335	12	12	0.00216822	0.0176538
K10112..multiple.sugar.transport.system.ATP.binding.protein	1.25053	0.216105	12	11	0.00216948	0.0176538
K12308..beta.galactosidase..EC.3.2.1.23.	-2.65493	0.646908	12	12	0.00213078	0.0176538
K13571..NO_NAME	-2.66348	0.459741	12	12	0.00215825	0.0176538
K13620..NO_NAME	1.69263	0.292343	12	12	0.00216415	0.0176538
K14261..NO_NAME	2.07887	0.358801	12	12	0.00215742	0.0176538
K14534..4.hydroxybutyryl.CoA.dehydratase...vinylacetyl.CoA.Delta.isomerase..EC.4.2.1.120.5.3.3.3.	-3.00655	0.732726	12	6	0.00213351	0.0176538
K17713..NO_NAME	1.31124	0.225612	12	12	0.00212792	0.0176538
K03835..tryptophan.specific.transport.protein	1.42754	0.24763	12	12	0.00220625	0.0178909
K02047..sulfate.transport.system.permease.protein	2.07138	0.359779	12	11	0.00221895	0.0179156
K07589..D.erythro.7.8.dihydroneopterin.triphosphate.epimerase	1.3043	0.226502	12	11	0.00221709	0.0179156
K00208..enoyl..acyl.carrier.protein..reductase.I..EC.1.3.1.9.1.3.1.10.	1.49611	0.26031	12	12	0.00223599	0.0179257
K02686..primosomal.replication.protein.N	1.78734	0.310723	12	12	0.00222778	0.0179257
K03580..ATP.dependent.helicase.HepA	1.66097	0.289189	12	12	0.00224271	0.0179257
K11202..PTS.system..fructose.specific.IIB.like.component	1.43815	0.250429	12	12	0.00224412	0.0179257
K13014..undecaprenyl.phosphate.alpha.L.ara4FN.deformylase..EC.3.5.1...	1.62816	0.283522	12	11	0.00224433	0.0179257
K01480..agmatinase..EC.3.5.3.11.	1.36455	0.238086	12	12	0.00226393	0.0180047
K02413..flagellar.FliJ.protein	1.65383	0.288503	12	12	0.00226202	0.0180047
K06902..MFS.transporter..UMF1.family	-2.21668	0.545326	12	12	0.00226877	0.0180047
K01586..diaminopimelate.decarboxylase..EC.4.1.1.20.	-1.13401	0.198275	12	12	0.00228498	0.0180947
K00425..cytochrome.d.ubiquinol.oxidase.subunit.I..EC.1.10.3.14.	1.05718	0.185162	12	12	0.0023026	0.0181954
K01961..acetyl.CoA.carboxylase..biotin.carboxylase.subunit..EC.6.4.1.2.6.3.4.14.	1.39154	0.243842	12	12	0.0023075	0.0181954
K13498..indole.3.glycerol.phosphate.synthase...phosphoribosylanthranilate.isomerase..EC.4.1.1.48.5.3.1.24.	2.48547	0.435835	12	9	0.00231458	0.0182126
K02415..flagellar.FliL.protein	1.87255	0.32917	12	11	0.00234005	0.01835
K06141..MFS.transporter..TsgA.protein	1.89975	0.334011	12	12	0.00234192	0.01835
K09899..hypothetical.protein	1.5617	0.274915	12	12	0.00235472	0.0184114
K02042..phosphonate.transport.system.permease.protein	1.47608	0.260042	12	12	0.00236272	0.0184351
K06222..2.5.diketo.D.gluconate.reductase.B	1.67706	0.295623	12	12	0.00236891	0.0184447
K00262..glutamate.dehydrogenase..NADP....EC.1.4.1.4.	-1.46235	0.257974	12	12	0.00237696	0.0184687
K00111..glycerol.3.phosphate.dehydrogenase..EC.1.1.5.3.	1.39398	0.247254	12	12	0.00243484	0.0184901
K00426..cytochrome.d.ubiquinol.oxidase.subunit.II..EC.1.10.3.14.	0.927687	0.164632	12	12	0.00244039	0.0184901
K01201..glucosylceramidase..EC.3.2.1.45.	-3.22528	0.572797	12	10	0.00244834	0.0184901
K01256..aminopeptidase.N..EC.3.4.11.2.	1.3684	0.241977	12	11	0.00240218	0.0184901
K02100..MFS.transporter..SP.family..arabinose.H..symporter	2.80572	0.49603	12	12	0.0023998	0.0184901
K02446..fructose.1.6.bisphosphatase.II..EC.3.1.3.11.	1.94639	0.345172	12	12	0.00243277	0.0184901
K03808..paraquat.inducible.protein.A	1.22352	0.216256	12	11	0.00239717	0.0184901
K04023..ethanolamine.transporter	1.72287	0.304821	12	12	0.00240783	0.0184901
K07058..NO_NAME	1.59252	0.282701	12	12	0.00244361	0.0184901
K08308..membrane.bound.lytic.murein.transglycosylase.E	2.42938	0.431491	12	11	0.00244942	0.0184901
K09680..type.II.pantothenate.kinase..EC.2.7.1.33.	-3.22636	0.571665	12	7	0.00242348	0.0184901
K09908..hypothetical.protein	2.51923	0.447022	12	10	0.0024391	0.0184901
K09911..hypothetical.protein	2.09102	0.370675	12	11	0.00242852	0.0184901
K10831..taurine.transport.system.ATP.binding.protein..EC.3.6.3.36.	1.45544	0.258286	12	10	0.00244021	0.0184901
K07811..trimethylamine.N.oxide.reductase..cytochrome.c...EC.1.7.2.3.	2.08607	0.370835	12	11	0.00245875	0.0185229
K07675..two.component.system..NarL.family..sensor.histidine.kinase.UhpB..EC.2.7.13.3.	2.41739	0.430329	12	11	0.00247385	0.0185989
K00344..NADPH2.quinone.reductase	2.80384	0.499798	12	12	0.00248865	0.0186724
K02298..cytochrome.o.ubiquinol.oxidase.subunit.I..EC.1.10.3.10.	1.62563	0.289988	12	12	0.00249669	0.0186908
K08298..crotonobetainyl.CoA.carnitine.CoA.transferase	1.6046	0.286353	12	12	0.00250116	0.0186908
K01470..creatinine.amidohydrolase..EC.3.5.2.10.	-1.72576	0.34739	12	6	0.0025309	0.0188392
K03924..MoxR.like.ATPase	1.39167	0.249028	12	12	0.00253117	0.0188392
K00127..formate.dehydrogenase.subunit.gamma	1.44085	0.258258	12	12	0.0025498	0.0189399
K01497..GTP.cyclohydrolase.II..EC.3.5.4.25.	2.33912	0.419758	12	10	0.00256314	0.0189632
K02794..PTS.system..mannose.specific.IIB.component..EC.2.7.1.191.	1.78878	0.320966	12	12	0.00256196	0.0189632
K03212..RNA.methyltransferase..TrmA.family	1.5105	0.27161	12	10	0.00258601	0.0190187
K03732..ATP.dependent.RNA.helicase.RhlB..EC.3.6.4.13.	1.61971	0.291055	12	12	0.00257853	0.0190187
K10563..formamidopyrimidine.DNA.glycosylase..EC.3.2.2.23.4.2.99.18.	1.6916	0.304056	12	12	0.0025816	0.0190187
K01442..choloylglycine.hydrolase..EC.3.5.1.24.	-3.7	0.667306	12	11	0.00262027	0.0192326
K05916..nitric.oxide.dioxygenase..EC.1.14.12.17.	1.66367	0.300966	12	12	0.00265571	0.0194543
K09774..lipopolysaccharide.export.system.protein.LptA	1.37266	0.248509	12	11	0.0026645	0.0194802
K07402..xanthine.dehydrogenase.accessory.factor	0.984387	0.178319	12	11	0.00267139	0.0194922
K03566..LysR.family.transcriptional.regulator..glycine.cleavage.system	1.85905	0.337481	12	12	0.00269648	0.01956
K06177..ribosomal.large.subunit.pseudouridine.synthase.A	1.10394	0.200331	12	12	0.0026923	0.01956
K09825..Fur.family.transcriptional.regulator..peroxide.stress.response	-2.16019	0.545754	12	6	0.00269437	0.01956
K07862..serine.threonine.transporter	0.594597	0.107993	12	12	0.00270235	0.0195644
K00371..nitrate.reductase...nitrite.oxidoreductase..beta.subunit..EC.1.7.5.1.1.7.99.4.	2.27383	0.413724	12	12	0.00272375	0.019595
K01879..glycyl.tRNA.synthetase.beta.chain..EC.6.1.1.14.	2.62168	0.477377	12	11	0.00273283	0.019595
K09762..hypothetical.protein	-2.0408	0.516219	12	11	0.00271547	0.019595
K12264..anaerobic.nitric.oxide.reductase.flavorubredoxin	1.70586	0.310365	12	12	0.0027231	0.019595
K14742..NO_NAME	1.18449	0.215684	12	11	0.00273296	0.019595
K08300..ribonuclease.E..EC.3.1.26.12.	0.970754	0.177487	12	11	0.00278227	0.0199101
K07768..two.component.system..OmpR.family..sensor.histidine.kinase.SenX3..EC.2.7.13.3.	-2.556	0.649343	12	11	0.00279164	0.0199388
K07713..two.component.system..NtrC.family..response.regulator.HydG	1.2931	0.237282	12	12	0.00282683	0.0200934
K09896..hypothetical.protein	1.3397	0.245697	12	12	0.00282	0.0200934
K09914..putative.lipoprotein	1.27111	0.233297	12	12	0.00282952	0.0200934
K10040..putative.glutamine.transport.system.permease.protein	-2.16405	0.398047	12	11	0.00285645	0.0202459
K02527..3.deoxy.D.manno.octulosonic.acid.transferase..EC.2.4.99.12.2.4.99.13.2.4.99.14.2.4.99.15.	1.14528	0.210931	12	12	0.00287271	0.0203224
K01419..ATP.dependent.HslUV.protease..peptidase.subunit.HslV	1.97433	0.363898	12	12	0.00288229	0.020342
K10119..raffinose.stachyose.melibiose.transport.system.permease.protein	-2.32938	0.594883	12	12	0.00288643	0.020342
K08315..hydrogenase.3.maturation.protease	2.0332	0.375065	12	12	0.0028929	0.0203489
K03407..two.component.system..chemotaxis.family..sensor.kinase.CheA..EC.2.7.13.3.	2.3086	0.4266	12	12	0.00291477	0.0204254
K03756..putrescine.ornithine.antiporter	1.78555	0.329862	12	10	0.00291143	0.0204254
K02068..putative.ABC.transport.system.ATP.binding.protein	1.44077	0.266382	12	11	0.00292171	0.0204355
K10254..myosin.crossreactive.antigen	-2.3642	0.43736	12	12	0.00292892	0.0204474
K15726..NO_NAME	-2.85833	0.592846	12	6	0.00293505	0.0204517
K06518..holin.like.protein	1.5775	0.292179	12	12	0.00294442	0.0204531
K17247..NO_NAME	1.52857	0.283156	12	11	0.00294626	0.0204531
K02420..flagellar.biosynthetic.protein.FliQ	2.28003	0.423051	12	12	0.0029674	0.0205614
K00048..lactaldehyde.reductase..EC.1.1.1.77.	1.58879	0.295097	12	12	0.00298072	0.0205768
K02799..PTS.system..mannitol.specific.IIB.component..EC.2.7.1.197.	1.77357	0.329836	12	12	0.00299732	0.0205768
K02800..PTS.system..mannitol.specific.IIC.component	1.77357	0.329836	12	12	0.00299732	0.0205768
K05805..CreA.protein	1.85249	0.34438	12	12	0.00299225	0.0205768
K12524..bifunctional.aspartokinase...homoserine.dehydrogenase.1..EC.2.7.2.4.1.1.1.3.	1.19988	0.222768	12	12	0.00297528	0.0205768
K00850..6.phosphofructokinase.1..EC.2.7.1.11.	-1.0419	0.194564	12	12	0.00305166	0.0206822
K01523..phosphoribosyl.ATP.pyrophosphohydrolase..EC.3.6.1.31.	-2.167	0.558128	12	12	0.0030459	0.0206822
K01878..glycyl.tRNA.synthetase.alpha.chain..EC.6.1.1.14.	1.92669	0.359567	12	10	0.00304342	0.0206822
K02535..UDP.3.O..3.hydroxymyristoyl..N.acetylglucosamine.deacetylase..EC.3.5.1.108.	1.70973	0.318522	12	12	0.00302037	0.0206822
K06282..hydrogenase.small.subunit..EC.1.12.99.6.	1.74254	0.325269	12	12	0.00304622	0.0206822
K09904..hypothetical.protein	2.01909	0.519952	12	11	0.00304289	0.0206822
K13497..anthranilate.synthase.phosphoribosyltransferase..EC.4.1.3.27.2.4.2.18.	1.6732	0.312043	12	12	0.00303418	0.0206822
K01491..methylenetetrahydrofolate.dehydrogenase..NADP.....methenyltetrahydrofolate.cyclohydrolase..EC.1.5.1.5.3.5.4.9.	-1.17002	0.219499	12	12	0.00311359	0.0207713
K02077..zinc.manganese.transport.system.substrate.binding.protein	-2.09852	0.541863	12	12	0.00309513	0.0207713
K02182..crotonobetaine.carnitine.CoA.ligase	1.59015	0.298597	12	12	0.00312633	0.0207713
K02197..cytochrome.c.type.biogenesis.protein.CcmE	2.70221	0.505954	12	12	0.0030872	0.0207713
K03532..trimethylamine.N.oxide.reductase..cytochrome.c...cytochrome.c.type.subunit.TorC	1.53106	0.286946	12	12	0.00310007	0.0207713
K03608..cell.division.topological.specificity.factor	1.61742	0.303691	12	12	0.00312508	0.0207713
K03634..outer.membrane.lipoproteins.carrier.protein	1.71216	0.320531	12	11	0.00308517	0.0207713
K04087..membrane.protease.subunit.HflC	1.53947	0.28836	12	12	0.00309256	0.0207713
K06861..lipopolysaccharide.export.system.ATP.binding.protein..EC.3.6.3...	1.76545	0.331234	12	12	0.00311481	0.0207713
K07806..UDP.4.amino.4.deoxy.L.arabinose.oxoglutarate.aminotransferase..EC.2.6.1.87.	1.95464	0.366927	12	9	0.0031221	0.0207713
K13378..NADH.quinone.oxidoreductase.subunit.C.D..EC.1.6.5.3.	-1.51019	0.282594	12	12	0.00307912	0.0207713
K03777..D.lactate.dehydrogenase..EC.1.1.1.28.	1.49956	0.282434	12	12	0.00316747	0.0208716
K05501..TetR.AcrR.family.transcriptional.regulator	1.7015	0.320381	12	12	0.00316373	0.0208716
K06346..spoIIIJ.associated.protein	-2.26732	0.587678	12	12	0.00317008	0.0208716
K07133..NO_NAME	-2.28689	0.430961	12	12	0.00317513	0.0208716
K09125..hypothetical.protein	1.74013	0.327718	12	12	0.00316643	0.0208716
K19775..NO_NAME	1.40906	0.265361	12	11	0.00316607	0.0208716
K02824..uracil.permease	2.12835	0.402167	12	12	0.00321253	0.0209003
K03562..biopolymer.transport.protein.TolQ	1.93016	0.364678	12	11	0.00321105	0.0209003
K03721..transcriptional.regulator.of.aroF..aroG..tyrA.and.aromatic.amino	1.43164	0.270026	12	10	0.00318725	0.0209003
K04047..starvation.inducible.DNA.binding.protein	1.50833	0.285024	12	12	0.00321326	0.0209003
K06968..NO_NAME	1.9978	0.377183	12	12	0.00320094	0.0209003
K07177..Lon.like.protease	-3.17649	0.8247	12	10	0.00320339	0.0209003
K03604..LacI.family.transcriptional.regulator..purine.nucleotide.synthesis	1.91162	0.36161	12	11	0.00322786	0.0209585
K00998..CDP.diacylglycerol...serine.O.phosphatidyltransferase..EC.2.7.8.8.	1.74274	0.330151	12	12	0.00324868	0.0209976
K01963..acetyl.CoA.carboxylase.carboxyl.transferase.subunit.beta..EC.6.4.1.2.	1.47186	0.278969	12	12	0.00325548	0.0209976
K02895..large.subunit.ribosomal.protein.L24	-0.696655	0.132208	12	12	0.00327345	0.0209976
K05595..multiple.antibiotic.resistance.protein	1.37026	0.356738	12	12	0.00325937	0.0209976
K06866..autonomous.glycyl.radical.cofactor	1.79924	0.341414	12	12	0.0032719	0.0209976
K14187..chorismate.mutase...prephenate.dehydrogenase..EC.5.4.99.5.1.3.1.12.	1.66471	0.315563	12	12	0.00325735	0.0209976
K16089..NO_NAME	-1.31218	0.341783	12	11	0.00326918	0.0209976
K17686..Cu..exporting.ATPase..EC.3.6.3.54.	2.65225	0.505329	12	12	0.00333021	0.0213248
K03750..molybdopterin.biosynthesis.protein.MoeA	1.54313	0.294157	12	12	0.00333738	0.021334
K03535..MFS.transporter..ACS.family..glucarate.transporter	1.57236	0.30048	12	12	0.00337383	0.0214747
K09760..DNA.recombination.protein.RmuC	1.28002	0.244856	12	12	0.00338832	0.0214747
K09892..hypothetical.protein	1.49693	0.286311	12	12	0.00338643	0.0214747
K15832..NO_NAME	1.90685	0.364515	12	12	0.0033784	0.0214747
K20074..NO_NAME	-2.22108	0.424258	12	11	0.0033672	0.0214747
K03704..cold.shock.protein..beta.ribbon..CspA.family.	0.843085	0.221023	12	12	0.00340427	0.0215025
K07386..putative.endopeptidase	-4.03707	0.773008	12	8	0.00340269	0.0215025
K00673..arginine.N.succinyltransferase..EC.2.3.1.109.	2.41623	0.463089	12	12	0.00341661	0.0215438
K01834..2.3.bisphosphoglycerate.dependent.phosphoglycerate.mutase..EC.5.4.2.11.	-0.915917	0.175654	12	12	0.003426	0.0215664
K03637..cyclic.pyranopterin.phosphate.synthase..EC.4.1.99.18.	1.81792	0.349049	12	12	0.00344341	0.0216028
K05541..tRNA.dihydrouridine.synthase.C	1.40521	0.269728	12	12	0.00343906	0.0216028
K03327..multidrug.resistance.protein..MATE.family	1.46426	0.28174	12	12	0.00347507	0.021728
K15777..4.5.DOPA.dioxygenase.extradiol..EC.1.13.11...	1.6182	0.311342	12	12	0.00347427	0.021728
K01525..bis.5..nucleosyl..tetraphosphatase..symmetrical...EC.3.6.1.41.	1.64579	0.316859	12	12	0.00348416	0.0217362
K09001..anhydro.N.acetylmuramic.acid.kinase	1.8825	0.362526	12	10	0.0034881	0.0217362
K02783..PTS.system..glucitol.sorbitol.specific.IIC.component	1.3876	0.267706	12	12	0.00351563	0.0218711
K00640..serine.O.acetyltransferase..EC.2.3.1.30.	1.0681	0.206257	12	12	0.00352977	0.0219223
K12132..serine.threonine.protein.kinase.WNK1	-2.23559	0.589684	12	12	0.00353658	0.021928
K10804..acyl.CoA.thioesterase.I..EC.3.1.2...3.1.1.5.	1.69238	0.327522	12	12	0.00356314	0.0220191
K19337..NO_NAME	1.70084	0.329064	12	12	0.00355869	0.0220191
K00169..pyruvate.ferredoxin.oxidoreductase.alpha.subunit..EC.1.2.7.1.	-1.97295	0.521356	12	6	0.00357681	0.0220303
K02417..flagellar.motor.switch.protein.FliN.FliY	1.3656	0.264437	12	12	0.00357224	0.0220303
K00113..glycerol.3.phosphate.dehydrogenase.subunit.C..EC.1.1.5.3.	2.70192	0.524023	12	9	0.00359647	0.0220739
K04775..protease.YdgD	1.09732	0.213118	12	11	0.00361831	0.0220739
K06078..murein.lipoprotein.lipoprotein	1.00768	0.266889	12	12	0.00362781	0.0220739
K06192..paraquat.inducible.protein.B	1.4908	0.289523	12	11	0.00361744	0.0220739
K08349..formate.dehydrogenase.N..beta.subunit	1.70965	0.331446	12	12	0.00359025	0.0220739
K08350..formate.dehydrogenase.N..gamma.subunit	1.64765	0.31968	12	12	0.00360263	0.0220739
K08722..5..deoxynucleotidase..EC.3.1.3.89.	2.20014	0.427396	12	11	0.00362161	0.0220739
K21602..NO_NAME	2.87543	0.558927	12	11	0.00363144	0.0220739
K00990...protein.PII..uridylyltransferase..EC.2.7.7.59.	2.48216	0.4831	12	10	0.00365149	0.0220777
K03303..lactate.transporter..LctP.family	-2.24519	0.487096	12	6	0.00365583	0.0220777
K03484..LacI.family.transcriptional.regulator..sucrose.operon.repressor	-2.25612	0.597826	12	11	0.00363833	0.0220777
K07154..NO_NAME	-2.25455	0.438616	12	11	0.00364491	0.0220777
K06162..alpha.D.ribose.1.methylphosphonate.5.triphosphate.diphosphatase..EC.3.6.1.63.	2.49488	0.48628	12	11	0.00367437	0.0221536
K00690..sucrose.phosphorylase..EC.2.4.1.7.	-2.11732	0.562599	12	12	0.00370109	0.0221875
K01223..6.phospho.beta.glucosidase..EC.3.2.1.86.	1.56535	0.305896	12	12	0.00371574	0.0221875
K03072..preprotein.translocase.subunit.SecD	2.51054	0.490345	12	12	0.00370727	0.0221875
K03611..disulfide.bond.formation.protein.DsbB	1.72738	0.337688	12	12	0.00372181	0.0221875
K03666..host.factor.I.protein	1.35436	0.359864	12	12	0.00370065	0.0221875
K10004..glutamate.aspartate.transport.system.ATP.binding.protein..EC.3.6.3...	1.67281	0.326951	12	12	0.00371839	0.0221875
K13894..microcin.C.transport.system.permease.protein	2.1558	0.420762	12	12	0.00369604	0.0221875
K01639..N.acetylneuraminate.lyase..EC.4.1.3.3.	1.38549	0.271269	12	12	0.00374663	0.0222284
K01788..N.acylglucosamine.6.phosphate.2.epimerase..EC.5.1.3.9.	1.86555	0.365138	12	11	0.00374116	0.0222284
K03758..arginine.ornithine.antiporter	0.890239	0.174195	12	11	0.00373659	0.0222284
K01246..DNA.3.methyladenine.glycosylase.I..EC.3.2.2.20.	1.09803	0.215715	12	12	0.00380149	0.0222455
K02000..glycine.betaine.proline.transport.system.ATP.binding.protein..EC.3.6.3.32.	2.60905	0.512694	12	10	0.00380569	0.0222455
K02044..phosphonate.transport.system.substrate.binding.protein	1.49839	0.294824	12	12	0.00382691	0.0222455
K02419..flagellar.biosynthetic.protein.FliP	1.14962	0.226289	12	10	0.00383337	0.0222455
K02855..AraC.family.transcriptional.regulator..L.rhamnose.operon.regulatory	1.47056	0.289398	12	11	0.00382971	0.0222455
K03181..chorismate..pyruvate.lyase..EC.4.1.3.40.	1.3901	0.27357	12	12	0.00383012	0.0222455
K05368..aquacobalamin.reductase...NAD.P.H.flavin.reductase..EC.1.16.1.3.1.5.1.41.	2.39895	0.472032	12	11	0.00382737	0.0222455
K07789..multidrug.efflux.pump	2.16957	0.426861	12	10	0.00382595	0.0222455
K09131..hypothetical.protein	1.42135	0.278575	12	12	0.00376309	0.0222455
K11071..spermidine.putrescine.transport.system.permease.protein	1.03928	0.276803	12	12	0.00375556	0.0222455
K14055..NO_NAME	1.65087	0.323877	12	9	0.00377901	0.0222455
K15984..NO_NAME	2.60483	0.512236	12	11	0.00381756	0.0222455
K18979..NO_NAME	1.53589	0.302178	12	12	0.00382554	0.0222455
K19227..cationic.peptide.transport.system.permease.protein	1.65664	0.325968	12	12	0.00382726	0.0222455
K04485..DNA.repair.protein.RadA.Sms	1.33841	0.264088	12	12	0.00387351	0.0224434
K00343..NADH.quinone.oxidoreductase.subunit.N..EC.1.6.5.3.	1.47278	0.290973	12	12	0.00389478	0.0225315
K03427..type.I.restriction.enzyme.M.protein	-3.61194	0.714429	12	11	0.00391428	0.0225712
K04691..serine.protease.DegS	1.61397	0.319344	12	12	0.00391987	0.0225712
K06891..ATP.dependent.Clp.protease.adaptor.protein.ClpS	1.65703	0.327804	12	12	0.00391677	0.0225712
K06181..ribosomal.large.subunit.pseudouridine.synthase.E	1.00641	0.199394	12	12	0.00394224	0.0225845
K07114..NO_NAME	-3.08586	0.611667	12	11	0.00394036	0.0225845
K09921..hypothetical.protein	1.51896	0.30075	12	10	0.00393134	0.0225845
K19226..cationic.peptide.transport.system.substrate.binding.protein	1.97291	0.39098	12	12	0.00394652	0.0225845
K00246..fumarate.reductase.subunit.C	1.69101	0.335656	12	12	0.00397476	0.0227112
K09251..putrescine.aminotransferase..EC.2.6.1.82.	2.14661	0.426345	12	11	0.00398412	0.0227297
K03669..membrane.glycosyltransferase	2.66384	0.529526	12	12	0.00399875	0.0227433
K03736..ethanolamine.ammonia.lyase.small.subunit..EC.4.3.1.7.	1.72996	0.343849	12	12	0.00399693	0.0227433
K00381..sulfite.reductase..NADPH..hemoprotein.beta.component..EC.1.8.1.2.	2.26929	0.451966	12	12	0.0040319	0.022827
K02019..molybdate.transport.system.regulatory.protein	1.46771	0.292212	12	12	0.00402563	0.022827
K04082..molecular.chaperone.HscB	1.85618	0.369632	12	12	0.00402927	0.022827
K03435..LacI.family.transcriptional.regulator..fructose.operon	2.24915	0.448284	12	12	0.0040446	0.022864
K03744..LemA.protein	-3.59986	0.719534	12	11	0.00409405	0.0231083
K02856..L.rhamnose.H..transport.protein	1.85346	0.370961	12	11	0.00411748	0.0232053
K00970..poly.A..polymerase..EC.2.7.7.19.	2.10443	0.423948	12	11	0.00423393	0.0232807
K01209..alpha.N.arabinofuranosidase..EC.3.2.1.55.	-2.90656	0.586049	12	12	0.0042497	0.0232807
K01250..pyrimidine.specific.ribonucleoside.hydrolase	1.62995	0.328098	12	12	0.00421944	0.0232807
K01608..tartronate.semialdehyde.synthase..EC.4.1.1.47.	1.7958	0.3624	12	12	0.00426537	0.0232807
K03284..metal.ion.transporter..MIT.family	1.43685	0.290215	12	12	0.0042813	0.0232807
K03531..cell.division.protein.FtsZ	1.34541	0.271532	12	12	0.00426696	0.0232807
K03598..sigma.E.factor.negative.regulatory.protein.RseB	1.29728	0.260974	12	12	0.00420841	0.0232807
K03607..ProP.effector	1.52465	0.306633	12	12	0.00420369	0.0232807
K03720..TrpR.family.transcriptional.regulator..trp.operon.repressor	1.00115	0.200976	12	11	0.00417049	0.0232807
K04017..formate.dependent.nitrite.reductase.complex.NrfF.subunit	1.89313	0.381547	12	11	0.00424183	0.0232807
K05396..D.cysteine.desulfhydrase..EC.4.4.1.15.	2.17952	0.436806	12	12	0.00414122	0.0232807
K05803..lipoprotein.NlpI	2.17592	0.437567	12	12	0.00420173	0.0232807
K06131..cardiolipin.synthase.A.B..EC.2.7.8...	1.03972	0.209924	12	12	0.00427447	0.0232807
K06179..ribosomal.large.subunit.pseudouridine.synthase.C	1.65242	0.331878	12	12	0.00417926	0.0232807
K07300..Ca2..H..antiporter	2.07332	0.418008	12	10	0.00424812	0.0232807
K07771..two.component.system..OmpR.family..response.regulator.BasR	1.67795	0.33787	12	11	0.00422538	0.0232807
K10001..glutamate.aspartate.transport.system.substrate.binding.protein	1.66354	0.335987	12	12	0.00428044	0.0232807
K10539..L.arabinose.transport.system.ATP.binding.protein..EC.3.6.3.17.	2.37128	0.478255	12	12	0.0042548	0.0232807
K10973..IclR.family.transcriptional.regulator..negative.regulator.of	1.73125	0.348779	12	12	0.0042345	0.0232807
K13637..NO_NAME	1.29198	0.259201	12	12	0.00415973	0.0232807
K13771..Rrf2.family.transcriptional.regulator..nitric.oxide.sensitive.transcriptional.repressor	2.20262	0.444175	12	12	0.00425219	0.0232807
K14393..NO_NAME	2.70494	0.546133	12	10	0.00427427	0.0232807
K14682..amino.acid.N.acetyltransferase..EC.2.3.1.1.	1.73545	0.34896	12	9	0.00420014	0.0232807
K15396..NO_NAME	1.92675	0.38831	12	12	0.00424129	0.0232807
K00677..UDP.N.acetylglucosamine.acyltransferase..EC.2.3.1.129.	1.05381	0.213633	12	12	0.00434905	0.0233416
K02790..PTS.system..maltose.glucose.specific.IIB.component..EC.2.7.1.199.2.7.1.208.	1.50989	0.305922	12	12	0.00433877	0.0233416
K02791..PTS.system..maltose.glucose.specific.IIC.component	1.50989	0.305922	12	12	0.00433877	0.0233416
K03633..chromosome.partition.protein.MukF	1.809	0.366525	12	11	0.00433873	0.0233416
K06075..MarR.family.transcriptional.regulator..transcriptional.regulator.for	1.32434	0.268265	12	11	0.00433443	0.0233416
K07320..putative.adenine.specific.DNA.methyltransferase	1.32541	0.268628	12	10	0.00434449	0.0233416
K10543..D.xylose.transport.system.substrate.binding.protein	1.90987	0.386128	12	11	0.00429895	0.0233416
K11106..L.tartrate.succinate.antiporter	2.26102	0.458057	12	12	0.00433658	0.0233416
K19235..NO_NAME	1.33213	0.269668	12	11	0.0043225	0.0233416
K00390..phosphoadenosine.phosphosulfate.reductase..EC.1.8.4.8.1.8.4.10.	1.79652	0.364815	12	11	0.00438059	0.0234686
K01735..3.dehydroquinate.synthase..EC.4.2.3.4.	0.981338	0.19933	12	12	0.00438536	0.0234686
K08299..carnitinyl.CoA.dehydratase	2.23037	0.453408	12	12	0.00440084	0.0235176
K02858..3.4.dihydroxy.2.butanone.4.phosphate.synthase..EC.4.1.99.12.	1.8129	0.369432	12	9	0.00444631	0.0236246
K04033..AraC.family.transcriptional.regulator..ethanolamine.operon	2.05418	0.418293	12	12	0.00443249	0.0236246
K07479..putative.DNA.topoisomerase	2.25198	0.45862	12	11	0.00443452	0.0236246
K07689..two.component.system..NarL.family..invasion.response.regulator.UvrY	1.98763	0.404961	12	12	0.0044427	0.0236246
K00956..sulfate.adenylyltransferase.subunit.1..EC.2.7.7.4.	0.918909	0.187497	12	12	0.00447086	0.0236535
K07180..serine.protein.kinase	2.46969	0.503661	12	12	0.00446094	0.0236535
K09801..hypothetical.protein	1.79415	0.366042	12	12	0.00446871	0.0236535
K03919..alkylated.DNA.repair.protein	2.04018	0.416675	12	9	0.00448869	0.0237141
K03576..LysR.family.transcriptional.regulator..regulator.for.metE.and.metH	1.73425	0.355015	12	12	0.00453322	0.0238954
K06190..intracellular.septation.protein	1.28722	0.263542	12	10	0.00453588	0.0238954
K03784..purine.nucleoside.phosphorylase..EC.2.4.2.1.	1.88512	0.386247	12	12	0.00455064	0.0239392
K01591..orotidine.5..phosphate.decarboxylase..EC.4.1.1.23.	-1.58468	0.436544	12	12	0.00461216	0.0240451
K02472..UDP.N.acetyl.D.mannosaminuronic.acid.dehydrogenase..EC.1.1.1.336.	1.37839	0.283515	12	12	0.00462591	0.0240451
K04078..chaperonin.GroES	-1.20955	0.248436	12	12	0.00459823	0.0240451
K06182..ribosomal.large.subunit.pseudouridine.synthase.F	2.11695	0.435465	12	12	0.0046277	0.0240451
K08177..MFS.transporter..OFA.family..oxalate.formate.antiporter	1.24556	0.255777	12	10	0.00459395	0.0240451
K12510..tight.adherence.protein.B	-2.86571	0.589516	12	11	0.00462858	0.0240451
K18326..MFS.transporter..DHA2.family..multidrug.resistance.protein	2.22989	0.458313	12	11	0.00461118	0.0240451
K19789..NO_NAME	1.4559	0.298863	12	12	0.00458701	0.0240451
K22130..NO_NAME	0.845084	0.173849	12	8	0.00462904	0.0240451
K03711..Fur.family.transcriptional.regulator..ferric.uptake.regulator	-3.82153	0.78655	12	6	0.00463883	0.0240623
K03596..GTP.binding.protein.LepA	-0.713601	0.147083	12	12	0.00466697	0.0241452
K06899..NO_NAME	1.80481	0.372013	12	11	0.00466781	0.0241452
K02117..V.A.type.H..Na..transporting.ATPase.subunit.A..EC.3.6.3.14.3.6.3.15.	-4.80395	0.99055	12	6	0.00467471	0.0241473
K02168..high.affinity.choline.transport.protein	2.43077	0.501597	12	11	0.00468992	0.0241586
K02520..translation.initiation.factor.IF.3	-1.26269	0.348805	12	12	0.00468937	0.0241586
K08996..putative.membrane.protein	1.29272	0.267492	12	12	0.00474501	0.0243411
K16074..NO_NAME	1.41162	0.29198	12	12	0.0047371	0.0243411
K18765..NO_NAME	1.21176	0.250694	12	10	0.00474128	0.0243411
K00566..tRNA.specific.2.thiouridylase..EC.2.8.1...	-0.936718	0.194252	12	12	0.0047893	0.0245344
K00820..glucosamine..fructose.6.phosphate.aminotransferase..isomerizing...EC.2.6.1.16.	-0.881586	0.182896	12	12	0.00479783	0.0245443
K00674..2.3.4.5.tetrahydropyridine.2.carboxylate.N.succinyltransferase..EC.2.3.1.117.	0.888123	0.184542	12	12	0.0048299	0.0245666
K01753..D.serine.dehydratase..EC.4.3.1.18.	1.95632	0.406506	12	12	0.00483004	0.0245666
K02523..octaprenyl.diphosphate.synthase..EC.2.5.1.90.	2.19739	0.456714	12	12	0.00483526	0.0245666
K03705..heat.inducible.transcriptional.repressor	-1.96762	0.546201	12	11	0.00482886	0.0245666
K21029..NO_NAME	1.73553	0.360487	12	12	0.0048221	0.0245666
K03402..transcriptional.regulator.of.arginine.metabolism	-1.62995	0.338975	12	12	0.0048473	0.0245941
K01496..phosphoribosyl.AMP.cyclohydrolase..EC.3.5.4.19.	-2.31083	0.48109	12	11	0.00486934	0.0246051
K02793..PTS.system..mannose.specific.IIA.component..EC.2.7.1.191.	1.67602	0.348801	12	12	0.00486176	0.0246051
K08289..phosphoribosylglycinamide.formyltransferase.2..EC.2.1.2.2.	-1.4847	0.309074	12	12	0.00486768	0.0246051
K00906..isocitrate.dehydrogenase.kinase.phosphatase	2.18255	0.454898	12	10	0.00489277	0.0246554
K07799..membrane.fusion.protein..multidrug.efflux.system	1.26555	0.263939	12	9	0.00490585	0.0246554
K12371..dipeptide.transport.system.ATP.binding.protein	2.17622	0.453755	12	11	0.00490083	0.0246554
K13953..alcohol.dehydrogenase..propanol.preferring..EC.1.1.1.1.	1.15074	0.239772	12	11	0.00488656	0.0246554
K06211..HTH.type.transcriptional.regulator..transcriptional.repressor.of.NAD.biosynthesis.genes..EC.2.7.7.1.2.7.1.22.	1.70986	0.356853	12	12	0.00492037	0.0246616
K08161..MFS.transporter..DHA1.family..multidrug.resistance.protein	1.81276	0.378228	12	12	0.00491488	0.0246616
K00631..glycerol.3.phosphate.O.acyltransferase..EC.2.3.1.15.	2.05309	0.429673	12	12	0.00497825	0.0248367
K01270..dipeptidase.D..EC.3.4.13...	1.70346	0.356793	12	12	0.00499543	0.0248367
K02003..NO_NAME	-1.24672	0.260963	12	12	0.00498214	0.0248367
K03292..glycoside.pentoside.hexuronide.cation.symporter..GPH.family	1.34958	0.282363	12	12	0.00497235	0.0248367
K04784..yersiniabactin.nonribosomal.peptide.synthetase	2.16401	0.453249	12	9	0.00499516	0.0248367
K08279..carnitine.operon.protein.CaiE	1.67134	0.349614	12	12	0.00496835	0.0248367
K00557..tRNA..uracil.5...methyltransferase	1.61425	0.338607	12	12	0.00502673	0.0248932
K01953..asparagine.synthase..glutamine.hydrolysing...EC.6.3.5.4.	1.56529	0.32834	12	12	0.00502691	0.0248932
K03571..rod.shape.determining.protein.MreD	1.87027	0.392231	12	12	0.00502247	0.0248932
K01708..galactarate.dehydratase..EC.4.2.1.42.	2.17128	0.455761	12	12	0.00504116	0.0248975
K07224..putative.lipoprotein	1.65461	0.347286	12	11	0.00503979	0.0248975
K04022..alcohol.dehydrogenase	1.49134	0.313252	12	12	0.00505568	0.024936
K13891..glutathione.transport.system.permease.protein	1.60359	0.337026	12	12	0.00506815	0.0249643
K07642..two.component.system..OmpR.family..sensor.histidine.kinase.BaeS..EC.2.7.13.3.	1.40608	0.295612	12	12	0.00507507	0.0249653
K00014..shikimate.dehydrogenase..EC.1.1.1.25.	-1.72754	0.486448	12	12	0.0052565	0.024999
K00287..dihydrofolate.reductase..EC.1.5.1.3.	-2.33104	0.657054	12	12	0.00528829	0.024999
K00626..acetyl.CoA.C.acetyltransferase..EC.2.3.1.9.	1.41279	0.298937	12	12	0.00521446	0.024999
K00627..pyruvate.dehydrogenase.E2.component..dihydrolipoamide.acetyltransferase...EC.2.3.1.12.	2.03328	0.430977	12	12	0.00525277	0.024999
K01197..hyaluronoglucosaminidase..EC.3.2.1.35.	-1.57669	0.367449	12	5	0.005143	0.024999
K01679..fumarate.hydratase..class.II..EC.4.2.1.2.	1.62957	0.344273	12	11	0.00518052	0.024999
K01716..3.hydroxyacyl..acyl.carrier.protein..dehydratase...trans.2.decenoyl..acyl.carrier.protein..isomerase..EC.4.2.1.59.5.3.3.14.	1.94045	0.54379	12	12	0.00510943	0.024999
K01867..tryptophanyl.tRNA.synthetase..EC.6.1.1.2.	1.45613	0.309026	12	12	0.00528019	0.024999
K01894..glutamyl.Q.tRNA.Asp..synthetase	1.30709	0.277108	12	10	0.00525715	0.024999
K02505..protein.transport.protein.HofC	1.59334	0.338125	12	8	0.00527878	0.024999
K02566..NagD.protein	1.29909	0.274937	12	12	0.00521904	0.024999
K02778..PTS.system..glucose.specific.IIB.component..EC.2.7.1.199.	1.48108	0.314309	12	12	0.0052793	0.024999
K02779..PTS.system..glucose.specific.IIC.component	1.4303	0.303252	12	12	0.00525889	0.024999
K02798..PTS.system..mannitol.specific.IIA.component..EC.2.7.1.197.	1.66248	0.350965	12	12	0.00516431	0.024999
K03273..D.glycero.D.manno.heptose.1.7.bisphosphate.phosphatase..EC.3.1.3.82.3.1.3.83.	1.37873	0.290141	12	11	0.0050958	0.024999
K03855..ferredoxin.like.protein	1.99279	0.419345	12	11	0.0050948	0.024999
K04015..formate.dependent.nitrate.reductase.complex..transmembrane.protein	1.13162	0.238477	12	10	0.00512627	0.024999
K05517..nucleoside.specific.channel.forming.protein	1.72493	0.365254	12	12	0.00523076	0.024999
K07724..Ner.family.transcriptional.regulator	1.15371	0.244961	12	11	0.00529058	0.024999
K08997..hypothetical.protein	1.65411	0.350876	12	11	0.00526973	0.024999
K09118..hypothetical.protein	-2.13511	0.598555	12	12	0.00512033	0.024999
K09158..hypothetical.protein	1.52205	0.427694	12	12	0.00519227	0.024999
K09971..general.L.amino.acid.transport.system.permease.protein	1.83284	0.387583	12	12	0.00520123	0.024999
K12152..phosphatase.NudJ	1.71333	0.360905	12	10	0.00511662	0.024999
K12265..nitric.oxide.reductase.FlRd.NAD....reductase..EC.1.18.1...	2.22973	0.472974	12	12	0.00526948	0.024999
K13643..NO_NAME	1.83696	0.387951	12	12	0.00517293	0.024999
K16088..NO_NAME	1.07962	0.22816	12	10	0.00518758	0.024999
K16787..energy.coupling.factor.transport.system.ATP.binding.protein..EC.3.6.3...	-2.01861	0.426302	12	12	0.00517227	0.024999
K17723..dihydropyrimidine.dehydrogenase..NAD...subunit.PreA..EC.1.3.1.1.	1.66376	0.351217	12	12	0.00516322	0.024999
K21698..NO_NAME	1.82323	0.386227	12	12	0.00523972	0.024999
K21903..NO_NAME	-4.33792	0.915318	12	8	0.00515352	0.024999
K00094..galactitol.1.phosphate.5.dehydrogenase..EC.1.1.1.251.	1.20571	0.256239	12	10	0.00531131	0.0250035
K03151..thiamine.biosynthesis.protein.ThiI	1.36625	0.290318	12	12	0.00530828	0.0250035
K03804..chromosome.partition.protein.MukE	2.21575	0.47101	12	12	0.00531685	0.0250035
K07091..lipopolysaccharide.export.system.permease.protein	1.44934	0.308113	12	12	0.00531845	0.0250035
K19222..1.4.dihydroxy.2.naphthoyl.CoA.hydrolase..EC.3.1.2.28.	1.53381	0.326572	12	11	0.00535288	0.0251335
K00334..NADH.quinone.oxidoreductase.subunit.E..EC.1.6.5.3.	1.81405	0.386698	12	10	0.00537972	0.0251421
K00703..starch.synthase..EC.2.4.1.21.	1.53484	0.32719	12	12	0.0053803	0.0251421
K00855..phosphoribulokinase..EC.2.7.1.19.	2.26154	0.482039	12	12	0.00537732	0.0251421
K07340..hypothetical.protein	1.03604	0.220871	12	10	0.0053818	0.0251421
K01118..FMN.dependent.NADH.azoreductase	1.46051	0.311542	12	11	0.00539471	0.0251708
K02167..TetR.AcrR.family.transcriptional.regulator..transcriptional	1.08064	0.231279	12	10	0.00547059	0.0254928
K00278..L.aspartate.oxidase..EC.1.4.3.16.	2.01099	0.430657	12	12	0.00548455	0.0255258
K01265..methionyl.aminopeptidase	-2.42593	0.519894	12	12	0.00550135	0.0255549
K16137..NO_NAME	1.64089	0.351704	12	11	0.00550455	0.0255549
K06221..2.5.diketo.D.gluconate.reductase.A	1.5709	0.336937	12	12	0.0055207	0.0255978
K06881..bifunctional.oligoribonuclease.and.PAP.phosphatase.NrnA..EC.3.1.3.7.3.1.13.3.	-1.25436	0.296998	12	5	0.00553753	0.0256439
K01876..aspartyl.tRNA.synthetase..EC.6.1.1.12.	-1.23715	0.265752	12	12	0.00555569	0.025664
K07662..two.component.system..OmpR.family..response.regulator.CpxR	2.13922	0.459499	12	11	0.0055543	0.025664
K02116..ATP.synthase.protein.I	1.39192	0.395739	12	12	0.00556377	0.0256694
K01643..citrate.lyase.subunit.alpha...citrate.CoA.transferase..EC.2.8.3.10.	1.14422	0.246037	12	10	0.00557902	0.0257078
K11102..proton.glutamate.symport.protein	2.557	0.550244	12	11	0.00559706	0.025759
K11742..spermidine.export.protein.MdtI	1.77834	0.38281	12	11	0.00560484	0.0257628
K00432..glutathione.peroxidase..EC.1.11.1.9.	1.81257	0.390705	12	11	0.00563662	0.025829
K03747..Smg.protein	1.00623	0.216843	12	11	0.00563081	0.025829
K19228..cationic.peptide.transport.system.permease.protein	2.06866	0.445971	12	12	0.00564009	0.025829
K15257..NO_NAME	1.89235	0.408206	12	11	0.00565417	0.0258616
K02066..phospholipid.cholesterol.gamma.HCH.transport.system.permease.protein	1.34059	0.290103	12	12	0.00572977	0.0258885
K02339..DNA.polymerase.III.subunit.chi..EC.2.7.7.7.	1.3483	0.385117	12	12	0.00571672	0.0258885
K02357..elongation.factor.EF.Ts	-1.75683	0.379623	12	12	0.005695	0.0258885
K02553..regulator.of.ribonuclease.activity.A	1.80735	0.390996	12	11	0.00572281	0.0258885
K02931..large.subunit.ribosomal.protein.L5	-0.536922	0.116079	12	12	0.0057069	0.0258885
K02992..small.subunit.ribosomal.protein.S7	-0.565035	0.122196	12	12	0.00571471	0.0258885
K08681..5..phosphate.synthase.pdxT.subunit..EC.4.3.3.6.	-2.62362	0.56759	12	12	0.00572305	0.0258885
K19052..NO_NAME	-1.41996	0.338513	12	5	0.00571929	0.0258885
K19810..NO_NAME	1.45487	0.31431	12	12	0.00569006	0.0258885
K20444..NO_NAME	-3.17312	0.685876	12	6	0.00570244	0.0258885
K00989..ribonuclease.PH	1.63995	0.355448	12	12	0.00576793	0.0260293
K03270..3.deoxy.D.manno.octulosonate.8.phosphate.phosphatase..KDO.8.P.phosphatase...EC.3.1.3.45.	0.843588	0.183209	12	12	0.0058164	0.026058
K03645..negative.modulator.of.initiation.of.replication	0.958327	0.208112	12	10	0.00581463	0.026058
K08225..MFS.transporter..ENTS.family..enterobactin..siderophore..exporter	1.89805	0.412168	12	12	0.00581371	0.026058
K11746..glutathione.regulated.potassium.efflux.system.ancillary.protein.KefF	1.98512	0.430941	12	12	0.00580611	0.026058
K18369..alcohol.dehydrogenase..EC.1.1.1...	-2.6272	0.570094	12	6	0.00579616	0.026058
K18922..NO_NAME	1.44254	0.344741	12	5	0.00578427	0.026058
K01058..phospholipase.A1..EC.3.1.1.32.3.1.1.4.	1.73055	0.376443	12	12	0.00585568	0.0262024
K06149..universal.stress.protein.A	1.95229	0.42483	12	12	0.00586448	0.0262102
K00651..homoserine.O.succinyltransferase..EC.2.3.1.46.	-1.41582	0.308275	12	12	0.00587903	0.0262201
K19234..NO_NAME	0.964466	0.210014	12	10	0.00588082	0.0262201
K00003..homoserine.dehydrogenase..EC.1.1.1.3.	-3.24662	0.708218	12	8	0.00592475	0.0262271
K00639..glycine.C.acetyltransferase..EC.2.3.1.29.	1.74357	0.379939	12	12	0.00589855	0.0262271
K00832..aromatic.amino.acid.transaminase..EC.2.6.1.57.	1.90078	0.414574	12	10	0.00592101	0.0262271
K03294..basic.amino.acid.polyamine.antiporter..APA.family	-2.73907	0.597299	12	12	0.00591639	0.0262271
K07816..putative.GTP.pyrophosphokinase..EC.2.7.6.5.	-3.55786	0.775801	12	6	0.00591487	0.0262271
K11929..outer.membrane.pore.protein.E	1.52171	0.331928	12	12	0.00592341	0.0262271
K20542..NO_NAME	1.04364	0.227827	12	10	0.00594299	0.0262765
K11734..aromatic.amino.acid.transport.protein.AroP	1.93724	0.423255	12	12	0.00596375	0.0263369
K00116..malate.dehydrogenase..quinone...EC.1.1.5.4.	1.88177	0.41154	12	12	0.00598816	0.026382
K16785..energy.coupling.factor.transport.system.permease.protein	-2.25424	0.492988	12	12	0.00598771	0.026382
K01008..selenide..water.dikinase..EC.2.7.9.3.	0.981624	0.214881	12	11	0.00601165	0.0264541
K00657..diamine.N.acetyltransferase..EC.2.3.1.57.	-2.72035	0.784241	12	12	0.00603359	0.0264993
K02194..heme.exporter.protein.B	1.36542	0.299188	12	12	0.00603618	0.0264993
K01095..phosphatidylglycerophosphatase.A..EC.3.1.3.27.	1.08908	0.238706	12	12	0.00604355	0.0265003
K07278..outer.membrane.protein	2.04051	0.447391	12	10	0.00605184	0.0265054
K00247..fumarate.reductase.subunit.D	1.57911	0.34662	12	12	0.00608044	0.0265679
K18850..NO_NAME	2.03253	0.446121	12	9	0.00607901	0.0265679
K01682..aconitate.hydratase.2...2.methylisocitrate.dehydratase..EC.4.2.1.3.4.2.1.99.	2.00541	0.440814	12	12	0.00611623	0.0266616
K07444..putative.N6.adenine.specific.DNA.methylase	-2.61654	0.756059	12	6	0.00611497	0.0266616
K07250..4.aminobutyrate.aminotransferase....S..3.amino.2.methylpropionate.transaminase..EC.2.6.1.19.2.6.1.22.	2.09346	0.460307	12	12	0.00612385	0.0266635
UNMAPPED	-1.0773	0.237653	12	12	0.006208	0.0269332
K00757..uridine.phosphorylase..EC.2.4.2.3.	1.14461	0.252747	12	11	0.00623307	0.0269332
K01488..adenosine.deaminase..EC.3.5.4.4.	1.25393	0.276743	12	12	0.00621962	0.0269332
K03046..DNA.directed.RNA.polymerase.subunit.beta...EC.2.7.7.6.	-1.16726	0.258037	12	12	0.00626214	0.0269332
K03314..Na..H..antiporter..NhaB.family	2.52743	0.558794	12	11	0.00626556	0.0269332
K03839..flavodoxin.I	1.52386	0.336215	12	12	0.00621176	0.0269332
K04772..serine.protease.DegQ	1.31614	0.381347	12	12	0.00621267	0.0269332
K06915..NO_NAME	2.34854	0.519202	12	11	0.00626348	0.0269332
K09802..hypothetical.protein	1.80114	0.39811	12	10	0.00625849	0.0269332
K11925..SgrR.family.transcriptional.regulator	1.32665	0.293203	12	11	0.00625597	0.0269332
K18657..NO_NAME	1.0844	0.239538	12	11	0.00624243	0.0269332
K01507..inorganic.pyrophosphatase..EC.3.6.1.1.	1.60415	0.35497	12	11	0.00628799	0.0269984
K15549..NO_NAME	1.22632	0.271457	12	9	0.00629702	0.0270059
K19270..NO_NAME	1.33907	0.29656	12	11	0.00630979	0.0270295
K00526..ribonucleoside.diphosphate.reductase.beta.chain..EC.1.17.4.1.	1.00653	0.292579	12	12	0.0063293	0.0270818
K01772..ferrochelatase..EC.4.99.1.1.	1.57739	0.350131	12	12	0.00636921	0.0272149
K06219..S.adenosylmethionine.dependent.methyltransferase	1.32629	0.294459	12	12	0.00637507	0.0272149
K09998..arginine.transport.system.permease.protein	2.34698	0.521376	12	12	0.00639065	0.0272501
K07397..putative.redox.protein	3.09719	0.688477	12	10	0.0064077	0.0272915
K03472..D.erythrose.4.phosphate.dehydrogenase..EC.1.2.1.72.	2.29	0.509197	12	12	0.00641559	0.0272938
K08994..putative.membrane.protein	3.0919	0.688001	12	10	0.00643483	0.0273443
K02300..cytochrome.o.ubiquinol.oxidase.subunit.IV	1.60725	0.35789	12	11	0.00645333	0.0273916
K02416..flagellar.motor.switch.protein.FliM	2.37479	0.52909	12	11	0.0064681	0.027423
K02867..large.subunit.ribosomal.protein.L11	-1.00926	0.224981	12	12	0.00648276	0.0274465
K12370..dipeptide.transport.system.permease.protein	1.6591	0.369918	12	9	0.00648842	0.0274465
K07323..phospholipid.transport.system.substrate.binding.protein	1.38419	0.308805	12	11	0.00650418	0.0274818
K05799..GntR.family.transcriptional.regulator..transcriptional.repressor.for	1.54253	0.344332	12	12	0.00652004	0.0275175
K10014..histidine.transport.system.substrate.binding.protein	1.34433	0.300228	12	9	0.00653248	0.0275387
K01160..crossover.junction.endodeoxyribonuclease.RusA	0.613612	0.137141	12	9	0.00655317	0.0275545
K02823..dihydroorotate.dehydrogenase.electron.transfer.subunit	-1.7599	0.432046	12	5	0.00654967	0.0275545
K09910..hypothetical.protein	2.09511	0.468346	12	11	0.00655847	0.0275545
K11535..nucleoside.transport.protein	1.73626	0.388455	12	11	0.0065813	0.0276192
K22900..NO_NAME	1.22767	0.275211	12	12	0.00663523	0.027814
K15724..NO_NAME	2.0168	0.45245	12	12	0.00665577	0.0278687
K00370..nitrate.reductase...nitrite.oxidoreductase..alpha.subunit..EC.1.7.5.1.1.7.99.4.	3.11047	0.698816	12	11	0.00669581	0.0279605
K01951..GMP.synthase..glutamine.hydrolysing...EC.6.3.5.2.	-1.1406	0.256366	12	12	0.00670782	0.0279605
K02478..two.component.system..LytT.family..sensor.kinase	1.7112	0.384388	12	12	0.0066915	0.0279605
K13292..NO_NAME	1.7595	0.395368	12	12	0.0067005	0.0279605
K02841..heptosyltransferase.I..EC.2.4.....	1.04801	0.235772	12	10	0.00673341	0.0280358
K00857..thymidine.kinase..EC.2.7.1.21.	-1.43309	0.323034	12	12	0.00678787	0.0282308
K09824..hypothetical.protein	1.0622	0.239597	12	10	0.00680721	0.0282796
K03290..MFS.transporter..SHS.family..sialic.acid.transporter	1.9217	0.433877	12	12	0.00683357	0.0283574
K02682..prepilin.peptidase.dependent.protein.D	1.2059	0.272677	12	10	0.00687621	0.028439
K03838..threonine.transporter	1.6068	0.363284	12	12	0.0068729	0.028439
K08301..ribonuclease.G	1.18228	0.267231	12	12	0.0068652	0.028439
K13683..NO_NAME	0.86691	0.196126	12	9	0.00689084	0.0284678
K07480..insertion.element.IS1.protein.InsB	1.77085	0.40077	12	10	0.00690087	0.0284776
K05984..excinuclease.Cho	1.22576	0.27759	12	10	0.00691963	0.0285233
K09771..hypothetical.protein	1.48581	0.336585	12	10	0.00692822	0.028527
K02192..bacterioferritin.associated.ferredoxin	2.1234	0.481493	12	9	0.00695629	0.0285375
K02445..MFS.transporter..OPA.family..glycerol.3.phosphate.transporter	1.9234	0.43622	12	11	0.00696149	0.0285375
K03926..periplasmic.divalent.cation.tolerance.protein	1.59163	0.360746	12	12	0.00694321	0.0285375
K21964..NO_NAME	2.70706	0.613629	12	9	0.00694651	0.0285375
K10008..glutamate.transport.system.ATP.binding.protein..EC.3.6.3...	-3.01738	0.684929	12	11	0.0069866	0.0286088
K11933..NADH.oxidoreductase.Hcr	1.48838	0.338127	12	10	0.00700977	0.0286525
K12297..ribosomal.RNA.large.subunit.methyltransferase.L	1.78031	0.404488	12	12	0.00701269	0.0286525
K03969..phage.shock.protein.A	1.65222	0.375503	12	11	0.00702167	0.0286577
K02109..F.type.H..transporting.ATPase.subunit.b	-1.1238	0.255709	12	12	0.00705583	0.0287655
K00853..L.ribulokinase..EC.2.7.1.16.	2.13462	0.485913	12	12	0.00706797	0.0287834
K02477..two.component.system..LytT.family..response.regulator	1.50165	0.342103	12	12	0.00709135	0.0288154
K12112..evolved.beta.galactosidase.subunit.beta	1.25508	0.2859	12	7	0.00708844	0.0288154
K02412..flagellum.specific.ATP.synthase..EC.3.6.3.14.	1.54302	0.352191	12	12	0.00714661	0.0290051
K07772..two.component.system..OmpR.family..torCAD.operon.response.regulator.TorR	1.73275	0.395698	12	12	0.00716146	0.0290051
K18446..NO_NAME	1.32065	0.301573	12	9	0.00715991	0.0290051
K05590..ATP.dependent.RNA.helicase.SrmB	2.20538	0.504028	12	12	0.00718485	0.0290681
K01908..propionyl.CoA.synthetase..EC.6.2.1.17.	2.50342	0.572324	12	12	0.00719411	0.0290739
K00383..glutathione.reductase..NADPH...EC.1.8.1.7.	1.35901	0.310858	12	12	0.00720977	0.0290739
K13244..NO_NAME	1.22268	0.279643	12	9	0.00720643	0.0290739
K00948..ribose.phosphate.pyrophosphokinase..EC.2.7.6.1.	-0.664052	0.152065	12	12	0.00724311	0.0291767
K09704..hypothetical.protein	-2.9668	0.679736	12	7	0.00725861	0.0292075
K02967..small.subunit.ribosomal.protein.S2	-0.694356	0.159131	12	12	0.0072669	0.0292092
K01515..ADP.ribose.pyrophosphatase..EC.3.6.1.13.	0.941693	0.216395	12	12	0.00734723	0.0293361
K03425..sec.independent.protein.translocase.protein.TatE	2.46023	0.73369	12	11	0.00732533	0.0293361
K03807..AmpE.protein	1.30612	0.299885	12	10	0.00732187	0.0293361
K04755..ferredoxin..2Fe.2S	1.47929	0.340004	12	11	0.00735377	0.0293361
K06204..DnaK.suppressor.protein	1.93278	0.576556	12	12	0.00733693	0.0293361
K07258..D.alanyl.D.alanine.carboxypeptidase..penicillin.binding.protein.5.6...EC.3.4.16.4.	1.15699	0.265802	12	12	0.00733956	0.0293361
K11932..universal.stress.protein.G	1.64165	0.37674	12	12	0.00730778	0.0293361
K10003..glutamate.aspartate.transport.system.permease.protein	2.70535	0.622565	12	12	0.00739056	0.0294512
K03496..chromosome.partitioning.protein	-1.37818	0.31751	12	12	0.00742468	0.0295518
K06048..carboxylate.amine.ligase	1.84184	0.424443	12	10	0.0074329	0.0295518
K10538..L.arabinose.transport.system.permease.protein	2.45585	0.566065	12	12	0.00743966	0.0295518
K02045..sulfate.transport.system.ATP.binding.protein..EC.3.6.3.25.	1.98901	0.458645	12	12	0.007452	0.0295692
K01685..altronate.hydrolase..EC.4.2.1.7.	1.23717	0.285534	12	12	0.00747944	0.0295829
K03475..PTS.system..ascorbate.specific.IIC.component	1.48648	0.343162	12	12	0.00748733	0.0295829
K04020..phosphotransacetylase	1.49173	0.34428	12	10	0.00747889	0.0295829
K05365..penicillin.binding.protein.1B..EC.2.4.1.129.3.4.....	1.38634	0.319845	12	10	0.00746807	0.0295829
K01304..pyroglutamyl.peptidase	-2.15791	0.498514	12	12	0.007509	0.0296128
K03981..thiol.disulfide.interchange.protein.DsbC	1.59917	0.369557	12	11	0.00751882	0.0296128
K06205..MioC.protein	1.27426	0.294445	12	10	0.00751584	0.0296128
K08297..crotonobetainyl.CoA.dehydrogenase	1.40212	0.324172	12	12	0.00753315	0.0296378
K09767..hypothetical.protein	1.4102	0.326242	12	12	0.00755223	0.0296815
K01638..malate.synthase..EC.2.3.3.9.	1.16172	0.269069	12	10	0.00758817	0.0297597
K07054..NO_NAME	1.36175	0.315343	12	12	0.0075826	0.0297597
K01920..glutathione.synthase..EC.6.3.2.3.	1.7986	0.41745	12	12	0.00765329	0.0298175
K02027..multiple.sugar.transport.system.substrate.binding.protein	-1.65855	0.384896	12	12	0.00764918	0.0298175
K03589..cell.division.protein.FtsQ	0.30255	0.0701752	12	12	0.0076328	0.0298175
K04080..molecular.chaperone.IbpA	1.30976	0.303772	12	12	0.00763072	0.0298175
K07393..putative.glutathione.S.transferase	1.78514	0.414183	12	11	0.0076425	0.0298175
K08682..acyl.carrier.protein.phosphodiesterase..EC.3.1.4.14.	1.13319	0.262859	12	9	0.0076351	0.0298175
K13628..NO_NAME	2.10663	0.48905	12	11	0.00765998	0.0298175
K14392..NO_NAME	2.48996	0.57817	12	10	0.00766714	0.0298175
K22105..NO_NAME	2.16144	0.50235	12	12	0.00769607	0.0298987
K01673..carbonic.anhydrase..EC.4.2.1.1.	0.929859	0.216181	12	12	0.00770589	0.0299056
K05685..macrolide.transport.system.ATP.binding.permease.protein..EC.3.6.3...	2.01364	0.46876	12	11	0.00774722	0.0300033
K05804..right.origin.binding.protein	1.36362	0.317399	12	12	0.00774297	0.0300033
K00892..inosine.kinase..EC.2.7.1.73.	2.1479	0.500563	12	12	0.0077819	0.0301062
K02400..flagellar.biosynthesis.protein.FlhA	1.63268	0.380624	12	12	0.00779286	0.0301173
K05275..pyridoxine.4.dehydrogenase..EC.1.1.1.65.	1.70119	0.396779	12	9	0.00780754	0.0301341
K21065..NO_NAME	-2.02915	0.517812	12	5	0.00781343	0.0301341
K01792..glucose.6.phosphate.1.epimerase..EC.5.1.3.15.	3.37341	0.788	12	11	0.00785618	0.0302235
K03210..preprotein.translocase.subunit.YajC	0.790928	0.184782	12	12	0.00786104	0.0302235
K04044..molecular.chaperone.HscA	2.8004	0.653943	12	12	0.00784607	0.0302235
K07232..cation.transport.protein.ChaC	1.3354	0.312185	12	11	0.00788147	0.0302707
K13888..NO_NAME	0.913205	0.213563	12	10	0.00789317	0.0302843
K11191..PTS.system..N.acetylmuramic.acid.specific.IIB.component..EC.2.7.1.192.	1.58203	0.370636	12	9	0.00795085	0.0304114
K11192..PTS.system..N.acetylmuramic.acid.specific.IIC.component	1.58203	0.370636	12	9	0.00795085	0.0304114
K12972..glyoxylate.hydroxypyruvate.reductase.A..EC.1.1.1.79.1.1.1.81.	2.42887	0.568791	12	9	0.00793699	0.0304114
K05807..putative.lipoprotein	1.10576	0.259127	12	12	0.00795952	0.0304132
K07166..ACT.domain.containing.protein	-2.34077	0.548689	12	11	0.0079682	0.0304151
K00872..homoserine.kinase..EC.2.7.1.39.	1.30027	0.305333	12	12	0.00802621	0.0306051
K03413..two.component.system..chemotaxis.family..response.regulator.CheY	1.23351	0.290118	12	11	0.00807819	0.0307717
K01866..tyrosyl.tRNA.synthetase..EC.6.1.1.1.	-1.75074	0.412131	12	12	0.00810714	0.0308503
K03386..peroxiredoxin..alkyl.hydroperoxide.reductase.subunit.C...EC.1.11.1.15.	1.20566	0.283966	12	11	0.00812453	0.0308848
K02121..V.A.type.H..Na..transporting.ATPase.subunit.E	-2.86912	0.676548	12	6	0.00816354	0.0309114
K03389..heterodisulfide.reductase.subunit.B..EC.1.8.98.1.	-3.01376	0.711225	12	6	0.00818978	0.0309114
K03446..MFS.transporter..DHA2.family..multidrug.resistance.protein.B	2.31153	0.544781	12	11	0.00814583	0.0309114
K03824..putative.acetyltransferase	1.95454	0.461185	12	11	0.00818462	0.0309114
K03837..serine.transporter	1.40686	0.331842	12	10	0.00817324	0.0309114
K16140..NO_NAME	1.14235	0.269353	12	10	0.00816122	0.0309114
K17103..CDP.diacylglycerol...serine.O.phosphatidyltransferase..EC.2.7.8.8.	-2.62339	0.61869	12	7	0.00816776	0.0309114
K02572..ferredoxin.type.protein.NapF	1.5382	0.36356	12	10	0.00824073	0.0310092
K03616..electron.transport.complex.protein.RnfB	1.6028	0.37877	12	12	0.00823581	0.0310092
K17722..dihydropyrimidine.dehydrogenase..NAD...subunit.PreT..EC.1.3.1.1.	1.0449	0.246953	12	10	0.00823893	0.0310092
K03779..L....tartrate.dehydratase.alpha.subunit..EC.4.2.1.32.	1.57257	0.371815	12	10	0.0082528	0.0310232
K02283..pilus.assembly.protein.CpaF	-2.2162	0.524377	12	12	0.00827753	0.0310343
K02574..ferredoxin.type.protein.NapH	1.50481	0.356051	12	10	0.00827695	0.0310343
K04081..molecular.chaperone.IbpB	1.35329	0.320294	12	12	0.00828665	0.0310343
K05802..potassium.efflux.system.protein.KefA	1.06707	0.252571	12	10	0.00828919	0.0310343
K00351..Na..transporting.NADH.ubiquinone.oxidoreductase.subunit.F	-3.21981	0.762844	12	10	0.0083214	0.031119
K03546..exonuclease.SbcC	1.25886	0.298315	12	10	0.00832856	0.031119
K05838..putative.thioredoxin	1.20894	0.286832	12	10	0.00836936	0.03124
K15828..NO_NAME	1.21461	0.288536	12	10	0.00841188	0.0313672
K00932..propionate.kinase..EC.2.7.2.15.	1.31664	0.3129	12	12	0.00842556	0.0313688
K03557..Fis.family.transcriptional.regulator..factor.for.inversion	2.1936	0.521366	12	12	0.00842921	0.0313688
K01040..glutaconate.CoA.transferase..subunit.B..EC.2.8.3.12.	-1.95968	0.599755	12	7	0.00846639	0.0314757
K01588..5..carboxyamino.imidazole.ribonucleotide.mutase..EC.5.4.99.18.	0.607286	0.144793	12	12	0.0085374	0.0316446
K06940..NO_NAME	1.20295	0.286734	12	10	0.00852777	0.0316446
K12700..NO_NAME	1.09375	0.260727	12	11	0.0085305	0.0316446
K01874..methionyl.tRNA.synthetase..EC.6.1.1.10.	-1.42798	0.340914	12	12	0.00858258	0.0317803
K04774..serine.protease.SohB	1.30053	0.310699	12	10	0.00860635	0.0318366
K02573..ferredoxin.type.protein.NapG	1.92544	0.46011	12	11	0.00861544	0.0318386
K16148..starch.synthase..EC.2.4.1.21.	-2.5769	0.615982	12	11	0.00862661	0.0318481
K19804..NO_NAME	1.95844	0.468655	12	12	0.00866452	0.0319563
K05851..adenylate.cyclase..class.1..EC.4.6.1.1.	2.09784	0.502625	12	12	0.00870722	0.032082
K03184..2.octaprenyl.3.methyl.6.methoxy.1.4.benzoquinol.hydroxylase..EC.1.14.13...	1.43261	0.343375	12	9	0.00872088	0.0321004
K01584..arginine.decarboxylase..EC.4.1.1.19.	1.78316	0.427741	12	12	0.00874926	0.0321412
K04028..ethanolamine.utilization.protein.EutN	1.71881	0.412274	12	11	0.00874672	0.0321412
K02401..flagellar.biosynthetic.protein.FlhB	1.26134	0.302685	12	11	0.00876316	0.0321459
K02837..peptide.chain.release.factor.RF.3	2.34666	0.563207	12	12	0.00876784	0.0321459
K08169..MFS.transporter..DHA2.family..multidrug.resistance.protein	1.26392	0.303716	12	12	0.00881095	0.0322721
K03974..psp.operon.transcriptional.activator	1.16954	0.281339	12	9	0.00884943	0.0323811
K01414..oligopeptidase.A	1.80317	0.434751	12	12	0.00893087	0.0324569
K01621..xylulose.5.phosphate.fructose.6.phosphate.phosphoketolase..EC.4.1.2.9.4.1.2.22.	-1.42297	0.342738	12	11	0.00889464	0.0324569
K03717..LysR.family.transcriptional.regulator..transcriptional.activator.of	1.89674	0.457083	12	9	0.00891295	0.0324569
K03828..putative.acetyltransferase	1.88844	0.454956	12	10	0.00890302	0.0324569
K09768..hypothetical.protein	2.36272	0.569667	12	10	0.00893132	0.0324569
K10824..nickel.transport.system.ATP.binding.protein..EC.3.6.3.24.	1.28201	0.308901	12	10	0.0089082	0.0324569
K13895..microcin.C.transport.system.permease.protein	1.549	0.373429	12	12	0.00892695	0.0324569
K07308..anaerobic.dimethyl.sulfoxide.reductase.subunit.C..DMSO.reductase.anchor.subunit.	2.38118	0.574286	12	12	0.00894182	0.0324633
K02257..protoheme.IX.farnesyltransferase..EC.2.5.1...	1.50208	0.36268	12	12	0.00898307	0.0325812
K02048..sulfate.transport.system.substrate.binding.protein	2.06325	0.498545	12	12	0.00900985	0.0326464
K01023..arylsulfate.sulfotransferase	0.850621	0.205653	12	7	0.00903037	0.032681
K01752..L.serine.dehydratase..EC.4.3.1.17.	0.583028	0.141026	12	12	0.00904793	0.032681
K02933..large.subunit.ribosomal.protein.L6	-0.758914	0.183526	12	12	0.00903933	0.032681
K21645..NO_NAME	1.19855	0.289965	12	9	0.00905458	0.032681
K01990..ABC.2.type.transport.system.ATP.binding.protein	-0.906305	0.219453	12	12	0.00908639	0.0327004
K03684..ribonuclease.D	1.92795	0.466792	12	12	0.00908309	0.0327004
K07690..two.component.system..NarL.family..response.regulator.EvgA	0.816638	0.197689	12	8	0.00907683	0.0327004
K02852..UDP.N.acetyl.D.mannosaminuronic.acid.transferase	2.2628	0.548148	12	11	0.00910196	0.0327248
K03656..ATP.dependent.DNA.helicase.Rep	1.77003	0.428943	12	10	0.0091161	0.0327439
K02935..large.subunit.ribosomal.protein.L7.L12	-0.724965	0.17593	12	12	0.00916714	0.0328954
K01706..glucarate.dehydratase..EC.4.2.1.40.	3.41075	0.828412	12	11	0.00919884	0.0329773
K18702..NO_NAME	1.03703	0.252341	12	9	0.00926703	0.0331897
K07406..alpha.galactosidase..EC.3.2.1.22.	1.87151	0.455518	12	12	0.00927723	0.0331943
K01139..guanosine.3..5..bis.diphosphate..3..pyrophosphohydrolase..EC.3.1.7.2.	1.57876	0.384882	12	12	0.00933727	0.0332489
K03424..TatD.DNase.family.protein	0.402019	0.0979909	12	12	0.00933092	0.0332489
K05835..threonine.efflux.protein	1.18657	0.289236	12	12	0.00933257	0.0332489
K11258..acetolactate.synthase.II.small.subunit..EC.2.2.1.6.	2.26871	0.552864	12	12	0.00932236	0.0332489
K12973..lipid.IVA.palmitoyltransferase..EC.2.3.1.251.	1.90779	0.465092	12	11	0.00933681	0.0332489
K00982..glutamate.ammonia.ligase.adenylyltransferase	3.39777	0.829121	12	11	0.00937271	0.0332944
K01782..3.hydroxyacyl.CoA.dehydrogenase...enoyl.CoA.hydratase...3.hydroxybutyryl.CoA.epimerase..EC.1.1.1.35.4.2.1.17.5.1.2.3.	4.00267	0.977302	12	9	0.00939488	0.0332944
K01787..N.acylglucosamine.2.epimerase..EC.5.1.3.8.	-2.1087	0.560564	12	5	0.00937852	0.0332944
K03620..Ni.Fe.hydrogenase.1.B.type.cytochrome.subunit	1.314	0.32078	12	9	0.00938902	0.0332944
K13918..NO_NAME	2.58826	0.631408	12	11	0.00936226	0.0332944
K01092..myo.inositol.1.or.4..monophosphatase..EC.3.1.3.25.	0.816057	0.199365	12	12	0.00941657	0.0333395
K09023..aminoacrylate.hydrolase..EC.3.5.1...	1.23785	0.302654	12	10	0.00944705	0.0334156
K00128..aldehyde.dehydrogenase..NAD....EC.1.2.1.3.	-2.17012	0.531108	12	10	0.00948375	0.0334498
K04063..osmotically.inducible.protein.OsmC	1.35584	0.331772	12	12	0.00947793	0.0334498
K16263..NO_NAME	1.19598	0.29264	12	10	0.00947573	0.0334498
K04754..lipoprotein	1.3224	0.323757	12	12	0.0094974	0.0334662
K13288..oligoribonuclease..EC.3.1.....	1.57117	0.385203	12	12	0.009551	0.0336162
K18324..multidrug.efflux.pump	1.94136	0.47605	12	12	0.00955807	0.0336162
K06917..tRNA.2.selenouridine.synthase	1.24681	0.305911	12	10	0.00957976	0.0336606
K02193..heme.exporter.protein.A..EC.3.6.3.41.	1.64599	0.404054	12	10	0.00959916	0.0336638
K03610..septum.site.determining.protein.MinC	1.40568	0.345142	12	10	0.00960788	0.0336638
K09470..gamma.glutamylputrescine.synthase..EC.6.3.1.11.	2.17792	0.534523	12	6	0.00959126	0.0336638
K03533..TorA.specific.chaperone	1.28779	0.316549	12	10	0.00965087	0.0337826
K00919..4.diphosphocytidyl.2.C.methyl.D.erythritol.kinase..EC.2.7.1.148.	-0.865468	0.21304	12	12	0.00970555	0.0339279
K12529..putative.selenate.reductase.FAD.binding.subunit	1.34248	0.330502	12	10	0.00971065	0.0339279
K00783..hypothetical.protein	-1.05049	0.258793	12	12	0.00973678	0.0339421
K09020..ureidoacrylate.peracid.hydrolase..EC.3.5.1.110.	1.63742	0.403631	12	11	0.0097604	0.0339421
K11474..GntR.family.transcriptional.regulator..glc.operon.transcriptional	1.08603	0.267678	12	10	0.00975567	0.0339421
K15256..NO_NAME	1.58754	0.391046	12	12	0.00973178	0.0339421
K15725..NO_NAME	-1.52377	0.40861	12	5	0.00974453	0.0339421
K00943..dTMP.kinase..EC.2.7.4.9.	0.424003	0.104558	12	12	0.00977542	0.0339625
K01194..alpha.alpha.trehalase..EC.3.2.1.28.	2.54233	0.627946	12	12	0.0098386	0.0341071
K01839..phosphopentomutase..EC.5.4.2.7.	1.98398	0.490221	12	11	0.00985341	0.0341071
K08173..MFS.transporter..MHS.family..metabolite.H..symporter	1.18946	0.293787	12	9	0.00983792	0.0341071
K10118..raffinose.stachyose.melibiose.transport.system.permease.protein	-2.37398	0.586592	12	12	0.00985379	0.0341071
K06957..NO_NAME	1.77187	0.438171	12	8	0.00988585	0.0341863
K02939..large.subunit.ribosomal.protein.L9	-0.795678	0.196863	12	12	0.00990518	0.0342213
K04764..integration.host.factor.subunit.alpha	1.38062	0.435224	12	12	0.00995011	0.0343126
K18968..NO_NAME	0.919159	0.227642	12	10	0.00994488	0.0343126
K00563..rRNA..guanine.N1...methyltransferase	1.33488	0.330853	12	10	0.00997506	0.0343668
K02462..general.secretion.pathway.protein.M	1.8828	0.466766	12	9	0.00998444	0.0343672
K02034..peptide.nickel.transport.system.permease.protein	-1.6746	0.528467	12	12	0.0100081	0.0344167
K00609..aspartate.carbamoyltransferase.catalytic.subunit..EC.2.1.3.2.	-1.2998	0.322738	12	12	0.0100468	0.0344541
K07781..LuxR.family.transcriptional.regulator..capsular.biosynthesis.positive.transcription.factor	2.35977	0.58583	12	9	0.0100402	0.0344541
K21557..NO_NAME	-1.83858	0.496334	12	5	0.0100354	0.0344541
K09747..hypothetical.protein	1.58397	0.393424	12	11	0.0100597	0.0344667
K16212..NO_NAME	-2.5911	0.700304	12	5	0.010086	0.0345249
K09016..putative.pyrimidine.permease.RutG	0.75216	0.187042	12	9	0.0101074	0.0345612
K09862..hypothetical.protein	0.771775	0.191991	12	10	0.0101225	0.0345612
K16012..ATP.binding.cassette..subfamily.C..bacterial.CydC	2.22859	0.554427	12	11	0.0101246	0.0345612
K01916..NAD..synthase..EC.6.3.1.5.	1.92256	0.480052	12	10	0.0102733	0.0349918
K02430..DeoR.family.transcriptional.regulator..L.fucose.operon.activator	0.903714	0.225683	12	10	0.010279	0.0349918
K04753..suppressor.of.ftsI	1.89243	0.472547	12	12	0.0102748	0.0349918
K02782..PTS.system..glucitol.sorbitol.specific.IIB.component..EC.2.7.1.198.	1.72786	0.431768	12	12	0.0103048	0.0350475
K07146..NO_NAME	1.57081	0.393091	12	12	0.010364	0.0352167
K00364..GMP.reductase..EC.1.7.1.7.	1.94852	0.488012	12	11	0.0103977	0.0352991
K00868..pyridoxine.kinase..EC.2.7.1.35.	0.919831	0.230448	12	12	0.0104111	0.0353123
K17948..NO_NAME	1.83283	0.459298	12	6	0.0104213	0.0353144
K02961..small.subunit.ribosomal.protein.S17	-0.46093	0.115639	12	12	0.0104687	0.0354239
K06980..NO_NAME	1.26734	0.317984	12	9	0.0104727	0.0354239
K01255..leucyl.aminopeptidase..EC.3.4.11.1.	2.05782	0.516471	12	12	0.0104849	0.0354331
K01141..exodeoxyribonuclease.I..EC.3.1.11.1.	1.92323	0.483011	12	12	0.0105124	0.0354937
K09475..outer.membrane.pore.protein.C	1.83516	0.461543	12	11	0.0105712	0.0356597
K05774..ribose.1.5.bisphosphokinase..EC.2.7.4.23.	1.69864	0.427817	12	10	0.010631	0.0358289
K04565..superoxide.dismutase..Cu.Zn.family..EC.1.15.1.1.	1.19743	0.301909	12	10	0.0106767	0.0359351
K13890..glutathione.transport.system.permease.protein	1.75173	0.44172	12	12	0.0106818	0.0359351
K01048..lysophospholipase..EC.3.1.1.5.	0.973984	0.246158	12	10	0.0107778	0.0359719
K02504..protein.transport.protein.HofB	1.10068	0.277955	12	9	0.0107437	0.0359719
K03112..DamX.protein	1.54515	0.39044	12	9	0.0107701	0.0359719
K04336..curli.production.protein	0.929059	0.234566	12	8	0.0107347	0.0359719
K04760..transcription.elongation.factor.GreB	2.8008	0.706784	12	11	0.0107135	0.0359719
K06879..7.cyano.7.deazaguanine.reductase..EC.1.7.1.13.	2.0791	0.525429	12	8	0.0107756	0.0359719
K07347..outer.membrane.usher.protein	2.32718	0.588186	12	11	0.0107799	0.0359719
K10117..raffinose.stachyose.melibiose.transport.system.substrate.binding.protein	-1.87709	0.473845	12	12	0.0107278	0.0359719
K11733..lysine.specific.permease	1.7823	0.450429	12	12	0.0107762	0.0359719
K08306..membrane.bound.lytic.murein.transglycosylase.C	1.94314	0.491378	12	10	0.0108024	0.0360146
K02198..cytochrome.c.type.biogenesis.protein.CcmF	1.13577	0.28744	12	10	0.0108363	0.0360411
K03528..cell.division.protein.ZipA	1.14864	0.290784	12	10	0.0108492	0.0360411
K09780..hypothetical.protein	2.00047	0.506387	12	11	0.0108455	0.0360411
K15723..NO_NAME	1.30795	0.418837	12	12	0.0108219	0.0360411
K02020..molybdate.transport.system.substrate.binding.protein	2.06414	0.523299	12	11	0.0109109	0.0361814
K07306..anaerobic.dimethyl.sulfoxide.reductase.subunit.A..EC.1.8.5.3.	2.3669	0.599941	12	11	0.0109027	0.0361814
K15461..NO_NAME	1.33353	0.338322	12	8	0.0109423	0.036253
K22010..NO_NAME	-3.08159	0.782929	12	11	0.0110042	0.0364256
K07657..two.component.system..OmpR.family..phosphate.regulon.response.regulator.PhoB	1.58747	0.403491	12	10	0.0110223	0.036453
K03476..L.ascorbate.6.phosphate.lactonase..EC.3.1.1...	1.51017	0.38406	12	11	0.0110469	0.0365019
K00604..methionyl.tRNA.formyltransferase..EC.2.1.2.9.	-0.269607	0.0686816	12	12	0.0111209	0.0365446
K01150..deoxyribonuclease.I	1.96254	0.499511	12	12	0.0110822	0.0365446
K01816..hydroxypyruvate.isomerase..EC.5.3.1.22.	1.66616	0.424442	12	10	0.01112	0.0365446
K01868..threonyl.tRNA.synthetase..EC.6.1.1.3.	-1.21251	0.308561	12	12	0.0110753	0.0365446
K02200..cytochrome.c.type.biogenesis.protein.CcmH	1.59068	0.405294	12	10	0.0111287	0.0365446
K11073..putrescine.transport.system.substrate.binding.protein	1.5654	0.398551	12	12	0.0110954	0.0365446
K18778..NO_NAME	2.48338	0.632378	12	11	0.0111032	0.0365446
K00373..nitrate.reductase.delta.subunit	1.13214	0.288532	12	9	0.0111392	0.0365469
K01305..beta.aspartyl.peptidase	1.05641	0.269495	12	11	0.0111822	0.0366232
K03113..translation.initiation.factor.1	1.7124	0.436794	12	11	0.0111776	0.0366232
K15977..NO_NAME	0.854127	0.217986	12	12	0.0112016	0.0366544
K08311..putative..di.nucleoside.polyphosphate.hydrolase..EC.3.6.1...	1.61319	0.411883	12	12	0.01122	0.0366823
K03772..FKBP.type.peptidyl.prolyl.cis.trans.isomerase.FkpA	0.95861	0.245002	12	12	0.0112648	0.0367965
K02806..PTS.system..nitrogen.regulatory.IIA.component..EC.2.7.1...	2.13039	0.545042	12	11	0.0113101	0.0369118
K01421..putative.membrane.protein	-2.27418	0.582193	12	12	0.0113377	0.036937
K03583..exodeoxyribonuclease.V.gamma.subunit..EC.3.1.11.5.	1.95059	0.49934	12	11	0.0113367	0.036937
K02552..menaquinone.specific.isochorismate.synthase..EC.5.4.4.2.	1.23896	0.317309	12	9	0.0113568	0.0369667
K01191..alpha.mannosidase..EC.3.2.1.24.	-2.36225	0.605691	12	8	0.0114083	0.0369724
K01464..dihydropyrimidinase..EC.3.5.2.2.	2.59951	0.667159	12	11	0.011451	0.0369724
K02111..F.type.H..transporting.ATPase.subunit.alpha..EC.3.6.3.14.	-1.2136	0.311198	12	12	0.0114121	0.0369724
K02299..cytochrome.o.ubiquinol.oxidase.subunit.III	2.16147	0.554365	12	12	0.0114208	0.0369724
K02777..PTS.system..sugar.specific.IIA.component..EC.2.7.1...	1.61889	0.415573	12	11	0.0114603	0.0369724
K02846..N.methyl.L.tryptophan.oxidase	2.02906	0.520269	12	12	0.0114091	0.0369724
K03449..MFS.transporter..CP.family..cyanate.transporter	1.09223	0.280231	12	10	0.0114369	0.0369724
K07220..hypothetical.protein	-2.31945	0.595032	12	10	0.0114321	0.0369724
K11938..HMP.PP.phosphatase	1.09798	0.281902	12	10	0.011468	0.0369724
K13566..omega.amidase..EC.3.5.1.3.	0.71411	0.183332	12	10	0.0114649	0.0369724
K22110..NO_NAME	2.09607	0.537988	12	10	0.0114539	0.0369724
K00793..riboflavin.synthase..EC.2.5.1.9.	1.06875	0.274508	12	12	0.0114863	0.0369778
K01546..K..transporting.ATPase.ATPase.A.chain..EC.3.6.3.12.	-1.15637	0.374513	12	12	0.0114896	0.0369778
K11066..N.acetylmuramoyl.L.alanine.amidase	1.25616	0.323015	12	10	0.0115382	0.037038
K15531..NO_NAME	-2.70315	0.695008	12	11	0.0115321	0.037038
K15587..nickel.transport.system.ATP.binding.protein..EC.3.6.3.24.	1.57328	0.404486	12	10	0.0115297	0.037038
K05874..methyl.accepting.chemotaxis.protein.I..serine.sensor.receptor	0.976388	0.251234	12	10	0.0115673	0.037082
K11750..esterase.FrsA	2.58853	0.666122	12	12	0.0115719	0.037082
K07703..two.component.system..CitB.family..response.regulator.DcuR	1.42913	0.367876	12	10	0.0115854	0.0370932
K03468..putative.efflux.transporter..PET.family	1.93975	0.49992	12	12	0.0116406	0.0371418
K05712..3..3.hydroxy.phenyl.propionate.hydroxylase..EC.1.14.13.127.	1.16293	0.299643	12	10	0.0116295	0.0371418
K08992..putative.membrane.protein	1.79154	0.581427	12	11	0.0116153	0.0371418
K14065..NO_NAME	0.823578	0.212238	12	10	0.0116366	0.0371418
K10678..nitroreductase..EC.1.......	1.58078	0.407501	12	7	0.0116513	0.0371442
K03060..DNA.directed.RNA.polymerase.subunit.omega..EC.2.7.7.6.	0.841973	0.273516	12	12	0.0116738	0.0371522
K14348..NO_NAME	1.25307	0.323128	12	10	0.011666	0.0371522
K00647..3.oxoacyl..acyl.carrier.protein..synthase.I..EC.2.3.1.41.	1.22063	0.315119	12	12	0.0117179	0.0371972
K02028..polar.amino.acid.transport.system.ATP.binding.protein	-1.4284	0.368756	12	12	0.011718	0.0371972
K04027..ethanolamine.utilization.protein.EutM	2.04154	0.526877	12	12	0.0117034	0.0371972
K02403..flagellar.transcriptional.activator.FlhD	1.42912	0.464938	12	11	0.0117645	0.0372814
K02434..aspartyl.tRNA.Asn..glutamyl.tRNA.Gln..amidotransferase.subunit.B..EC.6.3.5.6.6.3.5.7.	-2.19239	0.566572	12	9	0.0117654	0.0372814
K10017..histidine.transport.system.ATP.binding.protein..EC.3.6.3.21.	2.23786	0.578438	12	11	0.0117747	0.0372814
K01693..imidazoleglycerol.phosphate.dehydratase..EC.4.2.1.19.	-2.26424	0.585948	12	12	0.0118292	0.0373903
K05997..Fe.S.cluster.assembly.protein.SufA	1.4587	0.377424	12	11	0.0118213	0.0373903
K10823..oligopeptide.transport.system.ATP.binding.protein	2.16759	0.561436	12	11	0.0118703	0.0374816
K12660..2.dehydro.3.deoxy.L.rhamnonate.aldolase..EC.4.1.2.53.	1.35452	0.350898	12	10	0.0118783	0.0374816
K09157..hypothetical.protein	-1.81686	0.470928	12	12	0.0118897	0.0374858
K07235..tRNA.2.thiouridine.synthesizing.protein.D..EC.2.8.1...	1.28986	0.334386	12	11	0.0119112	0.0375217
K00135..succinate.semialdehyde.dehydrogenase...glutarate.semialdehyde.dehydrogenase..EC.1.2.1.16.1.2.1.79.1.2.1.20.	1.37448	0.356651	12	11	0.0119542	0.0376254
K04042..bifunctional.UDP.N.acetylglucosamine.pyrophosphorylase...Glucosamine.1.phosphate.N.acetyltransferase..EC.2.7.7.23.2.3.1.157.	0.542774	0.141169	12	12	0.0120639	0.0379064
K07351..fimbrial.protein	1.41417	0.367763	12	7	0.0120581	0.0379064
K02358..elongation.factor.EF.Tu	-0.7395	0.19253	12	12	0.0121119	0.0379633
K03572..DNA.mismatch.repair.protein.MutL	-0.916345	0.299784	12	11	0.0121127	0.0379633
K06901..putative.MFS.transporter..AGZA.family..xanthine.uracil.permease	0.989778	0.257584	12	12	0.0120924	0.0379633
K07289..AsmA.protein	0.782415	0.203798	12	10	0.0121338	0.0379975
K09477..citrate.succinate.antiporter	1.88509	0.491455	12	12	0.0121764	0.0380988
K11075..putrescine.transport.system.permease.protein	2.45555	0.640911	12	11	0.0122309	0.038237
K05964..holo.ACP.synthase..EC.2.7.7.61.	1.92777	0.503454	12	10	0.012259	0.0382645
K07005..NO_NAME	-3.10351	0.810532	12	6	0.0122605	0.0382645
K09913..hypothetical.protein	1.68367	0.552186	12	11	0.0122706	0.0382645
K07773..two.component.system..OmpR.family..aerobic.respiration.control.protein.ArcA	1.78658	0.466894	12	12	0.012291	0.0382961
K01872..alanyl.tRNA.synthetase..EC.6.1.1.7.	-1.63283	0.426805	12	12	0.0123014	0.0382963
K02773..PTS.system..galactitol.specific.IIA.component..EC.2.7.1.200.	1.18158	0.309117	12	12	0.0123425	0.0383921
K12339..cysteine.synthase.B..EC.2.5.1.47.	1.6953	0.443788	12	12	0.0123721	0.0384519
K04046..hypothetical.chaperone.protein	0.886134	0.232143	12	8	0.0124086	0.0385053
K07248..lactaldehyde.dehydrogenase...glycolaldehyde.dehydrogenase..EC.1.2.1.22.1.2.1.21.	1.71161	0.448408	12	12	0.01241	0.0385053
K01420..CRP.FNR.family.transcriptional.regulator..anaerobic.regulatory	1.9652	0.515311	12	12	0.012454	0.0385223
K01659..2.methylcitrate.synthase..EC.2.3.3.5.	2.56592	0.672667	12	11	0.0124421	0.0385223
K05522..endonuclease.VIII..EC.3.2.2...4.2.99.18.	1.17865	0.308948	12	9	0.0124357	0.0385223
K05846..osmoprotectant.transport.system.permease.protein	1.62676	0.426645	12	11	0.0124631	0.0385223
K10544..D.xylose.transport.system.permease.protein	1.48549	0.389631	12	11	0.0124674	0.0385223
K04067..primosomal.replication.protein.N..	1.36398	0.358062	12	10	0.0125085	0.0386172
K02405..RNA.polymerase.sigma.factor.for.flagellar.operon.FliA	1.61303	0.423814	12	12	0.0125515	0.0386457
K03587..cell.division.protein.FtsI..penicillin.binding.protein.3.	1.00775	0.264792	12	12	0.0125535	0.0386457
K10124..carbohydrate.specific.outer.membrane.porin	2.10045	0.551969	12	8	0.0125593	0.0386457
K15735..NO_NAME	1.05584	0.277426	12	10	0.0125533	0.0386457
K00769..xanthine.phosphoribosyltransferase..EC.2.4.2.22.	2.13325	0.561131	12	11	0.0126065	0.0386724
K01093..4.phytase...acid.phosphatase..EC.3.1.3.26.3.1.3.2.	1.62933	0.428757	12	10	0.0126268	0.0386724
K01696..tryptophan.synthase.beta.chain..EC.4.2.1.20.	-1.54985	0.407948	12	12	0.0126398	0.0386724
K02079..N.acetylgalactosamine.6.phosphate.deacetylase..EC.3.5.1.25.	1.51337	0.398418	12	10	0.0126485	0.0386724
K02380..FdhE.protein	2.62055	0.6892	12	11	0.0125987	0.0386724
K03563..carbon.storage.regulator	1.46261	0.385003	12	11	0.012642	0.0386724
K10550..D.allose.transport.system.permease.protein	1.73348	0.456435	12	10	0.0126562	0.0386724
K17319..putative.aldouronate.transport.system.permease.protein	-1.18618	0.312363	12	12	0.0126617	0.0386724
K18471..methylglyoxal.reductase..EC.1.1.1...	1.22886	0.323441	12	8	0.0126371	0.0386724
K01627..2.dehydro.3.deoxyphosphooctonate.aldolase..KDO.8.P.synthase...EC.2.5.1.55.	2.51866	0.663756	12	11	0.012699	0.0386781
K02874..large.subunit.ribosomal.protein.L14	-0.543885	0.14335	12	12	0.0127048	0.0386781
K03299..gluconate.H..symporter..GntP.family	1.16285	0.306472	12	9	0.0127023	0.0386781
K03485..LacI.family.transcriptional.regulator..trehalose.operon.repressor	1.84658	0.486701	12	12	0.0127053	0.0386781
K19049..NO_NAME	-2.23595	0.637963	12	5	0.012752	0.0387887
K01494..dCTP.deaminase..EC.3.5.4.13.	1.47606	0.389874	12	12	0.0128107	0.0388718
K01881..prolyl.tRNA.synthetase..EC.6.1.1.15.	-1.19502	0.315615	12	12	0.0128066	0.0388718
K02024..maltoporin	2.40875	0.636042	12	11	0.0127965	0.0388718
K02681..prepilin.peptidase.dependent.protein.C	1.48984	0.394124	12	10	0.0128881	0.0390533
K08483..phosphotransferase.system..enzyme.I..PtsI..EC.2.7.3.9.	0.606035	0.160366	12	12	0.0129021	0.0390533
K09136..hypothetical.protein	1.54445	0.408608	12	12	0.0128927	0.0390533
K00059..3.oxoacyl..acyl.carrier.protein..reductase..EC.1.1.1.100.	-0.973122	0.257713	12	12	0.0129431	0.0390954
K05939..acyl..acyl.carrier.protein..phospholipid.O.acyltransferase...long.chain.fatty.acid...acyl.carrier.protein..ligase..EC.2.3.1.40.6.2.1.20.	2.22792	0.589911	12	12	0.0129335	0.0390954
K09979..hypothetical.protein	1.73256	0.458876	12	8	0.0129476	0.0390954
K00951..GTP.pyrophosphokinase..EC.2.7.6.5.	-1.19057	0.394757	12	11	0.0129847	0.0391635
K03387..alkyl.hydroperoxide.reductase.subunit.F	1.62266	0.430232	12	10	0.0130018	0.0391635
K04043..molecular.chaperone.DnaK	-1.421	0.376758	12	12	0.0130008	0.0391635
K11382..MFS.transporter..OPA.family..phosphoglycerate.transporter.protein	2.47399	0.656132	12	10	0.0130153	0.0391725
K07676..two.component.system..NarL.family..sensor.histidine.kinase.RcsD..EC.2.7.13.3.	2.30214	0.610885	12	11	0.0130427	0.0392232
K02775..PTS.system..galactitol.specific.IIC.component	1.53162	0.406775	12	10	0.0130861	0.0392584
K02926..large.subunit.ribosomal.protein.L4	-0.489336	0.129941	12	12	0.0130788	0.0392584
K09912..hypothetical.protein	1.94705	0.646483	12	6	0.0130782	0.0392584
K01002..phosphoglycerol.transferase	2.3922	0.635811	12	9	0.0131246	0.0393104
K01910...citrate..pro.3S..lyase..ligase..EC.6.2.1.22.	0.844161	0.224366	12	10	0.0131246	0.0393104
K09891..hypothetical.protein	2.33879	0.621834	12	11	0.0131425	0.0393323
K15548..NO_NAME	1.74831	0.465045	12	10	0.013165	0.0393678
K13892..glutathione.transport.system.ATP.binding.protein	1.11651	0.297166	12	9	0.0131954	0.0394271
K02671..type.IV.pilus.assembly.protein.PilV	-1.89458	0.504569	12	10	0.0132274	0.039459
K03179..4.hydroxybenzoate.polyprenyltransferase..EC.2.5.1.39.	2.38286	0.634536	12	11	0.0132217	0.039459
K08160..MFS.transporter..DHA1.family..multidrug.chloramphenicol.efflux	1.28584	0.342829	12	12	0.0132846	0.0395978
K03764..transcriptional.repressor.of.met.regulon..beta.ribbon..MetJ.family.	1.9976	0.533047	12	11	0.0133278	0.039663
K08092..3.dehydro.L.gulonate.2.dehydrogenase..EC.1.1.1.130.	2.38653	0.636766	12	11	0.0133226	0.039663
K07140..NO_NAME	1.17462	0.313687	12	9	0.0133685	0.0397523
K00060..threonine.3.dehydrogenase..EC.1.1.1.103.	2.51351	0.671687	12	10	0.0134026	0.0398218
K05879..dihydroxyacetone.kinase..C.terminal.domain..EC.2.7.1...	1.49762	0.40062	12	10	0.0134558	0.039916
K06200..carbon.starvation.protein	1.28145	0.342747	12	12	0.0134489	0.039916
K03585..membrane.fusion.protein..multidrug.efflux.system	-0.584055	0.156299	12	12	0.0134761	0.0399443
K16346..NO_NAME	1.87571	0.502096	12	9	0.0134904	0.0399547
K00138..aldehyde.dehydrogenase..EC.1.2.1...	1.5301	0.410026	12	10	0.0135468	0.040058
K06213..magnesium.transporter	-2.55377	0.68431	12	10	0.013545	0.040058
K00338..NADH.quinone.oxidoreductase.subunit.I..EC.1.6.5.3.	1.29805	0.348227	12	12	0.0136049	0.0400703
K03618..hydrogenase.1.operon.protein.HyaF	1.67023	0.448017	12	9	0.0135982	0.0400703
K03769..peptidyl.prolyl.cis.trans.isomerase.C	1.70458	0.457139	12	11	0.0135879	0.0400703
K07238..zinc.transporter..ZIP.family	1.36934	0.367221	12	11	0.0135859	0.0400703
K18831..NO_NAME	1.85269	0.496628	12	8	0.0135634	0.0400703
K19304..NO_NAME	1.40022	0.375717	12	10	0.013616	0.0400713
K08307..membrane.bound.lytic.murein.transglycosylase.D	1.53548	0.412148	12	12	0.0136337	0.0400914
K03078..3.dehydro.L.gulonate.6.phosphate.decarboxylase..EC.4.1.1.85.	1.75165	0.470528	12	12	0.0136733	0.0401763
K01736..chorismate.synthase..EC.4.2.3.5.	-1.11741	0.300629	12	12	0.0137559	0.0403551
K03970..phage.shock.protein.B	1.56824	0.421874	12	10	0.0137502	0.0403551
K00600..glycine.hydroxymethyltransferase..EC.2.1.2.1.	-1.01159	0.272323	12	12	0.0137879	0.0404171
K03558..membrane.protein.required.for.colicin.V.production	1.99291	0.537286	12	11	0.0138663	0.0404909
K03628..transcription.termination.factor.Rho	1.74887	0.471601	12	12	0.0138785	0.0404909
K04655..hydrogenase.expression.formation.protein.HypE	1.03101	0.277991	12	12	0.0138723	0.0404909
K07665..two.component.system..OmpR.family..copper.resistance.phosphate.regulon.response.regulator.CusR	1.59285	0.429093	12	9	0.0138244	0.0404909
K07740..regulator.of.sigma.D	2.34765	0.632765	12	10	0.0138527	0.0404909
K22015..NO_NAME	1.35714	0.365818	12	12	0.0138566	0.0404909
K01889..phenylalanyl.tRNA.synthetase.alpha.chain..EC.6.1.1.20.	-1.05922	0.28574	12	12	0.0138988	0.0404997
K03761..MFS.transporter..MHS.family..alpha.ketoglutarate.permease	1.7996	0.485606	12	11	0.0139143	0.0404997
K06041..arabinose.5.phosphate.isomerase..EC.5.3.1.13.	0.906426	0.244587	12	12	0.0139133	0.0404997
K07711..two.component.system..NtrC.family..sensor.histidine.kinase.GlrK..EC.2.7.13.3.	1.26151	0.34056	12	9	0.013938	0.0405057
K12500..thioesterase.III	1.47885	0.399233	12	10	0.0139381	0.0405057
K07702..two.component.system..CitB.family..response.regulator.CitB	1.36991	0.37	12	10	0.0139639	0.0405489
K12963..undecaprenyl.phosphate.alpha.L.ara4N.flippase.subunit.ArnF	0.975213	0.264162	12	10	0.0141204	0.040954
K13979..NO_NAME	1.31202	0.355428	12	10	0.0141255	0.040954
K02492..glutamyl.tRNA.reductase..EC.1.2.1.70.	3.07712	0.833918	12	11	0.0141463	0.0409823
K02199..cytochrome.c.biogenesis.protein.CcmG..thiol.disulfide.interchange	1.38813	0.376312	12	11	0.0141639	0.0410014
K07470..DNA.gyrase.inhibitor	1.37727	0.373656	12	10	0.0142057	0.0410584
K10213..ribosylpyrimidine.nucleosidase..EC.3.2.2.8.	1.3414	0.363899	12	10	0.0142019	0.0410584
K16786..energy.coupling.factor.transport.system.ATP.binding.protein..EC.3.6.3...	-1.99999	0.542899	12	12	0.0142356	0.0411127
K00571..site.specific.DNA.methyltransferase..adenine.specific.	-2.68492	0.906655	12	9	0.0142552	0.0411375
K07660..two.component.system..OmpR.family..response.regulator.PhoP	1.62901	0.443159	12	10	0.0143546	0.0413921
K06144..universal.stress.protein.B	2.28995	0.623349	12	12	0.014389	0.041459
K03621..glycerol.3.phosphate.acyltransferase.PlsX..EC.2.3.1.15.	1.21898	0.331917	12	12	0.0144051	0.0414732
K06283..putative.DeoR.family.transcriptional.regulator..stage.III	-2.11169	0.575297	12	6	0.0144342	0.0415249
K03639..cyclic.pyranopterin.phosphate.synthase..EC.4.1.99.18.	1.97937	0.53949	12	12	0.0144591	0.0415642
K08999..hypothetical.protein	-2.72489	0.923393	12	7	0.0145109	0.0416489
K12148..biofilm.regulator.BssS	1.16157	0.316874	12	10	0.0145078	0.0416489
K04758..ferrous.iron.transport.protein.A	0.589771	0.200063	12	12	0.0145865	0.0418329
K08723..5..nucleotidase..EC.3.1.3.5.	0.821226	0.224389	12	10	0.0145976	0.0418329
K00325..NAD.P..transhydrogenase.subunit.beta..EC.1.6.1.2.	1.95268	0.533759	12	12	0.0146199	0.0418646
K01805..xylose.isomerase..EC.5.3.1.5.	-1.32802	0.363213	12	12	0.0146513	0.04189
K21965..NO_NAME	1.49877	0.409839	12	9	0.0146409	0.04189
K00847..fructokinase..EC.2.7.1.4.	-0.833448	0.228081	12	12	0.014684	0.041951
K03749..DedD.protein	1.17415	0.321517	12	10	0.0147189	0.0419649
K11738..L.asparagine.permease	2.38328	0.652442	12	12	0.0147041	0.0419649
K12525..bifunctional.aspartokinase...homoserine.dehydrogenase.2..EC.2.7.2.4.1.1.1.3.	2.08354	0.570575	12	11	0.0147227	0.0419649
K00791..tRNA.dimethylallyltransferase..EC.2.5.1.75.	-0.624274	0.171094	12	12	0.0147682	0.0420621
K03832..periplasmic.protein.TonB	-3.46055	0.94936	12	11	0.0148234	0.0421872
K07098..NO_NAME	-3.09033	0.848065	12	10	0.0148416	0.0421892
K19784..NO_NAME	1.66722	0.457572	12	12	0.0148469	0.0421892
K01823..isopentenyl.diphosphate.Delta.isomerase..EC.5.3.3.2.	0.937354	0.25731	12	12	0.0148582	0.0421892
K02440..glycerol.uptake.facilitator.protein	1.20035	0.329612	12	10	0.0148768	0.0421902
K03752..molybdopterin.guanine.dinucleotide.biosynthesis.protein.A	1.49361	0.410172	12	11	0.0148813	0.0421902
K00564..ribosomal.RNA.small.subunit.methyltransferase.C	1.49121	0.409743	12	10	0.0149132	0.0422326
K01424..L.asparaginase..EC.3.5.1.1.	0.509158	0.139917	12	12	0.014919	0.0422326
K09994..PhnO.protein	1.20152	0.330849	12	9	0.015035	0.0425245
K16321..NO_NAME	1.67488	0.461274	12	9	0.015045	0.0425245
K00789..S.adenosylmethionine.synthetase..EC.2.5.1.6.	-1.2206	0.336545	12	12	0.0151103	0.0425612
K04025..ethanolamine.utilization.protein.EutK	1.15451	0.318304	12	10	0.0151072	0.0425612
K07147..NO_NAME	1.49534	0.412415	12	12	0.0151268	0.0425612
K07796..outer.membrane.protein..Cu.I..Ag.I..efflux.system	1.32071	0.363914	12	10	0.0150736	0.0425612
K10985..PTS.system..galactosamine.specific.IIC.component	2.09823	0.578644	12	12	0.0151219	0.0425612
K16710..NO_NAME	1.25116	0.345039	12	11	0.0151216	0.0425612
K01462..NO_NAME	-0.647223	0.178567	12	12	0.015147	0.0425858
K00796..dihydropteroate.synthase..EC.2.5.1.15.	-0.707518	0.241932	12	12	0.0151844	0.0425944
K03205..type.IV.secretion.system.protein.VirD4	-1.38768	0.383081	12	12	0.0151808	0.0425944
K21742..NO_NAME	1.03496	0.285727	12	10	0.0151844	0.0425944
K03438..S.adenosyl.methyltransferase	-0.84323	0.233026	12	12	0.0152419	0.0426765
K06929..NO_NAME	2.25542	0.623351	12	11	0.0152482	0.0426765
K15552..taurine.transport.system.permease.protein	3.5468	0.979979	12	7	0.0152314	0.0426765
K00613..glycine.amidinotransferase..EC.2.1.4.1.	-1.60622	0.444116	12	6	0.0152729	0.0427135
K05780..alpha.D.ribose.1.methylphosphonate.5.triphosphate.synthase.subunit.PhnL..EC.2.7.8.37.	1.24143	0.343335	12	10	0.015287	0.0427207
K00108..choline.dehydrogenase..EC.1.1.99.1.	1.73852	0.482009	12	9	0.015432	0.0430482
K01485..cytosine.deaminase..EC.3.5.4.1.	1.25435	0.347812	12	10	0.015439	0.0430482
K10541..methyl.galactoside.transport.system.permease.protein	1.82444	0.505729	12	12	0.0154201	0.0430482
K06187..recombination.protein.RecR	-0.553771	0.153618	12	12	0.0154638	0.0430852
K01815..4.deoxy.L.threo.5.hexosulose.uronate.ketol.isomerase..EC.5.3.1.17.	-0.92696	0.257233	12	12	0.0154848	0.0431113
K03148..sulfur.carrier.protein.ThiS.adenylyltransferase..EC.2.7.7.73.	2.16436	0.601025	12	11	0.015525	0.0431586
K09900..hypothetical.protein	1.65569	0.459712	12	11	0.0155172	0.0431586
K03502..DNA.polymerase.V	1.34119	0.372887	12	12	0.0155961	0.0433239
K01284..peptidyl.dipeptidase.Dcp	-1.9798	0.681158	12	11	0.0156577	0.0434624
K03757..cadaverine.lysine.antiporter	1.40686	0.391851	12	12	0.0157031	0.0435325
K13993..HSP20.family.protein	-2.20032	0.659865	12	5	0.0157064	0.0435325
K02037..phosphate.transport.system.permease.protein	0.834609	0.232523	12	12	0.0157188	0.0435343
K10975..allantoin.permease	1.8884	0.526481	12	12	0.0157606	0.0436176
K01791..UDP.N.acetylglucosamine.2.epimerase..non.hydrolysing...EC.5.1.3.14.	0.958643	0.267524	12	12	0.0158181	0.0437441
K09014..Fe.S.cluster.assembly.protein.SufB	-0.85865	0.23968	12	12	0.0158332	0.0437533
K10805..acyl.CoA.thioesterase.II..EC.3.1.2...	1.55794	0.435394	12	12	0.0159045	0.0439176
K03119..taurine.dioxygenase..EC.1.14.11.17.	1.97141	0.551291	12	11	0.0159425	0.0439899
K01241..AMP.nucleosidase..EC.3.2.2.4.	2.22804	0.623562	12	11	0.0159915	0.0440422
K02422..flagellar.protein.FliS	1.06895	0.29927	12	7	0.0160121	0.0440422
K02653..type.IV.pilus.assembly.protein.PilC	-2.55033	0.713866	12	9	0.0160003	0.0440422
K03753..molybdopterin.guanine.dinucleotide.biosynthesis.protein.B	1.30539	0.365588	12	10	0.0160326	0.0440422
K11392..ribosomal.RNA.small.subunit.methyltransferase.F	1.94641	0.545091	12	8	0.0160301	0.0440422
K21990..NO_NAME	1.79337	0.501874	12	9	0.015987	0.0440422
K03087..RNA.polymerase.nonessential.primary.like.sigma.factor	2.34905	0.658195	12	11	0.0160618	0.0440636
K06167..phosphoribosyl.1.2.cyclic.phosphate.phosphodiesterase..EC.3.1.4.55.	1.06255	0.297775	12	9	0.0160727	0.0440636
K07039..NO_NAME	0.776015	0.217487	12	10	0.016076	0.0440636
K02521..LysR.family.transcriptional.regulator..positive.regulator.for.ilvC	1.96741	0.551772	12	10	0.0161184	0.0441147
K09954..hypothetical.protein	0.66992	0.187854	12	9	0.016109	0.0441147
K02217..ferritin.1	-0.767493	0.21538	12	12	0.0161556	0.0441514
K21086..NO_NAME	1.6052	0.450398	12	8	0.0161465	0.0441514
K06168..bifunctional.enzyme.involved.in.thiolation.and.methylation.of.tRNA	-1.33756	0.375493	12	12	0.0161778	0.0441797
K03289..MFS.transporter..NHS.family..nucleoside.permease	1.05365	0.29607	12	10	0.0162356	0.044305
K02945..small.subunit.ribosomal.protein.S1	-1.28517	0.36167	12	12	0.0163279	0.044421
K03503..DNA.polymerase.V	1.0651	0.299757	12	10	0.0163316	0.044421
K03690..hypothetical.protein	1.70705	0.480472	12	11	0.0163379	0.044421
K07709..two.component.system..NtrC.family..sensor.histidine.kinase.HydH..EC.2.7.13.3.	1.59701	0.449359	12	9	0.0163185	0.044421
K09970..general.L.amino.acid.transport.system.permease.protein	1.08199	0.304487	12	10	0.0163272	0.044421
K07791..anaerobic.C4.dicarboxylate.transporter.DcuA	1.0685	0.300861	12	10	0.0163618	0.0444534
K19577..NO_NAME	1.77306	0.499405	12	11	0.0163817	0.0444748
K03722..ATP.dependent.DNA.helicase.DinG	0.936888	0.264015	12	12	0.0164116	0.0445235
K00962..polyribonucleotide.nucleotidyltransferase..EC.2.7.7.8.	-1.32937	0.374777	12	12	0.016438	0.0445625
K03673..thiol.disulfide.interchange.protein.DsbA	0.916375	0.258661	12	10	0.0165139	0.0447052
K12582..NO_NAME	1.67128	0.471751	12	11	0.0165147	0.0447052
K01610..phosphoenolpyruvate.carboxykinase..ATP...EC.4.1.1.49.	-1.27644	0.360378	12	12	0.0165284	0.0447099
K03574..7.8.dihydro.8.oxoguanine.triphosphatase	1.20497	0.340419	12	12	0.0165686	0.0447553
K13896..microcin.C.transport.system.ATP.binding.protein	3.21221	0.907503	12	8	0.0165693	0.0447553
K00012..UDPglucose.6.dehydrogenase..EC.1.1.1.22.	-1.31094	0.370741	12	10	0.0166332	0.0448951
K06916..NO_NAME	1.37063	0.38776	12	9	0.0166553	0.0449222
K19776..NO_NAME	1.09425	0.309698	12	9	0.0166814	0.0449599
K00860..adenylylsulfate.kinase..EC.2.7.1.25.	0.568955	0.161075	12	12	0.0166999	0.0449772
K00098..L.idonate.5.dehydrogenase	1.10148	0.31196	12	7	0.0167246	0.0450111
K02562..mannitol.operon.repressor	2.06485	0.585601	12	12	0.0168105	0.0452095
K01423..NO_NAME	1.1878	0.336978	12	10	0.0168315	0.0452333
K03765..transcriptional.activator.of.cad.operon	1.3989	0.397004	12	10	0.0168536	0.0452598
K02556..chemotaxis.protein.MotA	1.39467	0.396209	12	12	0.0169182	0.0454004
K21011..NO_NAME	-2.15297	0.752724	12	7	0.01695	0.045453
K03718..Lrp.AsnC.family.transcriptional.regulator..regulator.for.asnA..asnC	1.6007	0.455296	12	9	0.0169963	0.0454662
K03834..tyrosine.specific.transport.protein	1.70089	0.483855	12	7	0.0170042	0.0454662
K10545..D.xylose.transport.system.ATP.binding.protein..EC.3.6.3.17.	1.40566	0.399644	12	10	0.0169683	0.0454662
K11939..inner.membrane.transporter.RhtA	2.20238	0.62675	12	11	0.0170284	0.0454662
K12113..LacI.family.transcriptional.regulator..ebg.operon.repressor	1.44251	0.410455	12	10	0.0170203	0.0454662
K22051..NO_NAME	1.15373	0.328125	12	9	0.0169888	0.0454662
K02863..large.subunit.ribosomal.protein.L1	-1.0408	0.29648	12	12	0.0170909	0.0455958
K10947..PadR.family.transcriptional.regulator..regulatory.protein.PadR	-3.53208	1.0063	12	9	0.0171015	0.0455958
K07464..putative.RecB.family.exonuclease	-2.76886	0.789064	12	6	0.0171182	0.0456077
K09772..hypothetical.protein	-2.35284	0.824841	12	12	0.017177	0.0457187
K19160..NO_NAME	1.21467	0.346512	12	8	0.0171845	0.0457187
K01355..omptin	0.91687	0.261866	12	9	0.0172605	0.0458879
K00697..trehalose.6.phosphate.synthase..EC.2.4.1.15.	1.42349	0.406661	12	10	0.0172766	0.0458979
K09798..hypothetical.protein	1.28824	0.368158	12	10	0.0173	0.0459274
K02062..thiamine.transport.system.ATP.binding.protein	1.8356	0.524694	12	10	0.0173138	0.045931
K15633..2.3.bisphosphoglycerate.independent.phosphoglycerate.mutase..EC.5.4.2.12.	-0.797154	0.228058	12	12	0.0173696	0.0460462
K11473..glycolate.oxidase.iron.sulfur.subunit	1.59787	0.457395	12	10	0.0174067	0.0461115
K01226..trehalose.6.phosphate.hydrolase..EC.3.2.1.93.	1.51433	0.433601	12	11	0.0174248	0.0461267
K01653..acetolactate.synthase.I.III.small.subunit..EC.2.2.1.6.	0.638741	0.183095	12	12	0.017497	0.0462848
K12262..cytochrome.b561	1.6875	0.483823	12	10	0.0175107	0.0462882
K02853..4.alpha.L.fucosyltransferase	1.74453	0.500642	12	9	0.0175721	0.0464172
K09786..hypothetical.protein	2.18137	0.626302	12	9	0.0176031	0.0464662
K04019..ethanolamine.utilization.protein.EutA	2.25291	0.647655	12	12	0.0176859	0.046615
K09797..hypothetical.protein	-1.83126	0.565323	12	5	0.0176971	0.046615
K14588..NO_NAME	2.25281	0.647652	12	10	0.0176887	0.046615
K02899..large.subunit.ribosomal.protein.L27	-0.402123	0.115684	12	12	0.0177341	0.0466794
K00971..mannose.1.phosphate.guanylyltransferase..EC.2.7.7.13.	-0.97077	0.27935	12	12	0.0177517	0.0466926
K02843..heptosyltransferase.II..EC.2.4.....	2.04083	0.588438	12	10	0.0178835	0.0470058
K00137..aminobutyraldehyde.dehydrogenase..EC.1.2.1.19.	1.01363	0.29293	12	10	0.0180364	0.0473074
K00795..farnesyl.diphosphate.synthase..EC.2.5.1.1.2.5.1.10.	1.98657	0.574087	12	12	0.0180346	0.0473074
K16301..NO_NAME	1.32086	0.381671	12	8	0.0180281	0.0473074
K02388..flagellar.basal.body.rod.protein.FlgC	1.3855	0.400741	12	10	0.0180941	0.0473422
K02484..two.component.system..OmpR.family..sensor.kinase	0.821538	0.237536	12	9	0.01807	0.0473422
K03442..small.conductance.mechanosensitive.ion.channel..MscS.family	1.10573	0.319852	12	12	0.0181007	0.0473422
K07637..two.component.system..OmpR.family..sensor.histidine.kinase.PhoQ..EC.2.7.13.3.	0.958886	0.277358	12	10	0.0180966	0.0473422
K07349..minor.fimbrial.subunit	1.44415	0.417938	12	9	0.0181313	0.0473888
K02170..pimeloyl..acyl.carrier.protein..methyl.ester.esterase..EC.3.1.1.85.	1.14845	0.332501	12	10	0.0181597	0.047408
K07245..putative.copper.resistance.protein.D	1.13564	0.328813	12	10	0.0181641	0.047408
K03810..virulence.factor	1.36318	0.39529	12	10	0.0182658	0.0476398
K05714..2.hydroxy.6.oxonona.2.4.dienedioate.hydrolase..EC.3.7.1.14.	1.24667	0.361741	12	7	0.0183104	0.0476405
K05777..putative.thiamine.transport.system.substrate.binding.protein	1.73149	0.502198	12	10	0.0182803	0.0476405
K08321..putative.autoinducer.2..AI.2..aldolase	1.22928	0.35673	12	8	0.0183173	0.0476405
K12943..NO_NAME	1.15909	0.336359	12	10	0.0183163	0.0476405
K02662..type.IV.pilus.assembly.protein.PilM	-1.61218	0.46821	12	10	0.0183704	0.0476523
K07184..SH3.domain.protein	1.80209	0.523388	12	9	0.0183732	0.0476523
K09975..hypothetical.protein	1.03975	0.301909	12	10	0.0183577	0.0476523
K21085..NO_NAME	1.27446	0.370078	12	10	0.0183606	0.0476523
K02822..PTS.system..ascorbate.specific.IIB.component..EC.2.7.1.194.	1.87255	0.544123	12	11	0.0184073	0.0477075
K03329..hypothetical.protein	1.11015	0.322853	12	10	0.018464	0.0478211
K03577..TetR.AcrR.family.transcriptional.regulator..acrAB.operon.repressor	0.597606	0.173855	12	10	0.0184874	0.0478482
K02679..prepilin.peptidase.dependent.protein.A	0.993449	0.289214	12	10	0.0185352	0.0479204
K03043..DNA.directed.RNA.polymerase.subunit.beta..EC.2.7.7.6.	-1.30121	0.378842	12	12	0.0185411	0.0479204
K00991..2.C.methyl.D.erythritol.4.phosphate.cytidylyltransferase..EC.2.7.7.60.	-0.523496	0.152522	12	12	0.01859	0.0479731
K03185..2.octaprenyl.6.methoxyphenol.hydroxylase..EC.1.14.13...	1.20166	0.350046	12	10	0.0185778	0.0479731
K08219..MFS.transporter..UMF2.family..putative.MFS.family.transporter	1.14329	0.333276	12	8	0.0186261	0.0479731
K09927..hypothetical.protein	1.82086	0.530782	12	9	0.0186249	0.0479731
K10679..nitroreductase...dihydropteridine.reductase..EC.1.......1.5.1.34.	0.913144	0.26618	12	9	0.0186245	0.0479731
K11719..lipopolysaccharide.export.system.protein.LptC	1.61809	0.471861	12	12	0.0186525	0.0480078
K00574..cyclopropane.fatty.acyl.phospholipid.synthase	1.763	0.514403	12	10	0.0186904	0.0480479
K07078..NO_NAME	-3.34909	0.977236	12	8	0.0186939	0.0480479
K13630..NO_NAME	1.99145	0.581235	12	10	0.0187116	0.04806
K02410..flagellar.motor.switch.protein.FliG	1.30254	0.381073	12	10	0.0188774	0.0484189
K06895..NO_NAME	1.95847	0.572931	12	7	0.018872	0.0484189
K01521..CDP.diacylglycerol.pyrophosphatase..EC.3.6.1.26.	1.43987	0.42138	12	9	0.0188987	0.0484402
K02099..AraC.family.transcriptional.regulator..arabinose.operon.regulatory	1.9795	0.579877	12	12	0.0189682	0.0485514
K04517..prephenate.dehydrogenase..EC.1.3.1.12.	-1.5561	0.455827	12	7	0.018965	0.0485514
K01690..phosphogluconate.dehydratase..EC.4.2.1.12.	1.75538	0.514477	12	10	0.0190025	0.0485721
K04770..Lon.like.ATP.dependent.protease	0.772062	0.226277	12	10	0.0190016	0.0485721
K02421..flagellar.biosynthetic.protein.FliR	0.72615	0.213223	12	10	0.0191347	0.0488427
K06918..NO_NAME	2.08356	0.611725	12	10	0.0191255	0.0488427
K00242..succinate.dehydrogenase...fumarate.reductase..membrane.anchor.subunit	2.33487	0.685995	12	11	0.0191756	0.0489136
K11250..leucine.efflux.protein	1.6197	0.476342	12	12	0.0192448	0.0490564
K02427..cell.division.protein.methyltransferase.FtsJ	1.76974	0.520828	12	12	0.0192943	0.0491152
K12288..pilus.assembly.protein.HofM	1.27255	0.374447	12	10	0.0192828	0.0491152
K01766..cysteine.sulfinate.desulfinase	1.499	0.441403	12	10	0.019335	0.0491629
K02397..flagellar.hook.associated.protein.3.FlgL	1.00931	0.297312	12	10	0.0193603	0.0491629
K05351..D.xylulose.reductase..EC.1.1.1.9.	-3.25298	0.958303	12	9	0.019366	0.0491629
K11924..DtxR.family.transcriptional.regulator..manganese.transport.regulator	1.36212	0.401205	12	12	0.0193545	0.0491629
K00813..aspartate.aminotransferase..EC.2.6.1.1.	1.33547	0.39353	12	12	0.019386	0.0491802
K09972..general.L.amino.acid.transport.system.ATP.binding.protein..EC.3.6.3...	1.15294	0.340242	12	10	0.019491	0.049379
K21084..NO_NAME	0.996663	0.294111	12	10	0.0194882	0.049379
K03737..pyruvate.ferredoxin.flavodoxin.oxidoreductase..EC.1.2.7.1.1.2.7...	1.8829	0.556134	12	12	0.0195525	0.049501
K00099..1.deoxy.D.xylulose.5.phosphate.reductoisomerase..EC.1.1.1.267.	-0.504902	0.149254	12	12	0.0196137	0.0496221
K10972..LysR.family.transcriptional.regulator..transcriptional.activator.of	2.78882	0.824775	12	11	0.0196461	0.0496703
K04013..formate.dependent.nitrite.reductase..penta.haeme.cytochrome.c	1.06114	0.313902	12	10	0.0196643	0.0496823
K08369..MFS.transporter..putative.metabolite.H..symporter	1.07659	0.318945	12	12	0.0197716	0.0499197
K02441..GlpG.protein	1.51701	0.449819	12	9	0.0198358	0.0499797
K04335..minor.curlin.subunit	1.45134	0.430203	12	7	0.0198116	0.0499797
K07592..LysR.family.transcriptional.regulator..tdc.operon.transcriptional	2.0871	0.618773	12	9	0.0198254	0.0499797
K01000..phospho.N.acetylmuramoyl.pentapeptide.transferase..EC.2.7.8.13.	-0.628263	0.186331	12	12	0.0198516	0.0499857
K04026..ethanolamine.utilization.protein.EutL	2.6718	0.793171	12	10	0.0199222	0.0500617
K07674..two.component.system..NarL.family..nitrate.nitrite.sensor.histidine.kinase.NarQ..EC.2.7.13.3.	1.94795	0.578183	12	10	0.0199096	0.0500617
K08348..formate.dehydrogenase.N..alpha.subunit..EC.1.1.5.6.	1.61108	0.478247	12	12	0.0199175	0.0500617
K19338..NO_NAME	1.48998	0.442489	12	9	0.019949	0.0500949
K03453..bile.acid.Na..symporter..BASS.family	-3.01624	0.895996	12	9	0.019969	0.0501115
K01662..1.deoxy.D.xylulose.5.phosphate.synthase..EC.2.2.1.7.	-1.17677	0.34993	12	12	0.0200451	0.0501222
K01803..triosephosphate.isomerase..TIM...EC.5.3.1.1.	-1.76258	0.638151	12	12	0.0200604	0.0501222
K02950..small.subunit.ribosomal.protein.S12	-0.86477	0.313119	12	12	0.0200678	0.0501222
K03674..glutaredoxin.1	2.43743	0.724325	12	10	0.0199962	0.0501222
K05813..sn.glycerol.3.phosphate.transport.system.substrate.binding.protein	1.60845	0.478268	12	11	0.0200407	0.0501222
K18800..2.octaprenylphenol.hydroxylase..EC.1.14.13...	2.39736	0.712761	12	7	0.0200317	0.0501222
K21600..NO_NAME	-2.16121	0.64274	12	11	0.020053	0.0501222
K01684..galactonate.dehydratase..EC.4.2.1.6.	3.51126	1.04671	12	11	0.0202276	0.0503693
K02390..flagellar.hook.protein.FlgE	2.0966	0.624857	12	10	0.0202109	0.0503693
K09903..uridylate.kinase..EC.2.7.4.22.	-0.716121	0.213496	12	12	0.0202345	0.0503693
K13938..dihydromonapterin.reductase...dihydrofolate.reductase..EC.1.5.1...1.5.1.3.	1.23429	0.367974	12	10	0.0202338	0.0503693
K15737..NO_NAME	1.58931	0.473542	12	9	0.0201913	0.0503693
K00009..mannitol.1.phosphate.5.dehydrogenase..EC.1.1.1.17.	1.91496	0.571163	12	12	0.020268	0.0504189
K00427..L.lactate.permease	1.53518	0.45852	12	10	0.0203706	0.0506403
K01087..trehalose.6.phosphate.phosphatase..EC.3.1.3.12.	1.06298	0.317596	12	10	0.0203964	0.0506704
K05815..sn.glycerol.3.phosphate.transport.system.permease.protein	2.0444	0.611074	12	11	0.0204274	0.0506911
K08234..glyoxylase.I.family.protein	1.14949	0.343607	12	10	0.020432	0.0506911
K11927..ATP.dependent.RNA.helicase.RhlE..EC.3.6.4.13.	1.90462	0.569481	12	10	0.0204517	0.050706
K00313..electron.transfer.flavoprotein.quinone.oxidoreductase	1.18984	0.356046	12	10	0.0205114	0.05082
K02835..peptide.chain.release.factor.RF.1	-0.828571	0.248002	12	12	0.0205305	0.0508335
K02485..two.component.system..unclassified.family..response.regulator	0.985348	0.295403	12	12	0.0206518	0.0510997
K00930..acetylglutamate.kinase..EC.2.7.2.8.	-0.956069	0.286826	12	12	0.0207044	0.0511744
K03578..ATP.dependent.helicase.HrpA	1.28086	0.384289	12	12	0.0207095	0.0511744
K01460..glutathionylspermidine.amidase.synthetase..EC.3.5.1.78.6.3.1.8.	1.67725	0.503829	12	9	0.0208016	0.0512995
K02818..PTS.system..trehalose.specific.IIB.component..EC.2.7.1.201.	1.53506	0.461068	12	9	0.0207938	0.0512995
K02819..PTS.system..trehalose.specific.IIC.component	1.53506	0.461068	12	9	0.0207938	0.0512995
K07109..NO_NAME	1.18387	0.355788	12	10	0.0208369	0.0513526
K15555..sulfonate.transport.system.ATP.binding.protein..EC.3.6.3...	1.94916	0.58595	12	11	0.0208592	0.0513733
K02389..flagellar.basal.body.rod.modification.protein.FlgD	2.3486	0.706466	12	9	0.0209062	0.0514549
K04752..nitrogen.regulatory.protein.P.II.2	2.39509	0.720594	12	10	0.0209214	0.0514584
K03672..thioredoxin.2	2.21866	0.667953	12	12	0.0209585	0.0514678
K06206..sugar.fermentation.stimulation.protein.A	1.5211	0.457872	12	11	0.0209598	0.0514678
K22650..NO_NAME	1.44468	0.434909	12	9	0.0209668	0.0514678
K03980..putative.peptidoglycan.lipid.II.flippase	1.53155	0.461211	12	11	0.0209918	0.0514952
K13788..phosphate.acetyltransferase..EC.2.3.1.8.	1.27255	0.384112	12	8	0.0211714	0.0519013
K05526..succinylglutamate.desuccinylase..EC.3.5.1.96.	1.41786	0.428248	12	10	0.021221	0.0519888
K00880..L.xylulokinase..EC.2.7.1.53.	1.56648	0.473627	12	10	0.0213011	0.0521506
K20904..NO_NAME	-2.24484	0.823933	12	5	0.0213929	0.0523408
K00065..2.deoxy.D.gluconate.3.dehydrogenase..EC.1.1.1.125.	2.34206	0.709312	12	9	0.0214311	0.0523996
K01687..dihydroxy.acid.dehydratase..EC.4.2.1.9.	-0.921957	0.279602	12	12	0.0215372	0.0525899
K13954..alcohol.dehydrogenase..EC.1.1.1.1.	1.98456	0.601775	12	9	0.0215265	0.0525899
K07262..D.alanyl.D.alanine.endopeptidase..penicillin.binding.protein.7.	0.909172	0.275789	12	10	0.0215557	0.0526005
K21028..NO_NAME	1.58259	0.480192	12	9	0.0215766	0.0526168
K07284..sortase.A	-1.61404	0.489825	12	12	0.0215908	0.0526169
K10010..cystine.transport.system.ATP.binding.protein..EC.3.6.3...	1.98511	0.602797	12	10	0.021638	0.0526973
K00939..adenylate.kinase..EC.2.7.4.3.	-0.423214	0.128578	12	12	0.0216777	0.0527249
K04083..molecular.chaperone.Hsp33	1.53842	0.467316	12	12	0.0216647	0.0527249
K02565..N.acetylglucosamine.repressor	1.18079	0.358875	12	9	0.0217075	0.0527629
K02460..general.secretion.pathway.protein.K	1.63973	0.498594	12	8	0.0217444	0.0527685
K02550..glycolate.permease	1.49432	0.454506	12	10	0.0217667	0.0527685
K11934..outer.membrane.protein.X	1.08205	0.329105	12	10	0.0217647	0.0527685
K20885..NO_NAME	-1.82783	0.594185	12	5	0.0217661	0.0527685
K13889..glutathione.transport.system.substrate.binding.protein	1.92059	0.584317	12	12	0.021788	0.0527859
K01222..6.phospho.beta.glucosidase..EC.3.2.1.86.	1.33149	0.405328	12	11	0.021834	0.0528284
K02160..acetyl.CoA.carboxylase.biotin.carboxyl.carrier.protein	1.16213	0.353759	12	11	0.0218315	0.0528284
K01915..glutamine.synthetase..EC.6.3.1.2.	-1.18163	0.359937	12	12	0.021885	0.0529049
K16326..NO_NAME	1.18987	0.362491	12	8	0.0218941	0.0529049
K01205..alpha.N.acetylglucosaminidase..EC.3.2.1.50.	-0.868741	0.282898	12	4	0.0219134	0.0529171
K07673..two.component.system..NarL.family..nitrate.nitrite.sensor.histidine.kinase.NarX..EC.2.7.13.3.	0.957573	0.291882	12	10	0.021938	0.052942
K04763..integrase.recombinase.XerD	0.766526	0.233758	12	12	0.0219752	0.0529974
K03321..sulfate.permease..SulP.family	1.13435	0.34609	12	12	0.0220126	0.0530531
K07821..trimethylamine.N.oxide.reductase..cytochrome.c..2..cytochrome.c.type	1.52967	0.467372	12	8	0.0221271	0.0532944
K07121..NO_NAME	2.83014	0.865024	12	10	0.0221557	0.0533289
K09019..3.hydroxypropanoate.dehydrogenase..EC.1.1.1...	1.22712	0.375411	12	9	0.0222296	0.0534719
K07687..two.component.system..NarL.family..captular.synthesis.response.regulator.RcsB	0.965939	0.295625	12	10	0.0222614	0.0535139
K03593..ATP.binding.protein.involved.in.chromosome.partitioning	1.93318	0.592225	12	10	0.0223397	0.0536672
K00016..L.lactate.dehydrogenase..EC.1.1.1.27.	-2.25308	0.690866	12	12	0.0224147	0.05381
K00052..3.isopropylmalate.dehydrogenase..EC.1.1.1.85.	-0.88622	0.271982	12	12	0.022486	0.05381
K00797..spermidine.synthase..EC.2.5.1.16.	1.30292	0.399863	12	12	0.022485	0.05381
K03286..OmpA.OmpF.porin..OOP.family	1.56799	0.481033	12	11	0.0224548	0.05381
K05796..electron.transport.protein.HydN	2.17177	0.666246	12	11	0.0224529	0.05381
K07782..LuxR.family.transcriptional.regulator..quorum.sensing.system.regulator.SdiA	1.56213	0.479378	12	10	0.022479	0.05381
K01448..N.acetylmuramoyl.L.alanine.amidase..EC.3.5.1.28.	1.11497	0.413767	12	12	0.0225181	0.0538175
K12343..3.oxo.5.alpha.steroid.4.dehydrogenase.1..EC.1.3.1.22.	-0.822446	0.269644	12	4	0.0225052	0.0538175
K19591..NO_NAME	1.76016	0.540955	12	9	0.0226004	0.0539793
K12527..putative.selenate.reductase..EC.1.97.1.9.	2.39759	0.73714	12	9	0.0226317	0.0540194
K07113..NO_NAME	1.32164	0.406453	12	9	0.0226544	0.0540388
K09974..hypothetical.protein	1.12214	0.345311	12	7	0.0227047	0.0541239
K01893..asparaginyl.tRNA.synthetase..EC.6.1.1.22.	-1.50754	0.464607	12	12	0.0228283	0.0543837
K05834..homoserine.homoserine.lactone.efflux.protein	1.19884	0.369796	12	10	0.0229011	0.0545221
K05781..putative.phosphonate.transport.system.ATP.binding.protein	1.78242	0.54991	12	7	0.0229162	0.0545233
K01759..lactoylglutathione.lyase..EC.4.4.1.5.	0.818335	0.252603	12	12	0.0229592	0.0545906
K00548..5.methyltetrahydrofolate..homocysteine.methyltransferase..EC.2.1.1.13.	1.93071	0.596749	12	11	0.0230674	0.0548036
K02342..DNA.polymerase.III.subunit.epsilon..EC.2.7.7.7.	-1.07745	0.333124	12	11	0.0230931	0.0548036
K12290..pilus.assembly.protein.HofO	1.65271	0.51095	12	10	0.0230881	0.0548036
K00891..shikimate.kinase..EC.2.7.1.71.	0.57516	0.214928	12	12	0.0232495	0.0549079
K03600..stringent.starvation.protein.B	1.2315	0.38157	12	10	0.0232718	0.0549079
K04077..chaperonin.GroEL	-1.19081	0.369021	12	12	0.0232849	0.0549079
K05786..chloramphenicol.sensitive.protein.RarD	2.09636	0.649308	12	12	0.023242	0.0549079
K07710..two.component.system..NtrC.family..sensor.histidine.kinase.AtoS..EC.2.7.13.3.	1.25389	0.388472	12	10	0.0232639	0.0549079
K07803..zinc.resistance.associated.protein	1.49736	0.463611	12	9	0.0232113	0.0549079
K08304..membrane.bound.lytic.murein.transglycosylase.A	1.294	0.400743	12	10	0.0232319	0.0549079
K11906..type.VI.secretion.system.protein.VasD	2.79898	1.04516	12	6	0.023171	0.0549079
K19221..cob.I.alamin.adenosyltransferase..EC.2.5.1.17.	1.5232	0.471621	12	12	0.0232134	0.0549079
K20541..NO_NAME	2.16954	0.67189	12	9	0.0232315	0.0549079
K02018..molybdate.transport.system.permease.protein	1.86717	0.578924	12	12	0.0233288	0.0549462
K02669..twitching.motility.protein.PilT	1.33274	0.413271	12	10	0.0233391	0.0549462
K03785..3.dehydroquinate.dehydratase.I..EC.4.2.1.10.	1.15242	0.357384	12	11	0.0233455	0.0549462
K01703..3.isopropylmalate..R..2.methylmalate.dehydratase.large.subunit..EC.4.2.1.33.4.2.1.35.	-0.882931	0.274266	12	12	0.0234853	0.0550745
K03150..2.iminoacetate.synthase..EC.4.1.99.19.	-1.60484	0.498443	12	12	0.0234731	0.0550745
K03573..DNA.mismatch.repair.protein.MutH	1.64481	0.510798	12	10	0.0234636	0.0550745
K03971..phage.shock.protein.D	2.06742	0.642234	12	9	0.023489	0.0550745
K05778..putative.thiamine.transport.system.permease.protein	1.59231	0.494449	12	9	0.0234557	0.0550745
K09121..hypothetical.protein	-2.29453	0.859098	12	5	0.0234577	0.0550745
K03642..rare.lipoprotein.A	0.468275	0.145584	12	10	0.0235568	0.055164
K08168..MFS.transporter..DHA2.family..metal.tetracycline.proton.antiporter	-1.84478	0.573453	12	10	0.0235453	0.055164
K04073..acetaldehyde.dehydrogenase..EC.1.2.1.10.	1.00357	0.31219	12	9	0.0236071	0.055212
K15836..NO_NAME	1.77936	0.55345	12	10	0.0235958	0.055212
K00147..glutamate.5.semialdehyde.dehydrogenase..EC.1.2.1.41.	-1.13044	0.423981	12	12	0.0236443	0.0552643
K00134..glyceraldehyde.3.phosphate.dehydrogenase..EC.1.2.1.12.	0.813971	0.253613	12	12	0.0237422	0.0554581
K07153..NO_NAME	1.52512	0.475733	12	9	0.0238395	0.0556505
K03638..molybdenum.cofactor.biosynthesis.protein.B	1.2773	0.398612	12	12	0.0238781	0.0557057
K21739..NO_NAME	1.83368	0.572353	12	10	0.0238948	0.0557095
K07085..NO_NAME	-0.810972	0.253315	12	12	0.0239567	0.0557839
K11381..2.oxoisovalerate.dehydrogenase.E1.component..EC.1.2.4.4.	-0.860274	0.286587	12	4	0.0239499	0.0557839
K21021..NO_NAME	1.50174	0.469217	12	9	0.0239813	0.055806
K05801..DnaJ.like.chaperone.protein	0.500207	0.15642	12	12	0.0240529	0.0559378
K03408..purine.binding.chemotaxis.protein.CheW	1.85948	0.582134	12	12	0.02415	0.0560933
K19611..ferric.enterobactin.receptor	1.823	0.570646	12	10	0.0241396	0.0560933
K21089..NO_NAME	1.69588	0.531266	12	9	0.0242069	0.0561903
K08224..MFS.transporter..YNFM.family..putative.membrane.transport.protein	1.33354	0.418029	12	9	0.0242633	0.0562859
K03077..L.ribulose.5.phosphate.4.epimerase..EC.5.1.3.4.	0.51369	0.161151	12	12	0.0243295	0.0562915
K14170..chorismate.mutase...prephenate.dehydratase..EC.5.4.99.5.4.2.1.51.	0.724976	0.22742	12	10	0.0243242	0.0562915
K14347..NO_NAME	1.20642	0.37852	12	10	0.0243414	0.0562915
K14977...S..ureidoglycine.aminohydrolase..EC.3.5.3.26.	1.55693	0.488187	12	12	0.0242864	0.0562915
K20492..lantibiotic.transport.system.permease.protein	-1.55756	0.488525	12	12	0.0243116	0.0562915
K01154..type.I.restriction.enzyme..S.subunit	-2.55264	0.801358	12	11	0.0243904	0.0563549
K03813..molybdenum.transport.protein	1.02844	0.322892	12	9	0.0243992	0.0563549
K03790..ribosomal.protein.alanine.N.acetyltransferase	1.4237	0.447452	12	12	0.0244891	0.0564572
K06074..vitamin.B12.transport.system.ATP.binding.protein..EC.3.6.3.33.	1.38635	0.435681	12	9	0.0244826	0.0564572
K07644..two.component.system..OmpR.family..heavy.metal.sensor.histidine.kinase.CusS..EC.2.7.13.3.	1.23714	0.388786	12	9	0.0244818	0.0564572
K00645...acyl.carrier.protein..S.malonyltransferase..EC.2.3.1.39.	1.34162	0.422093	12	12	0.0245797	0.0566179
K21948..NO_NAME	1.61041	0.506713	12	8	0.0245893	0.0566179
K00374..nitrate.reductase.gamma.subunit..EC.1.7.5.1.1.7.99.4.	1.87074	0.589206	12	12	0.0246756	0.056711
K06077..outer.membrane.lipoprotein.SlyB	1.4309	0.450639	12	9	0.0246689	0.056711
K09894..hypothetical.protein	1.81745	0.572328	12	9	0.0246611	0.056711
K09906..hypothetical.protein	1.33037	0.419166	12	10	0.0247077	0.0567498
K09024..flavin.reductase..EC.1.5.1...	1.26143	0.397618	12	9	0.0247466	0.0567689
K18997..NO_NAME	1.00233	0.315911	12	10	0.0247363	0.0567689
K05591..ATP.independent.RNA.helicase.DbpA	1.81979	0.573814	12	9	0.0247763	0.056802
K00831..phosphoserine.aminotransferase..EC.2.6.1.52.	-0.503117	0.158808	12	12	0.0248682	0.0569434
K02784..phosphocarrier.protein.HPr	1.73657	0.548146	12	12	0.0248687	0.0569434
K07447..putative.holliday.junction.resolvase	0.320658	0.101273	12	12	0.0249191	0.0570237
K00245..fumarate.reductase.iron.sulfur.subunit..EC.1.3.5.4.	1.22124	0.386002	12	10	0.0249878	0.0571457
K05808..putative.sigma.54.modulation.protein	0.907878	0.287269	12	12	0.0250845	0.0572963
K13829..shikimate.kinase...3.dehydroquinate.synthase..EC.2.7.1.71.4.2.3.4.	-2.37869	0.75265	12	8	0.0250832	0.0572963
K04095..cell.filamentation.protein	0.59513	0.188446	12	10	0.0251488	0.0574079
K02568..cytochrome.c.type.protein.NapB	1.79494	0.568803	12	9	0.0252182	0.0575309
K00979..3.deoxy.manno.octulosonate.cytidylyltransferase..CMP.KDO.synthetase...EC.2.7.7.38.	0.50805	0.16106	12	12	0.0252531	0.0575753
K01666..4.hydroxy.2.oxovalerate.aldolase..EC.4.1.3.39.	1.27196	0.403519	12	9	0.0253172	0.0576639
K08320..CTP.pyrophosphohydrolase	1.46672	0.465336	12	10	0.0253231	0.0576639
K00876..uridine.kinase..EC.2.7.1.48.	-0.858409	0.272442	12	12	0.0253563	0.0577042
K07643..two.component.system..OmpR.family..sensor.histidine.kinase.BasS..EC.2.7.13.3.	2.20238	0.699736	12	11	0.0254522	0.057887
K02911..large.subunit.ribosomal.protein.L32	-0.965996	0.307042	12	12	0.0254894	0.0579362
K01819..galactose.6.phosphate.isomerase..EC.5.3.1.26.	-3.48543	1.10808	12	9	0.0255083	0.0579436
K03759..arginine.agmatine.antiporter	2.0666	0.657394	12	12	0.0255617	0.0579939
K09923..hypothetical.protein	0.961317	0.305769	12	9	0.025553	0.0579939
K01689..enolase..EC.4.2.1.11.	-0.584194	0.185911	12	12	0.0255989	0.0580343
K07387..putative.metalloprotease	1.33575	0.425136	12	10	0.0256107	0.0580343
K07471..hypothetical.protein	1.23479	0.393107	12	8	0.0256349	0.0580536
K00606..3.methyl.2.oxobutanoate.hydroxymethyltransferase..EC.2.1.2.11.	-1.06803	0.340133	12	12	0.025665	0.0580864
K16136..NO_NAME	2.26808	0.722652	12	9	0.0257084	0.0581491
K00228..coproporphyrinogen.III.oxidase..EC.1.3.3.3.	1.57933	0.50347	12	12	0.0257563	0.0582222
K02752..PTS.system..beta.glucoside..arbutin.salicin.cellobiose..specific.IIB.component..EC.2.7.1...	1.51085	0.481842	12	10	0.0257951	0.058239
K02753..PTS.system..beta.glucoside..arbutin.salicin.cellobiose..specific.IIC.component	1.51085	0.481842	12	10	0.0257951	0.058239
K00040..fructuronate.reductase..EC.1.1.1.57.	1.66878	0.532342	12	11	0.0258177	0.0582545
K07251..thiamine.kinase..EC.2.7.1.89.	1.8297	0.583962	12	11	0.0258622	0.0583195
K19507..PTS.system..fructoselysine.glucoselysine.specific.IIB.component..EC.2.7.1...	-1.74816	0.558179	12	8	0.025902	0.0583739
K01034..acetate.CoA.acetoacetate.CoA.transferase.alpha.subunit..EC.2.8.3.8.2.8.3.9.	1.69582	0.541567	12	9	0.0259186	0.0583759
K12266..anaerobic.nitric.oxide.reductase.transcription.regulator	1.9977	0.638324	12	12	0.0259691	0.0584188
K18142..NO_NAME	1.57965	0.504671	12	10	0.0259561	0.0584188
K06403..stage.V.sporulation.protein.AA	-1.06951	0.364001	12	4	0.0260031	0.0584599
K15583..oligopeptide.transport.system.ATP.binding.protein	2.58996	0.828215	12	11	0.0260406	0.0585087
K08163..MFS.transporter..DHA1.family..multidrug.resistance.protein	1.13706	0.364186	12	10	0.0261868	0.0587912
K11249..cysteine.O.acetylserine.efflux.protein	0.874036	0.279976	12	8	0.026198	0.0587912
K00239..succinate.dehydrogenase...fumarate.reductase..flavoprotein.subunit..EC.1.3.5.1.1.3.5.4.	1.11466	0.357187	12	12	0.0262325	0.0588331
K02371..enoyl..acyl.carrier.protein..reductase.II..EC.1.3.1.9.	-1.73321	0.665356	12	5	0.0262679	0.0588573
K10108..maltose.maltodextrin.transport.system.substrate.binding.protein	0.744679	0.238738	12	6	0.026275	0.0588573
K11930..periplasmic.protein.TorT	1.32282	0.424219	12	10	0.026304	0.0588868
K05966..triphosphoribosyl.dephospho.CoA.synthase..EC.2.4.2.52.	1.16775	0.374807	12	10	0.0263832	0.0590285
K01153..type.I.restriction.enzyme..R.subunit	-2.29801	0.737863	12	11	0.0264187	0.0590367
K07497..putative.transposase	1.36268	0.437538	12	12	0.0264182	0.0590367
K05844..ribosomal.protein.S6.modification.protein	1.12066	0.359959	12	12	0.0264518	0.0590751
K01224..arabinogalactan.endo.1.4.beta.galactosidase	-2.43477	0.782757	12	9	0.0265357	0.0591558
K01629..rhamnulose.1.phosphate.aldolase..EC.4.1.2.19.	0.789899	0.253926	12	12	0.0265284	0.0591558
K13635..NO_NAME	2.65873	0.854659	12	11	0.0265247	0.0591558
K02386..flagella.basal.body.P.ring.formation.protein.FlgA	1.56292	0.502901	12	10	0.026617	0.0593014
K03490..AraC.family.transcriptional.regulator..cel.operon.repressor	2.18868	0.704682	12	8	0.0266738	0.0593925
K03582..exodeoxyribonuclease.V.beta.subunit..EC.3.1.11.5.	2.12654	0.684946	12	10	0.026711	0.0594396
K07459..putative.ATP.dependent.endonuclease.of.the.OLD.family	2.10565	0.678347	12	10	0.026729	0.059444
K03856..3.deoxy.7.phosphoheptulonate.synthase..EC.2.5.1.54.	-2.23262	0.720415	12	5	0.0268814	0.0597471
K08351..biotin.methionine.sulfoxide.reductase..EC.1.......	1.47695	0.476702	12	9	0.0269057	0.0597654
K09969..general.L.amino.acid.transport.system.substrate.binding.protein	1.95044	0.629924	12	12	0.0269659	0.0598633
K19709..acetate.CoA.transferase..EC.2.8.3.8.	1.66273	0.537313	12	11	0.0270203	0.0599484
K02364..enterobactin.synthetase.component.F..EC.6.3.2.14.	2.28775	0.739584	12	9	0.0270581	0.0599963
K13684..NO_NAME	2.78598	0.900862	12	9	0.0270803	0.0600098
K02395..flagellar.protein.FlgJ	1.11663	0.361297	12	10	0.0271407	0.0600166
K03625..N.utilization.substance.protein.B	0.922229	0.298525	12	12	0.0271816	0.0600166
K03675..glutaredoxin.2	1.35855	0.439745	12	10	0.0271776	0.0600166
K03746..DNA.binding.protein.H.NS	1.34856	0.436229	12	9	0.0271164	0.0600166
K08368..MFS.transporter..putative.metabolite.transport.protein	1.50616	0.487675	12	10	0.0272074	0.0600166
K10542..methyl.galactoside.transport.system.ATP.binding.protein..EC.3.6.3.17.	1.31374	0.424955	12	12	0.0271135	0.0600166
K11737..D.serine.D.alanine.glycine.transporter	2.55094	0.826149	12	11	0.0272288	0.0600166
K13480..xanthine.dehydrogenase.iron.sulfur.binding.subunit	1.24375	0.4028	12	9	0.0272285	0.0600166
K20534..NO_NAME	-1.33166	0.515333	12	7	0.0272252	0.0600166
K03544..ATP.dependent.Clp.protease.ATP.binding.subunit.ClpX	-1.31163	0.425377	12	12	0.0273621	0.0602388
K07223..putative.iron.dependent.peroxidase	2.09956	0.680848	12	9	0.027353	0.0602388
K00684..leucyl.phenylalanyl.tRNA..protein.transferase	0.828657	0.268927	12	11	0.0274278	0.0603477
K02065..phospholipid.cholesterol.gamma.HCH.transport.system.ATP.binding.protein	0.728816	0.236833	12	12	0.0275526	0.0605148
K02554..2.keto.4.pentenoate.hydratase..EC.4.2.1.80.	1.38107	0.448775	12	9	0.02755	0.0605148
K08310..dihydroneopterin.triphosphate.diphosphatase..EC.3.6.1.67.	1.34189	0.43597	12	10	0.0275338	0.0605148
K01173..endonuclease.G..mitochondrial	-1.06508	0.368238	12	4	0.0275881	0.060557
K18955..NO_NAME	-2.21719	0.72095	12	11	0.0276145	0.0605789
K00219..2.4.dienoyl.CoA.reductase..NADPH2.	1.43936	0.468157	12	7	0.0276409	0.0606012
K03411..chemotaxis.protein.CheD..EC.3.5.1.44.	-0.916278	0.317121	12	4	0.0277243	0.0607481
K01843..lysine.2.3.aminomutase..EC.5.4.3.2.	-0.986149	0.341387	12	4	0.0277725	0.0608178
K02071..D.methionine.transport.system.ATP.binding.protein	1.25513	0.409163	12	11	0.0278611	0.060976
K06960..NO_NAME	-1.40681	0.458745	12	11	0.0278898	0.0610028
K00658..2.oxoglutarate.dehydrogenase.E2.component..dihydrolipoamide.succinyltransferase...EC.2.3.1.61.	1.38781	0.452828	12	12	0.0279501	0.0610987
K00758..thymidine.phosphorylase..EC.2.4.2.4.	0.957731	0.312785	12	8	0.0280398	0.0612587
K07810..Cu.I..Ag.I..efflux.system.periplasmic.protein.CusF	1.57777	0.515445	12	8	0.0280702	0.0612891
K00885..N.acylmannosamine.kinase..EC.2.7.1.60.	1.29371	0.422717	12	10	0.0280869	0.0612896
K21087..NO_NAME	3.40016	1.11318	12	8	0.0282806	0.0616759
K02458..general.secretion.pathway.protein.I	1.46171	0.479064	12	9	0.0283861	0.0618698
K03517..quinolinate.synthase..EC.2.5.1.72.	0.948644	0.311183	12	12	0.0284729	0.0620224
K04744..LPS.assembly.protein	1.47978	0.485578	12	10	0.0285066	0.0620596
K07334..proteic.killer.suppression.protein	1.00084	0.328589	12	10	0.0285587	0.0621365
K03818..putative.colanic.acid.biosynthesis.acetyltransferase.WcaF	0.892529	0.293192	12	9	0.0286138	0.0621453
K11744..AI.2.transport.protein.TqsA	1.70807	0.561185	12	9	0.0286297	0.0621453
K16693..NO_NAME	1.73201	0.568838	12	9	0.0285926	0.0621453
K21746..NO_NAME	1.07537	0.353237	12	10	0.0286085	0.0621453
K00130..betaine.aldehyde.dehydrogenase..EC.1.2.1.8.	1.72396	0.675241	12	9	0.028711	0.0622039
K08680..2.succinyl.6.hydroxy.2.4.cyclohexadiene.1.carboxylate.synthase..EC.4.2.99.20.	1.87533	0.616649	12	11	0.0287128	0.0622039
K10440..ribose.transport.system.permease.protein	1.91066	0.628355	12	11	0.0287267	0.0622039
K14274..D.xylonolactonase	-1.1876	0.415163	12	4	0.0287404	0.0622039
K16291..NO_NAME	1.10609	0.363709	12	10	0.0287135	0.0622039
K02510..4.hydroxy.2.oxoheptanedioate.aldolase..EC.4.1.2.52.	2.31951	0.763211	12	5	0.028779	0.0622511
K02017..molybdate.transport.system.ATP.binding.protein..EC.3.6.3.29.	0.986301	0.325072	12	12	0.0289453	0.0625744
K19777..NO_NAME	0.905133	0.298392	12	10	0.0289695	0.0625904
K02069..putative.ABC.transport.system.permease.protein	0.357891	0.118044	12	12	0.02902	0.0626265
K18014..3.aminobutyryl.CoA.ammonia.lyase..EC.4.3.1.14.	-2.16256	0.713274	12	5	0.0290188	0.0626265
K02336..DNA.polymerase.II	2.15443	0.711071	12	9	0.029087	0.0626619
K03695..ATP.dependent.Clp.protease.ATP.binding.subunit.ClpB	-1.51879	0.501223	12	12	0.0290759	0.0626619
K17680..NO_NAME	-1.26243	0.442487	12	4	0.0290591	0.0626619
K21906..NO_NAME	1.27931	0.422599	12	8	0.0291734	0.0628115
K03074..preprotein.translocase.subunit.SecF	1.03722	0.342801	12	10	0.0292246	0.0628854
K03118..sec.independent.protein.translocase.protein.TatC	1.13215	0.374311	12	12	0.0292607	0.0628901
K07390..monothiol.glutaredoxin	1.13072	0.373808	12	11	0.0292524	0.0628901
K03079..L.ribulose.5.phosphate.3.epimerase..EC.5.1.3.22.	2.28072	0.75488	12	11	0.0293724	0.0629844
K03825..putative.acetyltransferase	2.43145	0.80442	12	8	0.0293284	0.0629844
K10011..UDP.4.amino.4.deoxy.L.arabinose.formyltransferase...UDP.glucuronic.acid.dehydrogenase..UDP.4.keto.hexauronic.acid.decarboxylating...EC.2.1.2.13.1.1.1.305.	2.31509	0.766162	12	9	0.0293598	0.0629844
K21905..NO_NAME	0.831689	0.275203	12	9	0.0293457	0.0629844
K03281..chloride.channel.protein..CIC.family	0.671783	0.222417	12	12	0.0294036	0.0630151
K01252..bifunctional.isochorismate.lyase...aryl.carrier.protein..EC.3.3.2.1.6.3.2.14.	1.18601	0.392873	12	10	0.0294562	0.0630912
K01609..indole.3.glycerol.phosphate.synthase..EC.4.1.1.48.	-2.8027	0.928721	12	5	0.0294905	0.0631283
K01887..arginyl.tRNA.synthetase..EC.6.1.1.19.	-1.28553	0.42618	12	12	0.029538	0.0631572
K06157..Gnt.II.system.L.idonate.transporter	1.40529	0.465827	12	7	0.029526	0.0631572
UNGROUPED	0.157125	0.0521075	12	12	0.029572	0.0631936
K03070..preprotein.translocase.subunit.SecA	-1.21371	0.402678	12	12	0.0296161	0.0632307
K07461..putative.endonuclease	1.65436	0.548915	12	11	0.0296235	0.0632307
K11743..spermidine.export.protein.MdtJ	1.96537	0.652362	12	9	0.0296635	0.0632435
K13243..NO_NAME	1.93729	0.642983	12	9	0.0296543	0.0632435
K07048..NO_NAME	1.43672	0.477883	12	8	0.0298777	0.0636636
K01006..pyruvate..orthophosphate.dikinase..EC.2.7.9.1.	-3.23345	1.07624	12	7	0.0299471	0.0637385
K06212..formate.transporter	1.50154	0.499777	12	10	0.0299468	0.0637385
K02423..flagellar.protein.FliT	1.68916	0.562587	12	9	0.0300133	0.063815
K17836..beta.lactamase.class.A..EC.3.5.2.6.	-2.45152	0.816529	12	10	0.0300174	0.063815
K03521..electron.transfer.flavoprotein.beta.subunit	2.46564	0.821588	12	12	0.030102	0.0639215
K08313..fructose.6.phosphate.aldolase.1	1.41317	0.471055	12	10	0.0300991	0.0639215
K07237..tRNA.2.thiouridine.synthesizing.protein.B	1.03839	0.346321	12	10	0.0301564	0.0640004
K06159..putative.ATP.binding.cassette.transporter	1.99063	0.664308	12	10	0.0302193	0.0640607
K11472..glycolate.oxidase.FAD.binding.subunit	1.34784	0.449761	12	9	0.0302103	0.0640607
K02411..flagellar.assembly.protein.FliH	2.04155	0.681538	12	8	0.0302553	0.0641002
K06333..spore.coat.protein.JB	-1.3508	0.451017	12	6	0.0302724	0.0641002
K02392..flagellar.basal.body.rod.protein.FlgG	1.40676	0.470162	12	12	0.0303745	0.0642088
K03551..holliday.junction.DNA.helicase.RuvB..EC.3.6.4.12.	-1.52054	0.508125	12	12	0.0303614	0.0642088
K07062..NO_NAME	-2.7668	0.924716	12	8	0.0303756	0.0642088
K01138..NO_NAME	0.923377	0.308755	12	9	0.0304246	0.0642392
K07080..NO_NAME	-2.56477	0.857578	12	5	0.0304225	0.0642392
K09909..hypothetical.protein	1.58925	0.531533	12	9	0.0304496	0.0642555
K13893..microcin.C.transport.system.substrate.binding.protein	1.81676	0.608006	12	9	0.0305151	0.0643572
K00068..sorbitol.6.phosphate.2.dehydrogenase..EC.1.1.1.140.	2.00122	0.671447	12	10	0.0307839	0.0648505
K07685..two.component.system..NarL.family..nitrate.nitrite.response.regulator.NarP	1.05634	0.354398	12	11	0.0307768	0.0648505
K03207..colanic.acid.biosynthesis.protein.WcaH	2.02758	0.680788	12	9	0.0308607	0.0649698
K11531..lsr.operon.transcriptional.repressor	0.97825	0.328506	12	6	0.0308755	0.0649698
K09815..zinc.transport.system.substrate.binding.protein	-1.61985	0.6453	12	12	0.0309003	0.0649852
K01810..glucose.6.phosphate.isomerase..EC.5.3.1.9.	-1.09999	0.369806	12	12	0.0309958	0.0651123
K05779..putative.thiamine.transport.system.ATP.binding.protein	1.30084	0.437303	12	7	0.0309894	0.0651123
K01999..branched.chain.amino.acid.transport.system.substrate.binding.protein	0.600852	0.202091	12	12	0.0310429	0.0651742
K01599..uroporphyrinogen.decarboxylase..EC.4.1.1.37.	0.890294	0.299624	12	12	0.031108	0.0652741
K00782..hypothetical.protein	-2.08803	0.703087	12	9	0.0311643	0.0653185
K08659..dipeptidase.A	-1.75706	0.591582	12	9	0.031153	0.0653185
K01026..propionate.CoA.transferase..EC.2.8.3.1.	-2.07712	0.699643	12	6	0.0311994	0.0653206
K19416..NO_NAME	1.92588	0.648708	12	11	0.0312005	0.0653206
K09902..hypothetical.protein	1.17529	0.396041	12	10	0.0312433	0.0653538
K21672..NO_NAME	-1.60899	0.542225	12	10	0.0312516	0.0653538
K02968..small.subunit.ribosomal.protein.S20	-0.524771	0.209729	12	12	0.0313319	0.0654842
K03445..MFS.transporter..DHA1.family..purine.ribonucleoside.efflux.pump	1.90339	0.642022	12	10	0.0313492	0.0654842
K01709..CDP.glucose.4.6.dehydratase..EC.4.2.1.45.	-1.1286	0.403882	12	4	0.0314117	0.065541
K21637..NO_NAME	1.5875	0.535731	12	10	0.0314008	0.065541
K08217..MFS.transporter..DHA3.family..macrolide.efflux.protein	-2.16953	0.73236	12	9	0.0314322	0.0655469
K14062..NO_NAME	1.21934	0.411809	12	10	0.0314851	0.0656204
K06165..alpha.D.ribose.1.methylphosphonate.5.triphosphate.synthase.subunit.PhnH..EC.2.7.8.37.	1.77848	0.60115	12	10	0.0315747	0.0657703
K06203..CysZ.protein	1.49698	0.5062	12	9	0.0316178	0.0658231
K02394..flagellar.P.ring.protein.precursor.FlgI	1.19127	0.402897	12	8	0.0316372	0.0658266
K02688..transcriptional.regulator..propionate.catabolism.operon.regulatory	1.47196	0.498027	12	9	0.0316802	0.0658792
K19225..NO_NAME	-1.38057	0.495726	12	4	0.0318115	0.0661152
K02012..iron.III..transport.system.substrate.binding.protein	2.66438	0.902895	12	7	0.0318509	0.06616
K10556..AI.2.transport.system.permease.protein	0.89253	0.302779	12	6	0.031967	0.0662901
K21741..NO_NAME	1.49937	0.508579	12	9	0.0319538	0.0662901
K22719..NO_NAME	0.887082	0.300842	12	7	0.0319349	0.0662901
K09712..hypothetical.protein	1.87897	0.637535	12	8	0.0319872	0.066295
K00864..glycerol.kinase..EC.2.7.1.30.	1.15447	0.391884	12	12	0.0320348	0.0663196
K01295..glutamate.carboxypeptidase	-2.93348	0.995601	12	5	0.0320171	0.0663196
K01671..NO_NAME	1.41533	0.481018	12	9	0.0321686	0.0663378
K03455..monovalent.cation.H..antiporter.2..CPA2.family	0.696695	0.236748	12	12	0.0321533	0.0663378
K03719..Lrp.AsnC.family.transcriptional.regulator..leucine.responsive	0.789195	0.268068	12	12	0.0321073	0.0663378
K07661..two.component.system..OmpR.family..response.regulator.RstA	1.24989	0.424724	12	9	0.0321514	0.0663378
K10540..methyl.galactoside.transport.system.substrate.binding.protein	1.71167	0.581516	12	11	0.0321276	0.0663378
K10914..CRP.FNR.family.transcriptional.regulator..cyclic.AMP.receptor.protein	2.4915	1.0015	12	11	0.0321134	0.0663378
K21972..NO_NAME	1.30642	0.443888	12	10	0.0321403	0.0663378
K20862..NO_NAME	1.36191	0.463266	12	10	0.0322641	0.0664955
K21063..NO_NAME	-1.35948	0.490234	12	4	0.0322809	0.0664955
K03319..divalent.anion.Na..symporter..DASS.family	1.57501	0.536108	12	12	0.0323367	0.0665735
K00598..trans.aconitate.2.methyltransferase	1.22694	0.417716	12	5	0.0323588	0.066582
K07792..anaerobic.C4.dicarboxylate.transporter.DcuB	1.01127	0.344758	12	12	0.0325095	0.0668552
K00244..fumarate.reductase.flavoprotein.subunit..EC.1.3.5.4.	1.18985	0.405787	12	12	0.0325481	0.0668975
K01560..2.haloacid.dehalogenase..EC.3.8.1.2.	-0.891796	0.322346	12	4	0.0325672	0.0668996
K04487..cysteine.desulfurase..EC.2.8.1.7.	1.30979	0.446987	12	12	0.0326227	0.0669482
K11735..GABA.permease	1.80621	0.616421	12	8	0.0326269	0.0669482
K10778..AraC.family.transcriptional.regulator..regulatory.protein.of	1.50148	0.512686	12	8	0.032684	0.0670284
K02759..PTS.system..cellobiose.specific.IIA.component..EC.2.7.1.196.2.7.1.205.	1.37379	0.469289	12	8	0.032732	0.0670897
K00027..malate.dehydrogenase..oxaloacetate.decarboxylating...EC.1.1.1.38.	1.52919	0.522648	12	12	0.0327901	0.0671718
K01520..dUTP.pyrophosphatase..EC.3.6.1.23.	-0.866996	0.296485	12	12	0.0328514	0.0672164
K07714..two.component.system..NtrC.family..response.regulator.AtoC	1.388	0.474853	12	10	0.0328987	0.0672164
K08717..urea.transporter	-1.28776	0.466638	12	4	0.0328804	0.0672164
K13069..NO_NAME	1.12841	0.386055	12	10	0.0329024	0.0672164
K15581..oligopeptide.transport.system.permease.protein	1.11464	0.381317	12	12	0.0328943	0.0672164
K02881..large.subunit.ribosomal.protein.L18	-0.574348	0.196543	12	12	0.0329273	0.0672303
K03710..GntR.family.transcriptional.regulator	-1.5416	0.527671	12	9	0.0329557	0.0672514
K03688..ubiquinone.biosynthesis.protein	1.1761	0.40299	12	12	0.0330738	0.0674183
K07735..putative.transcriptional.regulator	0.582229	0.199472	12	12	0.033058	0.0674183
K00230..menaquinone.dependent.protoporphyrinogen.oxidase..EC.1.3.5.3.	1.28767	0.441529	12	9	0.0331526	0.0674679
K03774..FKBP.type.peptidyl.prolyl.cis.trans.isomerase.SlpA	1.50785	0.516874	12	9	0.0331193	0.0674679
K03819..putative.colanic.acid.biosynthesis.acetyltransferase.WcaB	1.39768	0.479197	12	9	0.0331402	0.0674679
K08324..succinate.semialdehyde.dehydrogenase..EC.1.2.1.16.1.2.1.24.	1.59167	0.546246	12	7	0.033251	0.067631
K03613..electron.transport.complex.protein.RnfE	0.980952	0.336876	12	12	0.0333256	0.0676495
K07715..two.component.system..NtrC.family..response.regulator.GlrR	1.48083	0.508455	12	10	0.0333064	0.0676495
K18843..NO_NAME	1.04184	0.357808	12	9	0.033333	0.0676495
K21973..NO_NAME	0.784251	0.269248	12	10	0.0332931	0.0676495
K22720..NO_NAME	1.13099	0.388644	12	9	0.0333957	0.0677399
K01611..S.adenosylmethionine.decarboxylase..EC.4.1.1.50.	3.70938	1.27627	12	10	0.0335388	0.0679559
K02483..two.component.system..OmpR.family..response.regulator	1.69344	0.582574	12	10	0.0335235	0.0679559
K01699..propanediol.dehydratase.large.subunit..EC.4.2.1.28.	1.11706	0.384568	12	8	0.0336056	0.0680542
K07701..two.component.system..CitB.family..sensor.histidine.kinase.DcuS..EC.2.7.13.3.	1.54141	0.531621	12	9	0.0338126	0.0684359
K01483..ureidoglycolate.lyase..EC.4.3.2.3.	1.19789	0.413247	12	9	0.0338412	0.0684566
K07038..NO_NAME	1.34568	0.464495	12	10	0.033906	0.0685503
K03702..excinuclease.ABC.subunit.B	-0.846355	0.292384	12	12	0.0340011	0.0687052
K13038..phosphopantothenoylcysteine.decarboxylase...phosphopantothenate..cysteine.ligase..EC.4.1.1.36.6.3.2.5.	0.984094	0.340108	12	10	0.0340487	0.0687265
K16138..NO_NAME	1.37548	0.475295	12	10	0.0340302	0.0687265
K00957..sulfate.adenylyltransferase.subunit.2..EC.2.7.7.4.	-1.92023	0.663755	12	12	0.0340686	0.0687293
K03700..recombination.protein.U	-1.44223	0.528339	12	4	0.034185	0.0689269
K03742..nicotinamide.nucleotide.amidase..EC.3.5.1.42.	-1.05152	0.385531	12	4	0.0342676	0.0689437
K03895..aerobactin.synthase..EC.6.3.2.39.	0.958601	0.331882	12	6	0.0342516	0.0689437
K07319..putative.adenine.specific.DNA.methyltransferase	1.56177	0.54063	12	11	0.0342349	0.0689437
K22396..NO_NAME	0.925425	0.320356	12	6	0.0342369	0.0689437
K15876..cytochrome.c.nitrite.reductase.small.subunit	-1.06555	0.39037	12	4	0.0342884	0.0689482
K16370..6.phosphofructokinase.2..EC.2.7.1.11.	0.932088	0.323028	12	9	0.0343678	0.0690704
K08277..transcriptional.activator.CaiF	1.14001	0.395223	12	10	0.034408	0.0691137
K00096..glycerol.1.phosphate.dehydrogenase..NAD.P.....EC.1.1.1.261.	-1.11135	0.408239	12	4	0.0345138	0.069284
K10680..N.ethylmaleimide.reductase..EC.1.......	1.47355	0.511393	12	10	0.0345301	0.069284
K08154..MFS.transporter..DHA1.family..2.module.integral.membrane.pump.EmrD	1.65555	0.575589	12	10	0.0347391	0.0696657
K01185..lysozyme	2.13709	0.744291	12	10	0.0349409	0.0700326
K07787..Cu.I..Ag.I..efflux.system.membrane.protein.CusA.SilA	1.9972	0.696041	12	9	0.0350204	0.0701542
K00226..dihydroorotate.dehydrogenase..fumarate...EC.1.3.98.1.	-1.46474	0.540129	12	4	0.0350426	0.0701607
K05349..beta.glucosidase..EC.3.2.1.21.	-1.08632	0.3789	12	12	0.0351157	0.0702693
K13059..NO_NAME	-2.0708	0.723463	12	9	0.0353095	0.070619
K03187..urease.accessory.protein	0.984875	0.344157	12	5	0.0353359	0.0706338
K01495..GTP.cyclohydrolase.I..EC.3.5.4.16.	-0.603323	0.210978	12	12	0.0354212	0.0706901
K02029..polar.amino.acid.transport.system.permease.protein	-1.20545	0.421509	12	12	0.0354128	0.0706901
K21638..NO_NAME	1.25606	0.439178	12	5	0.0354053	0.0706901
K06447..succinylglutamic.semialdehyde.dehydrogenase..EC.1.2.1.71.	2.27744	0.796778	12	8	0.0354768	0.070763
K01664..para.aminobenzoate.synthetase.component.II..EC.2.6.1.85.	1.59097	0.557012	12	10	0.0355619	0.0707747
K03291..MFS.transporter..SET.family..sugar.efflux.transporter	2.02615	0.709014	12	12	0.035502	0.0707747
K11477..glc.operon.protein.GlcG	1.42321	0.498268	12	9	0.0355592	0.0707747
K12574..ribonuclease.J..EC.3.1.....	-1.05145	0.368003	12	10	0.0355242	0.0707747
K13381..bifunctional.chitinase.lysozyme..EC.3.2.1.14.3.2.1.17.	0.649888	0.227598	12	8	0.035597	0.0707747
K15268..NO_NAME	1.88228	0.659194	12	9	0.0355969	0.0707747
K02435..aspartyl.tRNA.Asn..glutamyl.tRNA.Gln..amidotransferase.subunit.C..EC.6.3.5.6.6.3.5.7.	-2.07262	0.726677	12	12	0.0357322	0.0709066
K02456..general.secretion.pathway.protein.G	0.744619	0.26107	12	8	0.0357321	0.0709066
K03668..heat.shock.protein.HslJ	1.66688	0.584277	12	10	0.0357024	0.0709066
K06962..NO_NAME	-1.86018	0.652445	12	10	0.0357779	0.0709066
K07313..serine.threonine.protein.phosphatase.1	0.920225	0.32274	12	10	0.0357696	0.0709066
K10551..D.allose.transport.system.ATP.binding.protein..EC.3.6.3.17.	1.39583	0.489547	12	8	0.0357708	0.0709066
K09890..hypothetical.protein	1.20045	0.421491	12	10	0.0359038	0.0711182
K02913..large.subunit.ribosomal.protein.L33	-2.42204	0.850637	12	12	0.0359361	0.0711443
K18205..NO_NAME	-1.28992	0.45315	12	10	0.0359682	0.0711698
K11216..autoinducer.2..AI.2..kinase	1.35056	0.474863	12	6	0.0360727	0.0712627
K12962..undecaprenyl.phosphate.alpha.L.ara4N.flippase.subunit.ArnE	2.1363	0.751045	12	8	0.036058	0.0712627
K21908..NO_NAME	1.20211	0.422648	12	9	0.036067	0.0712627
K01449..N.acetylmuramoyl.L.alanine.amidase	-1.06254	0.395797	12	4	0.0363047	0.0714741
K02043..GntR.family.transcriptional.regulator..phosphonate.transport.system	1.62449	0.572326	12	10	0.0363144	0.0714741
K03555..DNA.mismatch.repair.protein.MutS	-0.62641	0.220565	12	12	0.0362456	0.0714741
K07120..NO_NAME	2.64216	0.930645	12	9	0.0362864	0.0714741
K07684..two.component.system..NarL.family..nitrate.nitrite.response.regulator.NarL	2.05623	0.724152	12	10	0.0362677	0.0714741
K12151..multiple.stress.resistance.protein.BhsA	1.98142	0.697465	12	11	0.0362085	0.0714741
K12507..acyl.CoA.synthetase	2.02342	0.71247	12	9	0.0362459	0.0714741
K09710..hypothetical.protein	0.657014	0.231624	12	12	0.0363936	0.0715659
K16703..NO_NAME	1.12944	0.398193	12	10	0.0363996	0.0715659
K08984..putative.membrane.protein	1.24408	0.438742	12	9	0.0364356	0.0715988
K03526...E..4.hydroxy.3.methylbut.2.enyl.diphosphate.synthase..EC.1.17.7.1.1.17.7.3.	-0.519015	0.183141	12	12	0.036504	0.0716727
K03543..multidrug.resistance.protein.A	0.837557	0.295638	12	10	0.0365435	0.0716727
K03768..peptidyl.prolyl.cis.trans.isomerase.B..cyclophilin.B.	-2.4831	0.876395	12	12	0.0365324	0.0716727
K19268..methylaspartate.mutase.epsilon.subunit..EC.5.4.99.1.	1.09333	0.38594	12	8	0.0365504	0.0716727
K14287..NO_NAME	2.06072	0.727818	12	9	0.0366157	0.071763
K11537..MFS.transporter..NHS.family..xanthosine.permease	1.00752	0.355947	12	6	0.0366515	0.0717951
K16329..pseudouridylate.synthase..EC.4.2.1.70.	1.81848	0.642668	12	6	0.0366928	0.0718383
K00046..gluconate.5.dehydrogenase	1.34124	0.47442	12	11	0.036799	0.0718574
K01169..ribonuclease.I..enterobacter.ribonuclease.	1.67578	0.59247	12	10	0.0367407	0.0718574
K02237..competence.protein.ComEA	-0.648464	0.269279	12	11	0.0367993	0.0718574
K03649..TDG.mug.DNA.glycosylase.family.protein..EC.3.2.2...	1.91651	0.677713	12	8	0.0367651	0.0718574
K07019..NO_NAME	1.61493	0.571077	12	10	0.0367667	0.0718574
K03979..GTP.binding.protein	-0.973786	0.344699	12	12	0.0368893	0.0719952
K00675..N.hydroxyarylamine.O.acetyltransferase	1.63446	0.578829	12	9	0.0369457	0.0720022
K12147..acidic.protein.MsyB	1.83994	0.651593	12	9	0.036945	0.0720022
K21901..NO_NAME	1.23412	0.437071	12	9	0.036951	0.0720022
K20861..NO_NAME	1.31608	0.466604	12	11	0.0370849	0.0722252
K01835..phosphoglucomutase..EC.5.4.2.2.	-0.926666	0.328613	12	12	0.0371115	0.0722311
K07156..NO_NAME	1.46462	0.519447	12	10	0.0371269	0.0722311
K03646..colicin.import.membrane.protein	1.77741	0.630726	12	10	0.0371946	0.072325
K11065..thiol.peroxidase..atypical.2.Cys.peroxiredoxin	1.36752	0.485442	12	11	0.037237	0.0723696
K05988..NO_NAME	-1.80302	0.676433	12	4	0.0372777	0.0724109
K02346..DNA.polymerase.IV	1.03152	0.366454	12	12	0.0373336	0.0724814
K00633..galactoside.O.acetyltransferase	2.01844	0.718755	12	9	0.0376258	0.0729368
K06950..NO_NAME	-1.88602	0.671448	12	12	0.0375974	0.0729368
K23004..NO_NAME	-1.92317	0.684837	12	5	0.0376271	0.0729368
K19156..NO_NAME	1.76536	0.628803	12	6	0.0376593	0.0729613
K00275..pyridoxamine.5..phosphate.oxidase..EC.1.4.3.5.	0.92367	0.329131	12	12	0.0377084	0.0730062
K11739..bacteriophage.N4.adsorption.protein.A	1.80323	0.642613	12	10	0.0377218	0.0730062
K01869..leucyl.tRNA.synthetase..EC.6.1.1.4.	-0.829537	0.295733	12	12	0.0377694	0.0730601
K03609..septum.site.determining.protein.MinD	1.00819	0.359644	12	10	0.0378459	0.0731321
K03806..AmpD.protein	1.15121	0.410642	12	10	0.0378393	0.0731321
K01939..adenylosuccinate.synthase..EC.6.3.4.4.	-0.89318	0.318854	12	12	0.0379392	0.0732742
K04016..formate.dependent.nitrite.reductase..possible.assembly.protein	2.03307	0.726143	12	9	0.0380017	0.0733567
K02190..sirohydrochlorin.cobaltochelatase..EC.4.99.1.3.	-1.41596	0.534533	12	4	0.0380843	0.0734018
K07290..hypothetical.protein	1.69643	0.606301	12	10	0.0380836	0.0734018
K12945..NO_NAME	1.52426	0.544612	12	7	0.0380476	0.0734018
K09473..gamma.glutamyl.gamma.aminobutyrate.hydrolase..EC.3.5.1.94.	0.62327	0.222944	12	7	0.0381896	0.0735666
K01581..ornithine.decarboxylase..EC.4.1.1.17.	1.78321	0.638013	12	10	0.0382213	0.0735893
K02196..heme.exporter.protein.D	1.17342	0.420022	12	10	0.0382769	0.0736572
K07357..type.1.fimbriae.regulatory.protein.FimB	1.41387	0.506168	12	7	0.0382962	0.0736572
K00254..dihydroorotate.dehydrogenase..EC.1.3.5.2.	1.33374	0.477727	12	11	0.0383615	0.0737065
K20344..ATP.binding.cassette..subfamily.C..bacteriocin.exporter	-1.22658	0.463992	12	4	0.0383493	0.0737065
K02761..PTS.system..cellobiose.specific.IIC.component	1.47785	0.529488	12	12	0.0383954	0.0737335
K15727..NO_NAME	-1.1376	0.430867	12	4	0.0385538	0.0739993
K00336..NADH.quinone.oxidoreductase.subunit.G..EC.1.6.5.3.	0.96585	0.346615	12	12	0.0386032	0.0740559
K01914..aspartate..ammonia.ligase..EC.6.3.1.1.	-1.06249	0.381859	12	12	0.0387916	0.0742847
K04021..aldehyde.dehydrogenase	1.76195	0.633132	12	9	0.0387686	0.0742847
K07491..putative.transposase	1.31747	0.473541	12	11	0.0388025	0.0742847
K12528..putative.selenate.reductase.molybdopterin.binding.subunit	1.47713	0.530869	12	10	0.0387882	0.0742847
K02399..flagella.synthesis.protein.FlgN	1.06845	0.384301	12	10	0.0388905	0.0744148
K01277..dipeptidyl.peptidase.III	-1.4436	0.548431	12	4	0.0389535	0.0744923
K11201..PTS.system..fructose.specific.IIA.like.component	1.22893	0.442301	12	10	0.038971	0.0744923
K22044..NO_NAME	1.18558	0.426827	12	10	0.0390095	0.0745274
K00852..ribokinase..EC.2.7.1.15.	0.905041	0.325949	12	12	0.0390576	0.0745809
K05875..methyl.accepting.chemotaxis.protein.II..aspartate.sensor.receptor	1.42058	0.511939	12	10	0.0391379	0.0746958
K00008..L.iditol.2.dehydrogenase..EC.1.1.1.14.	-1.0579	0.402641	12	4	0.0392071	0.0747511
K01487..guanine.deaminase..EC.3.5.4.3.	1.28177	0.462135	12	11	0.0391988	0.0747511
K11358..aspartate.aminotransferase..EC.2.6.1.1.	-1.2901	0.465296	12	12	0.0392418	0.0747789
K03896..acetyl.CoA.N6.hydroxylysine.acetyl.transferase..EC.2.3.1.102.	0.998017	0.360107	12	6	0.0392979	0.0748474
K01478..arginine.deiminase..EC.3.5.3.6.	1.59952	0.577381	12	9	0.0393512	0.0749104
K05982..deoxyribonuclease.V	1.61779	0.584817	12	9	0.0395376	0.0751317
K07236..tRNA.2.thiouridine.synthesizing.protein.C	1.55467	0.561992	12	10	0.0395355	0.0751317
K07812..trimethylamine.N.oxide.reductase..cytochrome.c..2	1.63691	0.591872	12	10	0.0395686	0.0751317
K11741..quaternary.ammonium.compound.resistance.protein.SugE	1.7636	0.637593	12	9	0.0395514	0.0751317
K18221..NO_NAME	-1.22216	0.466273	12	4	0.0395246	0.0751317
K00688..starch.phosphorylase..EC.2.4.1.1.	1.06456	0.385382	12	12	0.0397232	0.0753868
K03208..colanic.acid.biosynthesis.glycosyl.transferase.WcaI	1.2185	0.441754	12	10	0.0399137	0.0756274
K11935..biofilm.PGA.synthesis.protein.PgaA	1.37767	0.49943	12	7	0.0399061	0.0756274
K16868..NO_NAME	1.3987	0.507153	12	11	0.0399314	0.0756274
K21090..NO_NAME	0.998791	0.361999	12	11	0.0398771	0.0756274
K01156..type.III.restriction.enzyme	-1.21797	0.441804	12	8	0.0399862	0.0756925
K03316..monovalent.cation.H..antiporter..CPA1.family	0.437492	0.158748	12	12	0.0400295	0.0757358
K07150..NO_NAME	1.03135	0.374436	12	10	0.0401004	0.0758313
K02345..DNA.polymerase.III.subunit.theta..EC.2.7.7.7.	1.86008	0.675662	12	8	0.0401682	0.075921
K00384..thioredoxin.reductase..NADPH...EC.1.8.1.9.	-1.78911	0.759449	12	12	0.0402407	0.0760193
K11720..lipopolysaccharide.export.system.permease.protein	0.568867	0.206844	12	12	0.0402995	0.0760916
K15830..NO_NAME	1.3185	0.479491	12	10	0.0403204	0.0760925
K03516..flagellar.protein.FlhE	1.97928	0.720037	12	9	0.0403651	0.0761382
K15545..NO_NAME	1.70476	0.620709	12	12	0.0404797	0.0763156
K02036..phosphate.transport.system.ATP.binding.protein..EC.3.6.3.27.	-0.523427	0.190746	12	12	0.0405937	0.0763753
K02381..FdrA.protein	2.49858	0.910492	12	8	0.0405883	0.0763753
K09022..UPF0076.protein.YjgF	1.80155	0.656418	12	12	0.0405735	0.0763753
K09982..hypothetical.protein	2.18779	0.797078	12	7	0.0405619	0.0763753
K11085..ATP.binding.cassette..subfamily.B..bacterial.MsbA..EC.3.6.3...	1.34435	0.490872	12	12	0.0408556	0.0768293
K19506..PTS.system..fructoselysine.glucoselysine.specific.IIA.component..EC.2.7.1...	-1.40518	0.513215	12	7	0.0408895	0.0768541
K02315..DNA.replication.protein.DnaC	0.753161	0.275181	12	12	0.04094	0.0768734
K15551..taurine.transport.system.substrate.binding.protein	1.78153	0.650923	12	10	0.0409412	0.0768734
K18898..NO_NAME	1.10518	0.404189	12	10	0.0410688	0.077074
K02110..F.type.H..transporting.ATPase.subunit.c	0.21207	0.0775894	12	12	0.0411216	0.0771342
K01612..4.hydroxybenzoate.decarboxylase..EC.4.1.1.61.	1.26746	0.463828	12	7	0.0411524	0.0771529
K09761..ribosomal.RNA.small.subunit.methyltransferase.E	0.566578	0.207467	12	12	0.0412346	0.077268
K05995..dipeptidase.E	1.3314	0.487645	12	8	0.0412669	0.0772896
K02805..lipopolysaccharide.biosynthesis.protein	1.14133	0.418609	12	8	0.0414535	0.0775999
K01902..succinyl.CoA.synthetase.alpha.subunit..EC.6.2.1.5.	1.45955	0.535731	12	11	0.0415556	0.0777519
K02115..F.type.H..transporting.ATPase.subunit.gamma	-0.498383	0.183044	12	12	0.0416379	0.0778666
K01466..allantoinase..EC.3.5.2.5.	1.32838	0.488175	12	12	0.0417192	0.0779019
K05839..haemolysin.expression.modulating.protein	1.84829	0.716179	12	4	0.0417197	0.0779019
K09516..all.trans.retinol.13.14.reductase..EC.1.3.99.23.	-1.09978	0.426047	12	4	0.0417085	0.0779019
K01066..esterase...lipase	1.82223	0.670219	12	8	0.0418322	0.0780727
K19267..NAD.P.H.dehydrogenase..quinone...EC.1.6.5.2.	1.03223	0.379721	12	6	0.0418552	0.0780764
K00123..formate.dehydrogenase.major.subunit..EC.1.2.1.2.	1.2402	0.456603	12	12	0.0419672	0.0782461
K12065..conjugal.transfer.pilus.assembly.protein.TraB	0.98728	0.363651	12	6	0.042029	0.078322
K11941..glucans.biosynthesis.protein.C	1.6953	0.625603	12	8	0.042283	0.0787559
K14591..NO_NAME	1.20261	0.444284	12	9	0.0424351	0.0789995
K01214..isoamylase	-1.31184	0.484824	12	8	0.0424878	0.079058
K09781..hypothetical.protein	1.55132	0.573549	12	10	0.0425407	0.0790866
K11740..bacteriophage.N4.adsorption.protein.B	1.92171	0.710515	12	10	0.0425458	0.0790866
K06024..segregation.and.condensation.protein.B	-1.89466	0.700736	12	10	0.0425896	0.0791285
[truncated: 931 more rows]

## Sheet: MetaCyc_Pathways_SSE_vs_NSC
MetaCyc pathway	coef	stderr	N	N.not.0	pval	qval
PWY0.1241..ADP.L.glycero..beta..D.manno.heptose.biosynthesis	1.11863	0.112382	12	12	1.65844e-06	0.000691568
PWY.5104..L.isoleucine.biosynthesis.IV	-4.36092	0.497633	12	9	5.25505e-06	0.00109568
PWY0.301..L.ascorbate.degradation.I..bacterial..anaerobic.	1.43397	0.182788	12	12	1.39706e-05	0.00194192
FAO.PWY..fatty.acid..beta..oxidation.I..generic.	1.448	0.212986	12	12	4.74911e-05	0.0031472
PWY.5138..fatty.acid..beta..oxidation.IV..unsaturated..even.number.	1.44487	0.215346	12	12	5.30132e-05	0.0031472
PWY.6961..L.ascorbate.degradation.II..bacterial..aerobic.	1.57236	0.236848	12	12	5.79084e-05	0.0031472
PWY.7204..pyridoxal.5..phosphate.salvage.II..plants.	1.13859	0.161548	12	12	3.50708e-05	0.0031472
PWY.7392..taxadiene.biosynthesis..engineered.	-2.87446	0.231754	12	10	6.0378e-05	0.0031472
GLUCARDEG.PWY..D.glucarate.degradation.I	1.63287	0.25861	12	12	8.74818e-05	0.00379299
PWY.7456...beta...1.4..mannan.degradation	-3.02703	0.481712	12	10	9.0959e-05	0.00379299
PWY.5030..L.histidine.degradation.III	-4.80537	0.782515	12	10	0.00010962	0.00415559
PWY.5855..ubiquinol.7.biosynthesis..early.decarboxylation.	1.78929	0.167005	12	11	0.000122701	0.00426384
AST.PWY..L.arginine.degradation.II..AST.pathway.	1.70733	0.291888	12	12	0.000161773	0.00508937
METHGLYUT.PWY..superpathway.of.methylglyoxal.degradation	1.62674	0.166423	12	12	0.000190669	0.00508937
PWY.5690..TCA.cycle.II..plants.and.fungi.	-2.11806	0.217772	12	7	0.000195276	0.00508937
PWY.6470..peptidoglycan.biosynthesis.V...beta..lactam.resistance.	-2.21701	0.381861	12	8	0.000171599	0.00508937
PWY.7282..4.amino.2.methyl.5.diphosphomethylpyrimidine.biosynthesis.II	0.462996	0.0818505	12	12	0.000210526	0.00516408
FASYN.ELONG.PWY..fatty.acid.elongation....saturated	0.606222	0.110344	12	12	0.000264024	0.00524276
PWY.5913..partial.TCA.cycle..obligate.autotrophs.	0.985993	0.107807	12	12	0.000261874	0.00524276
PWY.5971..palmitate.biosynthesis..type.II.fatty.acid.synthase.	0.612675	0.11151	12	12	0.000263868	0.00524276
PWY0.1337..oleate..beta..oxidation	1.48297	0.16097	12	12	0.000252952	0.00524276
HSERMETANA.PWY..L.methionine.biosynthesis.III	-1.55527	0.175953	12	12	0.000307945	0.00581864
PWY.6572..chondroitin.sulfate.degradation.I..bacterial.	-2.46047	0.347021	12	6	0.000394875	0.00581864
PWY.7094..fatty.acid.salvage	1.42107	0.164361	12	12	0.000341909	0.00581864
PWY.7664..oleate.biosynthesis.IV..anaerobic.	0.585918	0.112802	12	12	0.000404653	0.00581864
PWY0.1415..superpathway.of.heme.b.biosynthesis.from.uroporphyrinogen.III	1.63891	0.314797	12	12	0.000397687	0.00581864
PWY0.1477..ethanolamine.utilization	1.25851	0.149786	12	12	0.000391401	0.00581864
PWY0.1586..peptidoglycan.maturation..meso.diaminopimelate.containing.	0.951158	0.112257	12	12	0.000376167	0.00581864
THISYNARA.PWY..superpathway.of.thiamine.diphosphate.biosynthesis.III..eukaryotes.	-2.89993	0.552361	12	12	0.000373354	0.00581864
PWY0.461..L.lysine.degradation.I	1.64686	0.199682	12	12	0.000427197	0.00593804
PWY.6305..superpathway.of.putrescine.biosynthesis	1.37784	0.16837	12	12	0.000443142	0.00596098
PWY.5861..superpathway.of.demethylmenaquinol.8.biosynthesis.I	0.736326	0.0933125	12	12	0.000525633	0.00664209
PWY0.1296..purine.ribonucleosides.degradation	0.8219	0.104138	12	12	0.000525178	0.00664209
PWY.5188..tetrapyrrole.biosynthesis.I..from.glutamate.	1.29349	0.167992	12	12	0.000589489	0.00722991
PWY1ZNC.1..assimilatory.sulfate.reduction.IV	1.78782	0.365413	12	12	0.000630021	0.00750624
PWY.1269..CMP.3.deoxy.D.manno.octulosonate.biosynthesis	0.743346	0.100832	12	12	0.00072164	0.00776029
PWY.4984..urea.cycle	-5.65096	0.783785	12	8	0.00079999	0.00776029
PWY.5837..2.carboxy.1.4.naphthoquinol.biosynthesis	1.22349	0.167665	12	12	0.000756602	0.00776029
PWY.6282..palmitoleate.biosynthesis.I..from..5Z..dodec.5.enoate.	0.578864	0.119433	12	12	0.00067463	0.00776029
PWY.7663..gondoate.biosynthesis..anaerobic.	0.692919	0.0954083	12	12	0.000773425	0.00776029
PWY0.1338..polymyxin.resistance	1.45088	0.201249	12	12	0.000800222	0.00776029
PWY0.862...5Z..dodecenoate.biosynthesis.I	0.562441	0.118031	12	12	0.000762547	0.00776029
PWY66.399..gluconeogenesis.III	-4.39685	0.60848	12	7	0.000791771	0.00776029
PWY.7117..C4.photosynthetic.carbon.assimilation.cycle..PEPCK.type	0.553885	0.0774643	12	12	0.000831287	0.00787833
BIOTIN.BIOSYNTHESIS.PWY..biotin.biosynthesis.I	0.52374	0.0746963	12	12	0.000909798	0.00792942
PWY.5897..superpathway.of.menaquinol.11.biosynthesis	0.655127	0.0939205	12	12	0.000931754	0.00792942
PWY.5898..superpathway.of.menaquinol.12.biosynthesis	0.655127	0.0939205	12	12	0.000931754	0.00792942
PWY.5899..superpathway.of.menaquinol.13.biosynthesis	0.655127	0.0939205	12	12	0.000931754	0.00792942
PWY.6285..superpathway.of.fatty.acids.biosynthesis..E..coli.	0.944975	0.201706	12	12	0.000861068	0.00792942
P4.PWY..superpathway.of.L.lysine..L.threonine.and.L.methionine.biosynthesis.I	0.566144	0.127037	12	12	0.00122267	0.00852136
PWY.4041...gamma..glutamyl.cycle	0.784847	0.117817	12	12	0.00115053	0.00852136
PWY.5004..superpathway.of.L.citrulline.metabolism	-4.01312	0.894148	12	6	0.00116414	0.00852136
PWY.5838..superpathway.of.menaquinol.8.biosynthesis.I	0.613427	0.0917886	12	12	0.00113374	0.00852136
PWY.5862..superpathway.of.demethylmenaquinol.9.biosynthesis	1.08166	0.161564	12	12	0.00112454	0.00852136
PWY.5981..CDP.diacylglycerol.biosynthesis.III	1.07015	0.159141	12	12	0.00110214	0.00852136
PWY.6519..8.amino.7.oxononanoate.biosynthesis.I	0.547993	0.0825346	12	12	0.00116802	0.00852136
PWY.7383..anaerobic.energy.metabolism..invertebrates..cytosol.	-4.6922	0.690302	12	7	0.00104915	0.00852136
PWY.7790..UMP.biosynthesis.II	-0.519604	0.0790964	12	12	0.00122609	0.00852136
PWY.7791..UMP.biosynthesis.III	-0.519604	0.0790964	12	12	0.00122609	0.00852136
PWY.7858...5Z..dodecenoate.biosynthesis.II	1.43377	0.316191	12	12	0.00108383	0.00852136
HEME.BIOSYNTHESIS.II..heme.b.biosynthesis.I..aerobic.	1.36365	0.210534	12	12	0.00130743	0.00865397
PWY.5918..superpathway.of.heme.b.biosynthesis.from.glutamate	1.42646	0.219694	12	12	0.00129303	0.00865397
PWY.7883..anhydromuropeptides.recycling.II	1.25343	0.192497	12	12	0.00127643	0.00865397
GALACTARDEG.PWY..D.galactarate.degradation.I	1.50839	0.345336	12	12	0.00140376	0.00873681
GLUCARGALACTSUPER.PWY..superpathway.of.D.glucarate.and.D.galactarate.degradation	1.50839	0.345336	12	12	0.00140376	0.00873681
HEMESYN2.PWY..heme.b.biosynthesis.II..oxygen.independent.	1.34099	0.209647	12	12	0.00138393	0.00873681
PWY.5686..UMP.biosynthesis.I	-0.505793	0.078738	12	12	0.00135746	0.00873681
GLYCOL.GLYOXDEG.PWY..superpathway.of.glycol.metabolism.and.degradation	1.78183	0.280543	12	12	0.00142897	0.00874648
PWY0.845..superpathway.of.pyridoxal.5..phosphate.biosynthesis.and.salvage	0.505002	0.0797346	12	12	0.00144726	0.00874648
HEME.BIOSYNTHESIS.II.1..heme.b.biosynthesis.V..aerobic.	1.36002	0.216741	12	12	0.00150943	0.00881602
PYRIDOXSYN.PWY..pyridoxal.5..phosphate.biosynthesis.I	0.537857	0.0858761	12	12	0.00152219	0.00881602
SULFATE.CYS.PWY..superpathway.of.sulfate.assimilation.and.cysteine.biosynthesis	0.511122	0.0813045	12	12	0.00149685	0.00881602
ORNDEG.PWY..superpathway.of.ornithine.degradation	1.47207	0.239915	12	12	0.00166981	0.00953852
P461.PWY..hexitol.fermentation.to.lactate..formate..ethanol.and.acetate	1.01767	0.167249	12	12	0.00173364	0.00967547
PWY4FS.7..phosphatidylglycerol.biosynthesis.I..plastidic.	0.777978	0.128343	12	12	0.00176339	0.00967547
PWY4FS.8..phosphatidylglycerol.biosynthesis.II..non.plastidic.	0.777978	0.128343	12	12	0.00176339	0.00967547
NAGLIPASYN.PWY..lipid.IVA.biosynthesis..E..coli.	0.643302	0.107898	12	12	0.00189918	0.0101533
PWY.8073..lipid.IVA.biosynthesis..P..putida.	0.643302	0.107898	12	12	0.00189918	0.0101533
PWY.5845..superpathway.of.menaquinol.9.biosynthesis	0.902619	0.152433	12	12	0.00195817	0.0103362
CARNMET.PWY..L.carnitine.degradation.I	1.59501	0.27359	12	12	0.00209884	0.0106734
PWY.5723..Rubisco.shunt	1.21511	0.208224	12	12	0.00208982	0.0106734
PWY.6922..L.N.delta..acetylornithine.biosynthesis	-3.82955	0.654163	12	8	0.00206052	0.0106734
PHOSLIPSYN.PWY..superpathway.of.phospholipid.biosynthesis.I..bacteria.	0.662199	0.114644	12	12	0.00218707	0.0109881
PWY.5989..stearate.biosynthesis.II..bacteria.and.plants.	0.465075	0.114248	12	12	0.00224749	0.0110259
PWY.7118..chitin.deacetylation	1.47349	0.256064	12	12	0.00222401	0.0110259
NONOXIPENT.PWY..pentose.phosphate.pathway..non.oxidative.branch..I	0.693596	0.121664	12	12	0.00231792	0.0110684
PWY.7316..dTDP.N.acetylviosamine.biosynthesis	-3.19891	0.790491	12	10	0.00233577	0.0110684
PWY0.42..2.methylcitrate.cycle.I	1.56976	0.275017	12	12	0.00230555	0.0110684
PWY.6823..molybdopterin.biosynthesis	0.729462	0.18259	12	12	0.00253841	0.0118935
ECASYN.PWY..enterobacterial.common.antigen.biosynthesis	1.47378	0.26576	12	11	0.00261851	0.0121324
HOMOSER.METSYN.PWY..L.methionine.biosynthesis.I	1.25345	0.318271	12	12	0.00278255	0.0126931
KDO.NAGLIPASYN.PWY..superpathway.of..Kdo.2.lipid.A.biosynthesis	1.23388	0.22593	12	12	0.00280039	0.0126931
KETOGLUCONMET.PWY..ketogluconate.metabolism	1.23641	0.229036	12	12	0.00294626	0.0129252
P124.PWY..Bifidobacterium.shunt	-2.01861	0.519426	12	12	0.0030281	0.0129252
PWY.5347..superpathway.of.L.methionine.biosynthesis..transsulfuration.	0.997918	0.256806	12	12	0.00302977	0.0129252
PWY.5367..petroselinate.biosynthesis	1.49729	0.278682	12	12	0.00300799	0.0129252
PWY.8178..pentose.phosphate.pathway..non.oxidative.branch..II	0.593295	0.110512	12	12	0.0030182	0.0129252
SO4ASSIM.PWY..assimilatory.sulfate.reduction.I	0.878773	0.163928	12	12	0.00303757	0.0129252
METSYN.PWY..superpathway.of.L.homoserine.and.L.methionine.biosynthesis	1.03849	0.268657	12	12	0.00313208	0.0130608
PWY0.1298..superpathway.of.pyrimidine.deoxyribonucleosides.degradation	0.742158	0.139162	12	12	0.00310688	0.0130608
PWY.5860..superpathway.of.demethylmenaquinol.6.biosynthesis.I	1.16808	0.219966	12	12	0.00316519	0.0130682
FUC.RHAMCAT.PWY..superpathway.of.fucose.and.rhamnose.degradation	0.977319	0.186722	12	12	0.00337034	0.0137787
GLYCOLYSIS.E.D..superpathway.of.glycolysis.and.the.Entner.Doudoroff.pathway	0.653343	0.172107	12	12	0.00350795	0.0140655
PWY.5130..2.oxobutanoate.degradation.I	-1.84916	0.356046	12	10	0.00348553	0.0140655
COBALSYN.PWY..superpathway.of.adenosylcobalamin.salvage.from.cobinamide.I	0.666051	0.129074	12	12	0.00358406	0.0142338
FUCCAT.PWY..fucose.degradation	1.32226	0.257379	12	12	0.00365335	0.0142378
P441.PWY..superpathway.of.N.acetylneuraminate.degradation	0.568466	0.110587	12	12	0.00364398	0.0142378
PWY.6906..chitin.derivatives.degradation	-2.13571	0.416737	12	10	0.0036921	0.0142556
PWY.7315..dTDP.N.acetylthomosamine.biosynthesis	1.18755	0.235721	12	12	0.00397386	0.0152027
RHAMCAT.PWY..L.rhamnose.degradation.I	0.593739	0.118173	12	12	0.00402029	0.0152405
GLUDEG.I.PWY..GABA.shunt	-2.32925	0.465132	12	12	0.00407769	0.0153189
GLCMANNANAUT.PWY..superpathway.of.N.acetylglucosamine..N.acetylmannosamine.and.N.acetylneuraminate.degradation	0.792343	0.159043	12	12	0.0041688	0.015384
PWY0.1297..superpathway.of.purine.deoxyribonucleosides.degradation	1.06226	0.213009	12	12	0.0041511	0.015384
POLYISOPRENSYN.PWY..polyisoprenoid.biosynthesis..E..coli.	0.921994	0.25373	12	12	0.00458396	0.0167298
PWY.5497..purine.nucleobases.degradation.II..anaerobic.	0.634667	0.130461	12	12	0.00461372	0.0167298
COA.PWY..coenzyme.A.biosynthesis.I..prokaryotic.	-0.355932	0.0742461	12	12	0.00490976	0.0169204
PWY.5136..fatty.acid..beta..oxidation.II..plant.peroxisome.	1.16031	0.241862	12	12	0.00489488	0.0169204
PWY.5840..superpathway.of.menaquinol.7.biosynthesis	0.978536	0.203372	12	12	0.00483416	0.0169204
PWY.5850..superpathway.of.menaquinol.6.biosynthesis	0.978536	0.203372	12	12	0.00483416	0.0169204
PWY.5896..superpathway.of.menaquinol.10.biosynthesis	0.978536	0.203372	12	12	0.00483416	0.0169204
PWY.6284..superpathway.of.unsaturated.fatty.acids.biosynthesis..E..coli.	1.1748	0.243628	12	12	0.00478948	0.0169204
MET.SAM.PWY..superpathway.of.S.adenosyl.L.methionine.biosynthesis	0.935034	0.261124	12	12	0.00500502	0.0171073
PWY.7328..superpathway.of.UDP.glucose.derived.O.antigen.building.blocks.biosynthesis	-0.780038	0.164947	12	12	0.0052006	0.0176313
PWY.6803..phosphatidylcholine.acyl.editing	1.26549	0.268244	12	12	0.00525352	0.0176671
DTDPRHAMSYN.PWY..dTDP..beta..L.rhamnose.biosynthesis	-0.894582	0.25293	12	12	0.00538477	0.0179636
NAD.BIOSYNTHESIS.II..NAD.salvage.pathway.III..to.nicotinamide.riboside.	1.33259	0.284762	12	12	0.00543514	0.0179877
DARABCATK12.PWY..D.arabinose.degradation.I	2.01346	0.438188	12	12	0.00586703	0.0188128
PWY.241..C4.photosynthetic.carbon.assimilation.cycle..NADP.ME.type	-1.15466	0.330546	12	12	0.00579211	0.0188128
PWY.7187..pyrimidine.deoxyribonucleotides.de.novo.biosynthesis.II	0.973155	0.211739	12	11	0.00586147	0.0188128
PWY.7851..coenzyme.A.biosynthesis.II..eukaryotic.	-0.350913	0.0761566	12	12	0.00579923	0.0188128
SALVADEHYPOX.PWY..adenosine.nucleotides.degradation.II	0.605432	0.13199	12	12	0.00591001	0.0188128
UNMAPPED	-1.07697	0.237636	12	12	0.00621396	0.0196305
PWY0.1061..superpathway.of.L.alanine.biosynthesis	0.530374	0.117481	12	12	0.00631442	0.0197978
FERMENTATION.PWY..mixed.acid.fermentation	0.89234	0.198668	12	12	0.00644914	0.0200693
PWY4LZ.257..superpathway.of.fermentation..Chlamydomonas.reinhardtii.	1.05873	0.238221	12	12	0.00673768	0.0208119
PWY.7807..glyphosate.degradation.III	1.71218	0.386805	12	10	0.00685057	0.0210051
PWY.7446..sulfoquinovose.degradation.I	1.61904	0.366621	12	9	0.00691695	0.0210538
PWY.5747..2.methylcitrate.cycle.II	1.70428	0.387165	12	12	0.00700913	0.0211798
COA.PWY.1..superpathway.of.coenzyme.A.biosynthesis.III..mammals.	-0.336773	0.0767212	12	12	0.00709072	0.0212722
PWY.5505..L.glutamate.and.L.glutamine.biosynthesis	-1.4633	0.335229	12	11	0.00725555	0.0216112
GLUCONEO.PWY..gluconeogenesis.I	0.272304	0.0626187	12	12	0.00736887	0.021793
LACTOSECAT.PWY..lactose.and.galactose.degradation.I	-1.82078	0.422286	12	12	0.00763026	0.0221877
P161.PWY..acetylene.degradation..anaerobic.	1.3313	0.309603	12	12	0.00771515	0.0221877
PWY.5675..nitrate.reduction.V..assimilatory.	1.33934	0.31128	12	12	0.00769591	0.0221877
PWY.6292..superpathway.of.L.cysteine.biosynthesis..mammalian.	-1.36971	0.315061	12	12	0.00756757	0.0221877
PWY.5384..sucrose.degradation.IV..sucrose.phosphorylase.	0.737367	0.172508	12	12	0.00790557	0.0225796
UNINTEGRATED	0.172881	0.0405689	12	12	0.008004	0.0227052
X1CMET2.PWY..folate.transformations.III..E..coli.	-0.0928246	0.02238	12	12	0.00893027	0.025023
OANTIGEN.PWY..O.antigen.building.blocks.biosynthesis..E..coli.	-0.738096	0.178008	12	12	0.00894106	0.025023
PWY.6859..all.trans.farnesol.biosynthesis	0.799441	0.193402	12	12	0.00905338	0.0251684
ASPASN.PWY..superpathway.of.L.aspartate.and.L.asparagine.biosynthesis	0.42243	0.1027	12	12	0.00924174	0.0255219
PWY.5154..L.arginine.biosynthesis.III..via.N.acetyl.L.citrulline.	0.531076	0.165668	12	12	0.00940087	0.0257905
PWY.6353..purine.nucleotides.degradation.II..aerobic.	0.767821	0.188813	12	12	0.00966653	0.026346
PWY0.1533..methylphosphonate.degradation.I	1.66334	0.410977	12	10	0.00985165	0.0266762
PWY.561..superpathway.of.glyoxylate.cycle.and.fatty.acid.degradation	0.86064	0.215846	12	12	0.0104546	0.0281263
PWY.5659..GDP.mannose.biosynthesis	0.647005	0.162995	12	12	0.0106418	0.0284462
PENTOSE.P.PWY..pentose.phosphate.pathway	0.458393	0.116221	12	12	0.0109144	0.0289893
GLYOXYLATE.BYPASS..glyoxylate.cycle	0.949625	0.244483	12	12	0.0115924	0.0305951
PWY.7221..guanosine.ribonucleotides.de.novo.biosynthesis	-0.383306	0.0990581	12	12	0.0117662	0.0308584
PWY.6612..superpathway.of.tetrahydrofolate.biosynthesis	0.962985	0.249462	12	12	0.011877	0.0309545
TCA.GLYOX.BYPASS..superpathway.of.glyoxylate.bypass.and.TCA	0.960617	0.252582	12	12	0.0125874	0.0326022
PWY.5705..allantoin.degradation.to.glyoxylate.III	1.32853	0.351528	12	12	0.0128991	0.0332033
PWY.5973..cis.vaccenate.biosynthesis	0.271301	0.0720749	12	12	0.0131014	0.033517
PWY.5022..4.aminobutanoate.degradation.V	-2.24465	0.598422	12	8	0.0132808	0.0335642
PWY.7409..phospholipid.remodeling..phosphatidylethanolamine..yeast.	1.21299	0.323079	12	7	0.0132327	0.0335642
PWY.7805...aminomethyl.phosphonate.degradation	2.11028	0.573175	12	9	0.0142678	0.0358414
FOLSYN.PWY..superpathway.of.tetrahydrofolate.biosynthesis.and.salvage	0.844776	0.231867	12	12	0.0148511	0.0367641
GLYCOLYSIS.TCA.GLYOX.BYPASS..superpathway.of.glycolysis..pyruvate.dehydrogenase..TCA..and.glyoxylate.bypass	1.52727	0.418742	12	12	0.0147902	0.0367641
PWY66.389..phytol.degradation	1.42773	0.392207	12	12	0.0148996	0.0367641
PWY.6606..guanosine.nucleotides.degradation.II	1.05461	0.290522	12	12	0.01506	0.0369413
PWY.3841..folate.transformations.II..plants.	-0.232659	0.0798773	12	12	0.0154927	0.0377805
PWY0.1261..anhydromuropeptides.recycling.I	0.474778	0.133826	12	12	0.0164272	0.0398265
PWY.6936..seleno.amino.acid.biosynthesis..plants.	0.615844	0.174053	12	12	0.0165927	0.0399952
ARGSYN.PWY..L.arginine.biosynthesis.I..via.L.ornithine.	0.305754	0.106945	12	12	0.0169868	0.0400876
HCAMHPDEG.PWY..3.phenylpropanoate.and.3..3.hydroxyphenyl.propanoate.degradation.to.2.hydroxypentadienoate	1.52666	0.433577	12	10	0.0168995	0.0400876
PWY.6690..cinnamate.and.3.hydroxycinnamate.degradation.to.2.hydroxypentadienoate	1.52666	0.433577	12	10	0.0168995	0.0400876
PWY.7269..mitochondrial.NADPH.production..yeast.	1.4539	0.413665	12	10	0.0170156	0.0400876
UDPNAGSYN.PWY..UDP.N.acetyl.D.glucosamine.biosynthesis.I	0.441041	0.126657	12	12	0.0176175	0.0412725
PWY.7209..superpathway.of.pyrimidine.ribonucleosides.degradation	-0.980074	0.28256	12	12	0.0178771	0.0416467
HISTSYN.PWY..L.histidine.biosynthesis	-0.26749	0.0780388	12	12	0.0186829	0.043282
P221.PWY..octane.oxidation	2.61807	0.765869	12	10	0.0188703	0.0434747
PWY.7345..superpathway.of.anaerobic.sucrose.degradation	0.593213	0.212439	12	12	0.0190416	0.0436282
PWY.702..L.methionine.biosynthesis.II	0.677923	0.199948	12	12	0.0194507	0.0443221
POLYAMSYN.PWY..superpathway.of.polyamine.biosynthesis.I	0.837792	0.249824	12	12	0.0202507	0.0457118
PWY.621..sucrose.degradation.III..sucrose.invertase.	1.06842	0.387717	12	12	0.0202798	0.0457118
GLUCOSE1PMETAB.PWY..glucose.and.glucose.1.phosphate.degradation	0.489428	0.147898	12	12	0.0212583	0.0471471
PWY.5189..tetrapyrrole.biosynthesis.II..from.glycine.	1.47919	0.447472	12	9	0.0213419	0.0471471
PWY.7400..L.arginine.biosynthesis.IV..archaebacteria.	0.29055	0.106616	12	12	0.0213688	0.0471471
PWY.7560..methylerythritol.phosphate.pathway.II	0.155286	0.0469483	12	12	0.0212969	0.0471471
PWY.5667..CDP.diacylglycerol.biosynthesis.I	0.627365	0.191091	12	12	0.0218803	0.04777
PWY0.1319..CDP.diacylglycerol.biosynthesis.II	0.627365	0.191091	12	12	0.0218803	0.04777
PWY.7356..thiamine.diphosphate.salvage.IV..yeast.	-0.922911	0.281931	12	12	0.022112	0.0480245
P42.PWY..incomplete.reductive.TCA.cycle	-1.26841	0.391962	12	11	0.02305	0.0495457
PWY.6531..mannitol.cycle	1.19928	0.370103	12	12	0.0229393	0.0495457
PWY.6527..stachyose.degradation	0.532334	0.165004	12	12	0.0233046	0.0495817
PWY.8190..L.glutamate.degradation.XI..reductive.Stickland.reaction.	-1.60736	0.600616	12	7	0.0232444	0.0495817
GALACTITOLCAT.PWY..galactitol.degradation	0.9777	0.313542	12	10	0.0263045	0.05568
ARG.POLYAMINE.SYN..superpathway.of.arginine.and.polyamine.biosynthesis	0.644147	0.207254	12	12	0.0266109	0.0559707
GLYCOCAT.PWY..glycogen.degradation.I	0.742792	0.239247	12	12	0.0267103	0.0559707
TCA..TCA.cycle.I..prokaryotic.	0.880835	0.285092	12	12	0.0271702	0.0566499
PWY.6608..guanosine.nucleotides.degradation.III	0.476333	0.154682	12	12	0.0274874	0.0570261
PWY.5121..superpathway.of.geranylgeranyl.diphosphate.biosynthesis.II..via.MEP.	0.396587	0.129185	12	12	0.0277865	0.0573612
PWY.7199..pyrimidine.deoxyribonucleosides.salvage	-0.285085	0.0934522	12	12	0.028405	0.0583492
PWY0.1277..3.phenylpropanoate.and.3..3.hydroxyphenyl.propanoate.degradation	1.21971	0.401871	12	9	0.028913	0.0591016
PWY.5656..mannosylglycerate.biosynthesis.I	0.848057	0.282024	12	10	0.0298568	0.0604382
PWY0.1479..tRNA.processing	0.581234	0.193028	12	12	0.0297169	0.0604382
ARGSYNBSUB.PWY..L.arginine.biosynthesis.II..acetyl.cycle.	0.285474	0.113139	12	12	0.0302199	0.0605852
DAPLYSINESYN.PWY..L.lysine.biosynthesis.I	0.215741	0.0719479	12	12	0.0301486	0.0605852
HEXITOLDEGSUPER.PWY..superpathway.of.hexitol.degradation..bacteria.	0.66442	0.222599	12	10	0.0306293	0.060821
PWY.7111..pyruvate.fermentation.to.isobutanol..engineered.	0.410156	0.137329	12	12	0.0305646	0.060821
PWY.8004..Entner.Doudoroff.pathway.I	0.50992	0.203377	12	12	0.0310575	0.061379
P105.PWY..TCA.cycle.IV..2.oxoglutarate.decarboxylase.	0.873552	0.295481	12	12	0.0316512	0.0619873
P185.PWY..formaldehyde.assimilation.III..dihydroxyacetone.cycle.	2.54007	0.860453	12	8	0.0318112	0.0619873
PWY.6630..superpathway.of.L.tyrosine.biosynthesis	0.704865	0.238646	12	12	0.0317528	0.0619873
COLANSYN.PWY..colanic.acid.building.blocks.biosynthesis	0.431889	0.150177	12	12	0.0347551	0.0670966
PWY.5920..superpathway.of.heme.b.biosynthesis.from.glycine	1.65852	0.576179	12	9	0.0346496	0.0670966
HISDEG.PWY..L.histidine.degradation.I	-2.68502	0.940163	12	11	0.0355765	0.0681263
PWY.6318..L.phenylalanine.degradation.IV..mammalian..via.side.chain.	1.34554	0.498468	12	4	0.0356152	0.0681263
PWY.7874..L.threonate.degradation	0.744697	0.262903	12	7	0.0365639	0.0696217
X3.HYDROXYPHENYLACETATE.DEGRADATION.PWY..4.hydroxyphenylacetate.degradation	1.25997	0.445596	12	5	0.0367779	0.0697108
GLUTORN.PWY..L.ornithine.biosynthesis.I	0.434163	0.158821	12	12	0.0411009	0.0775524
LIPASYN.PWY..phospholipases	1.26866	0.471435	12	6	0.0432436	0.0801448
PWY.6708..ubiquinol.8.biosynthesis..early.decarboxylation.	1.24646	0.46283	12	6	0.0431373	0.0801448
PWY0.781..aspartate.superpathway	0.373064	0.160906	12	12	0.0428804	0.0801448
UBISYN.PWY..superpathway.of.ubiquinol.8.biosynthesis..early.decarboxylation.	1.22868	0.455988	12	6	0.0430638	0.0801448
PWY.7616..methanol.oxidation.to.carbon.dioxide	1.47174	0.579001	12	4	0.0439957	0.0811778
PWY.7115..C4.photosynthetic.carbon.assimilation.cycle..NAD.ME.type	0.366248	0.137201	12	12	0.0443787	0.0815239
AEROBACTINSYN.PWY..aerobactin.biosynthesis	1.13292	0.430621	12	6	0.046483	0.0847041
PWY.6895..superpathway.of.thiamine.diphosphate.biosynthesis.II	0.235166	0.0894065	12	12	0.0465161	0.0847041
ARGDEG.PWY..superpathway.of.L.arginine..putrescine..and.4.aminobutanoate.degradation	1.57718	0.606224	12	6	0.0481534	0.0863953
FASYN.INITIAL.PWY..superpathway.of.fatty.acid.biosynthesis.initiation..E..coli.	-1.38769	0.533065	12	8	0.0480618	0.0863953
ORNARGDEG.PWY..superpathway.of.L.arginine.and.L.ornithine.degradation	1.57718	0.606224	12	6	0.0481534	0.0863953
PWY0.41..allantoin.degradation.IV..anaerobic.	1.43755	0.552993	12	10	0.0482737	0.0863953
PWY.6992..1.5.anhydrofructose.degradation	1.48447	0.574504	12	9	0.0491981	0.0876735
PANTOSYN.PWY..superpathway.of.coenzyme.A.biosynthesis.I..bacteria.	-0.143856	0.0564326	12	12	0.0513177	0.0910617
PWY.5100..pyruvate.fermentation.to.acetate.and.lactate.II	0.209879	0.0836481	12	12	0.0538891	0.0952193
NONMEVIPP.PWY..methylerythritol.phosphate.pathway.I	-0.233885	0.0948067	12	12	0.0567409	0.0998352
PWY.6147..6.hydroxymethyl.dihydropterin.diphosphate.biosynthesis.I	-0.492918	0.201485	12	12	0.0581923	0.101959
PWY.6549..L.glutamine.biosynthesis.III	-0.743059	0.305719	12	12	0.0593423	0.103107
PWY3O.4107..NAD.salvage.pathway.V..PNC.V.cycle.	-0.804953	0.3308	12	11	0.0591358	0.103107
CENTFERM.PWY..pyruvate.fermentation.to.butanoate	-1.6871	0.703501	12	9	0.0617622	0.106867
PWY.7013...S..propane.1.2.diol.degradation	1.106	0.462315	12	8	0.0622101	0.107197
GLUCUROCAT.PWY..superpathway.of..beta..D.glucuronosides.degradation	0.587878	0.246272	12	12	0.0626118	0.107445
PWY.6590..superpathway.of.Clostridium.acetobutylicum.acidogenic.fermentation	-1.62961	0.686394	12	9	0.0636259	0.108738
GALACTUROCAT.PWY..D.galacturonate.degradation.I	0.68152	0.29	12	12	0.0655548	0.111577
PWY.5103..L.isoleucine.biosynthesis.III	0.213662	0.0914175	12	12	0.0666105	0.112456
PWY0.1221..putrescine.degradation.II	0.754572	0.3228	12	7	0.0665796	0.112456
PWY.5724..superpathway.of.atrazine.degradation	0.552828	0.249336	12	3	0.0684042	0.115018
PWY.7723..bacterial.bioluminescence	0.597216	0.27127	12	3	0.069973	0.117184
PWY.5417..catechol.degradation.III..ortho.cleavage.pathway.	0.626663	0.286191	12	3	0.0710778	0.117617
PWY.5431..aromatic.compounds.degradation.via..beta..ketoadipate	0.626663	0.286191	12	3	0.0710778	0.117617
PWY.622..starch.biosynthesis	-1.34735	0.589229	12	9	0.0709468	0.117617
CATECHOL.ORTHO.CLEAVAGE.PWY..catechol.degradation.to..beta..ketoadipate	0.648931	0.297927	12	3	0.0722156	0.119027
PWY.6182..superpathway.of.salicylate.degradation	0.686673	0.318765	12	3	0.0746787	0.122122
PWY.7245..superpathway.of.NAD.NADP...NADH.NADPH.interconversion..yeast.	0.675522	0.31322	12	3	0.0744038	0.122122
PWY.5994..palmitate.biosynthesis..type.I.fatty.acid.synthase.	-2.33209	1.04627	12	7	0.0762661	0.12423
PWY.6185..4.methylcatechol.degradation..ortho.cleavage.	0.701254	0.328711	12	3	0.0768686	0.124725
PWY.6969..TCA.cycle.V..2.oxoglutarate.synthase.	0.6747	0.3043	12	12	0.0773984	0.125097
P41.PWY..pyruvate.fermentation.to.acetate.and..S..lactate.I	-0.385378	0.174254	12	12	0.0779485	0.1255
PWY.7268..cytosolic.NADPH.production..yeast.	0.745089	0.351841	12	3	0.0785414	0.125968
P23.PWY..reductive.TCA.cycle.I	-2.05503	0.935084	12	6	0.0793242	0.126603
PWY.7254..TCA.cycle.VII..acetate.producers.	-2.32418	1.05862	12	6	0.0795443	0.126603
P122.PWY..heterolactic.fermentation	1.47246	0.677136	12	12	0.0816729	0.129497
GLYCOGENSYNTH.PWY..glycogen.biosynthesis.I..from.ADP.D.Glucose.	0.234003	0.107974	12	12	0.0824327	0.130206
PPGPPMET.PWY..ppGpp.metabolism	0.662235	0.308877	12	12	0.084886	0.133575
PWY.8187..L.arginine.degradation.XIII..reductive.Stickland.reaction.	0.489254	0.232127	12	12	0.088881	0.139336
PWY.7242..D.fructuronate.degradation	0.694987	0.331934	12	12	0.090468	0.141293
PWY490.3..nitrate.reduction.VI..assimilatory.	-1.48886	0.797324	12	4	0.0914091	0.14223
PWY.7165..L.ascorbate.biosynthesis.VIII..engineered.pathway.	0.864685	0.431238	12	3	0.0917587	0.142243
PWY.6901..superpathway.of.glucose.and.xylose.degradation	0.209021	0.100726	12	12	0.0926323	0.143065
PWY.6270..isoprene.biosynthesis.I	-0.182031	0.098363	12	12	0.0939512	0.144567
PWY.7389..superpathway.of.anaerobic.energy.metabolism..invertebrates.	-1.13164	0.579569	12	3	0.09871	0.151331
PROTOCATECHUATE.ORTHO.CLEAVAGE.PWY..protocatechuate.degradation.II..ortho.cleavage.pathway.	1.33161	0.660481	12	5	0.0998632	0.152538
PWY.6386..UDP.N.acetylmuramoyl.pentapeptide.biosynthesis.II..lysine.containing.	-0.188739	0.0939745	12	12	0.100852	0.153486
PWY.3001..superpathway.of.L.isoleucine.biosynthesis.I	0.178192	0.0897409	12	12	0.103828	0.157441
SER.GLYSYN.PWY..superpathway.of.L.serine.and.glycine.biosynthesis.I	-0.17174	0.0868096	12	12	0.104798	0.158336
CALVIN.PWY..Calvin.Benson.Bassham.cycle	0.202643	0.113808	12	12	0.10533	0.158407
PWY.7688..dTDP..alpha..D.ravidosamine.and.dTDP.4.acetyl..alpha..D.ravidosamine.biosynthesis	-0.771913	0.405476	12	3	0.105605	0.158407
P162.PWY..L.glutamate.degradation.V..via.hydroxyglutarate.	-0.806014	0.426597	12	3	0.107723	0.16088
PWY.6507..4.deoxy.L.threo.hex.4.enopyranuronate.degradation	0.563539	0.288485	12	12	0.108192	0.16088
PWY.7873..D.erythronate.degradation.II	1.09563	0.561326	12	4	0.108411	0.16088
PWY.7039..phosphatidate.metabolism..as.a.signaling.molecule	0.433474	0.222978	12	5	0.109505	0.161927
VALSYN.PWY..L.valine.biosynthesis	0.268861	0.141531	12	12	0.115915	0.1708
CHLOROPHYLL.SYN..3.8.divinyl.chlorophyllide.a.biosynthesis.I..aerobic..light.dependent.	1.11183	0.648521	12	4	0.117224	0.172121
PWY.6328..L.lysine.degradation.X	0.731707	0.390214	12	7	0.119621	0.175024
PWY.7237..myo...chiro..and.scyllo.inositol.degradation	0.465529	0.276007	12	12	0.122564	0.178703
PWY.6168..flavin.biosynthesis.III..fungi.	0.367088	0.198706	12	11	0.123964	0.179498
PWY.6731..starch.degradation.III	-1.14319	0.618826	12	12	0.12397	0.179498
PWY.2941..L.lysine.biosynthesis.II	-1.3966	0.852555	12	11	0.132433	0.191088
ANAEROFRUCAT.PWY..homolactic.fermentation	0.130272	0.0731794	12	12	0.135165	0.193863
PWY3DJ.35471..L.ascorbate.biosynthesis.IV..animals..D.glucuronate.pathway.	1.46818	0.903655	12	4	0.135286	0.193863
PRPP.PWY..superpathway.of.histidine..purine..and.pyrimidine.biosynthesis	0.396738	0.223633	12	11	0.136233	0.194552
PWY.6317..D.galactose.degradation.I..Leloir.pathway.	0.353352	0.199691	12	12	0.137036	0.195031
PWY.5695..inosine.5..phosphate.degradation	0.246676	0.154753	12	12	0.14202	0.201437
PWY.7942..5.oxo.L.proline.metabolism	0.499541	0.290136	12	12	0.145734	0.205307
PWY66.429..fatty.acid.biosynthesis.initiation..mitochondria.	0.19912	0.126167	12	12	0.145594	0.205307
THREOCAT.PWY..superpathway.of.L.threonine.metabolism	1.0894	0.633995	12	8	0.146379	0.205523
ILEUSYN.PWY..L.isoleucine.biosynthesis.I..from.threonine.	0.211812	0.128426	12	12	0.160002	0.223895
PWY0.162..superpathway.of.pyrimidine.ribonucleotides.de.novo.biosynthesis	-0.449691	0.27501	12	12	0.162939	0.227242
GLYCOLYSIS..glycolysis.I..from.glucose.6.phosphate.	0.160309	0.0986717	12	12	0.16516	0.228316
PWY.6210..2.aminophenol.degradation	0.334858	0.21178	12	2	0.164885	0.228316
PWY.6215..4.chlorobenzoate.degradation	0.347937	0.220339	12	2	0.165351	0.228316
PWY.6897..thiamine.diphosphate.salvage.II	0.157433	0.105892	12	12	0.167918	0.231095
PWY.6628..superpathway.of.L.phenylalanine.biosynthesis	0.142973	0.0963737	12	12	0.168752	0.231479
PWY.7388..octanoyl..acyl.carrier.protein..biosynthesis..mitochondria..yeast.	0.484478	0.328016	12	2	0.170505	0.232355
PWY66.430..myristate.biosynthesis..mitochondria.	0.483899	0.327513	12	2	0.170333	0.232355
URSIN.PWY..ureide.biosynthesis	0.495822	0.337901	12	2	0.173012	0.235004
PWY.7312..dTDP..beta..D.fucofuranose.biosynthesis	-1.64719	1.04438	12	3	0.175578	0.237714
DENOVOPURINE2.PWY..superpathway.of.purine.nucleotides.de.novo.biosynthesis.II	0.371616	0.236714	12	11	0.177235	0.239153
PWY.7396..butanol.and.isobutanol.biosynthesis..engineered.	0.517266	0.356826	12	2	0.177788	0.239153
PWY.5941..glycogen.degradation.II	0.21916	0.140054	12	12	0.178396	0.239199
CRNFORCAT.PWY..creatinine.degradation.I	0.67255	0.434824	12	3	0.182601	0.243404
PWY.5088..L.glutamate.degradation.VIII..to.propanoate.	0.449684	0.298341	12	2	0.182699	0.243404
PWY.3801..sucrose.degradation.II..sucrose.synthase.	0.548303	0.384684	12	2	0.184518	0.245044
PWY.7211..superpathway.of.pyrimidine.deoxyribonucleotides.de.novo.biosynthesis	0.601209	0.391719	12	12	0.185423	0.245465
LPSSYN.PWY..superpathway.of.lipopolysaccharide.biosynthesis	0.274129	0.179337	12	3	0.186914	0.246656
PWY.5392..reductive.TCA.cycle.II	-0.564541	0.399446	12	2	0.187928	0.247211
